# Supplementary material for: Do digital innovations for HIV and sexually transmitted infections work? Results from a systematic review (1996-2017)
Source: PubMed Central journal article supplement (PMC5695353; doi:10.1136/bmjopen-2017-017604), 2017-11-03
Supplement: bmjopen-2017-017604.draft_revisions.pdf [file bmjopen-2017-017604.draft_revisions.pdf]

# BMJ Open

BMJ Open is committed to open peer review. As part of this commitment we make the peer review history of every article we publish publicly available.

When an article is published we post the peer reviewers' comments and the authors' responses online. We also post the versions of the paper that were used during peer review. These are the versions that the peer review comments apply to.

The versions of the paper that follow are the versions that were submitted during the peer review process. They are not the versions of record or the final published versions. They should not be cited or distributed as the published version of this manuscript.

BMJ Open is an open access journal and the full, final, typeset and author-corrected version of record of the manuscript is available on our site with no access controls, subscription charges or pay-per-view fees (<http://bmjopen.bmj.com>).

If you have any questions on BMJ Open's open peer review process please email [editorial.bmjopen@bmj.com](mailto:editorial.bmjopen@bmj.com)

# BMJ Open

## Do Digital Innovations for HIV and Sexually Transmitted Infections work? Results from a Comprehensive Systematic Review (1996-2017).

|                                 |                                                                                                                                                                                                                                                                                                                                                                                                                                                                                                                                  |
|---------------------------------|----------------------------------------------------------------------------------------------------------------------------------------------------------------------------------------------------------------------------------------------------------------------------------------------------------------------------------------------------------------------------------------------------------------------------------------------------------------------------------------------------------------------------------|
| Journal:                        | <i>BMJ Open</i>                                                                                                                                                                                                                                                                                                                                                                                                                                                                                                                  |
| Manuscript ID                   | bmjopen-2017-017604                                                                                                                                                                                                                                                                                                                                                                                                                                                                                                              |
| Article Type:                   | Research                                                                                                                                                                                                                                                                                                                                                                                                                                                                                                                         |
| Date Submitted by the Author:   | 11-May-2017                                                                                                                                                                                                                                                                                                                                                                                                                                                                                                                      |
| Complete List of Authors:       | Daher, Jana; Research Institute of the McGill University Health Centre<br>Vijh, Rohit; Research Institute of the McGill University Health Centre<br>Linthwaite, Blake; Research Institute of the McGill University Health Centre<br>Dave, Saily; Research Institute of the McGill University Health Centre<br>Kim, John; National HIV/AIDS Labs, Public Health Agency of Canada<br>Dheda, Keertan; University of Cape Town<br>Peter, Trevor; Clinton Health Access Initiative (CHAI)<br>Pai, Nitika; McGill University, Medicine |
| <b>Primary Subject Heading</b>: | HIV/AIDS                                                                                                                                                                                                                                                                                                                                                                                                                                                                                                                         |
| Secondary Subject Heading:      | Health services research, Global health                                                                                                                                                                                                                                                                                                                                                                                                                                                                                          |
| Keywords:                       | mHealth/eHealth, Innovations, HIV, Sexually transmitted Infections, systematic reviews                                                                                                                                                                                                                                                                                                                                                                                                                                           |
|                                 |                                                                                                                                                                                                                                                                                                                                                                                                                                                                                                                                  |

SCHOLARONE™  
Manuscripts

only

1  
2  
3 Do Digital Innovations for HIV and Sexually Transmitted Infections work? Results from a  
4 Comprehensive Systematic Review (1996-2017).  
5  
6  
7

8 Jana Daher<sup>1</sup>, MSc (PH), Rohit Vijh<sup>1</sup>, BSc, Blake Linthwaite<sup>1</sup>, BSc, Saily Dave<sup>1</sup>, BSc,  
9 John Kim<sup>2</sup>, PhD, Keertan Dheda<sup>3</sup>, MBBCh, PhD, Trevor Peter<sup>4</sup>, PhD,  
10 Nitika Pant Pai<sup>1,5</sup>, MD PhD  
11  
12  
13

14  
15  
16  
17 Affiliations:

18  
19 <sup>1</sup> Division of Clinical Epidemiology, Research Institute of the McGill University Health Centre,  
20 Montreal, Canada.  
21

22 <sup>2</sup> Chief, National HIV/AIDS Labs, National Labs, Winnipeg, Canada.  
23

24 <sup>3</sup> Professor, Department of Pulmonology, UCT Lung Institute, University of Cape Town, South  
25 Africa.  
26

27 <sup>4</sup> Scientific Director, Diagnostics, Clinton Health Access Initiative (CHAI), Boston, USA.  
28

29 <sup>1,5</sup> Associate Professor, Department of Medicine, McGill University, Montreal, Canada.  
30  
31  
32

33 Corresponding author:

34  
35 [Nitika.pai@mcgill.ca](mailto:Nitika.pai@mcgill.ca)  
36

37 Address: 687 Pine Avenue West Division of Clinical Epidemiology, McGill University Health  
38 Center, Bureau V2.19, Montreal, Canada  
39

40 Telephone number: 514-934-1934 x44729  
41

42 Keywords: mHealth/eHealth; Innovations; HIV; Sexually transmitted Infections; systematic  
43 reviews, meta-analyses.  
44  
45  
46  
47  
48  
49  
50  
51

---

## ABSTRACT

---

### Objective

To control HIV/STI epidemics globally, in overburdened health systems, with high service delivery costs, and a lack of patient engagement, digital innovations on internet/mobile phones offer a potential solution.

To evaluate feasibility and impact of all digital innovations for all HIV/STIs.

**Design:** Systematic review

**Setting/Participants:** All settings/ all participants.

### Intervention

Digital innovations were sub-classified: a) Mobile health based (mhealth: SMS (short message service) /phone calls), b) Internet based mobile and/or electronic health (m/eHealth: social media, avatar-guided computer programs websites, mobile applications, streamed soap opera videos), and c) combined innovations (SMS/phone calls and internet-based m/eHealth)

**Primary and secondary outcome measures:** Feasibility, Acceptability, Impact.

### Methods:

Databases- MEDLINE via PubMed, Embase, Cochrane CENTRAL, and Web of Science were searched. Data were abstracted; heterogeneity was explored; random effects subgroup analysis was performed in only one group that reported consistent measures.

### Results:

99 studies were reviewed- 63 (64%) from America/Europe, 36 (36%) from Africa/Asia.

Break up: Mobile health based innovations-70% (69/99); internet based innovations: 21% (21/99); combined innovations: 9% (9/99).79% (79/99) clinical trials; 84% (83/99) evaluated impact.

Majority of digital innovations were highly acceptable (26/31; 84%) feasible (20/31; 65%), and impacted measures-

Mobile health (SMS) significantly improved ART adherence (pooled OR=2.15 [95%CI: 1.18, 3.91]), clinic attendance (pooled OR=1.76 [95%CI: 1.28, 2.42]).

Internet-based innovations improved clinic attendance (6/6; 100%), ART adherence (4/4; 100%), reduced risk (5/5; 100%) and improved self-care (1/1; 100%).

Combined innovations increased clinic attendance, ART adherence, partner notification, and self-care.

### Conclusion

Overall, digital innovations were acceptable, feasible, and favorably impacted measures.

A recent trend towards a greater use of internet based and combined (internet and mobile) innovations was noted. Cost data were limited.

Findings will appeal to stakeholders aiming to integrate digital innovations in their HIV/STI strategies/programs globally.

1  
2  
3 **Funding:** Grand Challenges Canada, FRSQ.  
4  
5  
6  
7

8 **Strengths of the review**  
9

- 10  
11  
12
  - A Comprehensive and up-to-date systematic review/meta-analysis.
  - All digital innovations for HIV/STIs and all health outcomes were reviewed.
  - Cochrane methodology and PRISMA guidelines followed.
  - Critique of study quality conducted.
  - A subgroup analyses performed when similar outcomes were reported.

13  
14  
15  
16  
17  
18  
19  
20  
21  
22  
23

24 **Limitations of the review**  
25

- 26  
27
  - Cost-effectiveness data from the high HIV/STIs burden regions (i.e., Sub-Saharan Africa and Southeast Asia) were limited.
  - Limited data from Sub-Saharan Africa and Southeast Asia (29%, 29/99).
  - Limited evidence on other STIs (other than HIV) (18/99, 18%).
  - A lack of integrated online impact metrics to evaluate internet-based eHealth innovations.
  - Studies with small sample sizes, low power, insufficient follow-up time (e.g. 3 weeks or less) sometimes provided contradictory results when objective and subjective metrics evaluated the same outcome.

28  
29  
30  
31  
32  
33  
34  
35  
36  
37  
38  
39  
40  
41  
42  
43  
44  
45  
46  
47  
48  
49  
50  
51  
52  
53  
54  
55  
56  
57  
58  
59  
60

## INTRODUCTION

---

HIV/STI infections remain a public health concern worldwide. A million new HIV/STI infections are acquired every day, and their cumulative disease burden exceeds 500 million infections.<sup>1-5</sup> Regarding HIV, many countries are working to meet the UNAIDS 90-90-90 targets;<sup>6</sup> however, structural and societal barriers such as stigma, low socio-economic status, and geographical isolation, impede access to quality care for marginalized populations that are disproportionately impacted by the HIV/AIDS epidemic.<sup>7-8</sup> A lack of timely testing and poor retention in care impairs efforts to control HIV/STIs.<sup>7-10</sup> To improve early testing, linkage and retention in care, health care systems around the world are seeking solutions for population engagement, awareness, and education. Providing efficient care to hard-to-reach populations, while plugging gaps in health care service delivery, is urgently needed.<sup>11-12</sup>

The World Bank estimates that globally, 96% of the world's population and 70% of the world's poorest have access to a mobile phone.<sup>13</sup> Of seven billion, two billion (30%) individuals own a smartphone and approximately 50% of mobile phone users access the internet through their phones.<sup>14-15</sup> Technological access has created a portal for social media and other internet-based health interventions.<sup>16</sup> The rapid diffusion of mobile phones and internet technologies are prime drivers of this disruption in health care service delivery, through a phenomenon aptly titled, the creative destruction of medicine.<sup>17</sup>

Digital innovations such as electronic health (eHealth), mobile health (mhealth), and combined innovations offer promising solutions to improve health service delivery. Ehealth encompasses non-internet and internet-enabled mHealth as well as other internet-based health interventions. These innovations, together with expanded mobile and internet networks, global connectivity, and affordability, present opportunities to change the future landscape of health care service delivery. In recent years, visionary foundations (*Grameen, Bill and Melinda Gates Foundation, UNAIDS, Vodafone*) have increased funding and created opportunities for innovative thinking in health, as demonstrated by ninety-five countries which have evaluated digital innovations to date.<sup>11</sup> This is most evident in under-resourced settings where low-cost, sustainable solutions to solve complex global health challenges are much in demand.<sup>18</sup>

The early use of digital innovations was evident in non-communicable diseases, which gained popularity in infectious disease.<sup>19</sup> In the field of HIV/STIs, a study published in the *Lancet* was the first to demonstrate the effectiveness of mHealth-based SMS innovations on adherence to antiretroviral therapy (ART).<sup>20</sup> As novel digital innovations, strategies and programs continue to be developed and tested, many smaller reviews and systematic reviews were published. However, a vast majority only evaluated a single innovation (e.g. SMS, social media), focused on one or two outcomes, and restricted their populations to select groups (people living with HIV (PLHIV), pregnant women, adolescents, men who have sex with men (MSM)).<sup>21-27</sup> These reviews failed to provide a comprehensive summary of all innovations in one place.

Due to the rapid expansion of the field of digital innovations, and with the increased popularity of combined innovations in recent years (beginning 2013), a need for a comprehensive up-to-date synthesis on all innovations for HIV/STIs was felt. Our objective was therefore to generate a high quality overview/systematic review, following Cochrane methods and guidelines, to

1  
2  
3 summarize all digital innovations across all populations and outcomes. This review compiles and  
4 evaluates all existing data, tailored to inform researchers, policy makers and key stakeholders in  
5 the field of HIV/STI on decisions regarding implementation and scale-up.<sup>11</sup>  
6  
7

## 8 METHODS

---

10  
11 PRISMA (Preferred Reporting Items for Systematic Reviews and Meta-Analyses) guidelines  
12 were followed for the review.<sup>28</sup>  
13

### 14 Data Sources and Searches

15 We searched MEDLINE via PubMed, Embase, Cochrane CENTRAL, and Web of Science for a  
16 21-year period from Feb 1996 up to March 2017, with no language restrictions.  
17

### 18 Search Strategy

19 For MEDLINE: (#1 (“HIV” [MeSH] OR “acquired immunodeficiency syndrome” [tiab]), OR #2  
20 (sexually transmitted infections [mh] OR sexually transmitted disease\* [tiab]), AND #3  
21 (“mHealth” [tiab] OR “mobile health” [tiab] OR short messag\* [tiab] OR “eHealth” [MeSH] OR  
22 “telemedicine” [MeSH] OR social medi\* [tiab] OR “mobile applications” [tiab]) (Refer to  
23 Appendix 1).  
24  
25

### 26 Study Selection

27 Two reviewers independently screened and evaluated citations for eligibility (JD & RV) and two  
28 others (BL & SD) independently assessed quality. A senior reviewer was consulted (NPP) for  
29 discordance.  
30  
31

### 32 Eligibility Criteria

33 Any clinical trials or observational study designs that evaluated any digital (e/mHealth)  
34 technology with any reported outcomes (Refer Figure 1) were included.  
35  
36

### 37 Data Abstraction

38 Two reviewers (RV, JD) independently abstracted all the data. A pre-piloted data abstraction  
39 form, was used to abstract the following items: study design, study population, sample size,  
40 digital innovation type, HIV/STIs, outcome measures (e.g. impact, acceptability and feasibility),  
41 and metrics (e.g. attendance rate, completion rate, satisfaction) (Refer to Appendix 2). We  
42 referred to a previously published framework to define and further classify the following metrics  
43 for impact, acceptability, and feasibility.<sup>29</sup>  
44  
45

### 46 Subgroup Pooled Analyses

47 We classified study designs and then classified digital innovations into three groups:<sup>30</sup>  
48

- 49 a) mHealth (SMS and phone calls only; i.e. non-internet based);
- 50 b) Internet-enabled mHealth and other internet-based eHealth (mobile application, website,  
51 online campaign, streamed soap opera videos, avatar-guided computer programs);
- 52 c) Combined innovations (innovations that combined both mHealth (SMS/phone calls) with  
53 internet enabled m/eHealth).  
54

55  
56 Only one subgroup reported similar outcomes which could be pooled, SMS and phone calls, for  
57 the following outcomes: a) clinic attendance with SMS; and b) ART adherence via Medication  
58  
59  
60

1  
2  
3 Event Monitoring System (MEMS) caps, with SMS. We pooled these outcomes using a random  
4 effects subgroup analysis. Given the diversity in the sample populations between studies, we  
5 used the Dersimonian and Laird random effects frequentist model, weighted by study sample to  
6 calculate a pooled effect. We generated forest plots for visual representation of heterogeneity and  
7 pooled odds ratios (OR) with 95% confidence intervals (95% CI). We performed all statistical  
8 analyses using Stata/IC, version 13 (StataCorp, College Station, Texas USA).<sup>31</sup>  
9  
10

### 11 **Narrative Analysis**

12 We narratively described all other data using as follows:

14 Digital innovations were classified into the following groups based on the strength of evidence:  
15 high/strong evidence (metrics at 75-100%), moderate evidence (51-74%), and low/weak  
16 evidence (50% or less).  
17  
18

19 **Acceptability:** Acceptability was defined as the receptivity in using digital innovations.

20  
21 **Feasibility:** Feasibility was defined as the perceived convenience in using digital innovations. It  
22 was reported with various metrics: completion, retention, response and referral rates.  
23

24 **Impact:** Impact was defined as a statistically significant improvement in measured outcomes  
25 compared to a comparator group (i.e. control group or baseline observations). The metrics used  
26 to evaluate impact were: A) attendance rate, B) ART adherence, C) risk reduction, D) self-care,  
27 E) partner notification. Impact measures were evaluated on two criteria: effect size and precision.  
28 Effect size was assessed when data on a comparator group was made available. Precision of the  
29 effect estimate was assessed whenever reported, as it reflects the variance or spread of results.  
30  
31

### 32 **Quality Assessment**

33 We assessed study quality for both clinical trials and observational studies. We used the  
34 Cochrane Risk of Bias Tool for trials, and Newcastle-Ottawa quality assessment scale for  
35 observational studies.  
36  
37  
38

## 39 **RESULTS**

---

41 Of 4252 citations identified through our extensive search, 792 were selected for full-text  
42 screening, and 99 citations met our inclusion criteria and were included in this review for  
43 evidence synthesis (Refer: Figure 1).  
44  
45

### 46 **Study characteristics**

47 By geographical location, 37% (37/99) of studies were conducted in North America, 26%  
48 (26/99) in Sub-Saharan Africa, 24% (24/99) in Europe, 7% (7/99) in Oceania, 3% (3/99) in  
49 Southeast Asia, and 2% (2/99) in South America.  
50  
51

52 By study design, the majority were trials: 38% (38/99) were RCTs, 16% (16/99) uncontrolled  
53 trials, and 1% (1/99) non-randomised controlled trials. Others included quasi-experimental  
54 studies, of which many used historical controls (24%, 24/99), and observational studies (i.e.  
55 cross-sectional and feasibility studies) (20%, 20/99).  
56  
57  
58  
59  
60



1  
2  
3 HIV was the most frequently reported infection (74%, 73/99 studies), followed by  
4 chlamydia/gonorrhoea (CT/GC) (10%, 10/99). Combinations of HIV with STIs (e.g., syphilis)  
5 (8%, 8/99), human papillomavirus (HPV) (4%, 4/99) and hepatitis A/B/C (HBV) (4%, 4/99)  
6 were also reported.  
7

8  
9 In terms of study populations, people living with HIV were prominent across studies (42%,  
10 42/99) followed by other high-risk groups (i.e. MSM/bisexual men, drug users, pregnant  
11 women/mother-infant pairs, African-Americans, sex workers, and visible minorities) (28%,  
12 28/99), general clinic attendees (16%, 16/99), CT/ HBV infected individuals (4%, 4/99), and  
13 residents of a specific area (9%, 9/99).  
14

### 15 **Innovations**

16 Digital innovations were documented across the spectrum.

17  
18  
19 MHealth innovations (SMS/phone calls only) were evaluated in 70% (69/99) of studies.<sup>20 32-99</sup>  
20 72% (50/69) were SMS-based and 28% (19/69) used phone calls or a combination of both (Refer  
21 to Figure 2).  
22

23 Internet-enabled mHealth and other internet-based eHealth innovations were evaluated in 21%  
24 (21/99) of studies.<sup>100-120</sup> These innovations consisted of many different forms: social media and  
25 online campaigns (9/21), avatar-guided computer programs (2/21), mobile applications (5/21),  
26 combination of social media and websites (2/21), websites (1/21), telemedicine services (1/21)  
27 and streamed soap opera videos (1/21) (Refer to Figure 2).  
28

29  
30 Combined innovations were evaluated in 9% (9/99) of studies.<sup>121-129</sup> Innovations consisted of:  
31 SMS + websites/ interactive websites (4/9), SMS + mobile application (3/9) and SMS + social  
32 media (including online campaigns) (2/9). (Refer to Figure 2).  
33

### 34 **Measures and Metrics**

35 A vast majority (84%, 83/99) of studies focused on impact measure and metrics, while about  
36 12% (12/99) focused only on feasibility, and the remaining 4% (4/99) on acceptability. Within  
37 impact measures, metrics such as clinic attendance rates were reported in 45% (37/83) of studies,  
38 followed by ART adherence at 35% (29/83), HIV/STIs risk reduction behaviors at 13% (11/83),  
39 turnaround time from testing to treatment at 2% (2/83), partner notification at 2% (2/83), and  
40 self-care at 2% (2/83).  
41  
42

### 43 **Subgroup Pooled Analyses**

44 It was possible to perform subgroup analyses on outcomes that were consistently documented:  
45 clinic attendance in 14 quasi-experimental studies that used SMS reminders and MEMS-based  
46 ART adherence in 4 RCTs evaluating SMS. The pooled estimate for the impact of SMS  
47 reminders on attendance rates was 1.76 [95%CI: 1.28, 2.42] (Refer to Figure 3 A). The pooled  
48 estimate for the impact of SMS on ART adherence tracked via MEMS caps was also significant,  
49 OR= 2.15 [95%CI: 1.18, 3.91] (Refer to Figure 3 B).<sup>32 47-48</sup>  
50  
51  
52  
53  
54  
55  
56  
57  
58  
59  
60

## Narrative Analysis

### Impact

#### Non-internet based mHealth (SMS/PC only)

Of 69 studies, positive results were reported for the following outcomes: clinic attendance (63%, 19/30 studies, of which 84% reached statistical significance); ART adherence (63%, 15/24 studies, of which 93% reached statistical significance); turnaround time from testing to treatment (67%, 2/3 studies). However, SMS reported a limited effect on risk reduction behaviors (3/7, 43%).

#### Internet-based m/eHealth:

Studies evaluating internet-based eHealth innovations (21/99) reported results that were largely in favor of the following innovations: social media-based interventions for clinic attendance; avatar-guided and mobile applications for ART adherence; social media, avatar, and soap opera videos for risk reduction behaviors; mobile app for self-care.

Social media contributed to higher testing uptake rates in all studies (6/6, 100%). A social media-based campaign increased HIV testing by 252% (n= 1500; 19% from baseline 5.4%, p<0.01) and Syphilis testing by 248% (18.8% from baseline 5.4%, p<0.01), while another campaign increased HIV testing by 52% compared to control (n=625; 63.7% vs. 42% in controls, OR=2.9 [95%CI: 1.8-4.7]).<sup>100-115</sup> Four campaigns guaranteed rapid in-home HIV testing for all those who requested it online.<sup>100-101 108 111 116</sup>

Avatar-guided programs and mobile applications improved ART adherence in all studies (4/4, 100%). Statistically significant outcomes were reported in 2/4 programs (50%). These were: a) A personalized avatar-guided computer program improved adherence (n=240; p=0.046); b) a mobile application with immunosuppression graphs and medication reminders lowered viral load (n= 28; p=0.023) and improved adherence (p=0.03) as well.<sup>102 104</sup> In the other two studies, an avatar-guided program improved viral suppression and a mobile application allowed for 100% adherence, but these were underpowered to detect a significant effect (n=76 and n=28, respectively).<sup>107 110</sup>

Social media, avatar and soap opera videos were successful at reducing risky sexual behavior in 100% of studies (5/5). However, significant results were reported in only 3/5 studies: a) Social media-based interventions decreased unprotected sex acts by 65% (n=31; 3.11 vs. baseline 8.96, p=0.042); b) soap opera videos on HIV prevention reduced condomless sex by 78% (n=117; 78% reduction from baseline, p<0.001);<sup>103 106</sup> c) An avatar-guided computer program also lowered the odds of HIV transmission (n=240; OR= 0.46, p=0.012).<sup>102-103 106</sup> Even in two underpowered studies, social media-based interventions led to 40% and 67% higher condom uptake (n=70 and n=50, respectively).<sup>105 117</sup>

A mobile app increased self-care in the sole study in this category (1/1; 100%). A significantly higher self-care performance among chronic HBV-infected individuals was reported compared to controls (n=53; p=0.001).<sup>112</sup>

### Combined innovations:

Studies evaluating combined innovations (9/99) showed success of social media + SMS in increasing clinic attendance and partner notification; interactive websites + SMS in improving ART adherence; and mobile app + SMS in increasing self-care. Among the five impact studies, 80% (4/5) reported a favorable outcome. An online campaign with SMS services increased CT, GC, and HIV tests uptake by 41%, 91%, and 190%, respectively;<sup>123</sup> an interactive website with SMS reminders improved ART adherence in drug-users (n=20; p=0.02);<sup>121</sup> a social media-based partner notification with SMS increased notified contacts by 144% (63.5% in 2011 from baseline 26% in 2010);<sup>126</sup> and a mobile app with SMS significantly improved self-care performance in HIV-infected individuals compared to baseline (n=19; p=0.002).<sup>129</sup>

### Acceptability and Feasibility

Overall, across studies that assessed acceptability/feasibility, digital innovations were found to be highly acceptable and feasible (75%-100%) in 26/31 and 20/31 studies, respectively. mHealth innovations (SMS/PC only) were highly acceptable and feasible in 81% (13/16) and 75% (12/16) of studies, respectively.

Internet-based m/eHealth innovations were highly acceptable and feasible in 92% (11/12) and 45% (5/11) of studies, respectively. All included innovations (i.e. avatar, mobile app, social media and streamed videos) were highly acceptable.<sup>102-104 106-107</sup> While avatar-guided programs were rated high on feasibility, social media-based strategies were found to be less feasible<sup>101-103</sup>

Combined innovations were highly acceptable and feasible in 67% (2/3) and 75% (3/4) of studies, respectively.<sup>121 124</sup> The innovations that were rated high involved a combination of SMS and interactive websites.

### Quality

Studies were individually evaluated on quality criteria and biases were noted. Across trials, losses to follow-up were reported in 31% of RCTs and 55% of quasi-trials. Additionally, biases (i.e. misclassification, desirability/recall bias) were of concern in 58% of the RCTs and 64% of quasi randomized trials (Refer to Appendix 3 & 4).

In observational studies, potential biases observed were confounding (68%) and selection bias (66%) were observed. (Refer to Appendix 5).

## DISCUSSION

---

### Summary of findings

Overall, digital innovations reported positive effects on key metrics. We noted a strong positive effect of digital innovations on clinic attendance rates (70%; 26/37), ART adherence (69%; 20/29), risk reduction behaviors (67%; 8/12) and self-care (100%; 2/2). SMS/phone calls were not able to reduce risky sexual behaviours; however social-media based interventions, particularly interactive social media, were effective in reducing risky sexual behaviors. Acceptability was found to be high for all innovations. Feasibility estimates also remained high

1  
2  
3 for all innovations, except for social media-based interventions, possibly due to a perceived lack  
4 of privacy and confidentiality. Combined innovations may thus offer promise in plugging this  
5 feasibility gap, with internet-based innovations compensating for limitations in SMS-only  
6 strategies and vice versa.  
7

8  
9 While mHealth (SMS/phone calls only) innovations were highly effective in improving clinic  
10 attendance, ART adherence, and turnaround time from testing to treatment, they did not report  
11 on other outcomes. It should be noted that SMS and phone calls alone failed to reduce risky  
12 sexual behaviors, which was not surprising as it is challenging to reduce risky behaviors with a  
13 prescriptive SMS alone. Population engagement is essential for risk reduction through qualitative  
14 research.  
15

16  
17 While internet-based m/eHealth innovations (social media, avatar-guided computer programs,  
18 mobile apps, and soap opera videos) demonstrated positive evidence on impact metrics, not all  
19 studies reached statistical significance. Those that failed to report a statistically significant  
20 improvement in ART adherence had small sample sizes and were underpowered to detect these  
21 outcomes (n=76 vs. n=240), and had less frequent sessions over a shorter evaluation period (2  
22 sessions over 6 months vs. 4 sessions over 9 months).<sup>102 107</sup> For mobile applications, studies  
23 which reported significant effects recruited participants with varying level of adherence,<sup>104 110</sup>  
24 compared with studies which had high adherence at baseline ( $\geq 95\%$ ) and did not show  
25 significance (due to smaller changes in effect). For social media-based campaigns, the two  
26 studies that did not reach statistical significance in reducing risky sexual behaviors lacked an  
27 interactive component and simply displayed educational material, while the study that showed  
28 significant effect engaged the participants by allowing them to contact professional cognitive  
29 behavioral therapists via live chat sessions.<sup>103 105 117</sup>  
30  
31  
32

33 In terms of quality, confounding and selection bias were noted in observational and quasi-  
34 experimental studies, and loss to follow-up in some trials. Nevertheless, the overall validity of  
35 the findings from this review was not threatened by biases, as a large proportion of our data was  
36 derived from trials. Consistent reporting of metrics was lacking, which prevented a  
37 comprehensive meta-analysis. While clinical trials were generally high quality, observational  
38 studies were medium to low quality. Objectives, end points, metrics, and measures, are equally  
39 important in feasibility studies and must well designed to generate high quality evidence.  
40  
41

42 Our review is an exhaustive assessment of the role of digital innovations in improving prevention  
43 and care for HIV/STIs. Our findings resonate with many smaller systematic reviews, which have  
44 separately evaluated individual components of digital innovation, such as SMS-based  
45 mHealth.<sup>22-23 130-137</sup> Other systematic reviews evaluating social media-based interventions  
46 reported similar findings to ours, in improved testing uptake or improvements in sexual health.<sup>25-  
47 27 138-139</sup>  
48  
49

50 Our review makes a valuable addition to the growing body of evidence by highlighting the  
51 success of other interactive and engaging innovations such as avatar-guided computer programs,  
52 mobile apps, streamed soap opera videos, and combined innovations. These are becoming  
53 popular, with their power to engage audiences at many levels. Designing combined innovations  
54 offers complementarity with media, methods, platforms, and messaging. This complementarity  
55 can encourage participant engagement, and improve prevention and care metrics and measures  
56  
57  
58  
59  
60

1  
2  
3 sustainably over time. This is more challenging when only one innovation (e.g. mHealth  
4 SMS/phone calls only) is the sole focus.  
5

### 6 **Caveats and implications for future research**

7 There are some caveats to consider while designing and evaluating digital innovations.  
8 Innovations aiming to reduce risky sexual behaviors need to be interactive and tailored to the  
9 setting and population, with a deep understanding of patients' needs and preferences.<sup>137 140-141</sup>  
10 Any communication with patients should be customized for timing to avoid uptake fatigue. For  
11 example, patients may be more responsive to weekly versus daily SMS ART reminders.<sup>32 142</sup>  
12 Future research needs to be focussed on tailoring innovations to the context and population, and  
13 program objectives.  
14  
15

16  
17 Study quality is essential to generating meaningful results. Large and representative samples of  
18 the underlying population and sound statistical techniques during data analysis can prevent or  
19 address selection bias. Exploring reasons for differential loss to follow-up would inform future  
20 studies. Wherever possible, a control group should be included to differentiate Hawthorne effect  
21 from the effect of the intervention.<sup>143</sup> Trials and impact designs can prevent or reduce  
22 confounding. Following checklists, such as the report recently published by the WHO mHealth  
23 Technical Evidence Review Group on reporting of mHealth innovations, is suggested and  
24 encouraged.<sup>144</sup>  
25  
26

27 Objective measures (e.g. HIV/STIs diagnosis, VL load) are desired in reporting of quantitative  
28 outcomes, over subjective self-reported data (e.g. condom use, self-reported adherence). This  
29 could potentially reduce some biases (misclassification/desirability bias/recall bias). Qualitative  
30 data are rich and complement the understanding of all the contextual and population needs, and  
31 capture the dynamics of sustainability and change. They need to be urgently integrated with  
32 quantitative data to provide a holistic picture of innovation.  
33  
34

35 The quality of digital data requires improvement. Across studies, a lack of integrated online  
36 impact metrics in evaluating the success of innovations was evident. With continuously evolving  
37 digital media, inventing new ways to evaluate acceptability and feasibility becomes necessary.  
38 For example, some studies tracked online metrics via Google analytics.<sup>74 100-101 121-124</sup> Synergy  
39 with industry powered metrics could be a new wave to measure success.  
40  
41

42 To scale up proven innovations, a multi-stakeholder engagement is necessary. For that, data and  
43 metrics that appeal to all sections of stakeholders are needed. In addition to improving the quality  
44 of randomized controlled trials and quasi-experimental impact studies, qualitative studies, cost  
45 effectiveness studies, usability studies, are needed.  
46  
47

### 48 **Implications for policy and practice**

49 In consonance with other systematic reviews, evidence at-scale was scarce.<sup>138</sup> This limits the  
50 projection of the long-term effectiveness of digital innovations. More evidence on scale-up, cost  
51 savings and cost-effectiveness from Sub Saharan Africa and Asia is needed. Future investments  
52 that incentivize both: the development and evaluation of combined innovations by government  
53 and industry alike, and focus on sustainability of digital innovations with public and private  
54 partnerships, are urgently needed.  
55  
56  
57  
58  
59  
60



## CONCLUSION

---

To control HIV/STIs globally, we need novel and disruptive innovations that will uniquely impact health outcomes across the spectrum of access, engagement, treatment and retention so as to impact health service delivery. On one hand, mHealth (SMS/phone calls only) and internet-based m/eHealth were found acceptable, feasible and offered complementarity in improving prevention and care of HIV/STIs. On the other hand, when combined, they provided customized and contextualized solutions for hard-to-reach populations. Integrating these innovations across various levels of healthcare with clear evaluation, monitoring, and documentation of metrics will help enhance existing health service delivery models to impact health outcomes over time. Findings from this comprehensive review will be informative to all stakeholders – innovators, researchers, healthcare practitioners, policy makers and funders – worldwide seeking evidence on innovations across the spectrum of HIV/STI care.

## ACKNOWLEDGEMENT

---

The authors would like to acknowledge Ms. Megan Smallwood for her assistance in editing the manuscript.

## FOOTNOTES

---

### **Contributors:**

NPP and JD: concept, design.

NPP: data critiquing, write-up, critique, and overall responsibility of the data.

JD: data synthesis, write-up, critiquing.

RV, BL and SD: data synthesis, write-up and critique.

JK, TP and KD: write-up and critique.

Final version approved by all authors

### **Competing Interests:**

There are no conflicts of interest

### **Data Sharing:**

No additional data are available. This is a systematic review/syntheses of existing studies, therefore all data are reported in the tables.

### **Funding:**

Grand Challenges Canada Transition to Scale; Grant number 0710-05.  
FRSQ salary award Chercheur Junior 1.

## REFERENCES

1. The World Health Organization. Sexually transmitted infections (STIs): Fact sheet N°110: WHO Media Centre; 2015 [updated December 2015. Available from: <http://www.who.int/mediacentre/factsheets/fs110/en/> accessed 27 January 2016.
2. The World Health Organization. Hepatitis B: Fact sheet N°204: WHO Media Centre; 2015 [updated July 2015. Available from: <http://www.who.int/mediacentre/factsheets/fs204/en/> accessed 27 January 2016.
3. The World Health Organization. Hepatitis C: Fact sheet N°164 2015 [updated July 2015. Available from: <http://www.who.int/mediacentre/factsheets/fs164/en/> accessed 27 January 2016.
4. The Joint United Nations Programme on HIV/AIDS. Fact Sheet 2015 2015 [Available from: <http://www.unaids.org/en/resources/campaigns/HowAIDSchangedeverything/factsheet> accessed 17 December 2016.
5. Newman L, Rowley J, Vander Hoorn S, et al. Global Estimates of the Prevalence and Incidence of Four Curable Sexually Transmitted Infections in 2012 Based on Systematic Review and Global Reporting. *PLoS One* 2015;10(12):e0143304. doi: 10.1371/journal.pone.0143304  
PONE-D-15-31044 [pii] [published Online First: 2015/12/10]
6. The Joint United Nations Programme on HIV/AIDS. The Gap Report. Geneva: UNAIDS, 2014.
7. Kagee A, Remien RH, Berkman A, et al. Structural barriers to ART adherence in Southern Africa: Challenges and potential ways forward. *Glob Public Health* 2011;6(1):83-97. doi: 922541258 [pii]  
10.1080/17441691003796387 [published Online First: 2010/05/29]
8. Pai NP. Multiplexed point-of-care assays for HIV and co-infections for resource constrained settings: a perspective. *Future Microbiol* 2015;10(9):1393-6. doi: 10.2217/fmb.15.77 [published Online First: 2015/09/09]
9. Pai NP, Vadnais C, Denkinger C, et al. Point-of-care testing for infectious diseases: diversity, complexity, and barriers in low- and middle-income countries. *PLoS Med* 2012;9(9):e1001306. doi: 10.1371/journal.pmed.1001306  
PMEDICINE-D-12-01227 [pii] [published Online First: 2012/09/14]
10. Rosen S, Fox MP. Retention in HIV care between testing and treatment in sub-Saharan Africa: a systematic review. *PLoS Med* 2011;8(7):e1001056. doi: 10.1371/journal.pmed.1001056  
PMEDICINE-D-11-00096 [pii] [published Online First: 2011/08/04]
11. Ryu S. Book Review: mHealth: New Horizons for Health through Mobile Technologies: Based on the Findings of the Second Global Survey on eHealth (Global Observatory for eHealth Series, Volume 3). *Healthcare Informatics research* 2012;18(3):231-33. doi: 10.4258/hir.2012.18.3.231
12. Free C, Phillips G, Watson L, et al. The effectiveness of mobile-health technologies to improve health care service delivery processes: a systematic review and meta-analysis. *PLoS Med* 2013;10(1):e1001363. doi: 10.1371/journal.pmed.1001363  
PMEDICINE-D-12-00641 [pii] [published Online First: 2013/03/06]
13. The World Bank. Maximizing Mobile: Information and Communication Technologies for Development. . Washington DC: International Bank for Reconstruction and Development The World Bank 2012.
14. eMarketer. Smartphone user penetration as percentage of total global population from 2011 to 2018. : Statistica- The Statistics Portal; 2014 [Available from: <http://www.statista.com/statistics/203734/global-smartphone-penetration-per-capita-since-2005/> accessed 19 February 2016.

15. eMarketer. Mobile phone internet user penetration worldwide from 2014 to 2019. : Statistica- The Statistics Portal; 2014 [Available from: <http://www.statista.com/statistics/284202/mobile-phone-internet-user-penetration-worldwide/> accessed 19 February 2016.
16. Oulasvirta A, Rattenbury T, Ma L, et al. Habits make smartphone use more pervasive. *Personal and Ubiquitous Computing* 2012;16(1):105-14.
17. Topol EJ. The creative destruction of medicine: How the digital revolution will create better health care. . New York: Basic Books 2012.
18. Akter S, Ray P. mHealth - an Ultimate Platform to Serve the Unserved. *Yearb Med Inform* 2010;94-100. doi: me10010094 [pii] [published Online First: 2010/10/13]
19. Ali EE, Chew L, Yap KYL. Evolution and current status of mhealth research: A systematic review. *BMJ Innov* 2016;2(1):33-40. doi: 10.1136/bmjinnov-2015-000096
20. Lester RT, Ritvo P, Mills EJ, et al. Effects of a mobile phone short message service on antiretroviral treatment adherence in Kenya (WelTel Kenya1): a randomised trial. *Lancet* 2010;376(9755):1838-45. doi: S0140-6736(10)61997-6 [pii] 10.1016/S0140-6736(10)61997-6 [published Online First: 2010/11/13]
21. Ambia J, Mandala J. A systematic review of interventions to improve prevention of mother-to-child HIV transmission service delivery and promote retention. *Journal of the International AIDS Society* 2016;19(1):20309. doi: 10.7448/ias.19.1.20309 [published Online First: 2016/04/09]
22. Conserve DF, Jennings L, Aguiar C, et al. Systematic review of mobile health behavioural interventions to improve uptake of HIV testing for vulnerable and key populations. *J Telemed Telecare* 2017;23(2):347-59. doi: 10.1177/1357633x16639186 [published Online First: 2016/04/09]
23. L'Engle KL, Mangone ER, Parcesepe AM, et al. Mobile Phone Interventions for Adolescent Sexual and Reproductive Health: A Systematic Review. *Pediatrics* 2016;138(3) doi: 10.1542/peds.2016-0884 [published Online First: 2016/08/25]
24. Lima IC, Galvao MT, Alexandre Hde O, et al. Information and communication technologies for adherence to antiretroviral treatment in adults with HIV/AIDS. *Int J Med Inform* 2016;92:54-61. doi: 10.1016/j.ijmedinf.2016.04.013 [published Online First: 2016/06/19]
25. Dunne A, McIntosh J, Mallory D. Adolescents, Sexually Transmitted Infections, and Education Using Social Media: A Review of the Literature. *JNP-J Nurse Pract* 2014;10(6):409-16. doi: 10.1016/j.nurpra.2014.03.020
26. Jones K, Eathington P, Baldwin K, et al. The Impact of Health Education Transmitted Via Social Media or Text Messaging on Adolescent and Young Adult Risky Sexual Behavior: A Systematic Review of the Literature. *Sex Transm Dis* 2014;41(7):413-19. doi: 10.1097/olq.0000000000000146
27. Schnall R, Travers J, Rojas M, et al. eHealth Interventions for HIV Prevention in High-Risk Men Who Have Sex With Men: A Systematic Review. *J Med Internet Res* 2014;16(5):228-37. doi: 10.2196/jmir.3393
28. Moher D, Liberati A, Tetzlaff J, et al. Preferred reporting items for systematic reviews and meta-analyses: the PRISMA statement. *Ann Intern Med* 2009;151(4):264-9, W64. doi: 0000605-200908180-00135 [pii] [published Online First: 2009/07/23]
29. Chiavegatti T, Vijh R, Pant Pai N. Metrics beyond accuracy for HIV point-of-care tests: a systematic review of evidence. *Canadian Journal of Infectious Diseases & Medical Microbiology* 2014;25(Suppl A):90A.
30. Pai M, Filion K. Classification of study designs (Version 8) Montreal: McGill University; 2014 [Available from: <http://www.teachepi.org/documents/courses/Classification%20Design.pdf>.
31. Harris R, Bradburn M, Deeks J, et al. metan: fixed- and random-effects meta-analysis. *Stata Journal* 2008;8(1):3-28.
32. Pop-Eleches C, Thirumurthy H, Habyarimana JP, et al. Mobile phone technologies improve adherence to antiretroviral treatment in a resource-limited setting: a randomized controlled trial of text



- 1  
2  
3 message reminders. *AIDS* 2011;25(6):825-34. doi: 10.1097/QAD.0b013e32834380c1 [published  
4 Online First: 2011/01/22]
- 5  
6 33. Dowshen N, Kuhns LM, Johnson A, et al. Improving adherence to antiretroviral therapy for youth  
7 living with HIV/AIDS: a pilot study using personalized, interactive, daily text message  
8 reminders. *J Med Internet Res* 2012;14(2):e51. doi: v14i2e51 [pii]  
9 10.2196/jmir.2015 [published Online First: 2012/04/07]
- 10  
11 34. Menon-Johansson AS, McNaught F, Mandalia S, et al. Texting decreases the time to treatment for  
12 genital Chlamydia trachomatis infection. *Sex Transm Infect* 2006;82(1):49-51. doi: 82/1/49 [pii]  
13 10.1136/sti.2004.014381 [published Online First: 2006/02/08]
- 14  
15 35. Finocchiaro-Kessler S, Gautney BJ, Khamadi S, et al. If you text them, they will come: using the HIV  
16 infant tracking system to improve early infant diagnosis quality and retention in Kenya. *AIDS*  
17 2014;28 Suppl 3:S313-21. doi: 10.1097/QAD.0000000000000332  
18 00002030-201407001-00011 [pii] [published Online First: 2014/07/06]
- 19  
20 36. Lim EJ, Haar J, Morgan J. Can text messaging results reduce time to treatment of Chlamydia  
21 trachomatis? *Sex Transm Infect* 2008;84(7):563-4. doi: sti.2008.032441 [pii]  
22 10.1136/sti.2008.032441 [published Online First: 2008/08/30]
- 23  
24 37. Bailey S, Scalley B, Gilles M. Text 2 treat - using SMS to recall clients for treatment. *Int J STD AIDS*  
25 2014;25(14):1038-40. doi: 0956462414530108 [pii]  
26 10.1177/0956462414530108 [published Online First: 2014/04/04]
- 27  
28 38. Smillie K, Van Borek N, Abaki J, et al. A qualitative study investigating the use of a mobile phone  
29 short message service designed to improve HIV adherence and retention in care in Canada  
30 (WelTel BC1). *J Assoc Nurses AIDS Care* 2014;25(6):614-25. doi: S1055-3290(14)00040-5 [pii]  
31 10.1016/j.jana.2014.01.008 [published Online First: 2014/04/29]
- 32  
33 39. Reback CJ, Fletcher JB, Shoptaw S, et al. Exposure to Theory-Driven Text Messages is Associated  
34 with HIV Risk Reduction Among Methamphetamine-Using Men Who have Sex with Men. *AIDS*  
35 *Behav* 2015;19 Suppl 2:130-41. doi: 10.1007/s10461-014-0985-7 [published Online First:  
36 2015/01/08]
- 37  
38 40. Evans C, Turner K, Blake H, et al. Text messaging to encourage uptake of HIV testing amongst  
39 African communities: Findings from a theory based feasibility study. *HIV Medicine*  
40 2015;16(Suppl 2):54.
- 41  
42 41. Dowshen N, Kuhns LM, Gray C, et al. Feasibility of interactive text message response (ITR) as a  
43 novel, real-time measure of adherence to antiretroviral therapy for HIV+ youth. *AIDS Behav*  
44 2013;17(6):2237-43. doi: 10.1007/s10461-013-0464-6 [published Online First: 2013/04/03]
- 45  
46 42. Cornelius JB, Dmochowski J, Boyer C, et al. Text-messaging-enhanced HIV intervention for African  
47 American adolescents: a feasibility study. *J Assoc Nurses AIDS Care* 2013;24(3):256-67. doi:  
48 S1055-3290(12)00140-9 [pii]  
49 10.1016/j.jana.2012.06.005 [published Online First: 2012/11/06]
- 50  
51 43. Ammassari A, Trotta MP, Mussini C, et al. Mobile phone intervention based on short message system  
52 (SMS) improve adherence behavior in HIV-infected non-adherent to antiretroviral therapy. The  
53 HI-Vision Study. *Infection* 2010;38(Suppl 52):52.
- 54  
55 44. Ammassari A, Trotta MP, Shalev N, et al. Timed short messaging service improves adherence and  
56 virological outcomes in HIV-1-infected patients with suboptimal adherence to antiretroviral  
57 therapy. *J Acquir Immune Defic Syndr* 2011;58(4):e113-5. doi: 10.1097/QAI.0b013e3182359d2a  
58 00126334-201112010-00015 [pii] [published Online First: 2011/10/29]
- 59  
60 45. Segaren N, Lewis T, Desinor O, et al. The distribution and use of cell phones to mothers of HIV-  
positive infants identified by the Haiti National Early Infant Diagnosis of HIV program (EID): a  
model for increasing adherence? XIX International AIDS Conference Washington DC, 2012.
46. Sheppard Z, Walsh J, Weston R. The TRxCare™ adherence support system: a pilot study of its  
acceptability to patients on virologically successful HAART. 18th Annual Conference of British  
HIV Association Birmingham, 2012.

- 1  
2  
3  
4  
5  
6  
7  
8  
9  
10  
11  
12  
13  
14  
15  
16  
17  
18  
19  
20  
21  
22  
23  
24  
25  
26  
27  
28  
29  
30  
31  
32  
33  
34  
35  
36  
37  
38  
39  
40  
41  
42  
43  
44  
45  
46  
47  
48  
49  
50  
51  
52  
53  
54  
55  
56  
57  
58  
59  
60
47. da Costa TM, Barbosa BJ, Gomes e Costa DA, et al. Results of a randomized controlled trial to assess the effects of a mobile SMS-based intervention on treatment adherence in HIV/AIDS-infected Brazilian women and impressions and satisfaction with respect to incoming messages. *Int J Med Inform* 2012;81(4):257-69. doi: S1386-5056(11)00204-8 [pii] 10.1016/j.ijmedinf.2011.10.002 [published Online First: 2012/02/03]
48. Sabin LL, Bachman DeSilva M, Gill CJ, et al. Improving Adherence to Antiretroviral Therapy With Triggered Real-time Text Message Reminders: The China Adherence Through Technology Study. *J Acquir Immune Defic Syndr* 2015;69(5):551-9. doi: 10.1097/QAI.0000000000000651 [published Online First: 2015/04/19]
49. Brook G, Farmer T, Murphy S, et al. Using SMS text reminders to reduce 'did not attend' (DNA) rates in sexual health and HIV appointment clinics. *Sex Transm Infect* 2013;89(Suppl 1):A1-A428.
50. Kliner M, Knight A, Mamvura C, et al. Using no-cost mobile phone reminders to improve attendance for HIV test results: a pilot study in rural Swaziland. *Infect Dis Poverty* 2013;2(1):12. doi: 2049-9957-2-12 [pii] 10.1186/2049-9957-2-12 [published Online First: 2013/07/16]
51. Farmer T, Brook G, McSorley J, et al. Using short message service text reminders to reduce 'did not attend' rates in sexual health and HIV appointment clinics. *Int J STD AIDS* 2014;25(4):289-93. doi: 0956462413502325 [pii] 10.1177/0956462413502325 [published Online First: 2013/09/04]
52. Brook G, Burton J, McSorley J, et al. The effectiveness of SMS texts for reminding patients at high risk of STIs and HIV to return for testing. *Sex Transm Infect* 2013;89(Suppl 1):A1-A428.
53. Guy R, Wand H, Knight V, et al. SMS reminders improve re-screening in women and heterosexual men with chlamydia infection at Sydney Sexual Health Centre: a before-and-after study. *Sex Transm Infect* 2013;89(1):11-5. doi: sextrans-2011-050370 [pii] 10.1136/sextrans-2011-050370 [published Online First: 2012/04/21]
54. Burton J, Brook G, McSorley J, et al. The utility of short message service (SMS) texts to remind patients at higher risk of STIs and HIV to reattend for testing: a controlled before and after study. *Sex Transm Infect* 2014;90(1):11-3. doi: sextrans-2013-051228 [pii] 10.1136/sextrans-2013-051228 [published Online First: 2013/09/26]
55. Desai M, Burns F, Mercey D, et al. Active recall of men who have sex with men (MSM) for an HIV/STI testing: a feasible and effective strategy? *HIV Medicine* 2014;15(Suppl 3):17-159.
56. Kharbanda EO, Stockwell MS, Fox HW, et al. Text message reminders to promote human papillomavirus vaccination. *Vaccine* 2011;29(14):2537-41. doi: S0264-410X(11)00125-3 [pii] 10.1016/j.vaccine.2011.01.065 [published Online First: 2011/02/09]
57. Vilella A, Bayas JM, Diaz MT, et al. The role of mobile phones in improving vaccination rates in travelers. *Prev Med* 2004;38(4):503-9. doi: 10.1016/j.ypmed.2003.12.005 S0091743503003475 [pii] [published Online First: 2004/03/17]
58. Downing SG, Cashman C, McNamee H, et al. Increasing chlamydia test of re-infection rates using SMS reminders and incentives. *Sex Transm Infect* 2013;89(1):16-9. doi: sextrans-2011-050454 [pii] 10.1136/sextrans-2011-050454 [published Online First: 2012/06/26]
59. Odeny TA, Bailey RC, Bukusi EA, et al. Text messaging to improve attendance at post-operative clinic visits after adult male circumcision for HIV prevention: a randomized controlled trial. *PLoS One* 2012;7(9):e43832. doi: 10.1371/journal.pone.0043832 PONE-D-12-11992 [pii] [published Online First: 2012/09/08]
60. de Tolly K, Skinner D, Nembaware V, et al. Investigation into the use of short message services to expand uptake of human immunodeficiency virus testing, and whether content and dosage have impact. *Telemed J E Health* 2012;18(1):18-23. doi: 10.1089/tmj.2011.0058 [published Online First: 2011/12/14]

- 1  
2  
3  
4  
5  
6  
7  
8  
9  
10  
11  
12  
13  
14  
15  
16  
17  
18  
19  
20  
21  
22  
23  
24  
25  
26  
27  
28  
29  
30  
31  
32  
33  
34  
35  
36  
37  
38  
39  
40  
41  
42  
43  
44  
45  
46  
47  
48  
49  
50  
51  
52  
53  
54  
55  
56  
57  
58  
59  
60
61. Bigna JJ, Noubiap JJ, Kouanfack C, et al. Effect of mobile phone reminders on follow-up medical care of children exposed to or infected with HIV in Cameroon (MORE CARE): a multicentre, single-blind, factorial, randomised controlled trial. *Lancet Infect Dis* 2014;14(7):600-8. doi: S1473-3099(14)70741-8 [pii]  
10.1016/S1473-3099(14)70741-8 [published Online First: 2014/06/17]
62. Rand CM, Brill H, Albertin C, et al. Effectiveness of centralized text message reminders on human papillomavirus immunization coverage for publicly insured adolescents. *J Adolesc Health* 2015;56(5 Suppl):S17-20. doi: S1054-139X(14)00707-1 [pii]  
10.1016/j.jadohealth.2014.10.273 [published Online First: 2015/04/13]
63. Matheson EC, Derouin A, Gagliano M, et al. Increasing HPV vaccination series completion rates via text message reminders. *J Pediatr Health Care* 2014;28(4):e35-9. doi: S0891-5245(13)00293-9 [pii]  
10.1016/j.pedhc.2013.09.001 [published Online First: 2013/11/10]
64. Schwartz SR, Clouse K, Yende N, et al. Acceptability and Feasibility of a Mobile Phone-Based Case Management Intervention to Retain Mothers and Infants from an Option B+ Program in Postpartum HIV Care. *Matern Child Health J* 2015;19(9):2029-37. doi: 10.1007/s10995-015-1715-0 [published Online First: 2015/02/07]
65. Belzer ME, Naar-King S, Olson J, et al. The use of cell phone support for non-adherent HIV-infected youth and young adults: an initial randomized and controlled intervention trial. *AIDS Behav* 2014;18(4):686-96. doi: 10.1007/s10461-013-0661-3 [published Online First: 2013/11/26]
66. Maduka O, Tobin-West CI. Adherence counseling and reminder text messages improve uptake of antiretroviral therapy in a tertiary hospital in Nigeria. *Niger J Clin Pract* 2013;16(3):302-8. doi: NigerJClinPract\_2013\_16\_3\_302\_113451 [pii]  
10.4103/1119-3077.113451 [published Online First: 2013/06/19]
67. Kebaya L, Nduati R, Bashir A. Efficacy of mobile phone use on adherence to nevirapine prophylaxis and retention in care among the HIV-exposed infants in PMTCT: a randomized controlled trial. *Arch Dis Child* 2014;99(Suppl 2):A1-A620.
68. Hardy H, Kumar V, Doros G, et al. Randomized controlled trial of a personalized cellular phone reminder system to enhance adherence to antiretroviral therapy. *AIDS Patient Care STDS* 2011;25(3):153-61. doi: 10.1089/apc.2010.0006 [published Online First: 2011/02/18]
69. DiClemente RJ, Wingood GM, Sales JM, et al. Efficacy of a telephone-delivered sexually transmitted infection/human immunodeficiency virus prevention maintenance intervention for adolescents: a randomized clinical trial. *JAMA Pediatr* 2014;168(10):938-46. doi: 1899236 [pii]  
10.1001/jamapediatrics.2014.1436 [published Online First: 2014/08/27]
70. Cornelius JB, Cato M, Lawrence JS, et al. Development and pretesting multimedia HIV-prevention text messages for mobile cell phone delivery. *J Assoc Nurses AIDS Care* 2011;22(5):407-13. doi: S1055-3290(10)00224-4 [pii]  
10.1016/j.jana.2010.11.007 [published Online First: 2011/01/25]
71. Dean AL, Makin JD, Kydd AS, et al. A pilot study using interactive SMS support groups to prevent mother-to-child HIV transmission in South Africa. *J Telemed Telecare* 2012;18(7):399-403. doi: jtt.2012.120118 [pii]  
10.1258/jtt.2012.120118 [published Online First: 2012/10/05]
72. Juzang I, Fortune T, Black S, et al. A pilot programme using mobile phones for HIV prevention. *J Telemed Telecare* 2011;17(3):150-3. doi: jtt.2010.091107 [pii]  
10.1258/jtt.2010.091107 [published Online First: 2011/01/29]
73. Kalichman SC, Kalichman MO, Cherry C, et al. Brief behavioral self-regulation counseling for HIV treatment adherence delivered by cell phone: an initial test of concept trial. *AIDS Patient Care STDS* 2011;25(5):303-10. doi: 10.1089/apc.2010.0367 [published Online First: 2011/04/05]

- 1  
2  
3  
4  
5  
6  
7  
8  
9  
10  
11  
12  
13  
14  
15  
16  
17  
18  
19  
20  
21  
22  
23  
24  
25  
26  
27  
28  
29  
30  
31  
32  
33  
34  
35  
36  
37  
38  
39  
40  
41  
42  
43  
44  
45  
46  
47  
48  
49  
50  
51  
52  
53  
54  
55  
56  
57  
58  
59  
60
74. Mbuagbaw L, Thabane L, Ongolo-Zogo P, et al. The Cameroon Mobile Phone SMS (CAMPS) trial: a randomized trial of text messaging versus usual care for adherence to antiretroviral therapy. *PLoS One* 2012;7(12):e46909. doi: 10.1371/journal.pone.0046909  
PONE-D-12-24092 [pii] [published Online First: 2012/12/14]
75. Moore DJ, Poquette A, Casaletto KB, et al. Individualized texting for adherence building (iTAB): improving antiretroviral dose timing among HIV-infected persons with co-occurring bipolar disorder. *AIDS Behav* 2015;19(3):459-71. doi: 10.1007/s10461-014-0971-0 [published Online First: 2014/12/17]
76. Norton BL, Person AK, Castillo C, et al. Barriers to using text message appointment reminders in an HIV clinic. *Telemed J E Health* 2014;20(1):86-9. doi: 10.1089/tmj.2012.0275 [published Online First: 2013/10/29]
77. Odeny TA, Bailey RC, Bukusi EA, et al. Effect of text messaging to deter early resumption of sexual activity after male circumcision for HIV prevention: a randomized controlled trial. *J Acquir Immune Defic Syndr* 2014;65(2):e50-7. doi: 10.1097/QAI.0b013e3182a0a050 [published Online First: 2013/07/13]
78. Bauermeister J, Carballo-Dieiguez A, Giguere R, et al. Interactive voice response system (IVRS): data quality considerations and lessons learned during a microbicide placebo adherence trial with young men who have sex with men. *Journal of Adolescent Health* 2014;54(2):S57-S58.
79. Belzer ME, Kolmodin MacDonell K, Clark LF, et al. Acceptability and Feasibility of a Cell Phone Support Intervention for Youth Living with HIV with Nonadherence to Antiretroviral Therapy. *AIDS Patient Care STDS* 2015;29(6):338-45. doi: 10.1089/apc.2014.0282 [published Online First: 2015/05/01]
80. Shet A, De Costa A, Kumarasamy N, et al. Effect of mobile telephone reminders on treatment outcome in HIV: evidence from a randomised controlled trial in India. *BMJ* 2014;349:g5978. [published Online First: 2014/01/01]
81. Reid MJ, Dhar SI, Cary M, et al. Opinions and attitudes of participants in a randomized controlled trial examining the efficacy of SMS reminders to enhance antiretroviral adherence: a cross-sectional survey. *J Acquir Immune Defic Syndr* 2014;65(2):e86-8. doi: 10.1097/QAI.0b013e3182a9c72b  
00126334-201402010-00027 [pii] [published Online First: 2014/01/21]
82. Roth AM, Hensel DJ, Fortenberry JD, et al. Feasibility and acceptability of cell phone diaries to measure HIV risk behavior among female sex workers. *AIDS Behav* 2014;18(12):2314-24. doi: 10.1007/s10461-014-0718-y [published Online First: 2014/03/20]
83. Barnabas RV, van Rooyen H, Tumwesigye E, et al. Uptake of antiretroviral therapy and male circumcision after community-based HIV testing and strategies for linkage to care versus standard clinic referral: a multisite, open-label, randomised controlled trial in South Africa and Uganda. *The lancet HIV* 2016;3(5):e212-20. doi: 10.1016/s2352-3018(16)00020-5 [published Online First: 2016/04/30]
84. Bassett IV, Coleman SM, Giddy J, et al. Sizanani: A Randomized Trial of Health System Navigators to Improve Linkage to HIV and TB Care in South Africa. *J Acquir Immune Defic Syndr* 2016;73(2):154-60. doi: 10.1097/qai.0000000000001025 [published Online First: 2016/09/16]
85. Cantudo-Cuenca MR, Manzano-Garcia M, Jimenez-Galan R, et al. Effect of mobile phone short messages on antiretroviral treatment adherence among HIV infected patients. *International Journal of Clinical Pharmacy* 2016;38 (6):517. doi: <http://dx.doi.org/10.1007/s11096-015-0240-y>
86. Haberer JE, Musiimenta A, Atukunda EC, et al. Short message service (SMS) reminders and real-time adherence monitoring improve antiretroviral therapy adherence in rural Uganda. *AIDS* 2016;30(8):1295-300. doi: 10.1097/qad.0000000000001021 [published Online First: 2016/01/14]
87. Jeffries C, Ross P, Matoff-Stepp S, et al. Ucare4life: Mobile texting to improve HIV care continuum outcomes for minority youth. *Topics in Antiviral Medicine* 2016;24 (E-1):427.



- 1  
2  
3  
4  
5  
6  
7  
8  
9  
10  
11  
12  
13  
14  
15  
16  
17  
18  
19  
20  
21  
22  
23  
24  
25  
26  
27  
28  
29  
30  
31  
32  
33  
34  
35  
36  
37  
38  
39  
40  
41  
42  
43  
44  
45  
46  
47  
48  
49  
50  
51  
52  
53  
54  
55  
56  
57  
58  
59  
60
88. Joseph Davey D, Nhavoto JA, Augusto O, et al. SMSaude: Evaluating Mobile Phone Text Reminders to Improve Retention in HIV Care for Patients on Antiretroviral Therapy in Mozambique. *J Acquir Immune Defic Syndr* 2016;73(2):e23-30. doi: 10.1097/qai.0000000000001115 [published Online First: 2016/09/16]
89. Kampman C, Koedijk F, Driessen-Hulshof H, et al. Retesting young STI clinic visitors with urogenital Chlamydia trachomatis infection in the Netherlands; response to a text message reminder and reinfection rates: a prospective study with historical controls. *Sex Transm Infect* 2016;92(2):124-9. doi: 10.1136/sextrans-2015-052115 [published Online First: 2015/09/26]
90. Kassaye SG, Ong'ech J, Sirengo M, et al. Cluster-Randomized Controlled Study of SMS Text Messages for Prevention of Mother-to-Child Transmission of HIV in Rural Kenya. *AIDS research and treatment* 2016;2016:1289328. doi: 10.1155/2016/1289328 [published Online First: 2017/01/06]
91. McIver R, Dyda A, McNulty AM, et al. Text message reminders do not improve hepatitis B vaccination rates in an Australian sexual health setting. *Journal of the American Medical Informatics Association : JAMIA* 2016;23(e1):e88-92. doi: 10.1093/jamia/ocv145 [published Online First: 2015/10/27]
92. Njuguna N, Ngure K, Mugo N, et al. The Effect of Human Immunodeficiency Virus Prevention and Reproductive Health Text Messages on Human Immunodeficiency Virus Testing Among Young Women in Rural Kenya: A Pilot Study. *Sex Transm Dis* 2016;43(6):353-9. doi: 10.1097/olq.0000000000000450 [published Online First: 2016/05/21]
93. Nsagha DS, Lange I, Fon PN, et al. A Randomized Controlled Trial on the Usefulness of Mobile Text Phone Messages to Improve the Quality of Care of HIV and AIDS Patients in Cameroon. *Open AIDS J* 2016;10:93-103. doi: 10.2174/1874613601610010093 [published Online First: 2016/09/02]
94. Nyatsanza F, McSorley J, Murphy S, et al. 'It's all in the message': the utility of personalised short message service (SMS) texts to remind patients at higher risk of STIs and HIV to reattend for testing-a repeat before and after study. *Sex Transm Infect* 2016;92(5):393-5. doi: 10.1136/sextrans-2015-052216 [published Online First: 2015/12/17]
95. Rana AI, van den Berg JJ, Lamy E, et al. Using a Mobile Health Intervention to Support HIV Treatment Adherence and Retention Among Patients at Risk for Disengaging with Care. *AIDS Patient Care STDS* 2016;30(4):178-84. doi: 10.1089/apc.2016.0025 [published Online First: 2016/03/31]
96. Rand CM, Vincelli P, Goldstein NP, et al. Effects of Phone and Text Message Reminders on Completion of the Human Papillomavirus Vaccine Series. *J Adolesc Health* 2017;60(1):113-19. doi: 10.1016/j.jadohealth.2016.09.011 [published Online First: 2016/11/12]
97. Coleman J, Bohlin KC, Thorson A, et al. Effectiveness of an SMS-based maternal mHealth intervention to improve clinical outcomes of HIV-positive pregnant women. *AIDS care* 2017:1-8. doi: 10.1080/09540121.2017.1280126 [published Online First: 2017/01/22]
98. Garofalo R, Kuhns LM, Hotton A, et al. A Randomized Controlled Trial of Personalized Text Message Reminders to Promote Medication Adherence Among HIV-Positive Adolescents and Young Adults. *AIDS Behav* 2016;20(5):1049-59. doi: 10.1007/s10461-015-1192-x [published Online First: 2015/09/13]
99. Georgette N, Siedner MJ, Zanoni B, et al. The Acceptability and Perceived Usefulness of a Weekly Clinical SMS Program to Promote HIV Antiretroviral Medication Adherence in KwaZulu-Natal, South Africa. *AIDS Behav* 2016;20(11):2629-38. doi: 10.1007/s10461-016-1287-z [published Online First: 2016/10/21]
100. Dowshen N, Lee S, Matty Lehman B, et al. IknowUshould2: Feasibility of a Youth-Driven Social Media Campaign to Promote STI and HIV Testing Among Adolescents in Philadelphia. *AIDS Behav* 2015;19 Suppl 2:106-11. doi: 10.1007/s10461-014-0991-9 [published Online First: 2015/01/08]

- 1  
2  
3  
4  
5  
6  
7  
8  
9  
10  
11  
12  
13  
14  
15  
16  
17  
18  
19  
20  
21  
22  
23  
24  
25  
26  
27  
28  
29  
30  
31  
32  
33  
34  
35  
36  
37  
38  
39  
40  
41  
42  
43  
44  
45  
46  
47  
48  
49  
50  
51  
52  
53  
54  
55  
56  
57  
58  
59  
60
101. Jones M, Aderogba K, Drunis L. Providing rapid HIV testing in their homes for men who have sex with men, recruited via social media. *HIV Medicine* 2015;16(Suppl 2):50-51.
  102. Kurth AE, Spielberg F, Cleland CM, et al. Computerized counseling reduces HIV-1 viral load and sexual transmission risk: findings from a randomized controlled trial. *J Acquir Immune Defic Syndr* 2014;65(5):611-20. doi: 10.1097/QAI.0000000000000100 [published Online First: 2014/01/05]
  103. Lelutiu-Weinberger C, Pachankis JE, Gamarel KE, et al. Feasibility, Acceptability, and Preliminary Efficacy of a Live-Chat Social Media Intervention to Reduce HIV Risk Among Young Men Who Have Sex With Men. *AIDS Behav* 2015;19(7):1214-27. doi: 10.1007/s10461-014-0911-z [published Online First: 2014/09/27]
  104. Perera AI, Thomas MG, Moore JO, et al. Effect of a smartphone application incorporating personalized health-related imagery on adherence to antiretroviral therapy: a randomized clinical trial. *AIDS Patient Care STDS* 2014;28(11):579-86. doi: 10.1089/apc.2014.0156 [published Online First: 2014/10/08]
  105. Jones K, Baldwin KA, Lewis PR. The potential influence of a social media intervention on risky sexual behavior and Chlamydia incidence. *J Community Health Nurs* 2012;29(2):106-20. doi: 10.1080/07370016.2012.670579 [published Online First: 2012/04/28]
  106. Jones R, Hoover DR, Lacroix LJ. A randomized controlled trial of soap opera videos streamed to smartphones to reduce risk of sexually transmitted human immunodeficiency virus (HIV) in young urban African American women. *Nurs Outlook* 2013;61(4):205-15 e3. doi: S0029-6554(13)00061-4 [pii] 10.1016/j.outlook.2013.03.006 [published Online First: 2013/06/08]
  107. Naar-King S, Outlaw AY, Sarr M, et al. Motivational Enhancement System for Adherence (MESA): pilot randomized trial of a brief computer-delivered prevention intervention for youth initiating antiretroviral treatment. *J Pediatr Psychol* 2013;38(6):638-48. doi: jss132 [pii] 10.1093/jpepsy/jss132 [published Online First: 2013/01/30]
  108. Elliot E, Rossi M, McCormack S, et al. Identifying undiagnosed HIV in men who have sex with men (MSM) by offering HIV home sampling via online gay social media: a service evaluation. *Sex Transm Infect* 2016;92(6):470-3. doi: 10.1136/sextrans-2015-052090 [published Online First: 2016/05/26]
  109. Garrett R, Menacho L, Young SD. Ethical Issues in Using Social Media to Deliver an HIV Prevention Intervention: Results from the HOPE Peru Study. *Prevention science : the official journal of the Society for Prevention Research* 2017;18(2):225-32. doi: 10.1007/s11121-016-0739-z [published Online First: 2016/12/10]
  110. Himelhoch S, Kreyenbuhl J, Palmer-Bacon J, et al. Pilot feasibility study of Heart2HAART: a smartphone application to assist with adherence among substance users living with HIV. *AIDS care* 2017:1-7. doi: 10.1080/09540121.2016.1259454 [published Online First: 2017/01/04]
  111. Huang E, Marlin RW, Young SD, et al. Using Grindr, a Smartphone Social-Networking Application, to Increase HIV Self-Testing Among Black and Latino Men Who Have Sex With Men in Los Angeles, 2014. *AIDS education and prevention : official publication of the International Society for AIDS Education* 2016;28(4):341-50. doi: 10.1521/aeap.2016.28.4.341 [published Online First: 2016/07/20]
  112. Jeon JH. Evaluation of a smartphone application for self-care performance of patients with chronic hepatitis B: A randomized controlled trial. *Applied nursing research : ANR* 2016;32:182-89. doi: 10.1016/j.apnr.2016.07.011 [published Online First: 2016/12/15]
  113. Polilli E, Sozio F, Di Stefano P, et al. Web-Based HIV Testing in Abruzzo, Italy: Analysis of 15-Month Activity Results. *AIDS Patient Care STDS* 2016;30(10):471-75. doi: 10.1089/apc.2016.0082
  114. Przybyla SM, Eliseo-Arras RK, Krawiec G, et al. Feasibility and Acceptability of a Smartphone App for Daily Reports of Substance Use and Antiretroviral Therapy Adherence among HIV-Infected

- Adults. *AIDS research and treatment* 2016;2016:9510172. doi: 10.1155/2016/9510172 [published Online First: 2016/09/10]
115. Rhodes SD, McCoy TP, Tanner AE, et al. Using Social Media to Increase HIV Testing Among Gay and Bisexual Men, Other Men Who Have Sex With Men, and Transgender Persons: Outcomes From a Randomized Community Trial. *Clinical infectious diseases : an official publication of the Infectious Diseases Society of America* 2016;62(11):1450-3. doi: 10.1093/cid/ciw127 [published Online First: 2016/03/17]
116. Rosengren AL, Huang E, Daniels J, et al. Feasibility of using Grindr™ to distribute HIV self-test kits to men who have sex with men in Los Angeles, California. *Sexual health* 2016 doi: 10.1071/sh15236 [published Online First: 2016/05/23]
117. Solorio R, Norton-Shelpuk P, Forehand M, et al. Tu Amigo Pepe: Evaluation of a Multi-media Marketing Campaign that Targets Young Latino Immigrant MSM with HIV Testing Messages. *AIDS Behav* 2016;20(9):1973-88. doi: 10.1007/s10461-015-1277-6 [published Online First: 2016/02/07]
118. Talal AH, Andrews P, McLeod A, et al. Telemedicine-based Hepatitis C Virus (HCV) management for individuals on opioid agonist treatment (OAT). *Hepatology* 2016;63 (1 Supplement 1):475A.
119. Henwood R, Patten G, Barnett W, et al. Acceptability and use of a virtual support group for HIV-positive youth in Khayelitsha, Cape Town using the MXit social networking platform. *AIDS care* 2016;28(7):898-903. doi: 10.1080/09540121.2016.1173638 [published Online First: 2016/04/22]
120. Brayboy LM, Sepolen A, Mezoian T, et al. Girl Talk: A Smartphone Application to Teach Sexual Health Education to Adolescent Girls. *J Pediatr Adolesc Gynecol* 2017;30(1):23-28. doi: 10.1016/j.jpag.2016.06.011 [published Online First: 2016/07/10]
121. Horvath KJ, Oakes JM, Rosser BR, et al. Feasibility, acceptability and preliminary efficacy of an online peer-to-peer social support ART adherence intervention. *AIDS Behav* 2013;17(6):2031-44. doi: 10.1007/s10461-013-0469-1 [published Online First: 2013/04/05]
122. Gotz HM, van Rooijen MS, Vriens P, et al. Initial evaluation of use of an online partner notification tool for STI, called 'suggest a test': a cross sectional pilot study. *Sex Transm Infect* 2014;90(3):195-200. doi: sextrans-2013-051254 [pii] 10.1136/sextrans-2013-051254 [published Online First: 2014/01/07]
123. Friedman AL, Brookmeyer KA, Kachur RE, et al. An assessment of the GYT: Get Yourself Tested campaign: an integrated approach to sexually transmitted disease prevention communication. *Sex Transm Dis* 2014;41(3):151-7. doi: 10.1097/OLQ.0000000000001000007435-201403000-00001 [pii] [published Online First: 2014/02/14]
124. Hightow-Weidman LB, Muessig KE, Pike EC, et al. HealthMpowerment.org: Building Community Through a Mobile-Optimized, Online Health Promotion Intervention. *Health Educ Behav* 2015;42(4):493-9. doi: 1090198114562043 [pii] 10.1177/1090198114562043 [published Online First: 2015/01/16]
125. Dokkum NF, Koekenbier RH, van den Broek IV, et al. Keeping participants on board: increasing uptake by automated respondent reminders in an Internet-based chlamydia screening in the Netherlands. *BMC Public Health* 2012;12:176. doi: 1471-2458-12-176 [pii] 10.1186/1471-2458-12-176 [published Online First: 2012/03/13]
126. Hightow-Weidman L, Beagle S, Pike E, et al. "No one's at home and they won't pick up the phone": using the Internet and text messaging to enhance partner services in North Carolina. *Sex Transm Dis* 2014;41(2):143-8. doi: 10.1097/OLQ.0000000000000087 00007435-201402000-00014 [pii] [published Online First: 2014/01/15]
127. Aronson ID, Cleland CM, Perlman DC, et al. MOBILE SCREENING TO IDENTIFY AND FOLLOW-UP WITH HIGH RISK, HIV NEGATIVE YOUTH. *Journal of mobile technology in medicine* 2016;5(1):9-18. doi: 10.7309/jmtm.5.1.3 [published Online First: 2016/04/26]
128. Hirsch-Moverman Y, Daftary A, Yuengling KA, et al. Using mHealth for HIV/TB Treatment Support in Lesotho: Enhancing Patient-Provider Communication in the START Study. *J Acquir*

- 1  
2  
3  
4  
5  
6  
7  
8  
9  
10  
11  
12  
13  
14  
15  
16  
17  
18  
19  
20  
21  
22  
23  
24  
25  
26  
27  
28  
29  
30  
31  
32  
33  
34  
35  
36  
37  
38  
39  
40  
41  
42  
43  
44  
45  
46  
47  
48  
49  
50  
51  
52  
53  
54  
55  
56  
57  
58  
59  
60
- Immune Defic Syndr* 2017;74 Suppl 1:S37-S43. doi: 10.1097/qai.0000000000001202 [published Online First: 2016/12/09]
129. John ME, Samson-Akpan PE, Etowa JB, et al. Enhancing self-care, adjustment and engagement through mobile phones in youth with HIV. *International nursing review* 2016;63(4):555-61. doi: 10.1111/inr.12313 [published Online First: 2016/09/23]
130. Guy R, Hocking J, Wand H, et al. How effective are short message service reminders at increasing clinic attendance? A meta-analysis and systematic review. *Health Serv Res* 2012;47(2):614-32. doi: 10.1111/j.1475-6773.2011.01342.x [published Online First: 2011/11/19]
131. Free C, Phillips G, Galli L, et al. The effectiveness of mobile-health technology-based health behaviour change or disease management interventions for health care consumers: a systematic review. *PLoS Med* 2013;10(1):e1001362. doi: 10.1371/journal.pmed.1001362  
PMEDICINE-D-12-00520 [pii] [published Online First: 2013/01/26]
132. Ershad Sarabi R, Sadoughi F, Jamshidi Orak R, et al. The Effectiveness of Mobile Phone Text Messaging in Improving Medication Adherence for Patients with Chronic Diseases: A Systematic Review. *Iranian Red Crescent medical journal* 2016;18(5):e25183. doi: 10.5812/ircmj.25183 [published Online First: 2016/07/21]
133. Finitis DJ, Pellowski JA, Huedo-Medina TB, et al. Visual analogue scale (VAS) measurement of antiretroviral adherence in people living with HIV (PLWH): a meta-analysis. *Journal of behavioral medicine* 2016;39(6):1043-55. doi: 10.1007/s10865-016-9770-6 [published Online First: 2016/08/03]
134. Kanters S, Park JJ, Chan K, et al. Interventions to improve adherence to antiretroviral therapy: a systematic review and network meta-analysis. *The lancet HIV* 2017;4(1):e31-e40. doi: 10.1016/s2352-3018(16)30206-5 [published Online First: 2016/11/20]
135. Mayer JE, Fontelo P. Meta-analysis on the effect of text message reminders for HIV-related compliance. *AIDS care* 2016:1-9. doi: 10.1080/09540121.2016.1214674 [published Online First: 2016/08/02]
136. Thakkar J, Kurup R, Laba TL, et al. Mobile telephone text messaging for medication adherence in chronic disease a meta-analysis. *JAMA Intern Med* 2016;176(3):340-49. doi: 10.1001/jamainternmed.2015.7667
137. Mbuagbaw L, Mursleen S, Lytvyn L, et al. Mobile phone text messaging interventions for HIV and other chronic diseases: an overview of systematic reviews and framework for evidence transfer. *BMC Health Serv Res* 2015;15:33. doi: 10.1186/s12913-014-0654-6  
s12913-014-0654-6 [pii] [published Online First: 2015/01/23]
138. Muessig KE, Nekkanti M, Bauermeister J, et al. A Systematic Review of Recent Smartphone, Internet and Web 2.0 Interventions to Address the HIV Continuum of Care. *Curr Hiv/Aids Rep* 2015;12(1):173-90. doi: 10.1007/s11904-014-0239-3
139. Gabarron E, Wynn R. Use of social media for sexual health promotion: a scoping review. *Global health action* 2016;9:32193. doi: 10.3402/gha.v9.32193 [published Online First: 2016/09/22]
140. Chavez NR, Shearer LS, Rosenthal SL. Use of digital media technology for primary prevention of STIs/HIV in youth. *J Pediatr Adolesc Gynecol* 2014;27(5):244-57. doi: 10.1016/j.jpag.2013.07.008 [published Online First: 2013/12/18]
141. Barello S, Triberti S, Graffigna G, et al. eHealth for Patient Engagement: A Systematic Review. *Front Psychol* 2015;6:2013. doi: 10.3389/fpsyg.2015.02013 [published Online First: 2016/01/19]
142. Finitis DJ, Pellowski JA, Johnson BT. Text Message Intervention Designs to Promote Adherence to Antiretroviral Therapy (ART): A Meta-Analysis of Randomized Controlled Trials. *PLoS ONE* 2014;9(2) doi: e88166  
10.1371/journal.pone.0088166
143. Fletcher WR, Fletcher WS. Chapter 8: Treatment. *Clinical Epidemiology: The Essentials*. 4th ed. Baltimore: Lippincott Williams & Wilkins 2005:141.



1  
2  
3  
4  
5  
6  
7  
8  
9  
10  
11  
12  
13  
14  
15  
16  
17  
18  
19  
20  
21  
22  
23  
24  
25  
26  
27  
28  
29  
30  
31  
32  
33  
34  
35  
36  
37  
38  
39  
40  
41  
42  
43  
44  
45  
46  
47  
48  
49  
50  
51  
52  
53  
54  
55  
56  
57  
58  
59  
60

144. Agarwal S, LeFevre AE, Lee J, et al. Guidelines for reporting of health interventions using mobile phones: mobile health (mHealth) evidence reporting and assessment (mERA) checklist. *BMJ* 2016;352:i1174. [published Online First: 2016/03/19]

For peer review only

1  
2  
3  
4  
5  
6  
7  
8  
9  
10  
11  
12  
13  
14  
15  
16  
17  
18  
19  
20  
21  
22  
23  
24  
25  
26  
27  
28  
29  
30  
31  
32  
33  
34  
35  
36  
37  
38  
39  
40  
41  
42  
43  
44  
45  
46  
47  
48  
49  
50  
51  
52  
53  
54  
55  
56  
57  
58  
59  
60

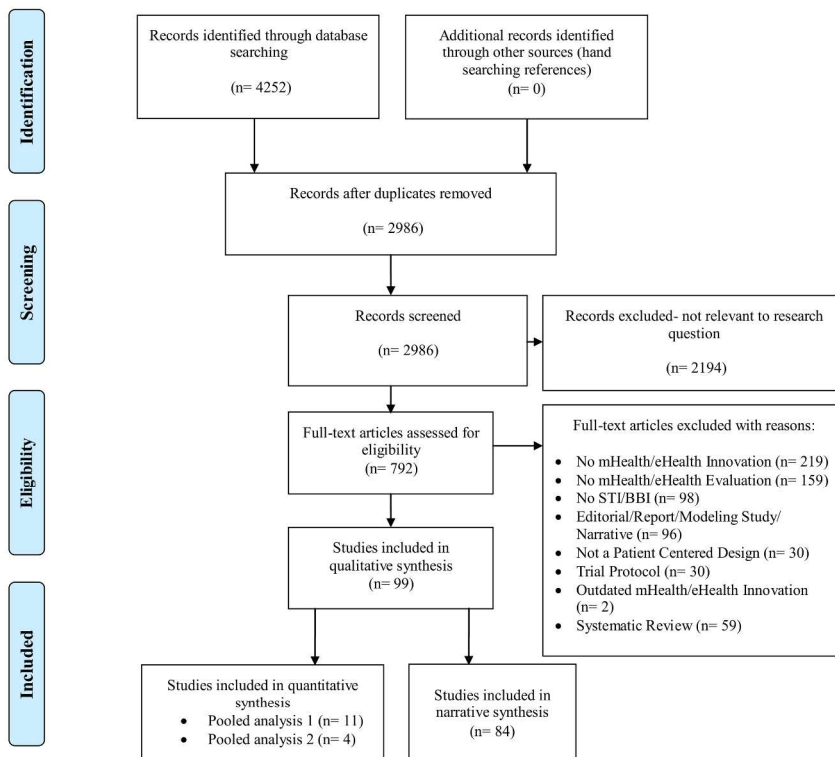

Figure 1: PRISMA flow diagram

215x279mm (300 x 300 DPI)

1  
2  
3  
4  
5  
6  
7  
8  
9  
10  
11  
12  
13  
14  
15  
16  
17  
18  
19  
20  
21  
22  
23  
24  
25  
26  
27  
28  
29  
30  
31  
32  
33  
34  
35  
36  
37  
38  
39  
40  
41  
42  
43  
44  
45  
46  
47  
48  
49  
50  
51  
52  
53  
54  
55  
56  
57  
58  
59  
60

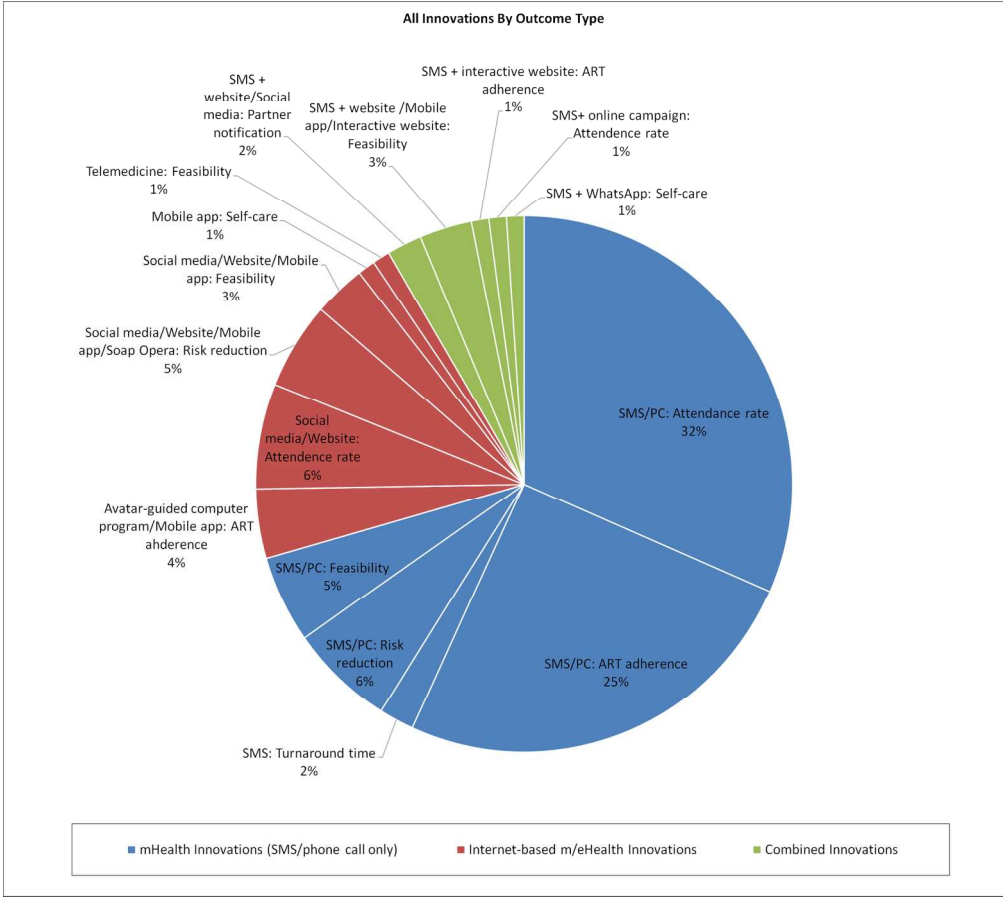

Figure 2: All innovations by outcome

170x152mm (300 x 300 DPI)

only

1  
2  
3  
4  
5  
6  
7  
8  
9  
10  
11  
12  
13  
14  
15  
16  
17  
18  
19  
20  
21  
22  
23  
24  
25  
26  
27  
28  
29  
30  
31  
32  
33  
34  
35  
36  
37  
38  
39  
40  
41  
42  
43  
44  
45  
46  
47  
48  
49  
50  
51  
52  
53  
54  
55  
56  
57  
58  
59  
60

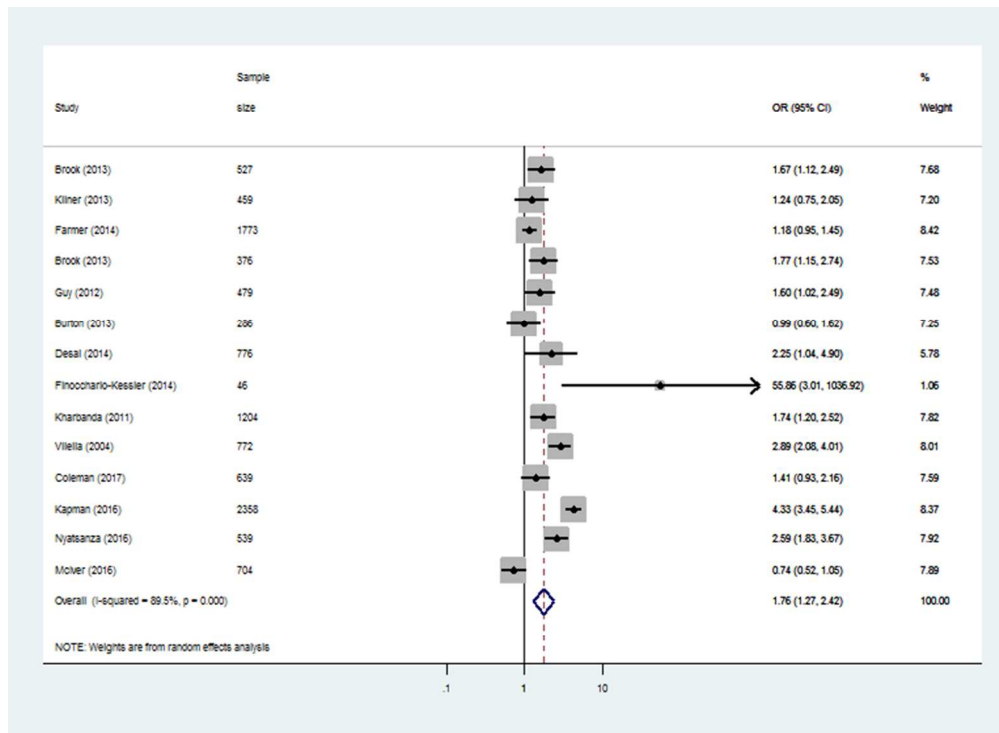

Figure 3A: Sub-group analysis pooled OR for attendance

101x74mm (300 x 300 DPI)

1  
2  
3  
4  
5  
6  
7  
8  
9  
10  
11  
12  
13  
14  
15  
16  
17  
18  
19  
20  
21  
22  
23  
24  
25  
26  
27  
28  
29  
30  
31  
32  
33  
34  
35  
36  
37  
38  
39  
40  
41  
42  
43  
44  
45  
46  
47  
48  
49  
50  
51  
52  
53  
54  
55  
56  
57  
58  
59  
60

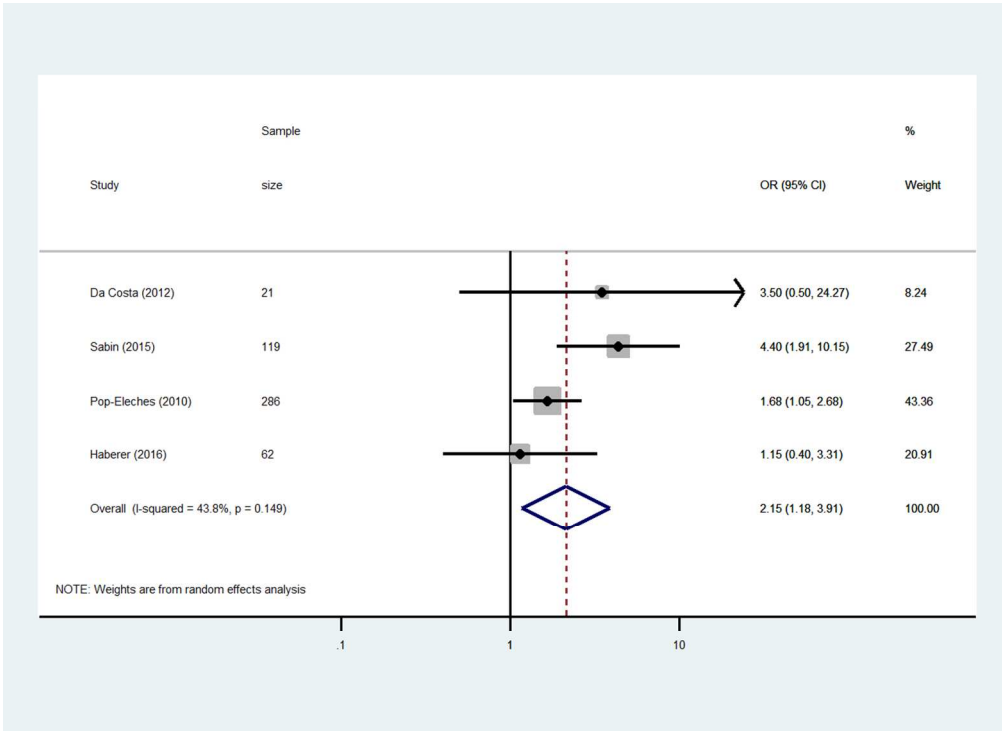

Figure 3B: Sub-group analysis pooled OR for adherence

108x79mm (300 x 300 DPI)

Review only

## Appendix 1: Search Strategy.

|                                                                                                                                                                                                                                                                                                                                                                                                                                                                                                                            |                                                                                                                                                                                                                                                                                                                                                                                                                                                                                                                                                                                                                                                                                                                                                                                                                                                                                                                                                                                                                                                                                                                                                                                                                                                                                                                                                                                                                                                                                                                                                                                                                                                                                                                                                                                                                                                                                                                                                             |
|----------------------------------------------------------------------------------------------------------------------------------------------------------------------------------------------------------------------------------------------------------------------------------------------------------------------------------------------------------------------------------------------------------------------------------------------------------------------------------------------------------------------------|-------------------------------------------------------------------------------------------------------------------------------------------------------------------------------------------------------------------------------------------------------------------------------------------------------------------------------------------------------------------------------------------------------------------------------------------------------------------------------------------------------------------------------------------------------------------------------------------------------------------------------------------------------------------------------------------------------------------------------------------------------------------------------------------------------------------------------------------------------------------------------------------------------------------------------------------------------------------------------------------------------------------------------------------------------------------------------------------------------------------------------------------------------------------------------------------------------------------------------------------------------------------------------------------------------------------------------------------------------------------------------------------------------------------------------------------------------------------------------------------------------------------------------------------------------------------------------------------------------------------------------------------------------------------------------------------------------------------------------------------------------------------------------------------------------------------------------------------------------------------------------------------------------------------------------------------------------------|
| Search #1                                                                                                                                                                                                                                                                                                                                                                                                                                                                                                                  | "HIV Infections"[Mesh] OR "HIV" [MeSH] OR "human immunodeficiency virus"[tiab] OR "human immuno deficiency virus"[tiab] OR "human immune deficiency virus"[tiab] OR "human immunodeficiency virus"[tiab] OR "aids"[tiab] OR "acquired immunodeficiency syndrome"[tiab] OR "acquired immunodeficiency syndromes"[tiab] OR "acquired immuno deficiency syndrome"[tiab] OR "acquired immune deficiency syndromes"[tiab] OR "acquired immune deficiency syndromes"[tiab] OR "acquired immunodeficiency syndrome"[tiab] OR "acquired immunodeficiency syndromes"[tiab]                                                                                                                                                                                                                                                                                                                                                                                                                                                                                                                                                                                                                                                                                                                                                                                                                                                                                                                                                                                                                                                                                                                                                                                                                                                                                                                                                                                           |
| Search #2                                                                                                                                                                                                                                                                                                                                                                                                                                                                                                                  | "mHealth" [tiab] OR "telemedicine"[MeSH] OR telemedicine[tiab] OR eHealth[MeSH] OR ehealth[tiab] OR "mobile health" [tiab] OR "mobile technology"[tiab] OR "app"[tiab] OR "apps"[tiab] OR "mobile applications" OR social medi*[tiab] OR cell phone* [tiab] OR cellphone*[tiab] OR "cellular phone"[mesh] OR cellular phone*[tiab] OR smartphone*[tiab] OR smart phone*[tiab] OR mobile phone[tiab] OR mobile device*[tiab] OR cellular telephone*[tiab] OR mobile telephone*[tiab] OR text messag*[tiab] OR texting[tiab] OR texted[tiab] OR SMS[tiab] OR MMS[tiab] OR multimedia messag*[tiab] OR short messag*[tiab] OR "computers, handheld"[mesh] OR personal digital assistant*[tiab]                                                                                                                                                                                                                                                                                                                                                                                                                                                                                                                                                                                                                                                                                                                                                                                                                                                                                                                                                                                                                                                                                                                                                                                                                                                                 |
| Search #3 [1,2]<br>References<br>1.Ferreira A, Young T, Mathews C, Zunza M, Low N. Strategies for partner notification for sexually transmitted infections, including HIV. Cochrane Database of Systematic Reviews 2013, Issue 10. Art. No.: CD002843. DOI: 10.1002/14651858.CD002843.pub2<br>2.Obiero J, Mwethera PG, Wiysonge CS. Topical microbicides for prevention of sexually transmitted infections. Cochrane Database of Systematic Reviews 2012, Issue 6. Art. No.: CD007961. DOI: 10.1002/14651858.CD007961.pub2 | sexually transmitted infections[mh] OR sexually transmitted disease*[tiab] OR sexually transmissible disease*[tiab] OR sexually transmitted infection*[tiab] OR sexually transmissible infection*[tiab] OR sexually transmitted infectious disease*[tiab] OR sexually transmissible infectious disease*[tiab] OR sexually transmitted disorder*[tiab] OR sexually transmissible disorder*[tiab] OR STI[tiab] OR STIs[tiab] OR STD[tiab] OR STIs[tiab] OR venereal disease*[tiab] OR venereal infection*[tiab] OR venereal disorder*[tiab] OR genital herpes[tiab] OR herpes genitalis[mh] OR herpes genitalis[tiab] OR genital infection*[tiab] OR genital disorder*[tiab] OR herpes simplex[tiab] OR herpes virus[tiab] OR HSV-1[tiab] OR HSV-2[tiab] OR chancroid[mh] OR chancroid* [tiab] OR haemophilus ducreyi[tiab] OR chlamydia infection*[tiab] OR chlamydia trachomatis[mh] OR chlamydia trachomatis[tiab] OR gonorrhoea[mh] OR gonorrhoea*[tiab] OR gonorrhoea*[tiab] OR syphilis[mh] OR syphilis[tiab] OR cuminat[tiab] OR condylomata lata[tiab] OR chancre*[tiab] OR lymphogranuloma venereum[mh] OR lymphogranuloma venereum[tiab] OR granuloma Inguinale[mh] OR granuloma inguinale[tiab] OR donovania[tiab] OR donovanosis[tiab] OR calymmatobacterium[mh] OR calymmatobacterium granulomatis[tiab] OR klebsiella granulomatis[tiab] OR klebsiella granulomatis[tiab] OR treponema pallidum[mh] OR treponema pallidum[tiab] OR genital wart*[tiab] OR venereal wart*[tiab] OR condylomata cuminate[mh] OR human papillomavirus 6[mh] OR hpv-6[tiab] OR hpv-11[tiab] OR hpv6[tiab] OR human papillomavirus[tiab] OR hepatitis b[mh] OR hepatitis b[tiab] OR trichomonas vaginitis[mh] OR trichomonas vaginitis[tiab] OR genital ulcer*[tiab] OR anogenital ulcer*[tiab] OR anorectal ulcer*[tiab] OR anorectal ulcer*[tiab] OR penile ulcer*[tiab] OR blood-born pathogen*[tiab] OR blood-borne infection*[tiab] OR blood-borne virus*[tiab] |
| Search #4                                                                                                                                                                                                                                                                                                                                                                                                                                                                                                                  | #1 OR #3                                                                                                                                                                                                                                                                                                                                                                                                                                                                                                                                                                                                                                                                                                                                                                                                                                                                                                                                                                                                                                                                                                                                                                                                                                                                                                                                                                                                                                                                                                                                                                                                                                                                                                                                                                                                                                                                                                                                                    |
| Search #5                                                                                                                                                                                                                                                                                                                                                                                                                                                                                                                  | #2 AND #4                                                                                                                                                                                                                                                                                                                                                                                                                                                                                                                                                                                                                                                                                                                                                                                                                                                                                                                                                                                                                                                                                                                                                                                                                                                                                                                                                                                                                                                                                                                                                                                                                                                                                                                                                                                                                                                                                                                                                   |

## Appendix 2: Abstraction table.

| Combined Innovations                         | Author               | Study Design                                   | Participants/<br>Country                                  | STBBI             | Intervention                                                                                          | Measure/Metric                                                                                                                                                                               | Results (MD=Mean difference, RR=risk ratio, IRR=incidence rate ratio, HR=hazard ratio, SD= standard deviation, 95% CI when presented. M=months, W=weeks)                                                                                                                                                                                                                                                                                                                        |
|----------------------------------------------|----------------------|------------------------------------------------|-----------------------------------------------------------|-------------------|-------------------------------------------------------------------------------------------------------|----------------------------------------------------------------------------------------------------------------------------------------------------------------------------------------------|---------------------------------------------------------------------------------------------------------------------------------------------------------------------------------------------------------------------------------------------------------------------------------------------------------------------------------------------------------------------------------------------------------------------------------------------------------------------------------|
| Online campaign + SMS + TV.                  | Friedman 2014        | Quasi-experimental: HxCtrl w/ population data. | ≤25 yrs, USA. n=N/A                                       | HIV, CT, GC       | GetYourselfTested: TV campaign w/ website & SMS service for STI info & clinic locator.                | ATT testing: Attendance rate.<br>Acceptability: Number of followers.<br>Feasibility: Referral rate.                                                                                          | 41.2% more CT tests in 2010 vs. 2008, 90.5% more GC tests, and 190.3% more HIV tests.<br>4477 FB followers and 1994 Twitter followers at yr 2.<br>83,404 referrals using clinic locator in yr1. 61,119 in yr2.                                                                                                                                                                                                                                                                  |
| Interactive website + SMS + cash incentives. | Horvath 2013         | RCT                                            | HIV+ Gay/Bi-sexual men 18+ yrs, USA. n=67(Int) n=57(Ctrl) | HIV               | Online self-monitoring system w/ interactive interface + optional SMS reminders +\$25 gift card draw. | ART in PVLA: Self-report.<br>[Difference scores: DS = FU-baseline]<br>ART in PVLA: Self-report.<br>ART in PVLA: Self-report.<br>Acceptability: Self-report.<br>Feasibility: Completion rate. | No difference. (DS=0.54, SD=25.2 vs. DS=-3.2, SD=24.5; t(107)=1.79, p=0.43) / No impact.<br>Increased adherence in drug users (DS= 7.1, SD= 22.1 vs. DS= -24, SD= 30.5; t(17)=2.52, p=0.02) / Effective.<br>Trend to taking meds within 2hrs of scheduled dose. DS=6.6, SD=29.3 vs. DS=-3, SD=29.6; t(105)=1.68, p=0.1 / No impact.<br>Mean score = 5.7 on 7-point Likert Scale for satisfaction / Highly acceptable.<br>Completion rate 88% vs. 93% in Ctrl / Highly feasible. |
| Website + SMS                                | Gotz 2014            | Cross-sectional study.                         | STI index patients at clinic, NLD. n=988                  | HIV, CT, GC, syph | Suggestatest.nl: online partner notification via SMS/email.                                           | PN: % partners notified.                                                                                                                                                                     | 14% notifications via SAT. 505 notifications sent (84% by SMS, 15% by email). 56% read notification. 20% visited one of 2 STI clinics.                                                                                                                                                                                                                                                                                                                                          |
| Social media + SMS.                          | Hightow-Weidman 2014 | Quasi-experimental: HxCtrl.                    | HIV+ or syphilis+ patients, USA. n=362(Int) n=133(HxCtrl) | HIV, syphilis     | Notification on social networking sites + SMS                                                         | PN: % partners notified.                                                                                                                                                                     | 63.5% of contacts notified via internet in 2011 vs. 26% in 2010.                                                                                                                                                                                                                                                                                                                                                                                                                |
| PC/SMS/MMS + WhatsApp messages               | John 2016            | UnCtrlled trial.                               | HIV+ non-disclosed, 15-29 yrs, NGA. n=19                  | HIV               | Weekly counselling, educational & motivational calls, SMS/MMS and WhatsApp messages over 3M.          | Self-care: Self-report.                                                                                                                                                                      | Significant increase in self-care performance at 6M (p=0.002)/ Effective.                                                                                                                                                                                                                                                                                                                                                                                                       |
| Interactive website + SMS                    | Hightow-Weidman 2015 | Feasibility study.                             | Black MSM & transwomen 18-30 yrs, USA. n=15               | HIV               | HealthMpowerment.org: online community networking Int to reduce STI risk + health promotion messages. | Acceptability: Self-report.<br>Feasibility: Retention rate.                                                                                                                                  | 86.7%-100% strongly agreed w/ acceptability questions / Highly acceptable.<br>100% retention rate. 7/15 participants used the site 1W after study ended / Highly feasible.                                                                                                                                                                                                                                                                                                      |
| Mobile app + SMS                             | Hirsch-Moverman 2017 | Feasibility study.                             | ≥18yrs, HIV+/TB, LSO. n=171                               | HIV/TB            | CommCare application used to automatically send SMS medication reminders over 29M                     | Acceptability: Self-report.                                                                                                                                                                  | 41.9% think SMS facilitated adherence to TB /ART medication / Less acceptable.                                                                                                                                                                                                                                                                                                                                                                                                  |

|   |                         |              |                   |                                                   |     |                                                                              |                               |                                                                                                                                                                          |
|---|-------------------------|--------------|-------------------|---------------------------------------------------|-----|------------------------------------------------------------------------------|-------------------------------|--------------------------------------------------------------------------------------------------------------------------------------------------------------------------|
| 1 | <b>Mobile app + SMS</b> | Aronson 2016 | Feasibility study | 18-24 yrs, USA.<br>n=100                          | HIV | App assessing risk and sending SMS to encourage re-testing of HIV negatives. | Feasibility: Completion rate  | 98/100 completed the app process/ Highly feasible<br>30/100 accepted to receive HIV test<br>21/30 accepted to receive SMS<br>1/21 re-tested after 90 days window period. |
| 2 |                         |              |                   |                                                   |     |                                                                              |                               |                                                                                                                                                                          |
| 3 | <b>Website + SMS</b>    | Dokkum 2012  | UnCtrlled trial.  | 16-29 yrs, NLD.<br>n=52600(Rd 1)<br>n=41700(Rd 2) | CT  | At-home CT test + SMS/email to return test for analysis.                     | Feasibility: Completion rate. | Higher retesting rates (From 10% w/o reminders to 14% in round 1; from 7% to 10% in round 2) / Less feasible.                                                            |
| 4 |                         |              |                   |                                                   |     |                                                                              |                               |                                                                                                                                                                          |
| 5 |                         |              |                   |                                                   |     |                                                                              |                               |                                                                                                                                                                          |
| 6 |                         |              |                   |                                                   |     |                                                                              |                               |                                                                                                                                                                          |

7 **Note:** Int= intervention; Ctrl= control; HxCtrl= historical control; PB= preventative behaviors (i.e. risk reduction); PN= partner notification; TAT= turnaround time; ATT= attendance rate; ART= ART adherence; NAPs= non-adherent patients; AP= adherent patients; PVLA= Patients with various levels of adherence; TNPs= Treatment naive patients; VL= viral load; CD4= CD4 cell count; PC= phone call; FB= Facebook.

For peer review only

10  
11  
12  
13  
14  
15  
16  
17  
18  
19  
20  
21  
22  
23  
24  
25  
26  
27  
28  
29  
30  
31  
32  
33  
34  
35  
36  
37  
38  
39  
40  
41  
42  
43  
44  
45  
46  
47  
48  
49



| Internet-based eHealth Innovation                                                                              | Author                                            | Study Design                                   | Participants/ Country                                                 | STBBI                 | Intervention                                                                                                                                    | Measure/Metric                                                                                           | Results (MD=Mean difference, RR=risk ratio, IRR=incidence rate ratio, HR=hazard ratio, SD= standard deviation, 95% CI when presented. M=months, W=weeks)                                                                                                                                                                                                                                                                         |
|----------------------------------------------------------------------------------------------------------------|---------------------------------------------------|------------------------------------------------|-----------------------------------------------------------------------|-----------------------|-------------------------------------------------------------------------------------------------------------------------------------------------|----------------------------------------------------------------------------------------------------------|----------------------------------------------------------------------------------------------------------------------------------------------------------------------------------------------------------------------------------------------------------------------------------------------------------------------------------------------------------------------------------------------------------------------------------|
| 1<br>2<br>3<br>4<br>5<br>6<br>7<br>8<br>9<br>10<br>11<br>12<br>13<br>14<br>15<br>16<br>17<br>18<br>19          | Online campaign<br>Downshen 2015                  | Quasi-experimental: HxCtrl w/ population data. | 13-17 yrs, USA. n=1500                                                | HIV, CT, GC, syphilis | IknowUshould2: social-media campaign w/ website for STI info & clinic locator.                                                                  | ATT testing: Attendance rate.<br>Acceptability: Number of followers.                                     | More syphilis tests (18.8% vs. 5.4%; p<0.01) and HIV tests (19.0% vs. 5.4%; p<0.01). No change for CT & GC / Effective.<br>1500+ unique website interactions. 128 FB likes; 46 Twitter followers; 390 Youtube views; 42 Instagram followers.                                                                                                                                                                                     |
| 20<br>21<br>22<br>23<br>24<br>25<br>26<br>27                                                                   | Social media campaign<br>Elliot 2016              | Cross-sectional study.                         | MSM, GBR. n=17361                                                     | HIV                   | Promotion through Gaydar, Grindr, Recon and FB pages to order free postal HIV home sampling kits                                                | ATT testing: Participation rate.<br>Acceptability: Self-report.                                          | 10 323/11 127 (93%) ordered HIV sample kit. 5696/10 323 (55%) returned sample kit within 24M. 82/5696 (1.4%) confirmed new diagnosis and in care.<br>59.7% would recommend to someone expected to test positive (93.8% if expected to negative). 64% clicked for more info on test. / Moderately acceptable.                                                                                                                     |
| 28<br>29<br>30<br>31<br>32<br>33<br>34<br>35<br>36<br>37<br>38<br>39<br>40<br>41<br>42<br>43<br>44<br>45<br>46 | Social media campaign<br>Huang 2016               | Cross-sectional                                | ≥18yrs, Black/African American or Hispanic/Latino MSM, USA. n=122     | HIV                   | Promoting of HIV self-testing for 6W on Grindr + study website to order self-test kit                                                           | ATT testing: Participation rate.<br>Acceptability: Number of followers<br>Feasibility: Completion rate.  | 122 requested tests; 55/57 HIV-, 2/57 HIV+.<br>11 939 unique website visitors; 2.8% click-through rate<br>334 tests requested.<br>122/334 visitors were eligible and completed baseline survey, 81/122 confirmed receiving self test kit, 57/122 completed follow-up survey / Less feasible.                                                                                                                                     |
| 47<br>48<br>49                                                                                                 | Social media campaign<br>Jones 2015               | Cross-sectional study.                         | MSM, GBR. n=305                                                       | HIV                   | Health promotion and offer of rapid at-home testing via FB, Grindr, and Squirt.                                                                 | ATT testing: Participation rate.<br>Acceptability: Number of followers.<br>Feasibility: Completion rate. | 5/5 high risk sexual behavior but tested HIV negative; 1/5 never tested before; 3/5 not tested in many yrs.<br>103 clicked FB survey; 152 approached on Grindr; 50 Squirt contacts.<br>FB: 6/103 completed survey; 3/6 requested HIV test; 2/3 made appointment. Grindr: 20/152 engaged; 6/20 requests for at home test; 3/6 made appointment. Squirt: 3/50 engaged and 0/3 test requests / Less feasible.                       |
|                                                                                                                | Social media campaign<br>Rhodes 2016              | Quasi-experimental.                            | MSM & transgender, USA n=339 (Int) n=286 (Ctrl)                       | HIV                   | Posting info and answering questions on HIV testing on social media sites (Adam4Adam, BlackGayChat, Craigslist, and Gay.com).                   | ATT testing: Self-report.                                                                                | 63.7% of intervention participants reported past 12M HIV testing compared with 42.0% of control.<br>Adjusted OR= 2.9 (1.8-4.7)/ Effective.                                                                                                                                                                                                                                                                                       |
|                                                                                                                | Social media campaign + website<br>Rosengren 2016 | Cross-sectional                                | Black or Hispanic MSM 18+ yrs, USA n=56                               | HIV                   | Promotion of free rapid HIV self-testing kits on Grindr and offer of delivery via study website (kit, voucher or pin for smart vending machine) | ATT testing: Self-report.<br>Feasibility: Completion rate.<br>ART in TNPs: Self-report.                  | All 56 reported testing completion (100%); 2/56 reported positive result and linkage to care (confirmatory testing and ART initiation)<br>4389 visited the website; 333 requested test (i.e. 1 in 13 visitors); 56 completed survey 2W after request/ Less feasible.<br>Higher adherence at 3M & 6M (71.2% vs. 63.9%, d=0.17; 70.3% vs. 66.6%, d=0.09)                                                                           |
|                                                                                                                | Mobile phone application<br>Himelhoch 2016        | RCT                                            | 18-64yrs, history of drug/alcohol use, HIV+, USA. n=19(Int) n=9(Ctrl) | HIV                   | Heart2HAART mobile application for ART adherence                                                                                                | ART in NAPs: Pill count<br>Acceptability: Self-report.<br>Feasibility: Response rate.                    | No significant difference in adherence between intervention and control group (p=0.29), but adherence was 100% in both at 3M / No impact<br>94.3% strongly agreed/agreed Heart2HAART helped them take their medication / Highly acceptable.<br>App was used on avg 21.4, 19.1 and 16.4 times in months 1, 2 and 3. Participants responded to medication prompts on avg 18, 16 and 13 times during months 1,2 and 3 respectively. |

|                                                                |                                        |                         |                             |                                                                                     |     |                                                                                                                           |                                                                                                                                                                              |                                                                                                                                                                                                                                                                                                                                                                                                                                                                                                                                             |
|----------------------------------------------------------------|----------------------------------------|-------------------------|-----------------------------|-------------------------------------------------------------------------------------|-----|---------------------------------------------------------------------------------------------------------------------------|------------------------------------------------------------------------------------------------------------------------------------------------------------------------------|---------------------------------------------------------------------------------------------------------------------------------------------------------------------------------------------------------------------------------------------------------------------------------------------------------------------------------------------------------------------------------------------------------------------------------------------------------------------------------------------------------------------------------------------|
| 1<br>2<br>3<br>4<br>5<br>6<br>7<br>8<br>9<br>10<br>11          | <b>Avatar-guided computer software</b> | Kurth 2014              | RCT                         | HIV+ 18+ yrs, USA. n=120(Int) n=120(Ctrl)                                           | HIV | Audio narrated risk assessment, skill building videos, tailored feedback and printouts vs. computer risk assessment only. | ART in PVLA: VL.<br>ART in PVLA: Self-report.<br>PB: Self-report.<br>Acceptability: Self-report.<br>Feasibility: Retention rate.                                             | Non-significant change. (log10VL= -0.06(-0.4 to -0.3), p=0.74). Significant in subgroup w/ detectable VL at baseline (-0.73(-1.42 to -0.03), p=0.041) / No impact.<br>Increased adherence. (4.71(0.95- 8.48) increase vs. 1.39(6.03 to 3.24) decrease; p=0.046) / Effective.<br>Lower odds of HIV transmission (OR=0.46 (0.25-0.84), p=0.012) / Effective.<br>97% reported ease of use and high privacy; 99% satisfied w/ session length; 75% preferred it over human counsellor / Highly acceptable.<br>87.1% retention / Highly feasible. |
| 12<br>13<br>14<br>15<br>16<br>17                               | <b>Avatar-guided computer program</b>  | Naar-King 2012          | RCT                         | HIV+ 16-24 yrs, USA. n=36(Int) n=40(Ctrl)                                           | HIV | 2-D animated character delivering personalized health feedback vs. character giving nutrition info.                       | ART in TNPs: VL.<br>ART in TNPs: Self-report.<br>Acceptability: Self-report.                                                                                                 | Larger suppression rate. (Cohen's d=0.09 at 3M; d= 0.28 at 6M). Larger drop in VL from baseline (d=0.39 at 3M & d=0.19 at 6M).<br>Higher adherence at 3M & 6M (71.2% vs. 63.9%, d=0.17; 70.3% vs. 66.6%, d=0.09)<br>Mean satisfaction ratings 3.7 out of 4 / Highly acceptable.                                                                                                                                                                                                                                                             |
| 18<br>19<br>20<br>21<br>22<br>23<br>24<br>25<br>26<br>27<br>28 | <b>Mobile phone application</b>        | Perera 2014             | RCT                         | HIV+, NZ. n=17(Int) n=11(Ctrl)                                                      | HIV | ART adherence app w/ medication clock & graphs on disease-state vs. standard app (medication clock only)                  | ART in PVLA: Self-report.<br>ART in PVLA: Pharmacy refills.<br>ART in PVLA: VL.<br>ART in PVLA: Composite score (refills, VL, & self-report).<br>Acceptability: Self-report. | Increased adherence (F(1,23)=5.37, p=0.03) / Effective.<br>No difference. (F(1,25)=1.88, p=0.18) / No impact.<br>Lower VL at 3M (F(1,23)=5.62, p=0.023) / Effective.<br>Increased adherence (53% to 13%, X2(1,15)=6, p=0.03). No change in Ctrl (27% to 27%, X2(1,11)=0.00, p>0.99) / Effective.<br>More satisfying (on 11 point-scale: 5.88 vs. 3.27, p=0.017) and informative (6 vs. 3, p=0.034) at 3M than standard app / Highly acceptable.                                                                                             |
| 29<br>30<br>31<br>32                                           | <b>Mobile app + cash incentive</b>     | Brayboy 2017            | UnCtrlled trial.            | 12-17yrs, USA. n=17                                                                 | STI | GirlTalk mobile phone app to assess knowledge increase                                                                    | PB: Self-report.<br>Acceptability: Self-report.                                                                                                                              | 75.6% to 79% increase in knowledge pre and post app use at 2W. / No impact.<br>94.1% would use the app again/recommend it / Highly acceptable                                                                                                                                                                                                                                                                                                                                                                                               |
| 33<br>34<br>35                                                 | <b>Social media</b>                    | Jones 2012              | Quasi-experimental: HxCtrl. | 15-24 yrs, USA. n=70/896 FB friends                                                 | CT  | Educational FB site addressing safe sexual health.                                                                        | PB: Self-report.                                                                                                                                                             | Condom from 57% to 80%. 54% reduction in CT in ages 15-17 from previous yrs (but 42% less tests done).                                                                                                                                                                                                                                                                                                                                                                                                                                      |
| 36<br>37<br>38<br>39<br>40                                     | <b>Videos vs. SMS</b>                  | Jones 2013              | RCT                         | High-risk urban African-American women 18-29 yrs, USA. n=117(Soap opera) n=121(SMS) | HIV | Weekly soap opera episodes (Love, Sex & Choices) vs. HIV prevention SMS.                                                  | PB: Self-report.<br>Acceptability: Self-report.                                                                                                                              | 18% greater reduction in Int. group, p=0.23 / No impact.<br>78% reduction in risky acts from baseline in Int. group (p<0.001); 72% reduction from baseline in Ctrl (p<0.001)/ Effective<br>97.4% liked the videos / Highly acceptable.                                                                                                                                                                                                                                                                                                      |
| 41<br>42<br>43<br>44<br>45                                     | <b>Social media + video chat</b>       | Lelutiu-Weinberger 2014 | UnCtrlled trial.            | MSM 18-29 yrs, high risk for STI, USA. n=31                                         | HIV | miCHAT: FB chat Int. 8 motivational interviews to reduce HIV risk + CBT training.                                         | PB: Self-report.<br>Acceptability: Self-report.<br>Feasibility: Completion rate.                                                                                             | Decrease in unprotected anal sex acts (3.11 vs. 8.96; p=0.042). Increased knowledge of sexual risk (p=0.01) / Effective.<br>All felt privacy was ensured / Highly acceptable.<br>46% completed baseline assessment + minimum 5 sessions / Less feasible.                                                                                                                                                                                                                                                                                    |

|    |                                                         |               |                    |                                                           |                         |                                                                                                                                                                    |                                                                |                                                                                                                                                                                                                                                                        |
|----|---------------------------------------------------------|---------------|--------------------|-----------------------------------------------------------|-------------------------|--------------------------------------------------------------------------------------------------------------------------------------------------------------------|----------------------------------------------------------------|------------------------------------------------------------------------------------------------------------------------------------------------------------------------------------------------------------------------------------------------------------------------|
| 1  | <b>Social media campaign + website + cash incentive</b> | Solorio 2016  | Feasibility study. | Hispanic MSM, 18-30 yrs, USA<br>n=50                      | HIV                     | Radio & social media-based campaign for 16W to encourage testing & condom use + website w/clinic locator to provide free HIV home testing kits and linkage to care | PB: self-report.<br>Feasibility: Self-report.                  | No significant change in condom use at 16W (26.1% vs. 15.65, OR=1.9 (0.6-5.9))/ No impact.<br>32/50 (64%) requested HIV home testing kit, 28/32 (88%) completed the test/ Moderately feasible.                                                                         |
| 2  |                                                         |               |                    |                                                           |                         |                                                                                                                                                                    |                                                                |                                                                                                                                                                                                                                                                        |
| 3  |                                                         |               |                    |                                                           |                         |                                                                                                                                                                    |                                                                |                                                                                                                                                                                                                                                                        |
| 4  |                                                         |               |                    |                                                           |                         |                                                                                                                                                                    |                                                                |                                                                                                                                                                                                                                                                        |
| 5  |                                                         |               |                    |                                                           |                         |                                                                                                                                                                    |                                                                |                                                                                                                                                                                                                                                                        |
| 6  | <b>Mobile app</b>                                       | Jeon 2016     | RCT.               | Chronic HBV+, 19-60 yrs, KOR<br>n=26 (Int)<br>n=27 (Ctrl) | HBV                     | App to increase disease knowledge, set alarm medication reminders, record lab nutrition & physical activity data, and chat with other users.                       | Self-care: Self-report.<br>Feasibility: Utilisation rate.      | Significantly higher self-care performance in intervention vs. control (t=3.597, p=0.001)/ Effective.<br>Average monthly utilisation rate was 75.1%/ Highly feasible.                                                                                                  |
| 7  |                                                         |               |                    |                                                           |                         |                                                                                                                                                                    |                                                                |                                                                                                                                                                                                                                                                        |
| 8  |                                                         |               |                    |                                                           |                         |                                                                                                                                                                    |                                                                |                                                                                                                                                                                                                                                                        |
| 9  |                                                         |               |                    |                                                           |                         |                                                                                                                                                                    |                                                                |                                                                                                                                                                                                                                                                        |
| 10 |                                                         |               |                    |                                                           |                         |                                                                                                                                                                    |                                                                |                                                                                                                                                                                                                                                                        |
| 11 |                                                         |               |                    |                                                           |                         |                                                                                                                                                                    |                                                                |                                                                                                                                                                                                                                                                        |
| 12 | <b>Social media</b>                                     | Henwood 2016  | Feasibility study. | 12-25 yrs, HIV+, ZAF<br>n=90                              | HIV                     | Use of MXit as support group for HIV+ youth                                                                                                                        | Acceptability: Self-report.<br>Feasibility: Participation rate | 84% would like chat-room to continue / Highly acceptable.<br>33% ever visited MXit chat-room / Less feasible.                                                                                                                                                          |
| 13 |                                                         |               |                    |                                                           |                         |                                                                                                                                                                    |                                                                |                                                                                                                                                                                                                                                                        |
| 14 |                                                         |               |                    |                                                           |                         |                                                                                                                                                                    |                                                                |                                                                                                                                                                                                                                                                        |
| 15 | <b>Mobile app + cash incentive</b>                      | Przybyla 2016 | Feasibility study. | HIV + on ART, 18+ yrs, USA<br>n=27                        | HIV                     | DRUM app to report daily on ART adherence and substance abuse.                                                                                                     | Acceptability: Self-report.<br>Feasibility: Completion rate.   | 84% reported the app was easy to use; 96% were satisfied; 92% would use it in the future/ Highly acceptable.<br>Overall completion rate of daily reports after 2W= 95.3%/ Highly feasible.                                                                             |
| 16 |                                                         |               |                    |                                                           |                         |                                                                                                                                                                    |                                                                |                                                                                                                                                                                                                                                                        |
| 17 |                                                         |               |                    |                                                           |                         |                                                                                                                                                                    |                                                                |                                                                                                                                                                                                                                                                        |
| 18 |                                                         |               |                    |                                                           |                         |                                                                                                                                                                    |                                                                |                                                                                                                                                                                                                                                                        |
| 19 | <b>Telemedicine</b>                                     | Talal 2016    | Feasibility study. | Individuals on opioid agonist tx, USA<br>n=54             | HCV                     | Telemedicine-based medical tx with hepatologist                                                                                                                    | Acceptability: Self-report.<br>Feasibility: Completion rate.   | 88.9% prefer medical tx using telemedicine vs. clinic visit; 100% would recommend it to a friend/ Highly acceptable.<br>54 tested HCV+ over 14M; 81.5% started evaluation/tx; 75% of those given tx have completed it/ Highly feasible.                                |
| 20 |                                                         |               |                    |                                                           |                         |                                                                                                                                                                    |                                                                |                                                                                                                                                                                                                                                                        |
| 21 |                                                         |               |                    |                                                           |                         |                                                                                                                                                                    |                                                                |                                                                                                                                                                                                                                                                        |
| 22 |                                                         |               |                    |                                                           |                         |                                                                                                                                                                    |                                                                |                                                                                                                                                                                                                                                                        |
| 23 | <b>Social media</b>                                     | Garett 2016   | Feasibility study. | 18+yrs, MSM, PER<br>n=102(Int)<br>n=109(Ctrl)             | HIV                     | 12W FB based peer-led intervention to increase HIV testing and prevention behaviour.                                                                               | Acceptability: Self-report.                                    | Intervention group felt they learned more about; where to receive sexual health services (p-value=0.0061), more likely to have safe sex (p-value=0.034) and more likely to get tested for HIV regularly (p-value=0.021) compared to control group / Highly acceptable. |
| 24 |                                                         |               |                    |                                                           |                         |                                                                                                                                                                    |                                                                |                                                                                                                                                                                                                                                                        |
| 25 |                                                         |               |                    |                                                           |                         |                                                                                                                                                                    |                                                                |                                                                                                                                                                                                                                                                        |
| 26 |                                                         |               |                    |                                                           |                         |                                                                                                                                                                    |                                                                |                                                                                                                                                                                                                                                                        |
| 27 | <b>Website</b>                                          | Polilli 2016  | Feasibility study. | Residents of Abruzzo Region, ITA<br>n=3500                | HIV, syphilis, HBV, HCV | Website with STI info, risk calculator, and appointments booking at testing sites.                                                                                 | Feasibility: Completion rate.                                  | 3500 booked an appointment; 3046 (87%) presented for testing within 15M study period/ Highly feasible.                                                                                                                                                                 |
| 28 |                                                         |               |                    |                                                           |                         |                                                                                                                                                                    |                                                                |                                                                                                                                                                                                                                                                        |
| 29 |                                                         |               |                    |                                                           |                         |                                                                                                                                                                    |                                                                |                                                                                                                                                                                                                                                                        |

30 **Note:** Int= intervention; Ctrl= control; HxCtrl= historical control; PB= preventative behaviors (i.e. risk reduction); PN= partner notification; TAT= turnaround time; ATT= attendance rate; ART= ART adherence; NAPs= non-adherent patients; AP= adherent patients; PVLA= Patients with various levels of adherence; TNPs= Treatment naive patients; VL= viral load; CD4= CD4 cell count; PC= phone call; FB= Facebook.

| Basic mHealth Innovation | Author       | Study Design                        | Participants/<br>Country                                                              | STBBI              | Intervention                                                                                                                                         | Measure/Metric                                                               | Results (MD=Mean difference, RR=risk ratio, IRR=incidence rate ratio, HR=hazard ratio, SD= standard deviation, 95% CI when presented. M=months, W=weeks)                                                                                                                                                 |
|--------------------------|--------------|-------------------------------------|---------------------------------------------------------------------------------------|--------------------|------------------------------------------------------------------------------------------------------------------------------------------------------|------------------------------------------------------------------------------|----------------------------------------------------------------------------------------------------------------------------------------------------------------------------------------------------------------------------------------------------------------------------------------------------------|
| 3 SMS                    | Bailey 2014  | UnCtrlled trial.                    | CT+ at clinic, AUS. n=64                                                              | CT                 | SMS reminders to recall for treatment.                                                                                                               | ATT treatment: Attendance rate.<br>Feasibility: Response rate.               | 100% treated for CT infection. 72% treated within 1 day of SMS.<br>94% replied to SMS, 84% the same day / Highly feasible.                                                                                                                                                                               |
| 8 SMS + PC               | Bassett 2016 | RCT                                 | ≥18yrs, ZAF. n=543(Int) n=471(Ctrl)                                                   | HIV/TB             | 5 scheduled PC) and 4 SMS, reminders to retrieve test results and attend appointments, over 4M.                                                      | ATT treatment: Attendance rate.                                              | No significant difference in reaching outcome at 9M (3M ART treatment or 3+6M of TB treatment) between intervention and control (39% vs 42%, RR=0.93, 95%CI 0.80-1.08) / No Impact                                                                                                                       |
| 12 SMS + PC              | Bigna 2014   | RCT                                 | Caregivers of HIV + children 18+ yrs, CMR. n=61(SMS+PC) n=60(PC) n=60(SMS) n=61(Ctrl) | HIV                | SMS+PC, SMS, or PC appointment reminders.                                                                                                            | ATT FU appointment: Attendance rate.                                         | Improved attendance. (OR=2.9 (1.3-6.3), p=0.012) / Effective.                                                                                                                                                                                                                                            |
| 18 SMS                   | Brook 2013   | Quasi-experimental: HxCtrl.         | Sexual health clinic, GBR. n=207(Int) n=169(HxCtrl)                                   | HIV, syphilis, HBV | SMS reminders.                                                                                                                                       | ATT testing: Attendance rate.                                                | Higher retesting rate (41% vs. 28%; p<0.001) / Effective.                                                                                                                                                                                                                                                |
| 21 SMS                   | Brook 2013   | Quasi-experimental: HxCtrl.         | Sexual health clinic, GBR. n=699(Int) n=768(HxCtrl)                                   | HIV                | SMS reminders 2 days before appointment.                                                                                                             | ATT FU appointment: LTFU rate.                                               | 35% improvement in overall LTFU rate (26% to 17%; p<0.0001) / Effective.                                                                                                                                                                                                                                 |
| 24 SMS                   | Burton 2013  | Quasi-experimental: HxCtrl.         | High risk for STI at clinic, GBR. n=273(Int) n=266(Ctrl)                              | CT, GC             | SMS STI testing reminders.                                                                                                                           | ATT: testing: Attendance rate.                                               | No change in retesting rates for those w/ recent CT or GC. (CT: 36% vs.33%; p=0.79) (GC: 19% vs. 33%; p=0.48) / No impact.                                                                                                                                                                               |
| 28 SMS                   | Coleman 2017 | Retrospective Quasi-experimental    | >=18 yrs, HIV+ pregnant women, ZAF. n=192(Int) n=447(Ctrl)                            | HIV                | Bi-weekly maternal health info sent throughout pregnancy and for one year after birth to increase HIV PCR testing postpartum and increase ANC visits | ATT testing: Attendance rate.<br>PB: Infection rate                          | 81.3% vs 75.4% in intervention vs control group likely to attend first PCR 6W postpartum. 40% increase in the likelihood of attending the recommended four ANC visits among individuals within the intervention group (RR: 1.41, CI: 1.15–1.72) / Effective.<br>3 infants born with HIV in control group |
| 34 SMS                   | Desai 2014   | Quasi-experimental: Conc. + HxCtrl. | High risk MSM at clinic, GBR. n=31(Int) n=656(Conc. Ctrl) n=745(HxCtrl)               | HIV                | SMS HIV/STI testing reminders.                                                                                                                       | ATT testing: Attendance rate.                                                | No significant change in re-testing odds. (32% in SMS vs.30% in Conc. Ctrl; OR=1.1(0.5-2.4) and 17% in HxCtrl; OR=2.3(1.0-4.9) / No impact.                                                                                                                                                              |
| 38 SMS + cash incentive  | Downing 2013 | RCT                                 | CT + or suspected at clinic 16+ yrs, AUS. n=30(Int) n=32(Ctrl)                        | CT                 | SMS appointment reminders + \$10 if attended.                                                                                                        | ATT testing: Attendance rate.                                                | Increased re-testing rate at 10-12W post CT treatment (without cash 26.7% vs. 6.3% in Ctrl; p=0.04); (with cash 28.1% vs. 6.3% in Ctrl; p=0.043) / Effective.                                                                                                                                            |
| 41 SMS                   | Evans 2015   | UnCtrlled trial.                    | African community, GBR. n=172                                                         | HIV                | 2 weekly Health Belief Model SMS to reduce risky sexual behaviours.                                                                                  | ATT testing: Self-report.<br>PB: Self-report.<br>Acceptability: Self-report. | 10.5% reported being tested for HIV during/after the 12W Int.<br>Non-significant increase in HIV knowledge & attitudes / No impact.<br>Acceptable & useful. Majority shared w/ others and want to get tested in future.                                                                                  |

|    |            |                              |                                        |                                                                                                                              |     |                                                                                                                      |                                                                                                                                  |                                                                                                                                                                                                                                                                                                                                                                                                                                                            |
|----|------------|------------------------------|----------------------------------------|------------------------------------------------------------------------------------------------------------------------------|-----|----------------------------------------------------------------------------------------------------------------------|----------------------------------------------------------------------------------------------------------------------------------|------------------------------------------------------------------------------------------------------------------------------------------------------------------------------------------------------------------------------------------------------------------------------------------------------------------------------------------------------------------------------------------------------------------------------------------------------------|
| 1  | SMS        | Farmer 2014                  | Quasi-experimental:<br>HxCtrl.         | HIV clinic attendees,<br>GBR. n=951(Int)<br>n=822(HxCtrl)                                                                    | HIV | SMS reminder 2 days<br>before appointment.                                                                           | ATT FU<br>appointment: LTFU<br>& cancellation rate.                                                                              | No difference in LTFU (25% vs.28%) or cancellation (62% vs.64%) / No impact.                                                                                                                                                                                                                                                                                                                                                                               |
| 2  |            |                              |                                        |                                                                                                                              |     |                                                                                                                      |                                                                                                                                  |                                                                                                                                                                                                                                                                                                                                                                                                                                                            |
| 3  | SMS        | Finocchario-<br>Kessler 2014 | Quasi-experimental:<br>HxCtrl.         | HIV+ mother-infant<br>pairs, KEN.<br>n=523(Int)<br>n=320(HxCtrl)                                                             | HIV | SMS notification of<br>available test results and<br>appointment reminder.                                           | ATT treatment:<br>Attendance rate.<br>TAT: Time from test<br>to diagnosis & test to<br>treat.<br>Feasibility: Retention<br>rate. | More infants initiated on ART (Urban: 11/11 vs. 1/7, p<0.001; Peri-urban: 14/14 vs. 9/14, p<0.05) / Effective.<br>Shorter median time to diagnosis (5 vs. 6.3W (urban) & 3.4 vs. 8.1W (peri-urban); both p<0.001). Shorter median time to treat (13 vs. 40 days (urban) & 1 vs. 36 days (peri-urban); p<0.001) / Effective.<br>Retention rate double at 9M post-natal (45.1% vs. 93% (urban) and 43.2% vs. 94.1% (peri-urban); p<0.001) / Highly feasible. |
| 4  |            |                              |                                        |                                                                                                                              |     |                                                                                                                      |                                                                                                                                  |                                                                                                                                                                                                                                                                                                                                                                                                                                                            |
| 5  |            |                              |                                        |                                                                                                                              |     |                                                                                                                      |                                                                                                                                  |                                                                                                                                                                                                                                                                                                                                                                                                                                                            |
| 6  |            |                              |                                        |                                                                                                                              |     |                                                                                                                      |                                                                                                                                  |                                                                                                                                                                                                                                                                                                                                                                                                                                                            |
| 7  |            |                              |                                        |                                                                                                                              |     |                                                                                                                      |                                                                                                                                  |                                                                                                                                                                                                                                                                                                                                                                                                                                                            |
| 8  |            |                              |                                        |                                                                                                                              |     |                                                                                                                      |                                                                                                                                  |                                                                                                                                                                                                                                                                                                                                                                                                                                                            |
| 9  |            |                              |                                        |                                                                                                                              |     |                                                                                                                      |                                                                                                                                  |                                                                                                                                                                                                                                                                                                                                                                                                                                                            |
| 10 | SMS        | Guy 2012                     | Quasi-experimental:<br>HxCtrl.         | STI clinic, AUS.<br>n=141(Int)<br>n=338(HxCtrl)                                                                              | CT  | SMS re-testing reminder<br>3M after initial infection.                                                               | ATT testing:<br>Attendance rate.                                                                                                 | Higher retesting rate (30% 1-4M post-infection vs. 21%; p=0.04); AOR=1.57(1.01-2.46) / Effective.                                                                                                                                                                                                                                                                                                                                                          |
| 11 |            |                              |                                        |                                                                                                                              |     |                                                                                                                      |                                                                                                                                  |                                                                                                                                                                                                                                                                                                                                                                                                                                                            |
| 12 |            |                              |                                        |                                                                                                                              |     |                                                                                                                      |                                                                                                                                  |                                                                                                                                                                                                                                                                                                                                                                                                                                                            |
| 13 | SMS        | Joseph Davey<br>2016         | RCT.                                   | HIV+ adults on ART,<br>MOZ<br>n=416 (Int)<br>n=414 (Ctrl)                                                                    | HIV | SMS reminders 2 and 7<br>days of appointment and<br>ART drug-pick up +<br>educational SMS every<br>2M.               | ATT treatment:<br>Attendance rate.                                                                                               | Nonsignificant difference in overall retention in care at 12 M (93.8% vs 91%, p=0.139)/ No impact.                                                                                                                                                                                                                                                                                                                                                         |
| 14 |            |                              |                                        |                                                                                                                              |     |                                                                                                                      |                                                                                                                                  |                                                                                                                                                                                                                                                                                                                                                                                                                                                            |
| 15 |            |                              |                                        |                                                                                                                              |     |                                                                                                                      |                                                                                                                                  |                                                                                                                                                                                                                                                                                                                                                                                                                                                            |
| 16 |            |                              |                                        |                                                                                                                              |     |                                                                                                                      |                                                                                                                                  |                                                                                                                                                                                                                                                                                                                                                                                                                                                            |
| 17 |            |                              |                                        |                                                                                                                              |     |                                                                                                                      |                                                                                                                                  |                                                                                                                                                                                                                                                                                                                                                                                                                                                            |
| 18 | SMS        | Kapman 2016                  | Quasi-experimental:<br>HxCtrl.         | Heterosexual clinic<br>attendees dx & tx for<br>CT, 16-23 yrs, NLD<br>n=828 (Int)<br>n=1530 (Ctrl)                           | CT  | 2 SMS reminders at<br>5.5M & 6M after initial<br>dx with CT for retesting<br>appointment scheduling<br>& attendance. | ATT testing:<br>Attendance rate.                                                                                                 | Higher attendance rate between 5-8M after initial dx (30.6% vs. 9.2%).                                                                                                                                                                                                                                                                                                                                                                                     |
| 19 |            |                              |                                        |                                                                                                                              |     |                                                                                                                      |                                                                                                                                  |                                                                                                                                                                                                                                                                                                                                                                                                                                                            |
| 20 |            |                              |                                        |                                                                                                                              |     |                                                                                                                      |                                                                                                                                  |                                                                                                                                                                                                                                                                                                                                                                                                                                                            |
| 21 |            |                              |                                        |                                                                                                                              |     |                                                                                                                      |                                                                                                                                  |                                                                                                                                                                                                                                                                                                                                                                                                                                                            |
| 22 |            |                              |                                        |                                                                                                                              |     |                                                                                                                      |                                                                                                                                  |                                                                                                                                                                                                                                                                                                                                                                                                                                                            |
| 23 | SMS        | Kharbanda 2011               | Quasi-experimental:<br>Conc. + HxCtrl. | Parents of girls 9-20<br>yrs at clinics, USA.<br>n=124(Int)<br>n=308(Conc. Ctrl)<br>n=1080(HxCtrl)                           | HPV | Up to 3 weekly SMS<br>vaccination reminders.                                                                         | ATT vaccination:<br>Attendance rate.                                                                                             | More likely to get vaccine on time after controlling for insurance and site of care (AOR=1.83(1.23-2.71)) / Effective.                                                                                                                                                                                                                                                                                                                                     |
| 24 |            |                              |                                        |                                                                                                                              |     |                                                                                                                      |                                                                                                                                  |                                                                                                                                                                                                                                                                                                                                                                                                                                                            |
| 25 |            |                              |                                        |                                                                                                                              |     |                                                                                                                      |                                                                                                                                  |                                                                                                                                                                                                                                                                                                                                                                                                                                                            |
| 26 |            |                              |                                        |                                                                                                                              |     |                                                                                                                      |                                                                                                                                  |                                                                                                                                                                                                                                                                                                                                                                                                                                                            |
| 27 |            |                              |                                        |                                                                                                                              |     |                                                                                                                      |                                                                                                                                  |                                                                                                                                                                                                                                                                                                                                                                                                                                                            |
| 28 | SMS        | Kliner 2013                  | Quasi-experimental:<br>HxCtrl.         | HIV+ at hospital,<br>SWZ. n=162(Int)<br>n=297(HxCtrl)                                                                        | HIV | SMS reminders one day<br>before appointment.                                                                         | ATT FU<br>appointment:<br>Attendance rate.                                                                                       | No difference. SMS 83.3% vs. Ctrl 80.1%; p=0.401. AOR=1.13, p=0.662 / No impact.                                                                                                                                                                                                                                                                                                                                                                           |
| 29 |            |                              |                                        |                                                                                                                              |     |                                                                                                                      |                                                                                                                                  |                                                                                                                                                                                                                                                                                                                                                                                                                                                            |
| 30 |            |                              |                                        |                                                                                                                              |     |                                                                                                                      |                                                                                                                                  |                                                                                                                                                                                                                                                                                                                                                                                                                                                            |
| 31 | SMS        | Matheson 2014                | Quasi-experimental.                    | 11-22 yrs at clinic,<br>USA.<br>n=37(Int) n=232(Ctrl)                                                                        | HPV | SMS vaccination<br>reminders (3 SMS per<br>dose).                                                                    | ATT vaccination:<br>Attendance rate.                                                                                             | Higher attendance rate. HPV2 vaccine complete: 73% vs.34%, (p=0.000); on-time HPV2 38% vs. 25%, (p=0.035). HPV3 complete 16% vs.6%, (p=0.018); on-time HPV3 14% vs.3%, (p=0.007) / Effective.                                                                                                                                                                                                                                                              |
| 32 |            |                              |                                        |                                                                                                                              |     |                                                                                                                      |                                                                                                                                  |                                                                                                                                                                                                                                                                                                                                                                                                                                                            |
| 33 |            |                              |                                        |                                                                                                                              |     |                                                                                                                      |                                                                                                                                  |                                                                                                                                                                                                                                                                                                                                                                                                                                                            |
| 34 | SMS        | McIver 2016                  | Quasi-experimental:<br>HxCtrl.         | Clinic attendees<br>susceptible to HBV<br>(HIV+, bisexual,<br>CSW, IDUs,<br>Aboriginals), AUS<br>n=241 (Int)<br>n=463 (Ctrl) | HBV | SMS reminders 1 day<br>before appointment for<br>HBV vaccine doses 2&3<br>reattendance.                              | ATT vaccination:<br>Attendance rate.                                                                                             | Nonsignificant decrease in attendance rate within 12 M (54% vs 56% for 2 doses, p=0.65/ 24% vs 30% for 3 doses, p=0.07)/ No impact<br>Nonsignificant difference in completion of 3 doses in 12M. aOR= 0.7 (0.48-1.01)/No impact.                                                                                                                                                                                                                           |
| 35 |            |                              |                                        |                                                                                                                              |     |                                                                                                                      |                                                                                                                                  |                                                                                                                                                                                                                                                                                                                                                                                                                                                            |
| 36 |            |                              |                                        |                                                                                                                              |     |                                                                                                                      |                                                                                                                                  |                                                                                                                                                                                                                                                                                                                                                                                                                                                            |
| 37 |            |                              |                                        |                                                                                                                              |     |                                                                                                                      |                                                                                                                                  |                                                                                                                                                                                                                                                                                                                                                                                                                                                            |
| 38 |            |                              |                                        |                                                                                                                              |     |                                                                                                                      |                                                                                                                                  |                                                                                                                                                                                                                                                                                                                                                                                                                                                            |
| 39 |            |                              |                                        |                                                                                                                              |     |                                                                                                                      |                                                                                                                                  |                                                                                                                                                                                                                                                                                                                                                                                                                                                            |
| 40 | SMS        | Njuguna 2016                 | RCT.                                   | Rural women, 18-24<br>yrs, KEN<br>n=300 (Int)<br>n=300 (Ctrl)                                                                | HIV | Weekly SMS on HIV<br>and reproductive health.                                                                        | ATT testing: Self-<br>report.                                                                                                    | Significant increase in reported testing at 6M (67% vs 51%, aHR=1.54(1.25-1.90)/ Effective.                                                                                                                                                                                                                                                                                                                                                                |
| 41 |            |                              |                                        |                                                                                                                              |     |                                                                                                                      |                                                                                                                                  |                                                                                                                                                                                                                                                                                                                                                                                                                                                            |
| 42 |            |                              |                                        |                                                                                                                              |     |                                                                                                                      |                                                                                                                                  |                                                                                                                                                                                                                                                                                                                                                                                                                                                            |
| 43 |            |                              |                                        |                                                                                                                              |     |                                                                                                                      |                                                                                                                                  |                                                                                                                                                                                                                                                                                                                                                                                                                                                            |
| 44 | SMS vs. PC | Norton 2014                  | RCT                                    | HIV+, 17+ yrs, USA.<br>n=25(Int) n=27(Ctrl)                                                                                  | HIV | SMS appointment<br>reminder vs. message to<br>home phone.                                                            | ATT FU<br>appointment:<br>Attendance rate.                                                                                       | No difference (72% vs. 81%, p=0.42) but patients already had high attendance rate / No impact.                                                                                                                                                                                                                                                                                                                                                             |
| 45 |            |                              |                                        |                                                                                                                              |     |                                                                                                                      |                                                                                                                                  |                                                                                                                                                                                                                                                                                                                                                                                                                                                            |
| 46 |            |                              |                                        |                                                                                                                              |     |                                                                                                                      |                                                                                                                                  |                                                                                                                                                                                                                                                                                                                                                                                                                                                            |

|    |          |                |                                        |                                                                                                                                                       |          |                                                                                  |                                                                                                             |                                                                                                                                                                                                                                                                                                                                                                                                                                                 |
|----|----------|----------------|----------------------------------------|-------------------------------------------------------------------------------------------------------------------------------------------------------|----------|----------------------------------------------------------------------------------|-------------------------------------------------------------------------------------------------------------|-------------------------------------------------------------------------------------------------------------------------------------------------------------------------------------------------------------------------------------------------------------------------------------------------------------------------------------------------------------------------------------------------------------------------------------------------|
| 1  | SMS      | Nyatsanza 2016 | Quasi-experimental:<br>HxCtrl.         | MSM & CSW at high-<br>risk of STI, GBR<br>n=266 (Int)<br>n=273 (Ctrl)                                                                                 | HIV/STI  | Personalised SMS<br>reminders for<br>reattendance.                               | ATT testing:<br>Attendance rate.                                                                            | Significantly higher reattendance rate at 6M (56% vs. 33%, p<0.001)/<br>Effective.                                                                                                                                                                                                                                                                                                                                                              |
| 2  |          |                |                                        |                                                                                                                                                       |          |                                                                                  |                                                                                                             |                                                                                                                                                                                                                                                                                                                                                                                                                                                 |
| 3  |          |                |                                        |                                                                                                                                                       |          |                                                                                  |                                                                                                             |                                                                                                                                                                                                                                                                                                                                                                                                                                                 |
| 4  | SMS      | Odeny 2012     | RCT                                    | Males circumcised at<br>clinic 18+ yrs, KEN.<br>n=600(Int)<br>n=600(Ctrl)                                                                             | HIV      | Daily SMS for 1W.                                                                | ATT FU<br>appointment:<br>Attendance rate.<br>PB: Self-report.                                              | Improved attendance within 3 days of post-operative clinic appointment:<br>65.4% vs.59.7% (RR=1.09(1.00–1.20); p=0.04) / Effective.<br>Abstinence of sexual activity before FU: 28.3% vs. 25.2% (RR=1.13(0.91-<br>1.38), p=0.3) / No impact.                                                                                                                                                                                                    |
| 5  |          |                |                                        |                                                                                                                                                       |          |                                                                                  |                                                                                                             |                                                                                                                                                                                                                                                                                                                                                                                                                                                 |
| 6  |          |                |                                        |                                                                                                                                                       |          |                                                                                  |                                                                                                             |                                                                                                                                                                                                                                                                                                                                                                                                                                                 |
| 7  |          |                |                                        |                                                                                                                                                       |          |                                                                                  |                                                                                                             |                                                                                                                                                                                                                                                                                                                                                                                                                                                 |
| 8  | SMS      | Rand 2015      | RCT                                    | 11-16 yrs at clinic,<br>USA. n=1893(Int)<br>n=1919(Ctrl)                                                                                              | HPV      | SMS appointment<br>reminders.                                                    | ATT vaccination:<br>Attendance rate.                                                                        | Higher HPV1 vaccination rate (16% vs. 13%; HR= 1.3(1.0-1.6); p=0.04) /<br>Effective.                                                                                                                                                                                                                                                                                                                                                            |
| 9  |          |                |                                        |                                                                                                                                                       |          |                                                                                  |                                                                                                             |                                                                                                                                                                                                                                                                                                                                                                                                                                                 |
| 10 |          |                |                                        |                                                                                                                                                       |          |                                                                                  |                                                                                                             |                                                                                                                                                                                                                                                                                                                                                                                                                                                 |
| 11 | SMS/PC   | Rand 2016      | RCT.                                   | Clinic attendees<br>Parents of youth 11-17<br>yrs who received 1st<br>HPV vaccine, USA.<br>n=191 (SMS)<br>n=200 (Ctrl);<br>n=178 (PC)<br>n=180 (Ctrl) | HPV      | SMS appointment<br>reminders to receive 3<br>doses of HPV vaccine<br>over 2 yrs. | ATT vaccination:<br>Attendance rate.<br>TAT: Time from<br>enroll to completion<br>of 3 vaccines.            | SMS: Significant difference in vaccination rates compared to control (49%<br>vs 30%, p=0.001)/ Effective.<br>PC: No difference in vaccination rates compared to control (48% vs 40%,<br>p=0.34)/ No impact.<br>SMS: Significant difference in time taken to complete 3 HPV doses (71 days<br>earlier than control, p<0.001)/ Effective.<br>PC: No difference in time taken to complete 3 HPV doses compared to<br>control ( p=0.08)/ No impact. |
| 12 |          |                |                                        |                                                                                                                                                       |          |                                                                                  |                                                                                                             |                                                                                                                                                                                                                                                                                                                                                                                                                                                 |
| 13 |          |                |                                        |                                                                                                                                                       |          |                                                                                  |                                                                                                             |                                                                                                                                                                                                                                                                                                                                                                                                                                                 |
| 14 |          |                |                                        |                                                                                                                                                       |          |                                                                                  |                                                                                                             |                                                                                                                                                                                                                                                                                                                                                                                                                                                 |
| 15 |          |                |                                        |                                                                                                                                                       |          |                                                                                  |                                                                                                             |                                                                                                                                                                                                                                                                                                                                                                                                                                                 |
| 16 |          |                |                                        |                                                                                                                                                       |          |                                                                                  |                                                                                                             |                                                                                                                                                                                                                                                                                                                                                                                                                                                 |
| 17 |          |                |                                        |                                                                                                                                                       |          |                                                                                  |                                                                                                             |                                                                                                                                                                                                                                                                                                                                                                                                                                                 |
| 18 |          |                |                                        |                                                                                                                                                       |          |                                                                                  |                                                                                                             |                                                                                                                                                                                                                                                                                                                                                                                                                                                 |
| 19 |          |                |                                        |                                                                                                                                                       |          |                                                                                  |                                                                                                             |                                                                                                                                                                                                                                                                                                                                                                                                                                                 |
| 20 | SMS + PC | Schwartz 2015  | Quasi-experimental:<br>HxCtrl.         | HIV+ pregnant<br>women on ART, ZAF.<br>n=50                                                                                                           | HIV      | SMS messages and PCs<br>from a case manager<br>(CM) through 6W<br>postpartum.    | ATT testing:<br>Attendance rate.<br>Acceptability: Self-<br>report.<br>Feasibility:<br>Completion rate.     | More infant testing (90.0% vs. 63.3% at 10W; p<0.01) / Effective.<br>Helpful to have CM support during pregnancy and postpartum (98%) /<br>Highly acceptable.<br>96% completed postpartum questionnaire / Highly feasible.                                                                                                                                                                                                                      |
| 21 |          |                |                                        |                                                                                                                                                       |          |                                                                                  |                                                                                                             |                                                                                                                                                                                                                                                                                                                                                                                                                                                 |
| 22 |          |                |                                        |                                                                                                                                                       |          |                                                                                  |                                                                                                             |                                                                                                                                                                                                                                                                                                                                                                                                                                                 |
| 23 |          |                |                                        |                                                                                                                                                       |          |                                                                                  |                                                                                                             |                                                                                                                                                                                                                                                                                                                                                                                                                                                 |
| 24 |          |                |                                        |                                                                                                                                                       |          |                                                                                  |                                                                                                             |                                                                                                                                                                                                                                                                                                                                                                                                                                                 |
| 25 |          |                |                                        |                                                                                                                                                       |          |                                                                                  |                                                                                                             |                                                                                                                                                                                                                                                                                                                                                                                                                                                 |
| 26 | SMS + PC | Segaren 2012   | UnCtrlled trial.                       | Mothers of HIV+<br>infants, HTI. n=108                                                                                                                | HIV      | Cell phones + regular PC<br>for monitoring of mother<br>& child.                 | ATT treatment:<br>Attendance rate.<br>Acceptability: Self-<br>report.                                       | All 76 w/ active phones were adherent to treatment (attended 6/6 monthly<br>hospital appointments).<br>70% phones active after Int.; good for med reminders (63%) / Moderately<br>acceptable.                                                                                                                                                                                                                                                   |
| 27 |          |                |                                        |                                                                                                                                                       |          |                                                                                  |                                                                                                             |                                                                                                                                                                                                                                                                                                                                                                                                                                                 |
| 28 |          |                |                                        |                                                                                                                                                       |          |                                                                                  |                                                                                                             |                                                                                                                                                                                                                                                                                                                                                                                                                                                 |
| 29 |          |                |                                        |                                                                                                                                                       |          |                                                                                  |                                                                                                             |                                                                                                                                                                                                                                                                                                                                                                                                                                                 |
| 30 | SMS + PC | Smillie 2014   | UnCtrlled trial.                       | HIV+ in clinic 14+<br>yrs, CAN. n=20                                                                                                                  | HIV      | Weekly PC or SMS for<br>6M.                                                      | ATT FU<br>appointment: Self-<br>report.<br>Acceptability: Self-<br>report.<br>Feasibility: Self-<br>report. | 65% said SMS had no effect on attendance.<br>Beneficial for appointment scheduling (80%) & reminder (75%). All would<br>recommend to a friend / Highly acceptable.<br>75% had no difficulty in receiving and responding to SMS / Highly feasible.                                                                                                                                                                                               |
| 31 |          |                |                                        |                                                                                                                                                       |          |                                                                                  |                                                                                                             |                                                                                                                                                                                                                                                                                                                                                                                                                                                 |
| 32 |          |                |                                        |                                                                                                                                                       |          |                                                                                  |                                                                                                             |                                                                                                                                                                                                                                                                                                                                                                                                                                                 |
| 33 |          |                |                                        |                                                                                                                                                       |          |                                                                                  |                                                                                                             |                                                                                                                                                                                                                                                                                                                                                                                                                                                 |
| 34 |          |                |                                        |                                                                                                                                                       |          |                                                                                  |                                                                                                             |                                                                                                                                                                                                                                                                                                                                                                                                                                                 |
| 35 |          |                |                                        |                                                                                                                                                       |          |                                                                                  |                                                                                                             |                                                                                                                                                                                                                                                                                                                                                                                                                                                 |
| 36 |          |                |                                        |                                                                                                                                                       |          |                                                                                  |                                                                                                             |                                                                                                                                                                                                                                                                                                                                                                                                                                                 |
| 37 | SMS      | Tolly 2012     | RCT                                    | Randomly sampled<br>adults (existing<br>database), ZAF.<br>n=438(in each of 4<br>Int.)<br>n=801(Ctrl)                                                 | HIV      | 3 or 10 motivational or<br>informational SMS.                                    | ATT testing: Self-<br>report.<br>Feasibility: Self-<br>report.                                              | Improved attendance in group receiving 10 motivational SMS at 3W: (69%<br>vs. 57%; OR=1.7(1.10–2.390), p=0.0036) / Effective.<br>SMS motivated HIV counseling and testing uptake in 89% / Highly feasible.                                                                                                                                                                                                                                      |
| 38 |          |                |                                        |                                                                                                                                                       |          |                                                                                  |                                                                                                             |                                                                                                                                                                                                                                                                                                                                                                                                                                                 |
| 39 |          |                |                                        |                                                                                                                                                       |          |                                                                                  |                                                                                                             |                                                                                                                                                                                                                                                                                                                                                                                                                                                 |
| 40 |          |                |                                        |                                                                                                                                                       |          |                                                                                  |                                                                                                             |                                                                                                                                                                                                                                                                                                                                                                                                                                                 |
| 41 |          |                |                                        |                                                                                                                                                       |          |                                                                                  |                                                                                                             |                                                                                                                                                                                                                                                                                                                                                                                                                                                 |
| 42 |          |                |                                        |                                                                                                                                                       |          |                                                                                  |                                                                                                             |                                                                                                                                                                                                                                                                                                                                                                                                                                                 |
| 43 | SMS      | Vilella 2004   | Quasi-experimental:<br>Conc. + HxCtrl. | 18+ yrs at travel clinic,<br>ESP. n=738(Int)<br>n=1610(Conc. Ctrl)<br>n=2247(HxCtrl)                                                                  | HAV/ HBV | SMS reminders for<br>vaccination<br>appointments.                                | ATT vaccination:<br>Attendance rate.                                                                        | Improved adherence for 3rd HepA+B dose. (47.1% vs. 26.9%,<br>RR=1.75(1.41–2.17) in Conc. Ctrl and 23.6%(20.1–27.4), RR=2.00(1.63–<br>2.45) in HxCtrl) / Effective.                                                                                                                                                                                                                                                                              |
| 44 |          |                |                                        |                                                                                                                                                       |          |                                                                                  |                                                                                                             |                                                                                                                                                                                                                                                                                                                                                                                                                                                 |
| 45 |          |                |                                        |                                                                                                                                                       |          |                                                                                  |                                                                                                             |                                                                                                                                                                                                                                                                                                                                                                                                                                                 |



|    |                      |                     |                                  |                                                           |     |                                                                        |                                          |                                                                                                                                                                                                                   |
|----|----------------------|---------------------|----------------------------------|-----------------------------------------------------------|-----|------------------------------------------------------------------------|------------------------------------------|-------------------------------------------------------------------------------------------------------------------------------------------------------------------------------------------------------------------|
| 1  | SMS                  | Ammassari 2010      | UnCtrlled trial.                 | HIV+, ITA. n=71                                           | HIV | SMS reminders.                                                         | ART in NAPs: Self-report.                | Increased adherence over 9M. (93.2% vs.79.6%, p=0.003) / Effective.                                                                                                                                               |
| 2  |                      |                     |                                  |                                                           |     |                                                                        |                                          |                                                                                                                                                                                                                   |
| 3  | SMS                  | Ammassari 2011      | UnCtrlled trial.                 | HIV+, 18+ yrs, ITA. n=145                                 | HIV | SMS reminders.                                                         | ART in NAPs: Self-report.                | Increased adherence at 9M (94.9% vs.78.8%, p<0.001) / Effective.                                                                                                                                                  |
| 4  |                      |                     |                                  |                                                           |     |                                                                        |                                          |                                                                                                                                                                                                                   |
| 5  |                      |                     |                                  |                                                           |     |                                                                        | ART in NAPs: VL.                         | More w/ undetectable VL at 9M (76.2% vs. 42.3%, p<0.001) / Effective.                                                                                                                                             |
| 6  |                      |                     |                                  |                                                           |     |                                                                        | Acceptability: Self-report.              | >90% reporting SMS helpful / Highly acceptable.                                                                                                                                                                   |
| 7  |                      |                     |                                  |                                                           |     |                                                                        |                                          |                                                                                                                                                                                                                   |
| 8  | PC + cash incentives | Belzer 2014         | RCT                              | HIV+ 12-29 yrs, USA. n=19(Int) n=18(Ctrl)                 | HIV | Daily PC reminders and referrals if necessary+ free phone & plan.      | ART in NAPs: Self-report.                | Increased adherence for 1M & 3 M (OR=3.09(1.20-7.98); OR=2.85(1.02-7.97)) / Effective.                                                                                                                            |
| 9  |                      |                     |                                  |                                                           |     |                                                                        | ART in NAPs: VL.                         | Lower VL at wk 24 and 48 (2.82 vs. 4.52, p=0.002; 3.23 vs. 4.23, p=0.043) / Effective.                                                                                                                            |
| 10 |                      |                     |                                  |                                                           |     |                                                                        |                                          |                                                                                                                                                                                                                   |
| 11 |                      |                     |                                  |                                                           |     |                                                                        |                                          |                                                                                                                                                                                                                   |
| 12 |                      |                     |                                  |                                                           |     |                                                                        |                                          |                                                                                                                                                                                                                   |
| 13 | SMS                  | Cantudo-Cuenca 2016 | Retrospective quasi-exprimental. | HIV + on ART, ESP n=120 (Int&Ctrl)                        | HIV | SMS on ART adherence.                                                  | ART in PVLA: Pharmacy refills.           | Statistically sign relationship bt no SMS and ART adherence(OR= 0.35 (0.14-0.8), p=0.025) [multivariate analysis]/ Effective.                                                                                     |
| 14 |                      |                     |                                  |                                                           |     |                                                                        |                                          |                                                                                                                                                                                                                   |
| 15 |                      |                     |                                  |                                                           |     |                                                                        |                                          |                                                                                                                                                                                                                   |
| 16 | SMS                  | da Costa 2012       | RCT                              | HIV+ women, BRA. n=8(Int) n=13(Ctrl)                      | HIV | Daily SMS reminders.                                                   | ART in APs: Pill count.                  | Increased adherence over 4M (50% vs. 38.5%; p=0.604) / No impact.                                                                                                                                                 |
| 17 |                      |                     |                                  |                                                           |     |                                                                        | ART in APs: MEM.                         | Increased adherence over 4M (75% vs. 46%; p=0.195) / No impact.                                                                                                                                                   |
| 18 |                      |                     |                                  |                                                           |     |                                                                        | ART in APs: Self-report.                 | Increased adherence (100% vs. 84.6% in Ctrl; p=0.244) / No impact.                                                                                                                                                |
| 19 |                      |                     |                                  |                                                           |     |                                                                        | Acceptability: Self-report.              | 82% believed SMS were helpful, 77% wanted to keep receiving SMS / Highly acceptable.                                                                                                                              |
| 20 |                      |                     |                                  |                                                           |     |                                                                        |                                          |                                                                                                                                                                                                                   |
| 21 |                      |                     |                                  |                                                           |     |                                                                        |                                          |                                                                                                                                                                                                                   |
| 22 |                      |                     |                                  |                                                           |     |                                                                        |                                          |                                                                                                                                                                                                                   |
| 23 |                      |                     |                                  |                                                           |     |                                                                        |                                          |                                                                                                                                                                                                                   |
| 24 | SMS                  | Downshen 2011       | UnCtrlled trial.                 | HIV+ 14-29 yrs, AUS. n=25                                 | HIV | Daily SMS ART reminder + FU SMS 1hr later.                             | ART in NAPs: Self-report.                | Increased adherence (Baseline Mean=74.7; 12W Mean=93.3; 24WMean=93.1; p<0.001) / Effective.                                                                                                                       |
| 25 |                      |                     |                                  |                                                           |     |                                                                        | ART in NAPs: VL + CD4 count.             | Insignificant change in CD4 cell count & VL (mean VL= 2750, CD4= 502 to VL= 29, CD4= 545 at 24W, p=0.12) / No impact.                                                                                             |
| 26 |                      |                     |                                  |                                                           |     |                                                                        | Acceptability: Self-report.              | 81% want SMS after study end. Helped decrease missed doses in 95% / Highly acceptable.                                                                                                                            |
| 27 |                      |                     |                                  |                                                           |     |                                                                        |                                          |                                                                                                                                                                                                                   |
| 28 |                      |                     |                                  |                                                           |     |                                                                        |                                          |                                                                                                                                                                                                                   |
| 29 |                      |                     |                                  |                                                           |     |                                                                        |                                          |                                                                                                                                                                                                                   |
| 30 | SMS                  | Downshen 2011       | UnCtrlled trial.                 | HIV+ 14-29 yrs, AUS. n=25                                 | HIV | Daily SMS ART reminder + FU SMS 1hr later.                             | ART in NAPs: Self-report.                | Decreased adherence (58.3% for 0-12W vs. 55.2% for 13-24W, p=0.53) / No impact.                                                                                                                                   |
| 31 |                      |                     |                                  |                                                           |     |                                                                        | Feasibility: Completion & response rate. | 84% completed all study visits. 61.4% response rate / Highly feasible.                                                                                                                                            |
| 32 |                      |                     |                                  |                                                           |     |                                                                        |                                          |                                                                                                                                                                                                                   |
| 33 |                      |                     |                                  |                                                           |     |                                                                        |                                          |                                                                                                                                                                                                                   |
| 34 |                      |                     |                                  |                                                           |     |                                                                        |                                          |                                                                                                                                                                                                                   |
| 35 |                      |                     |                                  |                                                           |     |                                                                        |                                          |                                                                                                                                                                                                                   |
| 36 | SMS + cash incentive | Garofalo 2016       | RCT                              | 16-29yrs, HIV+ on ART for ≥1M , USA. n=51(Int) n=54(Ctrl) | HIV | Daily personalised SMS over 6M to remind participants take medications | ART in NAPs: Self-report.                | Significant difference in adherence compared to control at 3M OR=2.57 (1.01-6.54). Not significant at 6M OR=1.68 (0.69-4.09). Significant difference from baseline to 6M OR=2.12 (95% CI 1.01-4.45). / Effective. |
| 37 |                      |                     |                                  |                                                           |     |                                                                        | ART in NAPs: VL.                         | No difference in log viral load or viral suppression compared to control at 3 and 6M / No impact.                                                                                                                 |
| 38 |                      |                     |                                  |                                                           |     |                                                                        | Acceptability: Self-report.              | 100% would recommend intervention to those in need, 81 % wanted to continue getting the text messages after conclusion of the study, 95 % satisfied with the intervention overall / Highly acceptable             |
| 39 |                      |                     |                                  |                                                           |     |                                                                        | Feasibility: Response rate.              | 58% average response rate to SMS / Moderately feasible.                                                                                                                                                           |
| 40 |                      |                     |                                  |                                                           |     |                                                                        |                                          |                                                                                                                                                                                                                   |
| 41 |                      |                     |                                  |                                                           |     |                                                                        |                                          |                                                                                                                                                                                                                   |
| 42 |                      |                     |                                  |                                                           |     |                                                                        |                                          |                                                                                                                                                                                                                   |
| 43 |                      |                     |                                  |                                                           |     |                                                                        |                                          |                                                                                                                                                                                                                   |
| 44 |                      |                     |                                  |                                                           |     |                                                                        |                                          |                                                                                                                                                                                                                   |
| 45 |                      |                     |                                  |                                                           |     |                                                                        |                                          |                                                                                                                                                                                                                   |
| 46 |                      |                     |                                  |                                                           |     |                                                                        |                                          |                                                                                                                                                                                                                   |

|    |                            |                |     |                                                                               |     |                                                                                                                                                                              |                                                              |                                                                                                                                                                                                                                                                                        |
|----|----------------------------|----------------|-----|-------------------------------------------------------------------------------|-----|------------------------------------------------------------------------------------------------------------------------------------------------------------------------------|--------------------------------------------------------------|----------------------------------------------------------------------------------------------------------------------------------------------------------------------------------------------------------------------------------------------------------------------------------------|
| 1  | SMS +PC                    | Haberer 2016   | RCT | ≥18yrs, HIV+ on ART, UGA. n=21(Scheduled SMS) n=20 (Triggered SMS) n=21(Ctrl) | HIV | Scheduled SMS: 1M daily SMS, 2M weekly SMS, 6M SMS sent to patient and support if needed. Triggered SMS; SMS sent to patient and support if no signal received from monitor. | ART: MEM                                                     | Significant difference in scheduled SMS intervention compared to control (11.1% increase in adherence, 48-h and more than 96-h lapses were less frequent (IRR=0.6, p value=0.02 and IRR 0.3, P<0.001, respectively). Similar adherence in triggered SMS vs control group. / Effective. |
| 2  |                            |                |     |                                                                               |     |                                                                                                                                                                              | ART: VL                                                      | No significant differences in HIV RNA suppression among study arms (p value = 0.14). 47/62 participants virally suppressed at 3 and 9M / No impact.                                                                                                                                    |
| 3  |                            |                |     |                                                                               |     |                                                                                                                                                                              |                                                              |                                                                                                                                                                                                                                                                                        |
| 4  |                            |                |     |                                                                               |     |                                                                                                                                                                              |                                                              |                                                                                                                                                                                                                                                                                        |
| 5  |                            |                |     |                                                                               |     |                                                                                                                                                                              |                                                              |                                                                                                                                                                                                                                                                                        |
| 6  |                            |                |     |                                                                               |     |                                                                                                                                                                              |                                                              |                                                                                                                                                                                                                                                                                        |
| 7  | SMS                        | Hardy 2011     | RCT | HIV+ 18+ yrs, USA. n=12(SMS) n=14(Beeper)                                     | HIV | SMS vs. beeper reminders.                                                                                                                                                    | ART in APs: Composite score (MEM+ pill count + self-report). | Higher adherence at 6W. (MD=27.1(7.6-46.6), p=0.009) / Effective.                                                                                                                                                                                                                      |
| 8  |                            |                |     |                                                                               |     |                                                                                                                                                                              | ART in APs: MEM.                                             | Increased adherence. (MD=33.4(14.1-52.6), p = 0.002) / Effective.                                                                                                                                                                                                                      |
| 9  |                            |                |     |                                                                               |     |                                                                                                                                                                              | ART in APs: Pill count.                                      | No difference. (MD=13.7(-6.7-34.1), p = 0.153) / No impact.                                                                                                                                                                                                                            |
| 10 |                            |                |     |                                                                               |     |                                                                                                                                                                              | ART in APs: Self-report.                                     | No difference. (MD=20.2 (-1.8-42.1), p = 0.069) / No impact.                                                                                                                                                                                                                           |
| 11 |                            |                |     |                                                                               |     |                                                                                                                                                                              |                                                              |                                                                                                                                                                                                                                                                                        |
| 12 | SMS                        | Jeffries 2016  | RCT | 15-24yrs, HIV+, USA. n=91(Int) n=45(Ctrl)                                     | HIV | UCARE4LIFE daily mobile text messaging intervention over 3M to improve HIV care among youth                                                                                  | ART: VL                                                      | Significant difference in ART adherence in intervention vs control among non-adherent/new to ART at baseline (6M p=0.03). / Effective. No sig difference in those on ART at baseline (6M p=0.119) /No impact.                                                                          |
| 13 |                            |                |     |                                                                               |     |                                                                                                                                                                              | Acceptability: Self-report.                                  | Mean score = 8.44 (SD=2.45) on 10 point Likert Scale for appointment reminder SMS./ Highly acceptable                                                                                                                                                                                  |
| 14 |                            |                |     |                                                                               |     |                                                                                                                                                                              |                                                              |                                                                                                                                                                                                                                                                                        |
| 15 | PC                         | Kalichman 2011 | RCT | HIV+ 18+ yrs, USA. n=21(Int) n=19(Ctrl)                                       | HIV | PC counselling.                                                                                                                                                              | ART in NAPs: Pill count.                                     | No difference at 4M (F(1,36)=3.32, p<0.07) / No impact.                                                                                                                                                                                                                                |
| 16 |                            |                |     |                                                                               |     |                                                                                                                                                                              | Feasibility: Completion rate.                                | 99% completion rate / Highly feasible.                                                                                                                                                                                                                                                 |
| 17 |                            |                |     |                                                                               |     |                                                                                                                                                                              |                                                              |                                                                                                                                                                                                                                                                                        |
| 18 | SMS                        | Kassaye 2016   | RCT | HIV+ pregnant women, KEN n=280 (Int) n=270 (Ctrl)                             | HIV | 3 to 6 weekly SMS (ART reminders, motivational, PMTCT, child health & nutrition).                                                                                            | ART in TNPs: Self-report.                                    | Nonsignificant difference in adherence to ART at 34-36W gestation between the 2 groups (97.3% vs 99.6%, aRR= 1.25 (0.43-3.60)/No impact. Nonsignificant difference in adherence to ART at delivery between the 2 groups (94.7% vs 100%, aRR=1.01 (0.88-1.16))/ No impact.              |
| 19 |                            |                |     |                                                                               |     |                                                                                                                                                                              |                                                              |                                                                                                                                                                                                                                                                                        |
| 20 | PC                         | Kebaya 2014    | RCT | HIV+ mothers in PMTCT, KEN. n=75(Int) n=75(Ctrl)                              | HIV | Bi-weekly PC.                                                                                                                                                                | ART in TNPs: Self-report.                                    | Increased adherence (90.7% vs. 72%, p=0.005) / Effective.                                                                                                                                                                                                                              |
| 21 |                            |                |     |                                                                               |     |                                                                                                                                                                              | Feasibility: Retention rate.                                 | More likely to remain in treatment at 10W (69.3% vs 37.3%, p<0.001) / Moderately feasible.                                                                                                                                                                                             |
| 22 | SMS                        | Lester 2010    | RCT | HIV+ 18+ yrs, KEN. n=273(Int) n=265(Ctrl)                                     | HIV | Weekly SMS.                                                                                                                                                                  | ART in TNPs: Self-report.                                    | Improved adherence at 6M and 12M: RR=0.81(0.69-0.94) p=0.006 / Effective.                                                                                                                                                                                                              |
| 23 |                            |                |     |                                                                               |     |                                                                                                                                                                              | ART in TNPs: VL.                                             | Lower virological failure (RR=0.84(0.71-0.99) p=0.04) and improved viral suppression (OR=0.71(0.5-1.01) p=0.058) / Effective.                                                                                                                                                          |
| 24 | SMS + PC + cash incentives | Maduka 2013    | RCT | HIV+ at hospital 20+ yrs, NGA. n=52(Int) n=52(Ctrl)                           | HIV | 2 monthly counselling PCs + 2 weekly SMS+ cash incentives                                                                                                                    | ART in NAPs: Self-report.                                    | Increased adherence (76.9% vs. 55.8%, X2=5.211,p=0.022; RR=0.725(0.55-0.96)) / Effective.                                                                                                                                                                                              |
| 25 |                            |                |     |                                                                               |     |                                                                                                                                                                              | ART in NAPs: CD4 count.                                      | Improved CD4+ count (193-->575 cells/mL vs. 131-->361.5 cells/mL; p=0.007) / Effective.                                                                                                                                                                                                |
| 26 | SMS + PC                   | Mbuagbaw 2012  | RCT | HIV+ 21+ yrs, CMR. n=101(Int) n=99(Ctrl)                                      | HIV | Weekly motivational SMS. Phone number to call for support.                                                                                                                   | ART in PVLA: Self-report.                                    | No difference. (RR=1.06(0.89-1.29); p=0.542) / No impact.                                                                                                                                                                                                                              |
| 27 |                            |                |     |                                                                               |     |                                                                                                                                                                              | ART in PVLA: Pharmacy Refills.                               | No difference at 6 months (MD=0.1(-0.23-0.43); p=0.617) / No impact.                                                                                                                                                                                                                   |
| 28 |                            |                |     |                                                                               |     |                                                                                                                                                                              | Acceptability: Self-report.                                  | 91.1% believed SMS reminders helped; 65% were satisfied; 81.2% would recommend to a friend / Highly acceptable.                                                                                                                                                                        |



|    |                      |                      |                             |                                                                                  |     |                                                                                                                       |                                                                           |                                                                                                                                                                                                                                                                                |
|----|----------------------|----------------------|-----------------------------|----------------------------------------------------------------------------------|-----|-----------------------------------------------------------------------------------------------------------------------|---------------------------------------------------------------------------|--------------------------------------------------------------------------------------------------------------------------------------------------------------------------------------------------------------------------------------------------------------------------------|
| 1  | SMS                  | Moore 2015           | RCT                         | HIV+ bipolar 18+ yrs, USA.<br>n=25(Int) n=25(Ctrl)                               | HIV | SMS reminders.                                                                                                        | ART in PVLA: MEM.                                                         | No difference. (86.2% (SD= 12.7) vs. 84.8% (SD= 18.1); p=0.95; d=0.01) / No impact.                                                                                                                                                                                            |
| 2  |                      |                      |                             |                                                                                  |     |                                                                                                                       |                                                                           |                                                                                                                                                                                                                                                                                |
| 3  | SMS                  | Nsagha 2016          | RCT.                        | HIV+ on ART, 18+yrs, CMR<br>n=45 (Int)<br>n=45 (Ctrl)                            | HIV | 4 weekly educative SMS over 1M.                                                                                       | ART in PVLA: Self-report.<br>Acceptability: Self-report.                  | Nonsignificant difference in adherence to ART at 1M between the 2 groups (64.4% vs 44.2%, p=0.056) / No impact.<br>57.8% wished the SMS to continue/ Moderately acceptable                                                                                                     |
| 4  |                      |                      |                             |                                                                                  |     |                                                                                                                       |                                                                           |                                                                                                                                                                                                                                                                                |
| 5  |                      |                      |                             |                                                                                  |     |                                                                                                                       |                                                                           |                                                                                                                                                                                                                                                                                |
| 6  |                      |                      |                             |                                                                                  |     |                                                                                                                       |                                                                           |                                                                                                                                                                                                                                                                                |
| 7  | SMS                  | Pop-Eleches 2010     | RCT                         | HIV+ 18+ yrs, rural KEN.<br>n=142(Daily SMS)<br>n=147(Weekly SMS)<br>n=139(Ctrl) | HIV | Daily or weekly SMS.                                                                                                  | ART in PVLA: MEM.<br>ART in PVLA: MEM.                                    | Increased adherence in weekly SMS group over 48W (53% vs. 40% p=0.03) / Effective.<br>No difference between daily SMS group and Ctrl (41% vs. 40% p=0.92) / No impact.                                                                                                         |
| 8  |                      |                      |                             |                                                                                  |     |                                                                                                                       |                                                                           |                                                                                                                                                                                                                                                                                |
| 9  |                      |                      |                             |                                                                                  |     |                                                                                                                       |                                                                           |                                                                                                                                                                                                                                                                                |
| 10 |                      |                      |                             |                                                                                  |     |                                                                                                                       |                                                                           |                                                                                                                                                                                                                                                                                |
| 11 |                      |                      |                             |                                                                                  |     |                                                                                                                       |                                                                           |                                                                                                                                                                                                                                                                                |
| 12 | SMS + cash incentive | Rana 2016            | UnCtrlled trial.            | HIV+, 18+yrs, USA.<br>n=32                                                       | HIV | Bi-directional weekly SMS appointment reminders, daily ART reminder & supportive messages.                            | ART in PVLA: Undetectable VL<br>ATT treatment: Attendance rate.           | Significant increase in the number of participants with undetectable VL at 6M (25 vs. 18, p=0.002) / Effective.<br>20/32 completed all visits within 6M study period.                                                                                                          |
| 13 |                      |                      |                             |                                                                                  |     |                                                                                                                       |                                                                           |                                                                                                                                                                                                                                                                                |
| 14 |                      |                      |                             |                                                                                  |     |                                                                                                                       |                                                                           |                                                                                                                                                                                                                                                                                |
| 15 |                      |                      |                             |                                                                                  |     |                                                                                                                       |                                                                           |                                                                                                                                                                                                                                                                                |
| 16 |                      |                      |                             |                                                                                  |     |                                                                                                                       |                                                                           |                                                                                                                                                                                                                                                                                |
| 17 | SMS                  | Sabin 2015           | RCT                         | HIV+ 18+ yrs, in CHN. n=63(Int)<br>n=56(Ctrl)                                    | HIV | SMS reminders via MEM + adherence counselling.                                                                        | ART in PVLA: MEM.<br>ART in PVLA: VL.                                     | Increased adherence over 6M (82% vs. 51.8%; RR=1.59(1.21- 2.10), p<0.001) / Effective.<br>No difference in undetectable VL (93.6% vs. 98.2%, p=0.218) / No impact.                                                                                                             |
| 18 |                      |                      |                             |                                                                                  |     |                                                                                                                       |                                                                           |                                                                                                                                                                                                                                                                                |
| 19 |                      |                      |                             |                                                                                  |     |                                                                                                                       |                                                                           |                                                                                                                                                                                                                                                                                |
| 20 |                      |                      |                             |                                                                                  |     |                                                                                                                       |                                                                           |                                                                                                                                                                                                                                                                                |
| 21 |                      |                      |                             |                                                                                  |     |                                                                                                                       |                                                                           |                                                                                                                                                                                                                                                                                |
| 22 |                      |                      |                             |                                                                                  |     |                                                                                                                       |                                                                           |                                                                                                                                                                                                                                                                                |
| 23 | BC + MMS.            | Shet 2014            | RCT                         | HIV+ 18-60 yrs, IND. n=315(Int)<br>n=316(Ctrl)                                   | HIV | Weekly automated motivational voice call, followed by weekly MMS.                                                     | ART in TNPs: VL.<br>ART in TNPs: Pill count.<br>Feasibility: PC received. | No difference. (Number of virological failures: 15.6% vs. 15.5%. Time to virological failure: aHR= 0.96(0.65-1.43), p= 0.85) / No impact.<br>No difference. (27% vs. 21.7%; aIRR=1.24(0.94-1.63), p=0.13) / No impact.<br>86% of calls received by patients / Highly feasible. |
| 24 |                      |                      |                             |                                                                                  |     |                                                                                                                       |                                                                           |                                                                                                                                                                                                                                                                                |
| 25 |                      |                      |                             |                                                                                  |     |                                                                                                                       |                                                                           |                                                                                                                                                                                                                                                                                |
| 26 |                      |                      |                             |                                                                                  |     |                                                                                                                       |                                                                           |                                                                                                                                                                                                                                                                                |
| 27 |                      |                      |                             |                                                                                  |     |                                                                                                                       |                                                                           |                                                                                                                                                                                                                                                                                |
| 28 |                      |                      |                             |                                                                                  |     |                                                                                                                       |                                                                           |                                                                                                                                                                                                                                                                                |
| 29 | SMS                  | Walsh 2012           | UnCtrlled trial.            | HIV+ Adults on ART, GBR. n=14                                                    | HIV | Pill-box w/ MEM + weekly SMS wrt med taking + up to 3 late dose SMS reminders.                                        | ART in APs: Self-report + MEM.<br>Acceptability: Self-report.             | 99.5% baseline adherence, 98% at 24W. No difference in missed doses (4.8% in 0-12W; 6.3% in 13-24W)<br>64% satisfied, 50% found SMS & system useful. 55% found reminders irritating / Moderately acceptable.                                                                   |
| 30 |                      |                      |                             |                                                                                  |     |                                                                                                                       |                                                                           |                                                                                                                                                                                                                                                                                |
| 31 |                      |                      |                             |                                                                                  |     |                                                                                                                       |                                                                           |                                                                                                                                                                                                                                                                                |
| 32 |                      |                      |                             |                                                                                  |     |                                                                                                                       |                                                                           |                                                                                                                                                                                                                                                                                |
| 33 | SMS                  | Lim 2008             | Quasi-experimental: HxCtrl. | STI clinic, NZL. n=293(Int)<br>n=303(HxCtrl)                                     | CT  | SMS to contact clinic for CT test result.                                                                             | TAT: Time from test to treat.                                             | No change in median time to treat (3 days vs. 4 days, t = - 1.3, p<0.1) / No impact.                                                                                                                                                                                           |
| 34 |                      |                      |                             |                                                                                  |     |                                                                                                                       |                                                                           |                                                                                                                                                                                                                                                                                |
| 35 |                      |                      |                             |                                                                                  |     |                                                                                                                       |                                                                           |                                                                                                                                                                                                                                                                                |
| 36 | SMS                  | Menon-Johansson 2006 | Quasi-experimental.         | At clinic w/untreated CT, GBR. n=28(Int)<br>n=21(Ctrl)                           | CT  | SMS to contact clinic for CT test result.                                                                             | TAT: Time from test to diagnosis & test to treat.                         | Shorter mean time to diagnosis. (7.9 days vs. 12.5; p<0.001)<br>Shorter median time to treat. (8.5 days vs. 15; p=0.005) / Effective.                                                                                                                                          |
| 37 |                      |                      |                             |                                                                                  |     |                                                                                                                       |                                                                           |                                                                                                                                                                                                                                                                                |
| 38 |                      |                      |                             |                                                                                  |     |                                                                                                                       |                                                                           |                                                                                                                                                                                                                                                                                |
| 39 | SMS+PC               | Barnabas 2016        | RCT                         | 16-49 yrs., ZAF & UGA. n=284(Int)<br>n=224(Ctrl)                                 | HIV | SMS promoting male circumcision 3W, 6-7W after tested negative. Follow-up phone call 1M & 2M following SMS reminders. | PB: Self-report.                                                          | Significant difference in reaching outcome at 3M (Intervention vs clinic referral); 48% (RR=1.72 95% CI 1.36-2.17, p values < 0.0001) in SMS reminder group and 47% (RR=1.67, 95%CI 1.29-2.14, p value = 0.0001) in lay counsellor follow-up achieved MC at 3M / Effective     |
| 40 |                      |                      |                             |                                                                                  |     |                                                                                                                       |                                                                           |                                                                                                                                                                                                                                                                                |
| 41 |                      |                      |                             |                                                                                  |     |                                                                                                                       |                                                                           |                                                                                                                                                                                                                                                                                |
| 42 |                      |                      |                             |                                                                                  |     |                                                                                                                       |                                                                           |                                                                                                                                                                                                                                                                                |
| 43 |                      |                      |                             |                                                                                  |     |                                                                                                                       |                                                                           |                                                                                                                                                                                                                                                                                |
| 44 |                      |                      |                             |                                                                                  |     |                                                                                                                       |                                                                           |                                                                                                                                                                                                                                                                                |
| 45 | SMS + MMS.           | Cornelius 2013       | UnCtrlled trial.            | African-Americans age 13-18, USA. n=40                                           | HIV | HIV-prevention SMS + knowledge question for                                                                           | PB: Self-report.                                                          | Improved condom attitudes & HIV knowledge (83% vs.78% correct answers) / No impact.                                                                                                                                                                                            |
| 46 |                      |                      |                             |                                                                                  |     |                                                                                                                       |                                                                           |                                                                                                                                                                                                                                                                                |
| 47 |                      |                      |                             |                                                                                  |     |                                                                                                                       |                                                                           |                                                                                                                                                                                                                                                                                |
| 48 |                      |                      |                             |                                                                                  |     |                                                                                                                       |                                                                           |                                                                                                                                                                                                                                                                                |
| 49 |                      |                      |                             |                                                                                  |     |                                                                                                                       |                                                                           |                                                                                                                                                                                                                                                                                |

|    |                      |                   |                               |                                                                         |     |                                                                               |                                                                                                                                                                                                                                                                                                                        |
|----|----------------------|-------------------|-------------------------------|-------------------------------------------------------------------------|-----|-------------------------------------------------------------------------------|------------------------------------------------------------------------------------------------------------------------------------------------------------------------------------------------------------------------------------------------------------------------------------------------------------------------|
| 1  |                      |                   |                               |                                                                         | 3W. | Acceptability: Self-report.                                                   | 97% satisfied w/ number of SMS. 86% reported SMS not interfering w/ daily activities/ Highly acceptable.                                                                                                                                                                                                               |
| 2  |                      |                   |                               |                                                                         |     | Feasibility: Completion rate.                                                 | 100% at pretest; 90% at 3M FU/ Highly feasible.                                                                                                                                                                                                                                                                        |
| 3  |                      |                   |                               |                                                                         |     |                                                                               |                                                                                                                                                                                                                                                                                                                        |
| 4  | PC                   | DiClemente 2014   | RCT                           | High-risk African-American women 14-20 yrs, USA. n=342(Int) n=359(Ctrl) | CT  | PC w/ prevention messages every 8W.                                           | PB: % diagnosed w/ CT or GC. Fewer participants diagnosed w/ CT & GC (90 vs. 104; RR = 0.5 (0.28-0.88), p=0.02. 48 vs. 54; RR = 0.4 (0.15-1.02), p=0.06) / Effective. PB: Self-report. Higher condom use (MD=0.08(0.06 to 0.10) p=0.04) / Effective.                                                                   |
| 5  |                      |                   |                               |                                                                         |     |                                                                               |                                                                                                                                                                                                                                                                                                                        |
| 6  |                      |                   |                               |                                                                         |     |                                                                               |                                                                                                                                                                                                                                                                                                                        |
| 7  |                      |                   |                               |                                                                         |     |                                                                               |                                                                                                                                                                                                                                                                                                                        |
| 8  | SMS + cash incentive | Juzang 2011       | Non-randomized Ctrlled trial. | African-American men 16-20 yrs, USA. n=30/group                         | HIV | 3 weekly SMS HIV prevention messages + \$40 for completion.                   | PB: Self-report. No statistical difference in % of protected sex. Higher awareness of sexual health / No impact. Feasibility: Retention rate. 20 (67%) retained in Ctrl & 19 (63%) in SMS group after 2nd FU / Moderately feasible.                                                                                    |
| 9  |                      |                   |                               |                                                                         |     |                                                                               |                                                                                                                                                                                                                                                                                                                        |
| 10 |                      |                   |                               |                                                                         |     |                                                                               |                                                                                                                                                                                                                                                                                                                        |
| 11 |                      |                   |                               |                                                                         |     |                                                                               |                                                                                                                                                                                                                                                                                                                        |
| 12 | SMS                  | Odeny 2014        | RCT                           | Circumcised male at clinic, 18+ yrs, KE. n=600(Int) n=600(Ctrl)         | HIV | Daily SMS for 1wk + SMS on days 8, 14, 21, 28, 35, 41, and 42 post-procedure. | PB: Self-report. Abstinence of sexual activity before 42-day follow up: 139/491(28.3%) vs. 124/493(25.2%) in control group (RR=1.13(0.91-1.38), p=0.3)/ No impact.                                                                                                                                                     |
| 13 |                      |                   |                               |                                                                         |     |                                                                               |                                                                                                                                                                                                                                                                                                                        |
| 14 |                      |                   |                               |                                                                         |     |                                                                               |                                                                                                                                                                                                                                                                                                                        |
| 15 |                      |                   |                               |                                                                         |     |                                                                               |                                                                                                                                                                                                                                                                                                                        |
| 16 | SMS                  | Reback 2015       | UnCtrlled trial.              | MSM drug users 18-65 yrs, USA. n=52                                     | HIV | Daily SMS for 2W to reduce risky sexual behaviours.                           | PB: Self-report. Reduction in anal sex (6.9 vs. 2.6, t97=2.82, p<0.05) and unprotected anal sex (1.8 vs. 0.5, t97=2.19, p<0.05) in past 2M/ Effective.                                                                                                                                                                 |
| 17 |                      |                   |                               |                                                                         |     |                                                                               |                                                                                                                                                                                                                                                                                                                        |
| 18 |                      |                   |                               |                                                                         |     |                                                                               |                                                                                                                                                                                                                                                                                                                        |
| 19 | PC                   | Belzer 2015       | RCT                           | HIV+ 12-29 yrs, USA. n=19(Int) n=18(Ctrl)                               | HIV | PC 1hr from time to take medication.                                          | Acceptability: Self-report. 94% satisfied w/ call length and 81% would continue receiving calls / Highly acceptable. Feasibility: Retention rate. 63% retention rate / Moderately feasible.                                                                                                                            |
| 20 |                      |                   |                               |                                                                         |     |                                                                               |                                                                                                                                                                                                                                                                                                                        |
| 21 |                      |                   |                               |                                                                         |     |                                                                               |                                                                                                                                                                                                                                                                                                                        |
| 22 |                      |                   |                               |                                                                         |     |                                                                               |                                                                                                                                                                                                                                                                                                                        |
| 23 | SMS                  | Dean 2012         | Feasibility study.            | HIV+ at antenatal clinics, ZAF. n=7                                     | HIV | SMS support group+ inquiries answered by physicians.                          | Acceptability: Self-report. Overall satisfaction. Feasibility: Self-report. SMS easily kept confidential.                                                                                                                                                                                                              |
| 24 |                      |                   |                               |                                                                         |     |                                                                               |                                                                                                                                                                                                                                                                                                                        |
| 25 |                      |                   |                               |                                                                         |     |                                                                               |                                                                                                                                                                                                                                                                                                                        |
| 26 |                      |                   |                               |                                                                         |     |                                                                               |                                                                                                                                                                                                                                                                                                                        |
| 27 | SMS                  | Roth 2014         | Feasibility study.            | Sex workers 18+ yrs, USA. n=26                                          | HIV | Cell phone diaries to collect info about sexual events.                       | Acceptability: Self-report. Cell-phone electronic dairies to collect sensitive information acceptable (84.6%)/ Highly acceptable. Feasibility: Completion rate. 90.3% surveys completed / Highly feasible.                                                                                                             |
| 28 |                      |                   |                               |                                                                         |     |                                                                               |                                                                                                                                                                                                                                                                                                                        |
| 29 |                      |                   |                               |                                                                         |     |                                                                               |                                                                                                                                                                                                                                                                                                                        |
| 30 |                      |                   |                               |                                                                         |     |                                                                               |                                                                                                                                                                                                                                                                                                                        |
| 31 | SMS                  | Georgette 2016    | Feasibility study.            | ≥18yrs, HIV+, ZAF. n=88                                                 | HIV | Weekly SMS reminders to increase ART adherence and appointment reminders      | Acceptability: Self-report. 92% would recommend SMS program to a friend, 90.9% said frequency of SMS was just right, 2/88 felt the SMS program slightly violated their privacy. 97.7% reported it helped them remember to take medication. 77.3% agreed that it helped them remember appointments. / Highly acceptable |
| 32 |                      |                   |                               |                                                                         |     |                                                                               |                                                                                                                                                                                                                                                                                                                        |
| 33 |                      |                   |                               |                                                                         |     |                                                                               |                                                                                                                                                                                                                                                                                                                        |
| 34 |                      |                   |                               |                                                                         |     |                                                                               |                                                                                                                                                                                                                                                                                                                        |
| 35 | SMS                  | Reid 2014         | Cross-sectional study.        | HIV+, BWA. n=42(Int) n=41(Ctrl)                                         | HIV | SMS ARV pick-up reminder.                                                     | Acceptability: Self-report. SMS helpful 93% (Int) vs. 58% (Ctrl) (p<0.001). SMS may lead to serostatus disclosure 10% vs. 56% (p<0.001). 95% satisfied w/ appointment scheduling. 90% would continue receiving SMS / Highly acceptable.                                                                                |
| 36 |                      |                   |                               |                                                                         |     |                                                                               |                                                                                                                                                                                                                                                                                                                        |
| 37 |                      |                   |                               |                                                                         |     |                                                                               |                                                                                                                                                                                                                                                                                                                        |
| 38 | PC                   | Bauermeister 2014 | Feasibility study.            | MSM 18-30, USA. n=124                                                   | HIV | IVRS: microbicide use.                                                        | Feasibility: Self-report. 75.5% reported no problems using IVRS / Highly feasible.                                                                                                                                                                                                                                     |
| 39 |                      |                   |                               |                                                                         |     |                                                                               |                                                                                                                                                                                                                                                                                                                        |
| 40 | SMS + MMS.           | Cornelius 2011    | Feasibility study.            | African-Americans age 13-18, USA. n=12                                  | HIV | HIV-prevention SMS+knowledge question for 3W.                                 | Feasibility: Response rate. 80% response rate/ Highly feasible.                                                                                                                                                                                                                                                        |
| 41 |                      |                   |                               |                                                                         |     |                                                                               |                                                                                                                                                                                                                                                                                                                        |
| 42 |                      |                   |                               |                                                                         |     |                                                                               |                                                                                                                                                                                                                                                                                                                        |

Note: Int= intervention; Ctrl= control; HxCtrl= historical control; PB= preventative behaviors (i.e. risk reduction); PN= partner notification; TAT= turnaround time; ATT= attendance rate; ART= ART adherence; NAPs= non-adherent patients; AP= adherent patients; PVLA= Patients with various levels of adherence; TNPs= Treatment naive patients; VL= viral load; CD4= CD4 cell count; PC= phone call; FB= Facebook.

1  
2  
3  
4  
5  
6  
7  
8  
9  
10  
11  
12  
13  
14  
15  
16  
17  
18  
19  
20  
21  
22  
23  
24  
25  
26  
27  
28  
29  
30  
31  
32  
33  
34  
35  
36  
37  
38  
39  
40  
41  
42  
43  
44  
45  
46  
47  
48  
49  
50  
51  
52  
53  
54  
55  
56  
57  
58  
59  
60

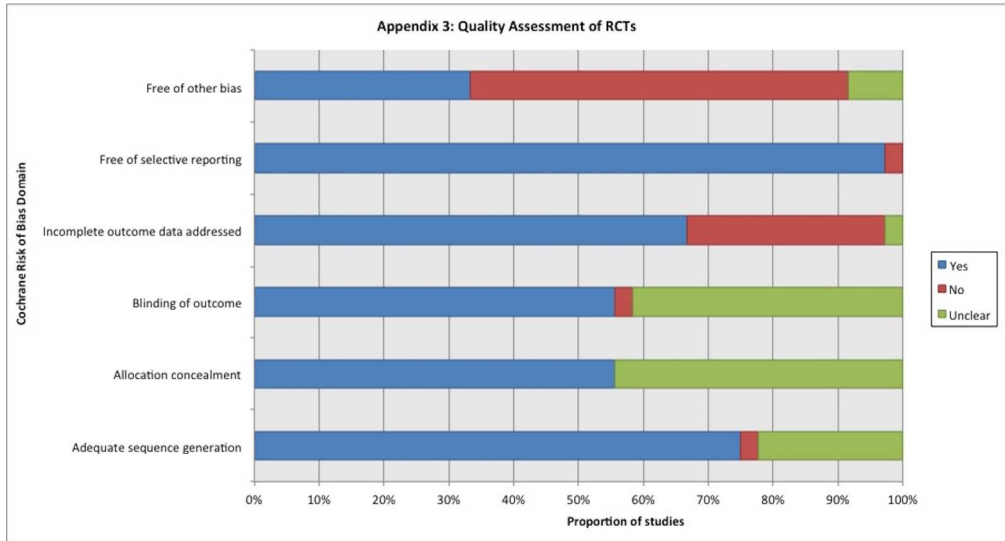

317x171mm (300 x 300 DPI)

review only

1  
2  
3  
4  
5  
6  
7  
8  
9  
10  
11  
12  
13  
14  
15  
16  
17  
18  
19  
20  
21  
22  
23  
24  
25  
26  
27  
28  
29  
30  
31  
32  
33  
34  
35  
36  
37  
38  
39  
40  
41  
42  
43  
44  
45  
46  
47  
48  
49  
50  
51  
52  
53  
54  
55  
56  
57  
58  
59  
60

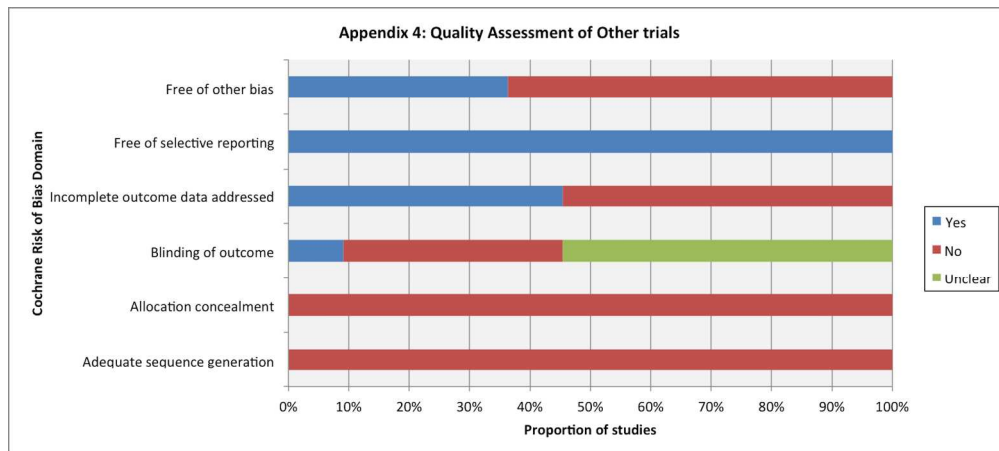

281x126mm (300 x 300 DPI)

er review only

1  
2  
3  
4  
5  
6  
7  
8  
9  
10  
11  
12  
13  
14  
15  
16  
17  
18  
19  
20  
21  
22  
23  
24  
25  
26  
27  
28  
29  
30  
31  
32  
33  
34  
35  
36  
37  
38  
39  
40  
41  
42  
43  
44  
45  
46  
47  
48  
49  
50  
51  
52  
53  
54  
55  
56  
57  
58  
59  
60

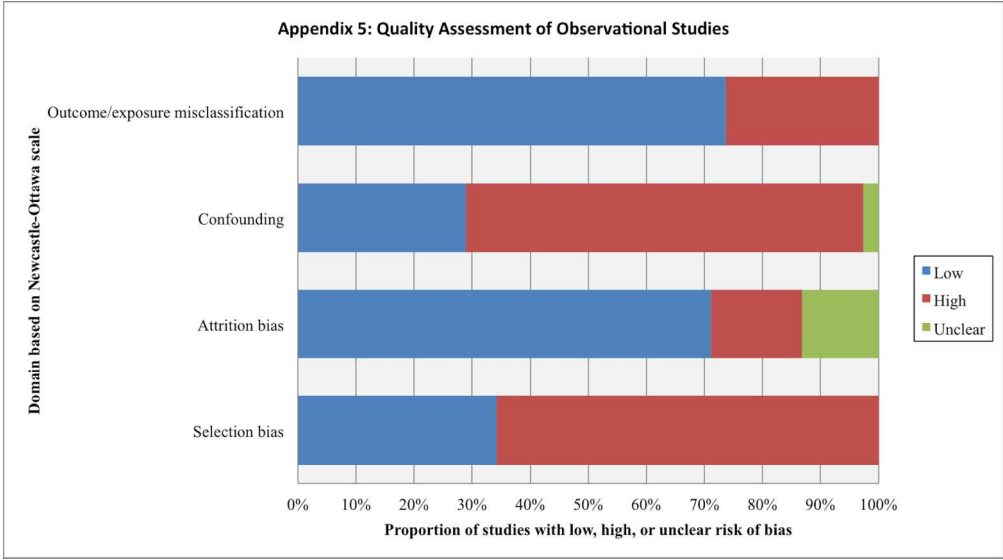

260x145mm (300 x 300 DPI)

review only

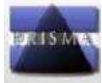

# PRISMA 2009 Checklist

1  
2  
3  
4  
5  
6  
7  
8  
9  
10  
11  
12  
13  
14  
15  
16  
17  
18  
19  
20  
21  
22  
23  
24  
25  
26  
27  
28  
29  
30  
31  
32  
33  
34  
35  
36  
37  
38  
39  
40  
41  
42  
43  
44  
45  
46  
47  
48  
49

| Section/topic                      | #  | Checklist item                                                                                                                                                                                                                                                                                              | Reported on page # |
|------------------------------------|----|-------------------------------------------------------------------------------------------------------------------------------------------------------------------------------------------------------------------------------------------------------------------------------------------------------------|--------------------|
| <b>TITLE</b>                       |    |                                                                                                                                                                                                                                                                                                             |                    |
| Title                              | 1  | Identify the report as a systematic review, meta-analysis, or both.                                                                                                                                                                                                                                         | 1                  |
| <b>ABSTRACT</b>                    |    |                                                                                                                                                                                                                                                                                                             |                    |
| Structured summary                 | 2  | Provide a structured summary including, as applicable: background; objectives; data sources; study eligibility criteria, participants, and interventions; study appraisal and synthesis methods; results; limitations; conclusions and implications of key findings; systematic review registration number. | 2                  |
| <b>INTRODUCTION</b>                |    |                                                                                                                                                                                                                                                                                                             |                    |
| Rationale                          | 3  | Describe the rationale for the review in the context of what is already known.                                                                                                                                                                                                                              | 3                  |
| Objectives                         | 4  | Provide an explicit statement of questions being addressed with reference to participants, interventions, comparisons, outcomes, and study design (PICOS).                                                                                                                                                  | 3                  |
| <b>METHODS</b>                     |    |                                                                                                                                                                                                                                                                                                             |                    |
| Protocol and registration          | 5  | Indicate if a review protocol exists, if and where it can be accessed (e.g., Web address), and, if available, provide registration information including registration number.                                                                                                                               | N/A                |
| Eligibility criteria               | 6  | Specify study characteristics (e.g., PICOS, length of follow-up) and report characteristics (e.g., years considered, language, publication status) used as criteria for eligibility, giving rationale.                                                                                                      | 4                  |
| Information sources                | 7  | Describe all information sources (e.g., databases with dates of coverage, contact with study authors to identify additional studies) in the search and date last searched.                                                                                                                                  | 4                  |
| Search                             | 8  | Present full electronic search strategy for at least one database, including any limits used, such that it could be repeated.                                                                                                                                                                               | 4                  |
| Study selection                    | 9  | State the process for selecting studies (i.e., screening, eligibility, included in systematic review, and, if applicable, included in the meta-analysis).                                                                                                                                                   | 4                  |
| Data collection process            | 10 | Describe method of data extraction from reports (e.g., piloted forms, independently, in duplicate) and any processes for obtaining and confirming data from investigators.                                                                                                                                  | 4                  |
| Data items                         | 11 | List and define all variables for which data were sought (e.g., PICOS, funding sources) and any assumptions and simplifications made.                                                                                                                                                                       | 4                  |
| Risk of bias in individual studies | 12 | Describe methods used for assessing risk of bias of individual studies (including specification of whether this was done at the study or outcome level), and how this information is to be used in any data synthesis.                                                                                      | 5                  |
| Summary measures                   | 13 | State the principal summary measures (e.g., risk ratio, difference in means).                                                                                                                                                                                                                               | 5                  |
| Synthesis of results               | 14 | Describe the methods of handling data and combining results of studies, if done, including measures of consistency (e.g., $I^2$ for each meta-analysis).                                                                                                                                                    | 4                  |



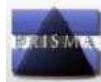

# PRISMA 2009 Checklist

Page 1 of 2

| Section/topic                 | #  | Checklist item                                                                                                                                                                                           | Reported on page # |
|-------------------------------|----|----------------------------------------------------------------------------------------------------------------------------------------------------------------------------------------------------------|--------------------|
| Risk of bias across studies   | 15 | Specify any assessment of risk of bias that may affect the cumulative evidence (e.g., publication bias, selective reporting within studies).                                                             | 5                  |
| Additional analyses           | 16 | Describe methods of additional analyses (e.g., sensitivity or subgroup analyses, meta-regression), if done, indicating which were pre-specified.                                                         | 4                  |
| <b>RESULTS</b>                |    |                                                                                                                                                                                                          |                    |
| Study selection               | 17 | Give numbers of studies screened, assessed for eligibility, and included in the review, with reasons for exclusions at each stage, ideally with a flow diagram.                                          | 5                  |
| Study characteristics         | 18 | For each study, present characteristics for which data were extracted (e.g., study size, PICOS, follow-up period) and provide the citations.                                                             | Abstraction Table  |
| Risk of bias within studies   | 19 | Present data on risk of bias of each study and, if available, any outcome level assessment (see item 12).                                                                                                | 8                  |
| Results of individual studies | 20 | For all outcomes considered (benefits or harms), present, for each study: (a) simple summary data for each intervention group (b) effect estimates and confidence intervals, ideally with a forest plot. | 6                  |
| Synthesis of results          | 21 | Present results of each meta-analysis done, including confidence intervals and measures of consistency.                                                                                                  | 6                  |
| Risk of bias across studies   | 22 | Present results of any assessment of risk of bias across studies (see Item 15).                                                                                                                          | 8, Supplementary   |
| Additional analysis           | 23 | Give results of additional analyses, if done (e.g., sensitivity or subgroup analyses, meta-regression [see Item 16]).                                                                                    | 6                  |
| <b>DISCUSSION</b>             |    |                                                                                                                                                                                                          |                    |
| Summary of evidence           | 24 | Summarize the main findings including the strength of evidence for each main outcome; consider their relevance to key groups (e.g., healthcare providers, users, and policy makers).                     | 8                  |
| Limitations                   | 25 | Discuss limitations at study and outcome level (e.g., risk of bias), and at review-level (e.g., incomplete retrieval of identified research, reporting bias).                                            | 10                 |
| Conclusions                   | 26 | Provide a general interpretation of the results in the context of other evidence, and implications for future research.                                                                                  | 10                 |
| <b>FUNDING</b>                |    |                                                                                                                                                                                                          |                    |
| Funding                       | 27 | Describe sources of funding for the systematic review and other support (e.g., supply of data); role of funders for the systematic review.                                                               | 2                  |

From: Moher D, Liberati A, Tetzlaff J, Altman DG, The PRISMA Group (2009). Preferred Reporting Items for Systematic Reviews and Meta-Analyses: The PRISMA Statement. PLoS Med 6(7): e1000097. doi:10.1371/journal.pmed1000097

For peer review only - <http://bmjopen.bmj.com/site/about/guidelines.xhtml>

For more information, visit: [www.prisma-statement.org](http://www.prisma-statement.org).

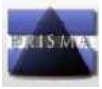

# PRISMA 2009 Checklist

For peer review only

1  
2  
3  
4  
5  
6  
7  
8  
9  
10  
11  
12  
13  
14  
15  
16  
17  
18  
19  
20  
21  
22  
23  
24  
25  
26  
27  
28  
29  
30  
31  
32  
33  
34  
35  
36  
37  
38  
39  
40  
41  
42  
43  
44  
45  
46  
47  
48  
49

# BMJ Open

## Do Digital Innovations for HIV and Sexually Transmitted Infections work? Results from a Systematic Review (1996-2017).

|                                 |                                                                                                                                                                                                                                                                                                                                                                                                                                                                                                                                  |
|---------------------------------|----------------------------------------------------------------------------------------------------------------------------------------------------------------------------------------------------------------------------------------------------------------------------------------------------------------------------------------------------------------------------------------------------------------------------------------------------------------------------------------------------------------------------------|
| Journal:                        | <i>BMJ Open</i>                                                                                                                                                                                                                                                                                                                                                                                                                                                                                                                  |
| Manuscript ID                   | bmjopen-2017-017604.R1                                                                                                                                                                                                                                                                                                                                                                                                                                                                                                           |
| Article Type:                   | Research                                                                                                                                                                                                                                                                                                                                                                                                                                                                                                                         |
| Date Submitted by the Author:   | 03-Aug-2017                                                                                                                                                                                                                                                                                                                                                                                                                                                                                                                      |
| Complete List of Authors:       | Daher, Jana; Research Institute of the McGill University Health Centre<br>Vijh, Rohit; Research Institute of the McGill University Health Centre<br>Linthwaite, Blake; Research Institute of the McGill University Health Centre<br>Dave, Saily; Research Institute of the McGill University Health Centre<br>Kim, John; National HIV/AIDS Labs, Public Health Agency of Canada<br>Dheda, Keertan; University of Cape Town<br>Peter, Trevor; Clinton Health Access Initiative (CHAI)<br>Pai, Nitika; McGill University, Medicine |
| <b>Primary Subject Heading</b>: | HIV/AIDS                                                                                                                                                                                                                                                                                                                                                                                                                                                                                                                         |
| Secondary Subject Heading:      | Health services research, Global health                                                                                                                                                                                                                                                                                                                                                                                                                                                                                          |
| Keywords:                       | mHealth/eHealth, Innovations, HIV, Sexually transmitted Infections, systematic reviews                                                                                                                                                                                                                                                                                                                                                                                                                                           |
|                                 |                                                                                                                                                                                                                                                                                                                                                                                                                                                                                                                                  |

SCHOLARONE™  
Manuscripts

only

1  
2  
3 Do Digital Innovations for HIV and Sexually Transmitted Infections work? Results from a  
4 Systematic Review (1996-2017).  
5  
6  
7

8 Jana Daher<sup>1</sup>, MSc (PH), Rohit Viji<sup>1</sup>, BSc, Blake Linthwaite<sup>1</sup>, BSc, Saily Dave<sup>1</sup>, BSc,  
9 John Kim<sup>2</sup>, PhD, Keertan Dheda<sup>3</sup>, MBBCh, PhD, Trevor Peter<sup>4</sup>, PhD,  
10 Nitika Pant Pai<sup>1,5</sup>, MD PhD  
11  
12  
13  
14

15  
16  
17 Affiliations:

18  
19 <sup>1</sup> Division of Clinical Epidemiology, Research Institute of the McGill University Health Centre,  
20 Montreal, Canada.  
21

22 <sup>2</sup> Chief, National HIV/AIDS Labs, National Labs, Winnipeg, Canada.  
23

24 <sup>3</sup> Professor, Department of Pulmonology, UCT Lung Institute, University of Cape Town, South  
25 Africa.  
26

27 <sup>4</sup> Scientific Director, Diagnostics, Clinton Health Access Initiative (CHAI), Boston, USA.  
28

29 <sup>1,5</sup> Associate Professor, Department of Medicine, McGill University, Montreal, Canada.  
30  
31  
32

33 Corresponding author:

34 [nitika.pai@mcgill.ca](mailto:nitika.pai@mcgill.ca)  
35  
36

37 Address: 5252 boul de Maisonneuve West, Division of Clinical Epidemiology, McGill  
38 University Health Center, Montreal, Quebec, H4A 3S5  
39

40 Telephone number: 514-934-1934 x44729  
41

42 Keywords: mHealth/eHealth; Innovations; HIV; Sexually transmitted Infections; systematic  
43 reviews, meta-analyses.  
44  
45  
46  
47  
48  
49  
50  
51

---

## ABSTRACT

---

**Objective:** Digital innovations with internet/mobile phones offer a potential cost saving solution for overburdened health systems with high service delivery costs to improve efficiency of HIV/STI control initiatives. However, their overall evidence has not yet been appraised. We evaluated the feasibility and impact of all digital innovations for all HIV/STIs.

**Design:** Systematic review.

**Setting/Participants:** All settings/all participants.

**Intervention:** We classified digital innovations into: a) Mobile health-based (mHealth: SMS (short message service)/phone calls), b) Internet-based mobile and/or electronic health (m/eHealth: social media, avatar-guided computer programs, websites, mobile applications, streamed soap opera videos), and c) combined innovations (included both SMS/phone calls and internet-based m/eHealth).

**Primary and secondary outcome measures:** Feasibility, Acceptability, Impact.

**Methods:** We searched Databases- MEDLINE via PubMed, Embase, Cochrane CENTRAL, and Web of Science, abstracted data, explored heterogeneity, performed a random effects subgroup analysis.

**Results:** We reviewed 99 studies, 63 (64%) were from America/Europe, 36 (36%) from Africa/Asia; 79% (79/99) were clinical trials; 84% (83/99) evaluated impact. Of innovations, mHealth-based: 70% (69/99); internet-based: 21% (21/99); combined: 9% (9/99). All digital innovations were highly accepted (26/31; 84%), feasible (20/31; 65%). Regarding impacted measures: mHealth-based innovations (SMS) significantly improved ART adherence (pooled OR=2.15 [95%CI: 1.18, 3.91]), and clinic attendance rates (pooled OR=1.76 [95%CI: 1.28, 2.42]); Internet-based innovations improved clinic attendance (6/6), ART adherence (4/4), self-care (1/1), while reducing risk (5/5); combined innovations increased clinic attendance, ART adherence, partner notifications, and self-care. Confounding (68%) and selection bias (66%) were observed in observational studies and attrition bias in 31% of clinical trials.

**Conclusion:** Digital innovations were acceptable, feasible, and generated impact. A trend towards use of internet-based and combined (internet and mobile) innovations was noted. Large scale up studies of high quality, with new integrated impact metrics, and cost effectiveness are needed. Findings will appeal to all stakeholders in the HIV/STI global initiatives space.

### Strengths of the review

- An updated and comprehensive systematic review/meta-analysis of all innovations in HIV/STI.
- Evaluation of study quality with biases, subgroup analyses and sensitivity analyses.
- Evaluation of metrics and measures for objective and subjective data.

### Limitations of the review

- Limited data were reported from Sub-Saharan Africa and Southeast Asia (29%, 29/99).
- Limited evidence (18/99, 18%) was available for STIs (other than HIV).
- Limited data on cost effectiveness from high burden settings.
- A lack of integrated online impact metrics to evaluate internet-based eHealth innovations.



## INTRODUCTION

---

HIV/STI infections remain a public health concern worldwide - a million new HIV/STI infections are acquired every day, with cumulative disease burden exceeding 500 million infections.<sup>1-5</sup> Regarding HIV, countries are working hard to achieve the new UNAIDS 90-90-90 treatment targets;<sup>6</sup> however, structural and societal barriers such as stigma, low socio-economic status, and geographical isolation, impede access to quality care for marginalized populations who are disproportionately impacted by the HIV/AIDS epidemic.<sup>7-8</sup> Likewise, a lack of timely testing and poor retention in care impairs efforts to control HIV/STIs.<sup>7-10</sup> To improve early testing, linkage and retention in care, health care systems globally are seeking solutions to improve population engagement, awareness, and education, and efficient care for their hard-to-reach populations. It is imperative to plug gaps in health care service delivery.<sup>11-12</sup> Digital innovations such as electronic health (eHealth), mobile health (mHealth), and combined innovations offer promising solutions to improve health service delivery. eHealth encompasses non-internet and internet-enabled mHealth as well as other internet-based health interventions. These innovations, together with expanded mobile and internet networks, global connectivity, and affordability, present opportunities to change the future landscape of health care service delivery.

The World Bank estimates that globally, 96% of the world's population and 70% of the world's poorest have access to a mobile phone.<sup>13</sup> Of seven billion, two billion (30%) individuals own a smartphone; approximately 50% of mobile phone users access the internet through their phones.<sup>14-15</sup> Technological access has created a portal for social media and other internet-based health interventions.<sup>16</sup> A rapid diffusion of mobile phones and internet technologies are prime drivers of this disruptive phenomenon in health, aptly titled, the creative destruction of medicine.<sup>17</sup> In recent years, visionary foundations (*Grameen, Bill and Melinda Gates Foundation, UNAIDS, Vodafone*) have, with funding, created opportunities for innovative thinking in health. To date, ninety-five countries have evaluated some digital health innovations.<sup>11</sup> This is most evident in under-resourced settings where low-cost and sustainable solutions are needed to solve complex global health challenges.<sup>18</sup>

Digital innovations were first used in non-communicable diseases and later became popular in infectious disease.<sup>19</sup> In the field of HIV/STIs, a *Lancet* study demonstrated the effectiveness of mHealth-based SMS innovations on adherence to antiretroviral therapy (ART).<sup>20</sup> As novel digital innovations and strategies continue to be developed and tested, many smaller reviews and systematic reviews were published. However, a vast majority of these reviews only evaluated a single innovation (e.g. SMS, social media), one or two outcomes, and restricted exploration in select sub-groups (people living with HIV (PLHIV), pregnant women, adolescents, men who have sex with men (MSM)).<sup>21-27</sup> These reviews failed to provide a comprehensive summary of all innovations for program planning and research. Due to a rapid expansion of digital innovations, and an increased popularity of combined innovations (2013- ), a need for a comprehensive up-to-date synthesis on all innovations for HIV/STIs was felt.

Our primary objective was to generate a high quality overview/systematic review that summarizes all digital innovations across all populations and outcomes in HIV/STIs. Our

secondary objective was to inform researchers, policy makers, funders with evidence for their decisions on implementation and scale-up.<sup>11</sup>

## METHODS

---

PRISMA (Preferred Reporting Items for Systematic Reviews and Meta-Analyses) and Cochrane guidelines were followed.<sup>28</sup>

### Data Sources and Searches

We searched MEDLINE via PubMed, Embase, Cochrane CENTRAL, and Web of Science for a 21-year period from Feb 1996 up to March 2017, with no language restrictions.

### Search Strategy

Keywords used were HIV, AIDS, STI, mhealth, mobile health, ehealth, telemedicine, mobile applications and social media. For a full search strategy, please refer to Appendix 1. (#1 (“HIV” [MeSH] OR “acquired immunodeficiency syndrome” [tiab]), OR #2 (sexually transmitted infections [mh] OR sexually transmitted disease\* [tiab]), AND #3 (“mHealth” [tiab] OR “mobile health” [tiab] OR short messag\* [tiab] OR “eHealth” [MeSH] OR “telemedicine” [MeSH] OR social medi\* [tiab] OR “mobile applications” [tiab])).

### Study Selection

Two reviewers independently screened and evaluated citations for eligibility (JD & RV) and two others (BL & SD) independently assessed quality. A senior reviewer was consulted (NPP) for discordance.

### Eligibility Criteria

Any clinical trials or observational study designs that evaluated any digital (m/eHealth) technology with any reported outcomes (Refer Figure 1) were included.

### Data Abstraction

Two reviewers (RV, JD) independently abstracted all the data. A pre-piloted data abstraction form, was used to abstract the following items: study design, study population, sample size, digital innovation type, HIV/STIs, outcome measures (e.g. impact, acceptability and feasibility), and metrics (e.g. attendance rate, completion rate, satisfaction) (Refer to Appendix 2). We referred to a previously published framework to define and further classify the following metrics for impact, acceptability, and feasibility.<sup>29</sup>

### Subgroup Pooled Analyses

We classified study designs and then classified digital innovations into three groups:<sup>30</sup>

- a) mHealth (SMS and phone calls only; i.e. non-internet based);
- b) Internet-enabled mHealth and other internet-based eHealth (mobile application, website, online campaign, streamed soap opera videos, avatar-guided computer programs);
- c) Combined innovations (innovations that combined both mHealth (SMS/phone calls) with internet enabled m/eHealth).

1  
2  
3  
4  
5  
6  
7  
8  
9  
10  
11  
12  
13  
14  
15  
16  
17  
18  
19  
20  
21  
22  
23  
24  
25  
26  
27  
28  
29  
30  
31  
32  
33  
34  
35  
36  
37  
38  
39  
40  
41  
42  
43  
44  
45  
46  
47  
48  
49  
50  
51  
52  
53  
54  
55  
56  
57  
58  
59  
60

Only one subgroup reported similar outcomes which could be pooled, SMS and phone calls, for the following outcomes: a) clinic attendance with SMS; and b) ART adherence via Medication Event Monitoring System (MEMS) caps, with SMS. We pooled these outcomes using a random effects subgroup analysis. Given the diversity in the sample populations between studies, we used the Dersimonian and Laird random effects frequentist model, weighted by study sample to calculate a pooled effect. We generated forest plots for visual representation of heterogeneity and pooled odds ratios (OR) with 95% confidence intervals (CI). We performed all statistical analyses using Stata/IC, version 13 (StataCorp, College Station, Texas USA).<sup>31</sup>

### Narrative Analysis

We narratively described all other data using as follows:

Digital innovations were classified into the following groups based on the strength of evidence: high/strong evidence (metrics at 75-100%), moderate evidence (51-74%), and low/weak evidence (50% or less).

**Acceptability:** Acceptability was defined as the receptivity in using digital innovations.

**Feasibility:** Feasibility was defined as the perceived convenience in using digital innovations. It was reported with various metrics: completion, retention, response and referral rates.

**Impact:** Impact was defined as a statistically significant improvement in measured outcomes compared to a comparator group (i.e. control group or baseline observations). The metrics used to evaluate impact were: A) attendance rate, B) ART adherence, C) risk reduction, D) self-care and E) partner notification. Impact measures were evaluated on two criteria: effect size and precision. Effect size was assessed when data on a comparator group was made available. Precision of the effect estimate was assessed whenever reported, as it reflects the variance or spread of results.

### Quality Assessment

We assessed study quality for both clinical trials and observational studies. We used the Cochrane Risk of Bias Tool for trials, and Newcastle-Ottawa quality assessment scale for observational studies.

## RESULTS

---

Of 4252 citations identified through our extensive search, 792 were selected for full-text screening, and 99 citations met our inclusion criteria and were included in this review for evidence synthesis (Refer: Figure 1).

### Study characteristics

By geographical location, 37% (37/99) of studies were conducted in North America, 26% (26/99) in Sub-Saharan Africa, 24% (24/99) in Europe, 7% (7/99) in Oceania, 3% (3/99) in Southeast Asia, and 2% (2/99) in South America.

By study design, the majority were trials: 38% (38/99) were RCTs, 16% (16/99) uncontrolled trials, and 1% (1/99) non-randomised controlled trials. Others included quasi-experimental

1  
2  
3 studies, of which many used historical controls (24%, 24/99), and observational studies (i.e.  
4 cross-sectional and feasibility studies) (20%, 20/99).

5  
6 HIV was the most frequently reported infection (74%, 73/99 studies), followed by  
7 chlamydia/gonorrhoea (CT/GC) (10%, 10/99). Combinations of HIV with STIs (e.g., syphilis)  
8 (8%, 8/99), human papillomavirus (HPV) (4%, 4/99) and hepatitis A/B/C (HBV) (4%, 4/99)  
9 were also reported.

10  
11 In terms of study populations, people living with HIV were prominent across studies (42%,  
12 42/99) followed by other high-risk groups (i.e. MSM/bisexual men, drug users, pregnant  
13 women/mother-infant pairs, African-Americans, sex workers, and visible minorities) (28%,  
14 28/99), general clinic attendees (16%, 16/99), CT/ HBV infected individuals (4%, 4/99), and  
15 residents of a specific area (9%, 9/99).

### 16 17 18 19 **Innovations**

20 Digital innovations were documented across the spectrum.

21  
22 mHealth innovations (SMS/phone calls only) were evaluated in 70% (69/99) of studies.<sup>20 32-99</sup>  
23 72% (50/69) were SMS-based and 28% (19/69) used phone calls or a combination of both (Refer  
24 to Figure 2 and Appendix 3).

25  
26 Internet-enabled mHealth and other internet-based eHealth innovations were evaluated in 21%  
27 (21/99) of studies.<sup>100-120</sup> These innovations consisted of many different forms: social media and  
28 online campaigns (9/21), avatar-guided computer programs (2/21), mobile applications (5/21),  
29 combination of social media and websites (2/21), websites (1/21), telemedicine services (1/21)  
30 and streamed soap opera videos (1/21) (Refer to Figure 2 and Appendix 3).

31  
32 Combined innovations were evaluated in 9% (9/99) of studies.<sup>121-129</sup> Innovations consisted of:  
33 SMS + websites/ interactive websites (4/9), SMS + mobile application (3/9) and SMS + social  
34 media (including online campaigns) (2/9). (Refer to Figure 2 and Appendix 3).

### 35 36 37 38 **Measures and Metrics**

39 A vast majority (84%, 83/99) of studies focused on impact measure and metrics, while about  
40 12% (12/99) focused only on feasibility, and the remaining 4% (4/99) on acceptability. Within  
41 impact measures, metrics such as clinic attendance rates were reported in 45% (37/83) of studies,  
42 followed by ART adherence at 35% (29/83), HIV/STIs risk reduction behaviors at 13% (11/83),  
43 turnaround time from testing to treatment at 2% (2/83), partner notification at 2% (2/83), and  
44 self-care at 2% (2/83).

### 45 46 47 **Analyses:**

#### 48 49 **Subgroup Pooled Analyses**

50 It was possible to perform subgroup analyses on outcomes that were consistently documented:  
51 clinic attendance in 14 quasi-experimental studies that used SMS reminders and MEMS-based  
52 ART adherence in 4 RCTs evaluating SMS. The pooled estimate for the impact of SMS  
53 reminders on attendance rates was 1.76 [95%CI: 1.28, 2.42] (Refer to Figure 3A). The pooled  
54 estimate for the impact of SMS on ART adherence tracked via MEMS caps was also significant,  
55 OR= 2.15 [95%CI: 1.18, 3.91] (Refer to Figure 3B).<sup>32,47-48</sup>

## Narrative Analysis

### Impact

#### Non-internet based mHealth (SMS/PC only)

Of 69 studies, positive results were reported for the following outcomes: clinic attendance (63%, 19/30 studies, of which 84% reached statistical significance); ART adherence (63%, 15/24 studies, of which 93% reached statistical significance); turnaround time from testing to treatment (67%, 2/3 studies). However, SMS reported a limited effect on risk reduction behaviors (3/7, 43%).

#### Internet-based m/eHealth:

Studies evaluating internet-based eHealth innovations (21/99) reported results that were largely in favor of the following innovations: social media-based interventions for clinic attendance; avatar-guided and mobile applications for ART adherence; social media, avatar, and soap opera videos for risk reduction behaviors; mobile app for self-care.

Social media contributed to higher testing uptake rates in all studies (6/6, 100%). A social media-based campaign increased HIV testing by 252% (n= 1500; 19% from baseline 5.4%,  $p<0.01$ ) and Syphilis testing by 248% (18.8% from baseline 5.4%,  $p<0.01$ ), while another campaign increased HIV testing by 52% compared to control (n=625; 63.7% vs. 42% in controls, OR=2.9 [95%CI: 1.8-4.7]).<sup>100,115</sup> Four campaigns guaranteed rapid in-home HIV testing for all those who requested it online.<sup>100-101, 108, 111, 116</sup>

Avatar-guided programs and mobile applications improved ART adherence in all studies (4/4). Statistically significant outcomes were reported in 2/4 programs (50%). These were: a) A personalized avatar-guided computer program improved adherence (n=240;  $p=0.046$ ); b) a mobile application with immunosuppression graphs and medication reminders lowered viral load (n= 28;  $p=0.023$ ) and improved adherence ( $p=0.03$ ) as well.<sup>102,104</sup> In the other two studies, an avatar-guided program improved viral suppression and a mobile application allowed for 100% adherence, but these were underpowered to detect a significant effect (n=76 and n=28, respectively).<sup>107,110</sup>

Social media, avatar and soap opera videos were successful at reducing risky sexual behavior in all the reported studies (5/5). However, significant results were reported in only 3/5 studies: a) Social media-based interventions decreased unprotected sex acts by 65% (n=31; 3.11 vs. baseline 8.96,  $p=0.042$ ); b) soap opera videos on HIV prevention reduced condomless sex by 78% (n=117; 78% reduction from baseline,  $p<0.001$ );<sup>103,106</sup> c) An avatar-guided computer program also lowered the odds of HIV transmission (n=240; OR= 0.46,  $p=0.012$ ).<sup>102-103,106</sup> Even in two underpowered studies, social media-based interventions led to 40% and 67% higher condom uptake (n=70 and n=50, respectively).<sup>105,117</sup>

A mobile application increased self-care in the sole study in this category (1/1). A significantly higher self-care performance among chronic HBV-infected individuals was reported compared to controls (n=53;  $p=0.001$ ).<sup>112</sup>



### Combined innovations:

Studies evaluating combined innovations (9/99) showed success of social media + SMS in increasing clinic attendance and partner notification; interactive websites + SMS in improving ART adherence; and mobile app + SMS in increasing self-care. Among the five impact studies, 80% reported a favorable outcome. An online campaign with SMS services increased CT, GC, and HIV tests uptake by 41%, 91%, and 190%, respectively;<sup>123</sup> an interactive website with SMS reminders improved ART adherence in drug-users (n=20; p=0.02);<sup>121</sup> a social media-based partner notification with SMS increased notified contacts by 144% (63.5% in 2011 from baseline 26% in 2010);<sup>126</sup> and a mobile app with SMS significantly improved self-care performance in HIV-infected individuals compared to baseline (n=19; p=0.002).<sup>129</sup>

### Acceptability and Feasibility

Overall, across studies that assessed acceptability/feasibility, digital innovations were found to be highly acceptable and feasible (75%-100%) in 26/31 and 20/31 studies, respectively. mHealth innovations (SMS/PC only) were highly acceptable and feasible in 81% (13/16) and 75% (12/16) of studies, respectively.

Internet-based m/eHealth innovations were highly acceptable and feasible in 92% (11/12) and 45% (5/11) of studies, respectively. All included innovations (i.e. avatar, mobile app, social media and streamed videos) were highly acceptable.<sup>102-104,-106-107</sup> While avatar-guided programs were rated high on feasibility, social media-based strategies were found to be less feasible<sup>101-103</sup>

Combined innovations were highly acceptable and feasible in 67% (2/3) and 75% (3/4) of studies, respectively.<sup>121,124</sup> The innovations that were rated high involved a combination of SMS and interactive websites.

### Quality

Studies were individually evaluated on quality criteria and biases were noted. Across trials, losses to follow-up were reported in 31% of RCTs and 55% of quasi-trials. Additionally, biases (i.e. misclassification, recall bias) were of concern in 58% of the RCTs and 64% of quasi randomized trials (Refer to Appendix 4 & 5).

In observational studies, confounding (68%) and selection bias (66%) were observed. (Refer to Appendix 6). Studies with small sample sizes, low power or insufficient follow-up time (e.g. 3 weeks or less) sometimes provided contradictory results when objective and subjective metrics evaluated the same outcome.

## DISCUSSION

---

### Summary of findings

Overall, digital innovations reported positive effects on key metrics. We noted a strong positive effect of digital innovations on clinic attendance rates (70%; 26/37), ART adherence (69%; 20/29), risk reduction behaviors (67%; 8/12) and self-care (100%; 2/2). SMS/phone calls were not able to reduce risky sexual behaviours; however social-media based interventions,



1  
2  
3 particularly interactive social media, were effective in reducing risky sexual behaviors.  
4 Acceptability was found to be high for all innovations. Feasibility estimates also remained high  
5 for all innovations, except for social media-based interventions, possibly due to a perceived lack  
6 of privacy and confidentiality. Combined innovations may thus offer promise in plugging this  
7 feasibility gap, with internet-based innovations compensating for limitations in SMS-only  
8 strategies and vice versa.  
9  
10

11 While mHealth (SMS/phone calls only) innovations were highly effective in improving clinic  
12 attendance, ART adherence, and turnaround time from testing to treatment, they did not report  
13 on other outcomes. It should be noted that SMS and phone calls alone failed to reduce risky  
14 sexual behaviors, which was not surprising as it is challenging to reduce risky behaviors with a  
15 prescriptive SMS alone. Population engagement is essential for risk reduction through qualitative  
16 research.  
17  
18

19 While internet-based m/eHealth innovations (social media, avatar-guided computer programs,  
20 mobile apps, and soap opera videos) demonstrated positive evidence on impact metrics, not all  
21 studies reached statistical significance. Those that failed to report a statistically significant  
22 improvement in ART adherence had small sample sizes and were underpowered to detect these  
23 outcomes (n=76 vs. n=240), and had less frequent sessions over a shorter evaluation period (2  
24 sessions over 6 months vs. 4 sessions over 9 months).<sup>102 107</sup> For mobile applications, studies  
25 which reported significant effects recruited participants with varying level of adherence,<sup>104 110</sup>  
26 compared with studies which had high adherence at baseline ( $\geq 95\%$ ) and did not show  
27 significance (due to smaller changes in effect). For social media-based campaigns, the two  
28 studies that did not reach statistical significance in reducing risky sexual behaviors lacked an  
29 interactive component and simply displayed educational material, while the study that showed  
30 significant effect engaged the participants by allowing them to contact professional cognitive  
31 behavioral therapists via live chat sessions.<sup>103 105 117</sup>  
32  
33  
34

35 In terms of quality, confounding and selection bias were noted in observational and quasi-  
36 experimental studies, and loss to follow-up in some trials. Nevertheless, the overall validity of  
37 the findings from this review was not threatened by biases, as a large proportion of our data were  
38 derived from trials. While clinical trials were generally high quality, observational studies were  
39 medium to low quality.  
40  
41

42 Consistent reporting of metrics was lacking, which prevented a comprehensive meta-analysis.  
43 Objectives, end points, metrics, and measures, are equally important in feasibility studies and  
44 must well designed to generate high quality evidence.  
45  
46

47 Our review is an exhaustive assessment of the role of digital innovations in improving prevention  
48 and care for HIV/STIs. Our findings resonate with many smaller systematic reviews, which have  
49 separately evaluated individual components of digital innovation, such as SMS-based  
50 mHealth.<sup>22-23 130-137</sup> Other systematic reviews evaluating social media-based interventions  
51 reported similar findings to ours, in improved testing uptake or improvements in sexual health.<sup>25-  
52 27 138-139</sup>  
53  
54

55 Our review makes a valuable addition to the growing body of evidence by highlighting the  
56 success of other interactive and engaging innovations such as avatar-guided computer programs,  
57 mobile apps, streamed soap opera videos, and combined innovations. These integrated  
58  
59  
60

1  
2  
3 innovations and programs are gaining in popularity, because of their power to engage rural and  
4 urban audiences at many levels.  
5

6  
7 Designing combined innovations that complementarity of various media, methods, platforms,  
8 and messaging may delivery best results. This complementarity may also encourage participant  
9 engagement, to improve prevention and care metrics and measures sustainably over time.  
10 Engagement is challenging when only one innovation (e.g. mHealth SMS/phone calls only) is  
11 the sole focus, where boredom is likely.  
12

### 13 **Caveats and implications for future research**

14 There are some caveats to considering design and evaluation of innovations. Future research  
15 needs to be focussed on tailoring innovations to the context and population, and program  
16 objectives. Innovations aiming to reduce risky sexual behaviors could be interactive and tailored  
17 to the setting and population, with a deep understanding of patients' needs and preferences.<sup>137 140-</sup>  
18 <sup>141</sup> Any communication with patients could be customized for timing to avoid fatigue with its  
19 uptake. For example, patients may be more responsive to weekly versus daily SMS ART  
20 reminders.<sup>32 142</sup>  
21  
22

23  
24 Study quality is essential to generating meaningful results. Large and representative samples of  
25 the underlying population and sound statistical techniques during data analysis or sampling  
26 methodology, can minimize selection bias. Exploring reasons for differential losses to follow-up  
27 could inform future studies. Wherever possible, a control group should be included to  
28 differentiate Hawthorne effect from the effect of the intervention.<sup>143</sup> Trials and impact designs  
29 can prevent or reduce confounding. Following checklists, like the one by the WHO mHealth  
30 Technical Evidence Review Group on mHealth innovations, is suggested and encouraged.<sup>144</sup>  
31  
32

33 Objective measures (e.g. HIV/STIs diagnosis, VL load) are desired in reporting of quantitative  
34 outcomes, over subjective self-reported data (e.g. condom use, self-reported adherence). This  
35 could potentially reduce some biases (misclassification biases/ or, desirability/recall biases) that  
36 are observed with subjective reporting.  
37

38  
39 Qualitative data are rich and complement the understanding of all the contextual and population  
40 needs, and capture the dynamics of sustainability and change. They need to be integrated with  
41 quantitative data to provide a holistic picture of uptake of any digital innovation.  
42

43  
44 Quality of digital data will merit from an improvement. Across studies, a lack of integrated  
45 online impact metrics in evaluating the success of innovations was evident. With continuously  
46 evolving digital media, inventing new ways to evaluate acceptability and feasibility becomes  
47 necessary. For example, some studies tracked online metrics via Google analytics.<sup>74 100-101 121-124</sup>  
48 Synergy with industry powered metrics could be a new wave to measure success of digital  
49 innovations.  
50

51  
52 To scale up proven innovations, a multi-stakeholder engagement is necessary. For that, data and  
53 metrics that appeal to all sections of stakeholders will be needed. In addition to improving the  
54 quality of randomized controlled trials and quasi-experimental impact studies, qualitative studies,  
55 cost effectiveness studies, usability studies, are also needed.  
56  
57  
58  
59  
60

### Implications for policy and practice

In consonance with other systematic reviews, evidence at-scale and over time was scarce.<sup>138</sup> This limits the projection of the long-term sustainability and cost effectiveness of digital innovations. More evidence on scale-up, cost savings and cost-effectiveness from Sub Saharan Africa and Asia is needed. Future investments that incentivize both: the development and evaluation of combined innovations by government and industry alike, and focus on sustainability of digital innovations with public and private partnerships, are urgently needed.

### CONCLUSION

---

To control HIV/STIs globally, we need novel and disruptive innovations that will uniquely impact health outcomes across the spectrum of access, engagement, treatment and retention so as to impact health service delivery. On one hand, mHealth (SMS/phone calls only) and internet-based m/eHealth were found acceptable, feasible and offered complementarity in improving prevention and care of HIV/STIs. On the other hand, when combined, they provided customized and contextualized solutions for hard-to-reach populations.

Innovations need to be proven for impact and cost effectiveness, using a combination of clinical trials, quasi-randomized studies, observational studies, qualitative research studies. Integrating these innovations across various levels of healthcare with clear evaluation, monitoring, and documentation of metrics will facilitate their integration within existing health service delivery models so as to efficiently impact health outcomes over time.

Findings from this comprehensive review will be informative to all stakeholders – innovators, researchers, healthcare practitioners, policy makers and funders – worldwide seeking evidence on integrating and funding innovations, to make the entire spectrum of HIV/STI care.

### ACKNOWLEDGEMENT

---

The authors would like to acknowledge Ms. Megan Smallwood for her assistance in editing the manuscript.

### FOOTNOTES

---

#### Contributors:

NPP, JD: concept, design.

NPP: data critiquing, write-up, critique, and overall responsibility of the data.

JD: data synthesis, write-up, critiquing.

RV, BL and SD: data synthesis, write-up and critique.

JK, TP and KD: write-up and critique.

Final version approved by all authors

**Competing Interests:**

There are no conflicts of interest

**Data Sharing:**

No additional data are available. This is a systematic review/syntheses of existing studies, therefore all data are reported in the tables.

**Funding:**

Grand Challenges Canada Transition to Scale; Grant number 0710-05.  
FRSQ Salary Award Chercheur-Boursier Junior 2.

**Figure Legends**

Figure 1. PRISMA Flow Diagram

Figure 2. All Innovations by Outcome Type

Figure 3. Sub-Group Analyses

3A. Sub-Group Analysis Pooled OR for Attendance

3B. Sub-Group Analysis Pooled OR for Adherence

**Appendices**

Appendix 1. Search Strategy

Appendix 2. Abstraction Table

Appendix 3. Table of Studies by Innovation and by Outcomes

Appendix 4. Quality Assessment of RCTs

Appendix 5. Quality Assessment of Other Trials

Appendix 6. Quality Assessment of Observational Studies

## REFERENCES

1. The World Health Organization. Sexually transmitted infections (STIs): Fact sheet N°110: WHO Media Centre; 2015 [updated December 2015. Available from: <http://www.who.int/mediacentre/factsheets/fs110/en/> accessed 27 January 2016.
2. The World Health Organization. Hepatitis B: Fact sheet N°204: WHO Media Centre; 2015 [updated July 2015. Available from: <http://www.who.int/mediacentre/factsheets/fs204/en/> accessed 27 January 2016.
3. The World Health Organization. Hepatitis C: Fact sheet N°164 2015 [updated July 2015. Available from: <http://www.who.int/mediacentre/factsheets/fs164/en/> accessed 27 January 2016.
4. The Joint United Nations Programme on HIV/AIDS. Fact Sheet 2015 2015 [Available from: <http://www.unaids.org/en/resources/campaigns/HowAIDSchangedeverything/factsheet> accessed 17 December 2016.
5. Newman L, Rowley J, Vander Hoorn S, et al. Global Estimates of the Prevalence and Incidence of Four Curable Sexually Transmitted Infections in 2012 Based on Systematic Review and Global Reporting. *PLoS One* 2015;10(12):e0143304. doi: 10.1371/journal.pone.0143304  
PONE-D-15-31044 [pii] [published Online First: 2015/12/10]
6. The Joint United Nations Programme on HIV/AIDS. The Gap Report. Geneva: UNAIDS, 2014.
7. Kagee A, Remien RH, Berkman A, et al. Structural barriers to ART adherence in Southern Africa: Challenges and potential ways forward. *Glob Public Health* 2011;6(1):83-97. doi: 922541258 [pii]  
10.1080/17441691003796387 [published Online First: 2010/05/29]
8. Pai NP. Multiplexed point-of-care assays for HIV and co-infections for resource constrained settings: a perspective. *Future Microbiol* 2015;10(9):1393-6. doi: 10.2217/fmb.15.77 [published Online First: 2015/09/09]
9. Pai NP, Vadnais C, Denkinger C, et al. Point-of-care testing for infectious diseases: diversity, complexity, and barriers in low- and middle-income countries. *PLoS Med* 2012;9(9):e1001306. doi: 10.1371/journal.pmed.1001306  
PMEDICINE-D-12-01227 [pii] [published Online First: 2012/09/14]
10. Rosen S, Fox MP. Retention in HIV care between testing and treatment in sub-Saharan Africa: a systematic review. *PLoS Med* 2011;8(7):e1001056. doi: 10.1371/journal.pmed.1001056  
PMEDICINE-D-11-00096 [pii] [published Online First: 2011/08/04]
11. Ryu S. Book Review: mHealth: New Horizons for Health through Mobile Technologies: Based on the Findings of the Second Global Survey on eHealth (Global Observatory for eHealth Series, Volume 3). *Healthcare Informatics research* 2012;18(3):231-33. doi: 10.4258/hir.2012.18.3.231
12. Free C, Phillips G, Watson L, et al. The effectiveness of mobile-health technologies to improve health care service delivery processes: a systematic review and meta-analysis. *PLoS Med* 2013;10(1):e1001363. doi: 10.1371/journal.pmed.1001363  
PMEDICINE-D-12-00641 [pii] [published Online First: 2013/03/06]
13. The World Bank. Maximizing Mobile: Information and Communication Technologies for Development. . Washington DC: International Bank for Reconstruction and Development The World Bank 2012.
14. eMarketer. Smartphone user penetration as percentage of total global population from 2011 to 2018. : Statistica- The Statistics Portal; 2014 [Available from: <http://www.statista.com/statistics/203734/global-smartphone-penetration-per-capita-since-2005/> accessed 19 February 2016.



15. eMarketer. Mobile phone internet user penetration worldwide from 2014 to 2019. : Statistica- The Statistics Potal; 2014 [Available from: <http://www.statista.com/statistics/284202/mobile-phone-internet-user-penetration-worldwide/> accessed 19 February 2016.
16. Oulasvirta A, Rattenbury T, Ma L, et al. Habits make smartphone use more pervasive. *Personal and Ubiquitous Computing* 2012;16(1):105-14.
17. Topol EJ. The creative destruction of medicine: How the digital revolution will create better health care. . New York: Basic Books 2012.
18. Akter S, Ray P. mHealth - an Ultimate Platform to Serve the Unserved. *Yearb Med Inform* 2010;94-100. doi: me10010094 [pii] [published Online First: 2010/10/13]
19. Ali EE, Chew L, Yap KYL. Evolution and current status of mhealth research: A systematic review. *BMJ Innov* 2016;2(1):33-40. doi: 10.1136/bmjinnov-2015-000096
20. Lester RT, Ritvo P, Mills EJ, et al. Effects of a mobile phone short message service on antiretroviral treatment adherence in Kenya (WelTel Kenya1): a randomised trial. *Lancet* 2010;376(9755):1838-45. doi: S0140-6736(10)61997-6 [pii] 10.1016/S0140-6736(10)61997-6 [published Online First: 2010/11/13]
21. Ambia J, Mandala J. A systematic review of interventions to improve prevention of mother-to-child HIV transmission service delivery and promote retention. *Journal of the International AIDS Society* 2016;19(1):20309. doi: 10.7448/ias.19.1.20309 [published Online First: 2016/04/09]
22. Conserve DF, Jennings L, Aguiar C, et al. Systematic review of mobile health behavioural interventions to improve uptake of HIV testing for vulnerable and key populations. *J Telemed Telecare* 2017;23(2):347-59. doi: 10.1177/1357633x16639186 [published Online First: 2016/04/09]
23. L'Engle KL, Mangone ER, Parcesepe AM, et al. Mobile Phone Interventions for Adolescent Sexual and Reproductive Health: A Systematic Review. *Pediatrics* 2016;138(3) doi: 10.1542/peds.2016-0884 [published Online First: 2016/08/25]
24. Lima IC, Galvao MT, Alexandre Hde O, et al. Information and communication technologies for adherence to antiretroviral treatment in adults with HIV/AIDS. *Int J Med Inform* 2016;92:54-61. doi: 10.1016/j.ijmedinf.2016.04.013 [published Online First: 2016/06/19]
25. Dunne A, McIntosh J, Mallory D. Adolescents, Sexually Transmitted Infections, and Education Using Social Media: A Review of the Literature. *JNP-J Nurse Pract* 2014;10(6):409-16. doi: 10.1016/j.nurpra.2014.03.020
26. Jones K, Eathington P, Baldwin K, et al. The Impact of Health Education Transmitted Via Social Media or Text Messaging on Adolescent and Young Adult Risky Sexual Behavior: A Systematic Review of the Literature. *Sex Transm Dis* 2014;41(7):413-19. doi: 10.1097/olq.0000000000000146
27. Schnall R, Travers J, Rojas M, et al. eHealth Interventions for HIV Prevention in High-Risk Men Who Have Sex With Men: A Systematic Review. *J Med Internet Res* 2014;16(5):228-37. doi: 10.2196/jmir.3393
28. Moher D, Liberati A, Tetzlaff J, et al. Preferred reporting items for systematic reviews and meta-analyses: the PRISMA statement. *Ann Intern Med* 2009;151(4):264-9, W64. doi: 0000605-200908180-00135 [pii] [published Online First: 2009/07/23]
29. Chiavegatti T, Vijh R, Pant Pai N. Metrics beyond accuracy for HIV point-of-care tests: a systematic review of evidence. *Canadian Journal of Infectious Diseases & Medical Microbiology* 2014;25(Suppl A):90A.
30. Pai M, Filion K. Classification of study designs (Version 8) Montreal: McGill University; 2014 [Available from: <http://www.teachepi.org/documents/courses/Classification%20Design.pdf>.
31. Harris R, Bradburn M, Deeks J, et al. metan: fixed- and random-effects meta-analysis. *Stata Journal* 2008;8(1):3-28.
32. Pop-Eleches C, Thirumurthy H, Habyarimana JP, et al. Mobile phone technologies improve adherence to antiretroviral treatment in a resource-limited setting: a randomized controlled trial of text



- 1  
2  
3 message reminders. *AIDS* 2011;25(6):825-34. doi: 10.1097/QAD.0b013e32834380c1 [published  
4 Online First: 2011/01/22]
- 5  
6 33. Dowshen N, Kuhns LM, Johnson A, et al. Improving adherence to antiretroviral therapy for youth  
7 living with HIV/AIDS: a pilot study using personalized, interactive, daily text message  
8 reminders. *J Med Internet Res* 2012;14(2):e51. doi: v14i2e51 [pii]  
9 10.2196/jmir.2015 [published Online First: 2012/04/07]
- 10  
11 34. Menon-Johansson AS, McNaught F, Mandalia S, et al. Texting decreases the time to treatment for  
12 genital Chlamydia trachomatis infection. *Sex Transm Infect* 2006;82(1):49-51. doi: 82/1/49 [pii]  
13 10.1136/sti.2004.014381 [published Online First: 2006/02/08]
- 14  
15 35. Finocchiaro-Kessler S, Gautney BJ, Khamadi S, et al. If you text them, they will come: using the HIV  
16 infant tracking system to improve early infant diagnosis quality and retention in Kenya. *AIDS*  
17 2014;28 Suppl 3:S313-21. doi: 10.1097/QAD.0000000000000332  
18 00002030-201407001-00011 [pii] [published Online First: 2014/07/06]
- 19  
20 36. Lim EJ, Haar J, Morgan J. Can text messaging results reduce time to treatment of Chlamydia  
21 trachomatis? *Sex Transm Infect* 2008;84(7):563-4. doi: sti.2008.032441 [pii]  
22 10.1136/sti.2008.032441 [published Online First: 2008/08/30]
- 23  
24 37. Bailey S, Scalley B, Gilles M. Text 2 treat - using SMS to recall clients for treatment. *Int J STD AIDS*  
25 2014;25(14):1038-40. doi: 0956462414530108 [pii]  
26 10.1177/0956462414530108 [published Online First: 2014/04/04]
- 27  
28 38. Smillie K, Van Borek N, Abaki J, et al. A qualitative study investigating the use of a mobile phone  
29 short message service designed to improve HIV adherence and retention in care in Canada  
30 (WelTel BC1). *J Assoc Nurses AIDS Care* 2014;25(6):614-25. doi: S1055-3290(14)00040-5 [pii]  
31 10.1016/j.jana.2014.01.008 [published Online First: 2014/04/29]
- 32  
33 39. Reback CJ, Fletcher JB, Shoptaw S, et al. Exposure to Theory-Driven Text Messages is Associated  
34 with HIV Risk Reduction Among Methamphetamine-Using Men Who have Sex with Men. *AIDS*  
35 *Behav* 2015;19 Suppl 2:130-41. doi: 10.1007/s10461-014-0985-7 [published Online First:  
36 2015/01/08]
- 37  
38 40. Evans C, Turner K, Blake H, et al. Text messaging to encourage uptake of HIV testing amongst  
39 African communities: Findings from a theory based feasibility study. *HIV Medicine*  
40 2015;16(Suppl 2):54.
- 41  
42 41. Dowshen N, Kuhns LM, Gray C, et al. Feasibility of interactive text message response (ITR) as a  
43 novel, real-time measure of adherence to antiretroviral therapy for HIV+ youth. *AIDS Behav*  
44 2013;17(6):2237-43. doi: 10.1007/s10461-013-0464-6 [published Online First: 2013/04/03]
- 45  
46 42. Cornelius JB, Dmochowski J, Boyer C, et al. Text-messaging-enhanced HIV intervention for African  
47 American adolescents: a feasibility study. *J Assoc Nurses AIDS Care* 2013;24(3):256-67. doi:  
48 S1055-3290(12)00140-9 [pii]  
49 10.1016/j.jana.2012.06.005 [published Online First: 2012/11/06]
- 50  
51 43. Ammassari A, Trotta MP, Mussini C, et al. Mobile phone intervention based on short message system  
52 (SMS) improve adherence behavior in HIV-infected non-adherent to antiretroviral therapy. The  
53 HI-Vision Study. *Infection* 2010;38(Suppl 52):52.
- 54  
55 44. Ammassari A, Trotta MP, Shalev N, et al. Timed short messaging service improves adherence and  
56 virological outcomes in HIV-1-infected patients with suboptimal adherence to antiretroviral  
57 therapy. *J Acquir Immune Defic Syndr* 2011;58(4):e113-5. doi: 10.1097/QAI.0b013e3182359d2a  
58 00126334-201112010-00015 [pii] [published Online First: 2011/10/29]
- 59  
60 45. Segaren N, Lewis T, Desinor O, et al. The distribution and use of cell phones to mothers of HIV-  
positive infants identified by the Haiti National Early Infant Diagnosis of HIV program (EID): a  
model for increasing adherence? XIX International AIDS Conference Washington DC, 2012.
46. Sheppard Z, Walsh J, Weston R. The TRxCare™ adherence support system: a pilot study of its  
acceptability to patients on virologically successful HAART. 18th Annual Conference of British  
HIV Association Birmingham, 2012.

- 1  
2  
3  
4  
5  
6  
7  
8  
9  
10  
11  
12  
13  
14  
15  
16  
17  
18  
19  
20  
21  
22  
23  
24  
25  
26  
27  
28  
29  
30  
31  
32  
33  
34  
35  
36  
37  
38  
39  
40  
41  
42  
43  
44  
45  
46  
47  
48  
49  
50  
51  
52  
53  
54  
55  
56  
57  
58  
59  
60
47. da Costa TM, Barbosa BJ, Gomes e Costa DA, et al. Results of a randomized controlled trial to assess the effects of a mobile SMS-based intervention on treatment adherence in HIV/AIDS-infected Brazilian women and impressions and satisfaction with respect to incoming messages. *Int J Med Inform* 2012;81(4):257-69. doi: S1386-5056(11)00204-8 [pii]  
10.1016/j.ijmedinf.2011.10.002 [published Online First: 2012/02/03]
48. Sabin LL, Bachman DeSilva M, Gill CJ, et al. Improving Adherence to Antiretroviral Therapy With Triggered Real-time Text Message Reminders: The China Adherence Through Technology Study. *J Acquir Immune Defic Syndr* 2015;69(5):551-9. doi: 10.1097/QAI.0000000000000651 [published Online First: 2015/04/19]
49. Brook G, Farmer T, Murphy S, et al. Using SMS text reminders to reduce 'did not attend' (DNA) rates in sexual health and HIV appointment clinics. *Sex Transm Infect* 2013;89(Suppl 1):A1-A428.
50. Kliner M, Knight A, Mamvura C, et al. Using no-cost mobile phone reminders to improve attendance for HIV test results: a pilot study in rural Swaziland. *Infect Dis Poverty* 2013;2(1):12. doi: 2049-9957-2-12 [pii]  
10.1186/2049-9957-2-12 [published Online First: 2013/07/16]
51. Farmer T, Brook G, McSorley J, et al. Using short message service text reminders to reduce 'did not attend' rates in sexual health and HIV appointment clinics. *Int J STD AIDS* 2014;25(4):289-93. doi: 0956462413502325 [pii]  
10.1177/0956462413502325 [published Online First: 2013/09/04]
52. Brook G, Burton J, McSorley J, et al. The effectiveness of SMS texts for reminding patients at high risk of STIs and HIV to return for testing. *Sex Transm Infect* 2013;89(Suppl 1):A1-A428.
53. Guy R, Wand H, Knight V, et al. SMS reminders improve re-screening in women and heterosexual men with chlamydia infection at Sydney Sexual Health Centre: a before-and-after study. *Sex Transm Infect* 2013;89(1):11-5. doi: sextrans-2011-050370 [pii]  
10.1136/sextans-2011-050370 [published Online First: 2012/04/21]
54. Burton J, Brook G, McSorley J, et al. The utility of short message service (SMS) texts to remind patients at higher risk of STIs and HIV to reattend for testing: a controlled before and after study. *Sex Transm Infect* 2014;90(1):11-3. doi: sextrans-2013-051228 [pii]  
10.1136/sextans-2013-051228 [published Online First: 2013/09/26]
55. Desai M, Burns F, Mercey D, et al. Active recall of men who have sex with men (MSM) for an HIV/STI testing: a feasible and effective strategy? *HIV Medicine* 2014;15(Suppl 3):17-159.
56. Kharbanda EO, Stockwell MS, Fox HW, et al. Text message reminders to promote human papillomavirus vaccination. *Vaccine* 2011;29(14):2537-41. doi: S0264-410X(11)00125-3 [pii]  
10.1016/j.vaccine.2011.01.065 [published Online First: 2011/02/09]
57. Vilella A, Bayas JM, Diaz MT, et al. The role of mobile phones in improving vaccination rates in travelers. *Prev Med* 2004;38(4):503-9. doi: 10.1016/j.ypmed.2003.12.005  
S0091743503003475 [pii] [published Online First: 2004/03/17]
58. Downing SG, Cashman C, McNamee H, et al. Increasing chlamydia test of re-infection rates using SMS reminders and incentives. *Sex Transm Infect* 2013;89(1):16-9. doi: sextrans-2011-050454 [pii]  
10.1136/sextans-2011-050454 [published Online First: 2012/06/26]
59. Odeny TA, Bailey RC, Bukusi EA, et al. Text messaging to improve attendance at post-operative clinic visits after adult male circumcision for HIV prevention: a randomized controlled trial. *PLoS One* 2012;7(9):e43832. doi: 10.1371/journal.pone.0043832  
PONE-D-12-11992 [pii] [published Online First: 2012/09/08]
60. de Tolly K, Skinner D, Nembaware V, et al. Investigation into the use of short message services to expand uptake of human immunodeficiency virus testing, and whether content and dosage have impact. *Telemed J E Health* 2012;18(1):18-23. doi: 10.1089/tmj.2011.0058 [published Online First: 2011/12/14]

- 1  
2  
3  
4  
5  
6  
7  
8  
9  
10  
11  
12  
13  
14  
15  
16  
17  
18  
19  
20  
21  
22  
23  
24  
25  
26  
27  
28  
29  
30  
31  
32  
33  
34  
35  
36  
37  
38  
39  
40  
41  
42  
43  
44  
45  
46  
47  
48  
49  
50  
51  
52  
53  
54  
55  
56  
57  
58  
59  
60
61. Bigna JJ, Noubiap JJ, Kouanfack C, et al. Effect of mobile phone reminders on follow-up medical care of children exposed to or infected with HIV in Cameroon (MORE CARE): a multicentre, single-blind, factorial, randomised controlled trial. *Lancet Infect Dis* 2014;14(7):600-8. doi: S1473-3099(14)70741-8 [pii]  
10.1016/S1473-3099(14)70741-8 [published Online First: 2014/06/17]
62. Rand CM, Brill H, Albertin C, et al. Effectiveness of centralized text message reminders on human papillomavirus immunization coverage for publicly insured adolescents. *J Adolesc Health* 2015;56(5 Suppl):S17-20. doi: S1054-139X(14)00707-1 [pii]  
10.1016/j.jadohealth.2014.10.273 [published Online First: 2015/04/13]
63. Matheson EC, Derouin A, Gagliano M, et al. Increasing HPV vaccination series completion rates via text message reminders. *J Pediatr Health Care* 2014;28(4):e35-9. doi: S0891-5245(13)00293-9 [pii]  
10.1016/j.pedhc.2013.09.001 [published Online First: 2013/11/10]
64. Schwartz SR, Clouse K, Yende N, et al. Acceptability and Feasibility of a Mobile Phone-Based Case Management Intervention to Retain Mothers and Infants from an Option B+ Program in Postpartum HIV Care. *Matern Child Health J* 2015;19(9):2029-37. doi: 10.1007/s10995-015-1715-0 [published Online First: 2015/02/07]
65. Belzer ME, Naar-King S, Olson J, et al. The use of cell phone support for non-adherent HIV-infected youth and young adults: an initial randomized and controlled intervention trial. *AIDS Behav* 2014;18(4):686-96. doi: 10.1007/s10461-013-0661-3 [published Online First: 2013/11/26]
66. Maduka O, Tobin-West CI. Adherence counseling and reminder text messages improve uptake of antiretroviral therapy in a tertiary hospital in Nigeria. *Niger J Clin Pract* 2013;16(3):302-8. doi: NigerJClinPract\_2013\_16\_3\_302\_113451 [pii]  
10.4103/1119-3077.113451 [published Online First: 2013/06/19]
67. Kebaya L, Nduati R, Bashir A. Efficacy of mobile phone use on adherence to nevirapine prophylaxis and retention in care among the HIV-exposed infants in PMTCT: a randomized controlled trial. *Arch Dis Child* 2014;99(Suppl 2):A1-A620.
68. Hardy H, Kumar V, Doros G, et al. Randomized controlled trial of a personalized cellular phone reminder system to enhance adherence to antiretroviral therapy. *AIDS Patient Care STDS* 2011;25(3):153-61. doi: 10.1089/apc.2010.0006 [published Online First: 2011/02/18]
69. DiClemente RJ, Wingood GM, Sales JM, et al. Efficacy of a telephone-delivered sexually transmitted infection/human immunodeficiency virus prevention maintenance intervention for adolescents: a randomized clinical trial. *JAMA Pediatr* 2014;168(10):938-46. doi: 1899236 [pii]  
10.1001/jamapediatrics.2014.1436 [published Online First: 2014/08/27]
70. Cornelius JB, Cato M, Lawrence JS, et al. Development and pretesting multimedia HIV-prevention text messages for mobile cell phone delivery. *J Assoc Nurses AIDS Care* 2011;22(5):407-13. doi: S1055-3290(10)00224-4 [pii]  
10.1016/j.jana.2010.11.007 [published Online First: 2011/01/25]
71. Dean AL, Makin JD, Kydd AS, et al. A pilot study using interactive SMS support groups to prevent mother-to-child HIV transmission in South Africa. *J Telemed Telecare* 2012;18(7):399-403. doi: jtt.2012.120118 [pii]  
10.1258/jtt.2012.120118 [published Online First: 2012/10/05]
72. Juzang I, Fortune T, Black S, et al. A pilot programme using mobile phones for HIV prevention. *J Telemed Telecare* 2011;17(3):150-3. doi: jtt.2010.091107 [pii]  
10.1258/jtt.2010.091107 [published Online First: 2011/01/29]
73. Kalichman SC, Kalichman MO, Cherry C, et al. Brief behavioral self-regulation counseling for HIV treatment adherence delivered by cell phone: an initial test of concept trial. *AIDS Patient Care STDS* 2011;25(5):303-10. doi: 10.1089/apc.2010.0367 [published Online First: 2011/04/05]

- 1  
2  
3  
4  
5  
6  
7  
8  
9  
10  
11  
12  
13  
14  
15  
16  
17  
18  
19  
20  
21  
22  
23  
24  
25  
26  
27  
28  
29  
30  
31  
32  
33  
34  
35  
36  
37  
38  
39  
40  
41  
42  
43  
44  
45  
46  
47  
48  
49  
50  
51  
52  
53  
54  
55  
56  
57  
58  
59  
60
74. Mbuagbaw L, Thabane L, Ongolo-Zogo P, et al. The Cameroon Mobile Phone SMS (CAMPS) trial: a randomized trial of text messaging versus usual care for adherence to antiretroviral therapy. *PLoS One* 2012;7(12):e46909. doi: 10.1371/journal.pone.0046909  
PONE-D-12-24092 [pii] [published Online First: 2012/12/14]
75. Moore DJ, Poquette A, Casaletto KB, et al. Individualized texting for adherence building (iTAB): improving antiretroviral dose timing among HIV-infected persons with co-occurring bipolar disorder. *AIDS Behav* 2015;19(3):459-71. doi: 10.1007/s10461-014-0971-0 [published Online First: 2014/12/17]
76. Norton BL, Person AK, Castillo C, et al. Barriers to using text message appointment reminders in an HIV clinic. *Telemed J E Health* 2014;20(1):86-9. doi: 10.1089/tmj.2012.0275 [published Online First: 2013/10/29]
77. Odeny TA, Bailey RC, Bukusi EA, et al. Effect of text messaging to deter early resumption of sexual activity after male circumcision for HIV prevention: a randomized controlled trial. *J Acquir Immune Defic Syndr* 2014;65(2):e50-7. doi: 10.1097/QAI.0b013e3182a0a050 [published Online First: 2013/07/13]
78. Bauermeister J, Carballo-Diequez A, Giguere R, et al. Interactive voice response system (IVRS): data quality considerations and lessons learned during a microbicide placebo adherence trial with young men who have sex with men. *Journal of Adolescent Health* 2014;54(2):S57-S58.
79. Belzer ME, Kolmodin MacDonell K, Clark LF, et al. Acceptability and Feasibility of a Cell Phone Support Intervention for Youth Living with HIV with Nonadherence to Antiretroviral Therapy. *AIDS Patient Care STDS* 2015;29(6):338-45. doi: 10.1089/apc.2014.0282 [published Online First: 2015/05/01]
80. Shet A, De Costa A, Kumarasamy N, et al. Effect of mobile telephone reminders on treatment outcome in HIV: evidence from a randomised controlled trial in India. *BMJ* 2014;349:g5978. [published Online First: 2014/01/01]
81. Reid MJ, Dhar SI, Cary M, et al. Opinions and attitudes of participants in a randomized controlled trial examining the efficacy of SMS reminders to enhance antiretroviral adherence: a cross-sectional survey. *J Acquir Immune Defic Syndr* 2014;65(2):e86-8. doi: 10.1097/QAI.0b013e3182a9c72b  
00126334-201402010-00027 [pii] [published Online First: 2014/01/21]
82. Roth AM, Hensel DJ, Fortenberry JD, et al. Feasibility and acceptability of cell phone diaries to measure HIV risk behavior among female sex workers. *AIDS Behav* 2014;18(12):2314-24. doi: 10.1007/s10461-014-0718-y [published Online First: 2014/03/20]
83. Barnabas RV, van Rooyen H, Tumwesigye E, et al. Uptake of antiretroviral therapy and male circumcision after community-based HIV testing and strategies for linkage to care versus standard clinic referral: a multisite, open-label, randomised controlled trial in South Africa and Uganda. *The lancet HIV* 2016;3(5):e212-20. doi: 10.1016/s2352-3018(16)00020-5 [published Online First: 2016/04/30]
84. Bassett IV, Coleman SM, Giddy J, et al. Sizanani: A Randomized Trial of Health System Navigators to Improve Linkage to HIV and TB Care in South Africa. *J Acquir Immune Defic Syndr* 2016;73(2):154-60. doi: 10.1097/qai.0000000000001025 [published Online First: 2016/09/16]
85. Cantudo-Cuenca MR, Manzano-Garcia M, Jimenez-Galan R, et al. Effect of mobile phone short messages on antiretroviral treatment adherence among HIV infected patients. *International Journal of Clinical Pharmacy* 2016;38 (6):517. doi: <http://dx.doi.org/10.1007/s11096-015-0240-y>
86. Haberer JE, Musiimenta A, Atukunda EC, et al. Short message service (SMS) reminders and real-time adherence monitoring improve antiretroviral therapy adherence in rural Uganda. *AIDS* 2016;30(8):1295-300. doi: 10.1097/qad.0000000000001021 [published Online First: 2016/01/14]
87. Jeffries C, Ross P, Matoff-Stepp S, et al. Ucare4life: Mobile texting to improve HIV care continuum outcomes for minority youth. *Topics in Antiviral Medicine* 2016;24 (E-1):427.



- 1  
2  
3  
4  
5  
6  
7  
8  
9  
10  
11  
12  
13  
14  
15  
16  
17  
18  
19  
20  
21  
22  
23  
24  
25  
26  
27  
28  
29  
30  
31  
32  
33  
34  
35  
36  
37  
38  
39  
40  
41  
42  
43  
44  
45  
46  
47  
48  
49  
50  
51  
52  
53  
54  
55  
56  
57  
58  
59  
60
88. Joseph Davey D, Nhavoto JA, Augusto O, et al. SMSaude: Evaluating Mobile Phone Text Reminders to Improve Retention in HIV Care for Patients on Antiretroviral Therapy in Mozambique. *J Acquir Immune Defic Syndr* 2016;73(2):e23-30. doi: 10.1097/qai.0000000000001115 [published Online First: 2016/09/16]
  89. Kampman C, Koedijk F, Driessen-Hulshof H, et al. Retesting young STI clinic visitors with urogenital Chlamydia trachomatis infection in the Netherlands; response to a text message reminder and reinfection rates: a prospective study with historical controls. *Sex Transm Infect* 2016;92(2):124-9. doi: 10.1136/sextrans-2015-052115 [published Online First: 2015/09/26]
  90. Kassaye SG, Ong'ech J, Sirengo M, et al. Cluster-Randomized Controlled Study of SMS Text Messages for Prevention of Mother-to-Child Transmission of HIV in Rural Kenya. *AIDS research and treatment* 2016;2016:1289328. doi: 10.1155/2016/1289328 [published Online First: 2017/01/06]
  91. McIver R, Dyda A, McNulty AM, et al. Text message reminders do not improve hepatitis B vaccination rates in an Australian sexual health setting. *Journal of the American Medical Informatics Association : JAMIA* 2016;23(e1):e88-92. doi: 10.1093/jamia/ocv145 [published Online First: 2015/10/27]
  92. Njuguna N, Ngure K, Mugo N, et al. The Effect of Human Immunodeficiency Virus Prevention and Reproductive Health Text Messages on Human Immunodeficiency Virus Testing Among Young Women in Rural Kenya: A Pilot Study. *Sex Transm Dis* 2016;43(6):353-9. doi: 10.1097/olq.0000000000000450 [published Online First: 2016/05/21]
  93. Nsagha DS, Lange I, Fon PN, et al. A Randomized Controlled Trial on the Usefulness of Mobile Text Phone Messages to Improve the Quality of Care of HIV and AIDS Patients in Cameroon. *Open AIDS J* 2016;10:93-103. doi: 10.2174/1874613601610010093 [published Online First: 2016/09/02]
  94. Nyatsanza F, McSorley J, Murphy S, et al. 'It's all in the message': the utility of personalised short message service (SMS) texts to remind patients at higher risk of STIs and HIV to reattend for testing-a repeat before and after study. *Sex Transm Infect* 2016;92(5):393-5. doi: 10.1136/sextrans-2015-052216 [published Online First: 2015/12/17]
  95. Rana AI, van den Berg JJ, Lamy E, et al. Using a Mobile Health Intervention to Support HIV Treatment Adherence and Retention Among Patients at Risk for Disengaging with Care. *AIDS Patient Care STDS* 2016;30(4):178-84. doi: 10.1089/apc.2016.0025 [published Online First: 2016/03/31]
  96. Rand CM, Vincelli P, Goldstein NP, et al. Effects of Phone and Text Message Reminders on Completion of the Human Papillomavirus Vaccine Series. *J Adolesc Health* 2017;60(1):113-19. doi: 10.1016/j.jadohealth.2016.09.011 [published Online First: 2016/11/12]
  97. Coleman J, Bohlin KC, Thorson A, et al. Effectiveness of an SMS-based maternal mHealth intervention to improve clinical outcomes of HIV-positive pregnant women. *AIDS care* 2017:1-8. doi: 10.1080/09540121.2017.1280126 [published Online First: 2017/01/22]
  98. Garofalo R, Kuhns LM, Hotton A, et al. A Randomized Controlled Trial of Personalized Text Message Reminders to Promote Medication Adherence Among HIV-Positive Adolescents and Young Adults. *AIDS Behav* 2016;20(5):1049-59. doi: 10.1007/s10461-015-1192-x [published Online First: 2015/09/13]
  99. Georgette N, Siedner MJ, Zanoni B, et al. The Acceptability and Perceived Usefulness of a Weekly Clinical SMS Program to Promote HIV Antiretroviral Medication Adherence in KwaZulu-Natal, South Africa. *AIDS Behav* 2016;20(11):2629-38. doi: 10.1007/s10461-016-1287-z [published Online First: 2016/10/21]
  100. Dowshen N, Lee S, Matty Lehman B, et al. IknowUshould2: Feasibility of a Youth-Driven Social Media Campaign to Promote STI and HIV Testing Among Adolescents in Philadelphia. *AIDS Behav* 2015;19 Suppl 2:106-11. doi: 10.1007/s10461-014-0991-9 [published Online First: 2015/01/08]

- 1  
2  
3  
4  
5  
6  
7  
8  
9  
10  
11  
12  
13  
14  
15  
16  
17  
18  
19  
20  
21  
22  
23  
24  
25  
26  
27  
28  
29  
30  
31  
32  
33  
34  
35  
36  
37  
38  
39  
40  
41  
42  
43  
44  
45  
46  
47  
48  
49  
50  
51  
52  
53  
54  
55  
56  
57  
58  
59  
60
101. Jones M, Aderogba K, Drunis L. Providing rapid HIV testing in their homes for men who have sex with men, recruited via social media. *HIV Medicine* 2015;16(Suppl 2):50-51.
  102. Kurth AE, Spielberg F, Cleland CM, et al. Computerized counseling reduces HIV-1 viral load and sexual transmission risk: findings from a randomized controlled trial. *J Acquir Immune Defic Syndr* 2014;65(5):611-20. doi: 10.1097/QAI.000000000000100 [published Online First: 2014/01/05]
  103. Lelutiu-Weinberger C, Pachankis JE, Gamarel KE, et al. Feasibility, Acceptability, and Preliminary Efficacy of a Live-Chat Social Media Intervention to Reduce HIV Risk Among Young Men Who Have Sex With Men. *AIDS Behav* 2015;19(7):1214-27. doi: 10.1007/s10461-014-0911-z [published Online First: 2014/09/27]
  104. Perera AI, Thomas MG, Moore JO, et al. Effect of a smartphone application incorporating personalized health-related imagery on adherence to antiretroviral therapy: a randomized clinical trial. *AIDS Patient Care STDS* 2014;28(11):579-86. doi: 10.1089/apc.2014.0156 [published Online First: 2014/10/08]
  105. Jones K, Baldwin KA, Lewis PR. The potential influence of a social media intervention on risky sexual behavior and Chlamydia incidence. *J Community Health Nurs* 2012;29(2):106-20. doi: 10.1080/07370016.2012.670579 [published Online First: 2012/04/28]
  106. Jones R, Hoover DR, Lacroix LJ. A randomized controlled trial of soap opera videos streamed to smartphones to reduce risk of sexually transmitted human immunodeficiency virus (HIV) in young urban African American women. *Nurs Outlook* 2013;61(4):205-15 e3. doi: S0029-6554(13)00061-4 [pii] 10.1016/j.outlook.2013.03.006 [published Online First: 2013/06/08]
  107. Naar-King S, Outlaw AY, Sarr M, et al. Motivational Enhancement System for Adherence (MESA): pilot randomized trial of a brief computer-delivered prevention intervention for youth initiating antiretroviral treatment. *J Pediatr Psychol* 2013;38(6):638-48. doi: jss132 [pii] 10.1093/jpepsy/jss132 [published Online First: 2013/01/30]
  108. Elliot E, Rossi M, McCormack S, et al. Identifying undiagnosed HIV in men who have sex with men (MSM) by offering HIV home sampling via online gay social media: a service evaluation. *Sex Transm Infect* 2016;92(6):470-3. doi: 10.1136/sextrans-2015-052090 [published Online First: 2016/05/26]
  109. Garrett R, Menacho L, Young SD. Ethical Issues in Using Social Media to Deliver an HIV Prevention Intervention: Results from the HOPE Peru Study. *Prevention science : the official journal of the Society for Prevention Research* 2017;18(2):225-32. doi: 10.1007/s11121-016-0739-z [published Online First: 2016/12/10]
  110. Himelhoch S, Kreyenbuhl J, Palmer-Bacon J, et al. Pilot feasibility study of Heart2HAART: a smartphone application to assist with adherence among substance users living with HIV. *AIDS care* 2017:1-7. doi: 10.1080/09540121.2016.1259454 [published Online First: 2017/01/04]
  111. Huang E, Marlin RW, Young SD, et al. Using Grindr, a Smartphone Social-Networking Application, to Increase HIV Self-Testing Among Black and Latino Men Who Have Sex With Men in Los Angeles, 2014. *AIDS education and prevention : official publication of the International Society for AIDS Education* 2016;28(4):341-50. doi: 10.1521/aeap.2016.28.4.341 [published Online First: 2016/07/20]
  112. Jeon JH. Evaluation of a smartphone application for self-care performance of patients with chronic hepatitis B: A randomized controlled trial. *Applied nursing research : ANR* 2016;32:182-89. doi: 10.1016/j.apnr.2016.07.011 [published Online First: 2016/12/15]
  113. Polilli E, Sozio F, Di Stefano P, et al. Web-Based HIV Testing in Abruzzo, Italy: Analysis of 15-Month Activity Results. *AIDS Patient Care STDS* 2016;30(10):471-75. doi: 10.1089/apc.2016.0082
  114. Przybyła SM, Eliseo-Arras RK, Krawiec G, et al. Feasibility and Acceptability of a Smartphone App for Daily Reports of Substance Use and Antiretroviral Therapy Adherence among HIV-Infected



- Adults. *AIDS research and treatment* 2016;2016:9510172. doi: 10.1155/2016/9510172 [published Online First: 2016/09/10]
115. Rhodes SD, McCoy TP, Tanner AE, et al. Using Social Media to Increase HIV Testing Among Gay and Bisexual Men, Other Men Who Have Sex With Men, and Transgender Persons: Outcomes From a Randomized Community Trial. *Clinical infectious diseases : an official publication of the Infectious Diseases Society of America* 2016;62(11):1450-3. doi: 10.1093/cid/ciw127 [published Online First: 2016/03/17]
116. Rosengren AL, Huang E, Daniels J, et al. Feasibility of using Grindr™ to distribute HIV self-test kits to men who have sex with men in Los Angeles, California. *Sexual health* 2016 doi: 10.1071/sh15236 [published Online First: 2016/05/23]
117. Solorio R, Norton-Shelpuk P, Forehand M, et al. Tu Amigo Pepe: Evaluation of a Multi-media Marketing Campaign that Targets Young Latino Immigrant MSM with HIV Testing Messages. *AIDS Behav* 2016;20(9):1973-88. doi: 10.1007/s10461-015-1277-6 [published Online First: 2016/02/07]
118. Talal AH, Andrews P, McLeod A, et al. Telemedicine-based Hepatitis C Virus (HCV) management for individuals on opioid agonist treatment (OAT). *Hepatology* 2016;63 (1 Supplement 1):475A.
119. Henwood R, Patten G, Barnett W, et al. Acceptability and use of a virtual support group for HIV-positive youth in Khayelitsha, Cape Town using the MXit social networking platform. *AIDS care* 2016;28(7):898-903. doi: 10.1080/09540121.2016.1173638 [published Online First: 2016/04/22]
120. Brayboy LM, Sepolen A, Mezoian T, et al. Girl Talk: A Smartphone Application to Teach Sexual Health Education to Adolescent Girls. *J Pediatr Adolesc Gynecol* 2017;30(1):23-28. doi: 10.1016/j.jpag.2016.06.011 [published Online First: 2016/07/10]
121. Horvath KJ, Oakes JM, Rosser BR, et al. Feasibility, acceptability and preliminary efficacy of an online peer-to-peer social support ART adherence intervention. *AIDS Behav* 2013;17(6):2031-44. doi: 10.1007/s10461-013-0469-1 [published Online First: 2013/04/05]
122. Gotz HM, van Rooijen MS, Vriens P, et al. Initial evaluation of use of an online partner notification tool for STI, called 'suggest a test': a cross sectional pilot study. *Sex Transm Infect* 2014;90(3):195-200. doi: sextrans-2013-051254 [pii] 10.1136/sextrans-2013-051254 [published Online First: 2014/01/07]
123. Friedman AL, Brookmeyer KA, Kachur RE, et al. An assessment of the GYT: Get Yourself Tested campaign: an integrated approach to sexually transmitted disease prevention communication. *Sex Transm Dis* 2014;41(3):151-7. doi: 10.1097/OLQ.0000000000001000007435-201403000-00001 [pii] [published Online First: 2014/02/14]
124. Hightow-Weidman LB, Muessig KE, Pike EC, et al. HealthMpowerment.org: Building Community Through a Mobile-Optimized, Online Health Promotion Intervention. *Health Educ Behav* 2015;42(4):493-9. doi: 1090198114562043 [pii] 10.1177/1090198114562043 [published Online First: 2015/01/16]
125. Dokkum NF, Koekenbier RH, van den Broek IV, et al. Keeping participants on board: increasing uptake by automated respondent reminders in an Internet-based chlamydia screening in the Netherlands. *BMC Public Health* 2012;12:176. doi: 1471-2458-12-176 [pii] 10.1186/1471-2458-12-176 [published Online First: 2012/03/13]
126. Hightow-Weidman L, Beagle S, Pike E, et al. "No one's at home and they won't pick up the phone": using the Internet and text messaging to enhance partner services in North Carolina. *Sex Transm Dis* 2014;41(2):143-8. doi: 10.1097/OLQ.0000000000000087 00007435-201402000-00014 [pii] [published Online First: 2014/01/15]
127. Aronson ID, Cleland CM, Perlman DC, et al. MOBILE SCREENING TO IDENTIFY AND FOLLOW-UP WITH HIGH RISK, HIV NEGATIVE YOUTH. *Journal of mobile technology in medicine* 2016;5(1):9-18. doi: 10.7309/jmtm.5.1.3 [published Online First: 2016/04/26]
128. Hirsch-Moverman Y, Daftary A, Yuengling KA, et al. Using mHealth for HIV/TB Treatment Support in Lesotho: Enhancing Patient-Provider Communication in the START Study. *J Acquir*

- 1  
2  
3  
4  
5  
6  
7  
8  
9  
10  
11  
12  
13  
14  
15  
16  
17  
18  
19  
20  
21  
22  
23  
24  
25  
26  
27  
28  
29  
30  
31  
32  
33  
34  
35  
36  
37  
38  
39  
40  
41  
42  
43  
44  
45  
46  
47  
48  
49  
50  
51  
52  
53  
54  
55  
56  
57  
58  
59  
60
- Immune Defic Syndr* 2017;74 Suppl 1:S37-S43. doi: 10.1097/qai.0000000000001202 [published Online First: 2016/12/09]
129. John ME, Samson-Akpan PE, Etowa JB, et al. Enhancing self-care, adjustment and engagement through mobile phones in youth with HIV. *International nursing review* 2016;63(4):555-61. doi: 10.1111/inr.12313 [published Online First: 2016/09/23]
130. Guy R, Hocking J, Wand H, et al. How effective are short message service reminders at increasing clinic attendance? A meta-analysis and systematic review. *Health Serv Res* 2012;47(2):614-32. doi: 10.1111/j.1475-6773.2011.01342.x [published Online First: 2011/11/19]
131. Free C, Phillips G, Galli L, et al. The effectiveness of mobile-health technology-based health behaviour change or disease management interventions for health care consumers: a systematic review. *PLoS Med* 2013;10(1):e1001362. doi: 10.1371/journal.pmed.1001362  
PMEDICINE-D-12-00520 [pii] [published Online First: 2013/01/26]
132. Ershad Sarabi R, Sadoughi F, Jamshidi Orak R, et al. The Effectiveness of Mobile Phone Text Messaging in Improving Medication Adherence for Patients with Chronic Diseases: A Systematic Review. *Iranian Red Crescent medical journal* 2016;18(5):e25183. doi: 10.5812/ircmj.25183 [published Online First: 2016/07/21]
133. Finitis DJ, Pellowski JA, Huedo-Medina TB, et al. Visual analogue scale (VAS) measurement of antiretroviral adherence in people living with HIV (PLWH): a meta-analysis. *Journal of behavioral medicine* 2016;39(6):1043-55. doi: 10.1007/s10865-016-9770-6 [published Online First: 2016/08/03]
134. Kanters S, Park JJ, Chan K, et al. Interventions to improve adherence to antiretroviral therapy: a systematic review and network meta-analysis. *The lancet HIV* 2017;4(1):e31-e40. doi: 10.1016/s2352-3018(16)30206-5 [published Online First: 2016/11/20]
135. Mayer JE, Fontelo P. Meta-analysis on the effect of text message reminders for HIV-related compliance. *AIDS care* 2016:1-9. doi: 10.1080/09540121.2016.1214674 [published Online First: 2016/08/02]
136. Thakkar J, Kurup R, Laba TL, et al. Mobile telephone text messaging for medication adherence in chronic disease a meta-analysis. *JAMA Intern Med* 2016;176(3):340-49. doi: 10.1001/jamainternmed.2015.7667
137. Mbuagbaw L, Mursleen S, Lytvyn L, et al. Mobile phone text messaging interventions for HIV and other chronic diseases: an overview of systematic reviews and framework for evidence transfer. *BMC Health Serv Res* 2015;15:33. doi: 10.1186/s12913-014-0654-6  
s12913-014-0654-6 [pii] [published Online First: 2015/01/23]
138. Muessig KE, Nekkanti M, Bauermeister J, et al. A Systematic Review of Recent Smartphone, Internet and Web 2.0 Interventions to Address the HIV Continuum of Care. *Curr Hiv/Aids Rep* 2015;12(1):173-90. doi: 10.1007/s11904-014-0239-3
139. Gabarron E, Wynn R. Use of social media for sexual health promotion: a scoping review. *Global health action* 2016;9:32193. doi: 10.3402/gha.v9.32193 [published Online First: 2016/09/22]
140. Chavez NR, Shearer LS, Rosenthal SL. Use of digital media technology for primary prevention of STIs/HIV in youth. *J Pediatr Adolesc Gynecol* 2014;27(5):244-57. doi: 10.1016/j.jpag.2013.07.008 [published Online First: 2013/12/18]
141. Barello S, Triberti S, Graffigna G, et al. eHealth for Patient Engagement: A Systematic Review. *Front Psychol* 2015;6:2013. doi: 10.3389/fpsyg.2015.02013 [published Online First: 2016/01/19]
142. Finitis DJ, Pellowski JA, Johnson BT. Text Message Intervention Designs to Promote Adherence to Antiretroviral Therapy (ART): A Meta-Analysis of Randomized Controlled Trials. *PLoS ONE* 2014;9(2) doi: e88166  
10.1371/journal.pone.0088166
143. Fletcher WR, Fletcher WS. Chapter 8: Treatment. *Clinical Epidemiology: The Essentials*. 4th ed. Baltimore: Lippincott Williams & Wilkins 2005:141.

- 1  
2  
3  
4  
5  
6  
7  
8  
9  
10  
11  
12  
13  
14  
15  
16  
17  
18  
19  
20  
21  
22  
23  
24  
25  
26  
27  
28  
29  
30  
31  
32  
33  
34  
35  
36  
37  
38  
39  
40  
41  
42  
43  
44  
45  
46  
47  
48  
49  
50  
51  
52  
53  
54  
55  
56  
57  
58  
59  
60
144. Agarwal S, LeFevre AE, Lee J, et al. Guidelines for reporting of health interventions using mobile phones: mobile health (mHealth) evidence reporting and assessment (mERA) checklist. *BMJ* 2016;352:i1174. [published Online First: 2016/03/19]

For peer review only

1  
2  
3  
4  
5  
6  
7  
8  
9  
10  
11  
12  
13  
14  
15  
16  
17  
18  
19  
20  
21  
22  
23  
24  
25  
26  
27  
28  
29  
30  
31  
32  
33  
34  
35  
36  
37  
38  
39  
40  
41  
42  
43  
44  
45  
46  
47  
48  
49  
50  
51  
52  
53  
54  
55  
56  
57  
58  
59  
60

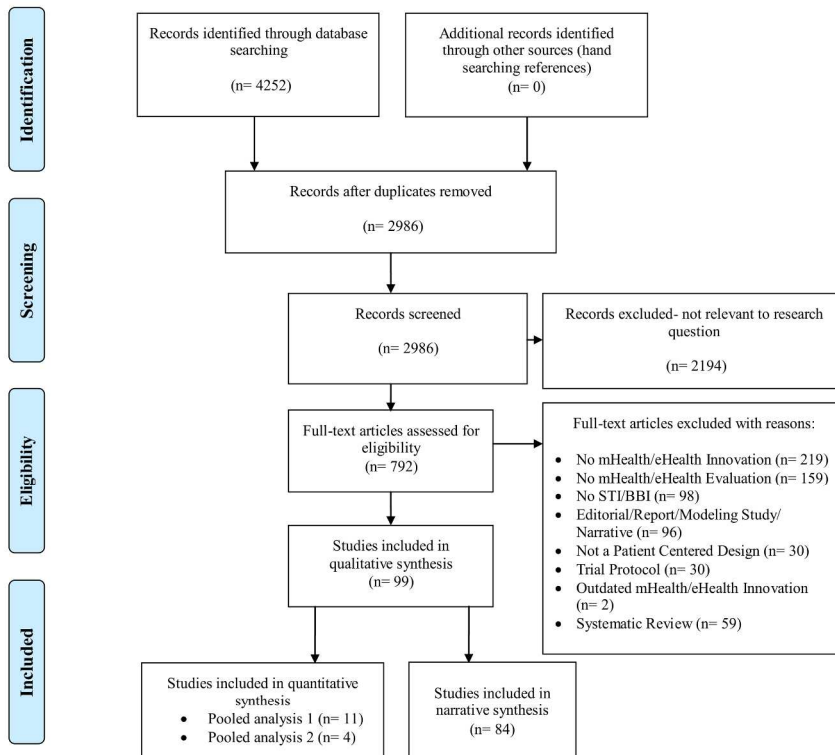

Figure 1: PRISMA flow diagram

215x279mm (300 x 300 DPI)

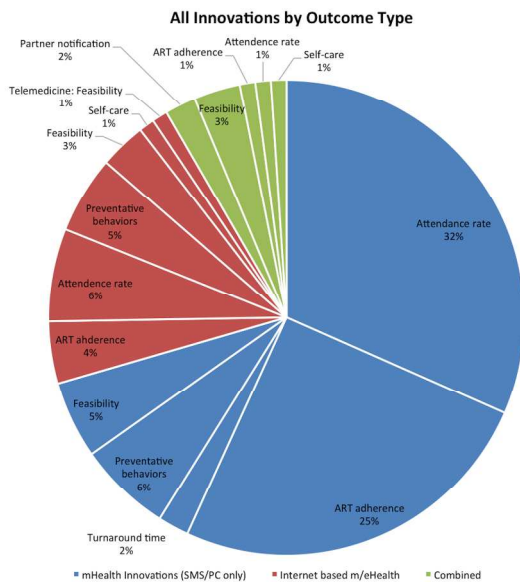

Figure 2. All Innovations by Outcome Type

279x162mm (300 x 300 DPI)

Review only

1  
2  
3  
4  
5  
6  
7  
8  
9  
10  
11  
12  
13  
14  
15  
16  
17  
18  
19  
20  
21  
22  
23  
24  
25  
26  
27  
28  
29  
30  
31  
32  
33  
34  
35  
36  
37  
38  
39  
40  
41  
42  
43  
44  
45  
46  
47  
48  
49  
50  
51  
52  
53  
54  
55  
56  
57  
58  
59  
60

1  
2  
3  
4  
5  
6  
7  
8  
9  
10  
11  
12  
13  
14  
15  
16  
17  
18  
19  
20  
21  
22  
23  
24  
25  
26  
27  
28  
29  
30  
31  
32  
33  
34  
35  
36  
37  
38  
39  
40  
41  
42  
43  
44  
45  
46  
47  
48  
49  
50  
51  
52  
53  
54  
55  
56  
57  
58  
59  
60

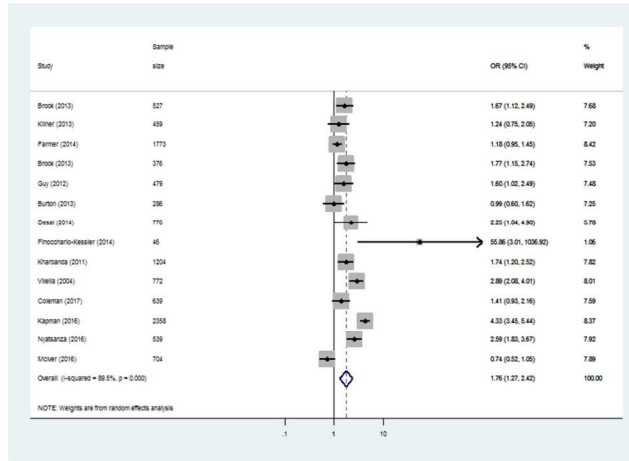

Figure 3A. Sub-Group Analysis Pooled OR for Attendance

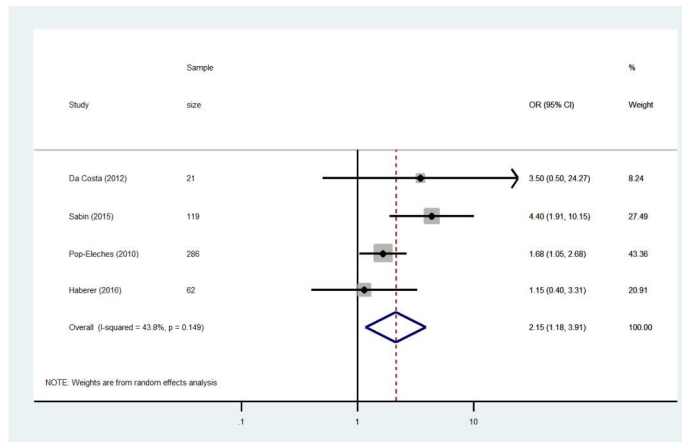

Figure 3B. Sub-Group Analysis Pooled OR for Adherence

Figure 3. Sub-Group Analyses

215x279mm (300 x 300 DPI)



## Appendix 1: Search Strategy.

|                                                                                                                                                                                                                                                                                                                                                                                                                                                                                                                            |                                                                                                                                                                                                                                                                                                                                                                                                                                                                                                                                                                                                                                                                                                                                                                                                                                                                                                                                                                                                                                                                                                                                                                                                                                                                                                                                                                                                                                                                                                                                                                                                                                                                                                                                                                                                                                                                                                                                                              |
|----------------------------------------------------------------------------------------------------------------------------------------------------------------------------------------------------------------------------------------------------------------------------------------------------------------------------------------------------------------------------------------------------------------------------------------------------------------------------------------------------------------------------|--------------------------------------------------------------------------------------------------------------------------------------------------------------------------------------------------------------------------------------------------------------------------------------------------------------------------------------------------------------------------------------------------------------------------------------------------------------------------------------------------------------------------------------------------------------------------------------------------------------------------------------------------------------------------------------------------------------------------------------------------------------------------------------------------------------------------------------------------------------------------------------------------------------------------------------------------------------------------------------------------------------------------------------------------------------------------------------------------------------------------------------------------------------------------------------------------------------------------------------------------------------------------------------------------------------------------------------------------------------------------------------------------------------------------------------------------------------------------------------------------------------------------------------------------------------------------------------------------------------------------------------------------------------------------------------------------------------------------------------------------------------------------------------------------------------------------------------------------------------------------------------------------------------------------------------------------------------|
| Search #1                                                                                                                                                                                                                                                                                                                                                                                                                                                                                                                  | "HIV Infections"[Mesh] OR "HIV" [MeSH] OR "human immunodeficiency virus"[tiab] OR "human immuno deficiency virus"[tiab] OR "human immune deficiency virus"[tiab] OR "human immunodeficiency virus"[tiab] OR "aids"[tiab] OR "acquired immunodeficiency syndrome"[tiab] OR "acquired immunodeficiency syndromes"[tiab] OR "acquired immuno deficiency syndrome"[tiab] OR "acquired immune deficiency syndromes"[tiab] OR "acquired immune deficiency syndromes"[tiab] OR "acquired immunodeficiency syndrome"[tiab] OR "acquired immunodeficiency syndromes"[tiab]                                                                                                                                                                                                                                                                                                                                                                                                                                                                                                                                                                                                                                                                                                                                                                                                                                                                                                                                                                                                                                                                                                                                                                                                                                                                                                                                                                                            |
| Search #2                                                                                                                                                                                                                                                                                                                                                                                                                                                                                                                  | "mHealth" [tiab] OR "telemedicine"[MeSH] OR telemedicine[tiab] OR eHealth[MeSH] OR ehealth[tiab] OR "mobile health" [tiab] OR "mobile technology"[tiab] OR "app"[tiab] OR "apps"[tiab] OR "mobile applications" OR social medi*[tiab] OR cell phone* [tiab] OR cellphone*[tiab] OR "cellular phone"[mesh] OR cellular phone*[tiab] OR smartphone*[tiab] OR smart phone*[tiab] OR mobile phone[tiab] OR mobile device*[tiab] OR cellular telephone*[tiab] OR mobile telephone*[tiab] OR text messag*[tiab] OR texting[tiab] OR texted[tiab] OR SMS[tiab] OR MMS[tiab] OR multimedia messag*[tiab] OR short messag*[tiab] OR "computers, handheld"[mesh] OR personal digital assistant*[tiab]                                                                                                                                                                                                                                                                                                                                                                                                                                                                                                                                                                                                                                                                                                                                                                                                                                                                                                                                                                                                                                                                                                                                                                                                                                                                  |
| Search #3 [1,2]<br>References<br>1.Ferreira A, Young T, Mathews C, Zunza M, Low N. Strategies for partner notification for sexually transmitted infections, including HIV. Cochrane Database of Systematic Reviews 2013, Issue 10. Art. No.: CD002843. DOI: 10.1002/14651858.CD002843.pub2<br>2.Obiero J, Mwethera PG, Wiysonge CS. Topical microbicides for prevention of sexually transmitted infections. Cochrane Database of Systematic Reviews 2012, Issue 6. Art. No.: CD007961. DOI: 10.1002/14651858.CD007961.pub2 | sexually transmitted infections[mh] OR sexually transmitted disease*[tiab] OR sexually transmissible disease*[tiab] OR sexually transmitted infection*[tiab] OR sexually transmissible infection*[tiab] OR sexually transmitted infectious disease*[tiab] OR sexually transmissible infectious disease*[tiab] OR sexually transmitted disorder*[tiab] OR sexually transmissible disorder*[tiab] OR STI[tiab] OR STIs[tiab] OR STD[tiab] OR STIs[tiab] OR venereal disease*[tiab] OR venereal infection*[tiab] OR venereal disorder*[tiab] OR genital herpes[tiab] OR herpes genitalis[mh] OR herpes genitalis[tiab] OR genital infection*[tiab] OR genital disorder*[tiab] OR herpes simplex[tiab] OR herpes virus[tiab] OR HSV-1[tiab] OR HSV-2[tiab] OR chancroid[mh] OR chancroid* [tiab] OR haemophilus ducreyi[tiab] OR chlamydia infection*[tiab] OR chlamydia trachomatis[mh] OR chlamydia trachomatis[tiab] OR gonorrhoea[mh] OR gonorrhoea*[tiab] OR gonorrhoea*[tiab] OR syphilis[mh] OR syphilis[tiab] OR cuminat[tiab] OR condylomata lata[tiab] OR chancre*[tiab] OR lymphogranuloma venereum[mh] OR lymphogranuloma venereum[tiab] OR granuloma Inguinale[mh] OR granuloma inguinale[tiab] OR donovania[tiab] OR donovanosis[tiab] OR calymmatobacterium[mh] OR calymmatobacterium granulomatis[tiab] OR klebsiella granulomatis[tiab] OR klebsiella granulomatis[tiab] OR treponema pallidum[mh] OR treponema pallidum[tiab] OR genital wart*[tiab] OR venereal wart*[tiab] OR condylomata cuminate[mh] OR human papillomavirus 6[mh] OR hpv-6[tiab] OR hpv-11[tiab] OR hpv6[tiab] OR human papillomavirus[tiab] OR hepatitis b[mh] OR hepatitis b[tiab] OR trichomonas vaginitis[mh] OR trichomonas vaginitis[tiab] OR genital ulcer*[tiab] OR anogenital ulcer*[tiab] OR anorectal ulcer*[tiab] OR anorectal ulcer*[tiab] OR penile ulcer*[tiab] OR blood-borne pathogen*[tiab] OR blood-borne infection*[tiab] OR blood-borne virus*[tiab] |
| Search #4                                                                                                                                                                                                                                                                                                                                                                                                                                                                                                                  | #1 OR #3                                                                                                                                                                                                                                                                                                                                                                                                                                                                                                                                                                                                                                                                                                                                                                                                                                                                                                                                                                                                                                                                                                                                                                                                                                                                                                                                                                                                                                                                                                                                                                                                                                                                                                                                                                                                                                                                                                                                                     |
| Search #5                                                                                                                                                                                                                                                                                                                                                                                                                                                                                                                  | #2 AND #4                                                                                                                                                                                                                                                                                                                                                                                                                                                                                                                                                                                                                                                                                                                                                                                                                                                                                                                                                                                                                                                                                                                                                                                                                                                                                                                                                                                                                                                                                                                                                                                                                                                                                                                                                                                                                                                                                                                                                    |

## Appendix 2: Abstraction table.

| Combined Innovations                         | Author               | Study Design                                   | Participants/<br>Country                                  | STBBI             | Intervention                                                                                          | Measure/Metric                                                                                                                                                                               | Results (MD=Mean difference, RR=risk ratio, IRR=incidence rate ratio, HR=hazard ratio, SD= standard deviation, 95% CI when presented. M=months, W=weeks)                                                                                                                                                                                                                                                                                                                        |
|----------------------------------------------|----------------------|------------------------------------------------|-----------------------------------------------------------|-------------------|-------------------------------------------------------------------------------------------------------|----------------------------------------------------------------------------------------------------------------------------------------------------------------------------------------------|---------------------------------------------------------------------------------------------------------------------------------------------------------------------------------------------------------------------------------------------------------------------------------------------------------------------------------------------------------------------------------------------------------------------------------------------------------------------------------|
| Online campaign + SMS + TV.                  | Friedman 2014        | Quasi-experimental: HxCtrl w/ population data. | ≤25 yrs, USA. n=N/A                                       | HIV, CT, GC       | GetYourselfTested: TV campaign w/ website & SMS service for STI info & clinic locator.                | ATT testing: Attendance rate.<br>Acceptability: Number of followers.<br>Feasibility: Referral rate.                                                                                          | 41.2% more CT tests in 2010 vs. 2008, 90.5% more GC tests, and 190.3% more HIV tests.<br>4477 FB followers and 1994 Twitter followers at yr 2.<br>83,404 referrals using clinic locator in yr1. 61,119 in yr2.                                                                                                                                                                                                                                                                  |
| Interactive website + SMS + cash incentives. | Horvath 2013         | RCT                                            | HIV+ Gay/Bi-sexual men 18+ yrs, USA. n=67(Int) n=57(Ctrl) | HIV               | Online self-monitoring system w/ interactive interface + optional SMS reminders +\$25 gift card draw. | ART in PVLA: Self-report.<br>[Difference scores: DS = FU-baseline]<br>ART in PVLA: Self-report.<br>ART in PVLA: Self-report.<br>Acceptability: Self-report.<br>Feasibility: Completion rate. | No difference. (DS=0.54, SD=25.2 vs. DS=-3.2, SD=24.5; t(107)=1.79, p=0.43) / No impact.<br>Increased adherence in drug users (DS= 7.1, SD= 22.1 vs. DS= -24, SD= 30.5; t(17)=2.52, p=0.02) / Effective.<br>Trend to taking meds within 2hrs of scheduled dose. DS=6.6, SD=29.3 vs. DS=-3, SD=29.6; t(105)=1.68, p=0.1 / No impact.<br>Mean score = 5.7 on 7-point Likert Scale for satisfaction / Highly acceptable.<br>Completion rate 88% vs. 93% in Ctrl / Highly feasible. |
| Website + SMS                                | Gotz 2014            | Cross-sectional study.                         | STI index patients at clinic, NLD. n=988                  | HIV, CT, GC, syph | Suggestatest.nl: online partner notification via SMS/email.                                           | PN: % partners notified.                                                                                                                                                                     | 14% notifications via SAT. 505 notifications sent (84% by SMS, 15% by email). 56% read notification. 20% visited one of 2 STI clinics.                                                                                                                                                                                                                                                                                                                                          |
| Social media + SMS.                          | Hightow-Weidman 2014 | Quasi-experimental: HxCtrl.                    | HIV+ or syphilis+ patients, USA. n=362(Int) n=133(HxCtrl) | HIV, syphilis     | Notification on social networking sites + SMS                                                         | PN: % partners notified.                                                                                                                                                                     | 63.5% of contacts notified via internet in 2011 vs. 26% in 2010.                                                                                                                                                                                                                                                                                                                                                                                                                |
| PC/SMS/MMS + WhatsApp messages               | John 2016            | UnCtrlled trial.                               | HIV+ non-disclosed, 15-29 yrs, NGA. n=19                  | HIV               | Weekly counselling, educational & motivational calls, SMS/MMS and WhatsApp messages over 3M.          | Self-care: Self-report.                                                                                                                                                                      | Significant increase in self-care performance at 6MI (p=0.002)/ Effective.                                                                                                                                                                                                                                                                                                                                                                                                      |
| Interactive website + SMS                    | Hightow-Weidman 2015 | Feasibility study.                             | Black MSM & transwomen 18-30 yrs, USA. n=15               | HIV               | HealthMpowerment.org: online community networking Int to reduce STI risk + health promotion messages. | Acceptability: Self-report.<br>Feasibility: Retention rate.                                                                                                                                  | 86.7%-100% strongly agreed w/ acceptability questions / Highly acceptable.<br>100% retention rate. 7/15 participants used the site 1W after study ended / Highly feasible.                                                                                                                                                                                                                                                                                                      |
| Mobile app + SMS                             | Hirsch-Moverman 2017 | Feasibility study.                             | ≥18yrs, HIV+/TB, LSO. n=171                               | HIV/TB            | CommCare application used to automatically send SMS medication reminders over 29M                     | Acceptability: Self-report.                                                                                                                                                                  | 41.9% think SMS facilitated adherence to TB /ART medication / Less acceptable.                                                                                                                                                                                                                                                                                                                                                                                                  |

|   |                         |              |                   |                                                   |     |                                                                              |                               |                                                                                                                                                                          |
|---|-------------------------|--------------|-------------------|---------------------------------------------------|-----|------------------------------------------------------------------------------|-------------------------------|--------------------------------------------------------------------------------------------------------------------------------------------------------------------------|
| 1 | <b>Mobile app + SMS</b> | Aronson 2016 | Feasibility study | 18-24 yrs, USA.<br>n=100                          | HIV | App assessing risk and sending SMS to encourage re-testing of HIV negatives. | Feasibility: Completion rate  | 98/100 completed the app process/ Highly feasible<br>30/100 accepted to receive HIV test<br>21/30 accepted to receive SMS<br>1/21 re-tested after 90 days window period. |
| 2 |                         |              |                   |                                                   |     |                                                                              |                               |                                                                                                                                                                          |
| 3 | <b>Website + SMS</b>    | Dokkum 2012  | UnCtrlled trial.  | 16-29 yrs, NLD.<br>n=52600(Rd 1)<br>n=41700(Rd 2) | CT  | At-home CT test + SMS/email to return test for analysis.                     | Feasibility: Completion rate. | Higher retesting rates (From 10% w/o reminders to 14% in round 1; from 7% to 10% in round 2) / Less feasible.                                                            |
| 4 |                         |              |                   |                                                   |     |                                                                              |                               |                                                                                                                                                                          |
| 5 |                         |              |                   |                                                   |     |                                                                              |                               |                                                                                                                                                                          |
| 6 |                         |              |                   |                                                   |     |                                                                              |                               |                                                                                                                                                                          |

7 **Note:** Int= intervention; Ctrl= control; HxCtrl= historical control; PB= preventative behaviors (i.e. risk reduction); PN= partner notification; TAT= turnaround time; ATT= attendance rate; ART= ART adherence; NAPs= non-adherent patients; AP= adherent patients; PVLA= Patients with various levels of adherence; TNPs= Treatment naive patients; VL= viral load; CD4= CD4 cell count; PC= phone call; FB= Facebook.

For peer review only

10  
11  
12  
13  
14  
15  
16  
17  
18  
19  
20  
21  
22  
23  
24  
25  
26  
27  
28  
29  
30  
31  
32  
33  
34  
35  
36  
37  
38  
39  
40  
41  
42  
43  
44  
45  
46  
47  
48  
49

| Internet-based eHealth Innovation                                                                              | Author         | Study Design                                   | Participants/ Country                                                 | STBBI                 | Intervention                                                                                                                                    | Measure/Metric                                                                                           | Results (MD=Mean difference, RR=risk ratio, IRR=incidence rate ratio, HR=hazard ratio, SD= standard deviation, 95% CI when presented. M=months, W=weeks)                                                                                                                                                                                                                                                                         |
|----------------------------------------------------------------------------------------------------------------|----------------|------------------------------------------------|-----------------------------------------------------------------------|-----------------------|-------------------------------------------------------------------------------------------------------------------------------------------------|----------------------------------------------------------------------------------------------------------|----------------------------------------------------------------------------------------------------------------------------------------------------------------------------------------------------------------------------------------------------------------------------------------------------------------------------------------------------------------------------------------------------------------------------------|
| 1<br>2<br>3<br>4<br>5<br>6<br>7<br>8<br>9<br>10<br>11<br>12                                                    | Downshen 2015  | Quasi-experimental: HxCtrl w/ population data. | 13-17 yrs, USA. n=1500                                                | HIV, CT, GC, syphilis | IknowUshould2: social-media campaign w/ website for STI info & clinic locator.                                                                  | ATT testing: Attendance rate.<br>Acceptability: Number of followers.                                     | More syphilis tests (18.8% vs. 5.4%; p<0.01) and HIV tests (19.0% vs. 5.4%; p<0.01). No change for CT & GC / Effective.<br>1500+ unique website interactions. 128 FB likes; 46 Twitter followers; 390 Youtube views; 42 Instagram followers.                                                                                                                                                                                     |
| 13<br>14<br>15<br>16<br>17<br>18<br>19                                                                         | Elliot 2016    | Cross-sectional study.                         | MSM, GBR. n=17361                                                     | HIV                   | Promotion through Gaydar, Grindr, Recon and FB pages to order free postal HIV home sampling kits                                                | ATT testing: Participation rate.<br>Acceptability: Self-report.                                          | 10 323/11 127 (93%) ordered HIV sample kit. 5696/10 323 (55%) returned sample kit within 24M. 82/5696 (1.4%) confirmed new diagnosis and in care.<br>59.7% would recommend to someone expected to test positive (93.8% if expected to negative). 64% clicked for more info on test. / Moderately acceptable.                                                                                                                     |
| 20<br>21<br>22<br>23<br>24<br>25<br>26<br>27                                                                   | Huang 2016     | Cross-sectional                                | ≥18yrs, Black/African American or Hispanic/Latino MSM, USA. n=122     | HIV                   | Promoting of HIV self-testing for 6W on Grindr + study website to order self-test kit                                                           | ATT testing: Participation rate.<br>Acceptability: Number of followers<br>Feasibility: Completion rate.  | 122 requested tests; 55/57 HIV-, 2/57 HIV+.<br>11 939 unique website visitors; 2.8% click-through rate<br>334 tests requested.<br>122/334 visitors were eligible and completed baseline survey, 81/122 confirmed receiving self test kit, 57/122 completed follow-up survey / Less feasible.                                                                                                                                     |
| 28<br>29<br>30<br>31<br>32<br>33<br>34<br>35<br>36<br>37<br>38<br>39<br>40<br>41<br>42<br>43<br>44<br>45<br>46 | Jones 2015     | Cross-sectional study.                         | MSM, GBR. n=305                                                       | HIV                   | Health promotion and offer of rapid at-home testing via FB, Grindr, and Squirt.                                                                 | ATT testing: Participation rate.<br>Acceptability: Number of followers.<br>Feasibility: Completion rate. | 5/5 high risk sexual behavior but tested HIV negative; 1/5 never tested before; 3/5 not tested in many yrs.<br>103 clicked FB survey; 152 approached on Grindr; 50 Squirt contacts.<br>FB: 6/103 completed survey; 3/6 requested HIV test; 2/3 made appointment. Grindr: 20/152 engaged; 6/20 requests for at home test; 3/6 made appointment. Squirt: 3/50 engaged and 0/3 test requests / Less feasible.                       |
| 47<br>48<br>49                                                                                                 | Rhodes 2016    | Quasi-experimental.                            | MSM & transgender, USA n=339 (Int) n=286 (Ctrl)                       | HIV                   | Posting info and answering questions on HIV testing on social media sites (Adam4Adam, BlackGayChat, Craigslist, and Gay.com).                   | ATT testing: Self-report.                                                                                | 63.7% of intervention participants reported past 12M HIV testing compared with 42.0% of control.<br>Adjusted OR= 2.9 (1.8-4.7)/ Effective.                                                                                                                                                                                                                                                                                       |
|                                                                                                                | Rosengren 2016 | Cross-sectional                                | Black or Hispanic MSM 18+ yrs, USA n=56                               | HIV                   | Promotion of free rapid HIV self-testing kits on Grindr and offer of delivery via study website (kit, voucher or pin for smart vending machine) | ATT testing: Self-report.<br>Feasibility: Completion rate.<br>ART in TNPs: Self-report.                  | All 56 reported testing completion (100%); 2/56 reported positive result and linkage to care (confirmatory testing and ART initiation)<br>4389 visited the website; 333 requested test (i.e. 1 in 13 visitors); 56 completed survey 2W after request/ Less feasible.<br>Higher adherence at 3M & 6M (71.2% vs. 63.9%, d=0.17; 70.3% vs. 66.6%, d=0.09)                                                                           |
|                                                                                                                | Himelhoch 2016 | RCT                                            | 18-64yrs, history of drug/alcohol use, HIV+, USA. n=19(Int) n=9(Ctrl) | HIV                   | Heart2HAART mobile application for ART adherence                                                                                                | ART in NAPs: Pill count<br>Acceptability: Self-report.<br>Feasibility: Response rate.                    | No significant difference in adherence between intervention and control group (p=0.29), but adherence was 100% in both at 3M / No impact<br>94.3% strongly agreed/agreed Heart2HAART helped them take their medication / Highly acceptable.<br>App was used on avg 21.4, 19.1 and 16.4 times in months 1, 2 and 3. Participants responded to medication prompts on avg 18, 16 and 14 times during months 1,2 and 3 respectively. |

|                                                                |                                        |                         |                             |                                                                                     |     |                                                                                                                           |                                                                                                                                                                              |                                                                                                                                                                                                                                                                                                                                                                                                                                                                                                                                             |
|----------------------------------------------------------------|----------------------------------------|-------------------------|-----------------------------|-------------------------------------------------------------------------------------|-----|---------------------------------------------------------------------------------------------------------------------------|------------------------------------------------------------------------------------------------------------------------------------------------------------------------------|---------------------------------------------------------------------------------------------------------------------------------------------------------------------------------------------------------------------------------------------------------------------------------------------------------------------------------------------------------------------------------------------------------------------------------------------------------------------------------------------------------------------------------------------|
| 1<br>2<br>3<br>4<br>5<br>6<br>7<br>8<br>9<br>10<br>11          | <b>Avatar-guided computer software</b> | Kurth 2014              | RCT                         | HIV+ 18+ yrs, USA. n=120(Int) n=120(Ctrl)                                           | HIV | Audio narrated risk assessment, skill building videos, tailored feedback and printouts vs. computer risk assessment only. | ART in PVLA: VL.<br>ART in PVLA: Self-report.<br>PB: Self-report.<br>Acceptability: Self-report.<br>Feasibility: Retention rate.                                             | Non-significant change. (log10VL= -0.06(-0.4 to -0.3), p=0.74). Significant in subgroup w/ detectable VL at baseline (-0.73(-1.42 to -0.03), p=0.041) / No impact.<br>Increased adherence. (4.71(0.95- 8.48) increase vs. 1.39(6.03 to 3.24) decrease; p=0.046) / Effective.<br>Lower odds of HIV transmission (OR=0.46 (0.25-0.84), p=0.012) / Effective.<br>97% reported ease of use and high privacy; 99% satisfied w/ session length; 75% preferred it over human counsellor / Highly acceptable.<br>87.1% retention / Highly feasible. |
| 12<br>13<br>14<br>15<br>16<br>17                               | <b>Avatar-guided computer program</b>  | Naar-King 2012          | RCT                         | HIV+ 16-24 yrs, USA. n=36(Int) n=40(Ctrl)                                           | HIV | 2-D animated character delivering personalized health feedback vs. character giving nutrition info.                       | ART in TNPs: VL.<br>ART in TNPs: Self-report.<br>Acceptability: Self-report.                                                                                                 | Larger suppression rate. (Cohen's d=0.09 at 3M; d= 0.28 at 6M). Larger drop in VL from baseline (d=0.39 at 3M & d=0.19 at 6M).<br>Higher adherence at 3M & 6M (71.2% vs. 63.9%, d=0.17; 70.3% vs. 66.6%, d=0.09)<br>Mean satisfaction ratings 3.7 out of 4 / Highly acceptable.                                                                                                                                                                                                                                                             |
| 18<br>19<br>20<br>21<br>22<br>23<br>24<br>25<br>26<br>27<br>28 | <b>Mobile phone application</b>        | Perera 2014             | RCT                         | HIV+, NZ. n=17(Int) n=11(Ctrl)                                                      | HIV | ART adherence app w/ medication clock & graphs on disease-state vs. standard app (medication clock only)                  | ART in PVLA: Self-report.<br>ART in PVLA: Pharmacy refills.<br>ART in PVLA: VL.<br>ART in PVLA: Composite score (refills, VL, & self-report).<br>Acceptability: Self-report. | Increased adherence (F(1,23)=5.37, p=0.03) / Effective.<br>No difference. (F(1,25)=1.88, p=0.18) / No impact.<br>Lower VL at 3M (F(1,23)=5.62, p=0.023) / Effective.<br>Increased adherence (53% to 13%, X2(1,15)=6, p=0.03). No change in Ctrl (27% to 27%, X2(1,11)=0.00, p>0.99) / Effective.<br>More satisfying (on 11 point-scale: 5.88 vs. 3.27, p=0.017) and informative (6 vs. 3, p=0.034) at 3M than standard app / Highly acceptable.                                                                                             |
| 29<br>30<br>31<br>32                                           | <b>Mobile app + cash incentive</b>     | Brayboy 2017            | UnCtrlled trial.            | 12-17yrs, USA. n=17                                                                 | STI | GirlTalk mobile phone app to assess knowledge increase                                                                    | PB: Self-report.<br>Acceptability: Self-report.                                                                                                                              | 75.6% to 79% increase in knowledge pre and post app use at 2W. / No impact.<br>94.1% would use the app again/recommend it / Highly acceptable                                                                                                                                                                                                                                                                                                                                                                                               |
| 33<br>34<br>35                                                 | <b>Social media</b>                    | Jones 2012              | Quasi-experimental: HxCtrl. | 15-24 yrs, USA. n=70/896 FB friends                                                 | CT  | Educational FB site addressing safe sexual health.                                                                        | PB: Self-report.                                                                                                                                                             | Condom from 57% to 80%. 54% reduction in CT in ages 15-17 from previous yrs (but 42% less tests done).                                                                                                                                                                                                                                                                                                                                                                                                                                      |
| 36<br>37<br>38<br>39<br>40                                     | <b>Videos vs. SMS</b>                  | Jones 2013              | RCT                         | High-risk urban African-American women 18-29 yrs, USA. n=117(Soap opera) n=121(SMS) | HIV | Weekly soap opera episodes (Love, Sex & Choices) vs. HIV prevention SMS.                                                  | PB: Self-report.<br>Acceptability: Self-report.                                                                                                                              | 18% greater reduction in Int. group, p=0.23 / No impact.<br>78% reduction in risky acts from baseline in Int. group (p<0.001); 72% reduction from baseline in Ctrl (p<0.001)/ Effective<br>97.4% liked the videos / Highly acceptable.                                                                                                                                                                                                                                                                                                      |
| 41<br>42<br>43<br>44<br>45                                     | <b>Social media + video chat</b>       | Lelutiu-Weinberger 2014 | UnCtrlled trial.            | MSM 18-29 yrs, high risk for STI, USA. n=31                                         | HIV | miCHAT: FB chat Int. 8 motivational interviews to reduce HIV risk + CBT training.                                         | PB: Self-report.<br>Acceptability: Self-report.<br>Feasibility: Completion rate.                                                                                             | Decrease in unprotected anal sex acts (3.11 vs. 8.96; p=0.042).<br>Increased knowledge of sexual risk (p=0.01) / Effective.<br>All felt privacy was ensured / Highly acceptable.<br>46% completed baseline assessment + minimum 5 sessions / Less feasible.                                                                                                                                                                                                                                                                                 |

|    |                                                         |               |                    |                                                           |                         |                                                                                                                                                                    |                                                                |                                                                                                                                                                                                                                                                        |
|----|---------------------------------------------------------|---------------|--------------------|-----------------------------------------------------------|-------------------------|--------------------------------------------------------------------------------------------------------------------------------------------------------------------|----------------------------------------------------------------|------------------------------------------------------------------------------------------------------------------------------------------------------------------------------------------------------------------------------------------------------------------------|
| 1  | <b>Social media campaign + website + cash incentive</b> | Solorio 2016  | Feasibility study. | Hispanic MSM, 18-30 yrs, USA<br>n=50                      | HIV                     | Radio & social media-based campaign for 16W to encourage testing & condom use + website w/clinic locator to provide free HIV home testing kits and linkage to care | PB: self-report.<br>Feasibility: Self-report.                  | No significant change in condom use at 16W (26.1% vs. 15.65, OR=1.9 (0.6-5.9))/ No impact.<br>32/50 (64%) requested HIV home testing kit, 28/32 (88%) completed the test/ Moderately feasible.                                                                         |
| 2  |                                                         |               |                    |                                                           |                         |                                                                                                                                                                    |                                                                |                                                                                                                                                                                                                                                                        |
| 3  |                                                         |               |                    |                                                           |                         |                                                                                                                                                                    |                                                                |                                                                                                                                                                                                                                                                        |
| 4  |                                                         |               |                    |                                                           |                         |                                                                                                                                                                    |                                                                |                                                                                                                                                                                                                                                                        |
| 5  |                                                         |               |                    |                                                           |                         |                                                                                                                                                                    |                                                                |                                                                                                                                                                                                                                                                        |
| 6  | <b>Mobile app</b>                                       | Jeon 2016     | RCT.               | Chronic HBV+, 19-60 yrs, KOR<br>n=26 (Int)<br>n=27 (Ctrl) | HBV                     | App to increase disease knowledge, set alarm medication reminders, record lab nutrition & physical activity data, and chat with other users.                       | Self-care: Self-report.<br>Feasibility: Utilisation rate.      | Significantly higher self-care performance in intervention vs. control (t=3.597, p=0.001)/ Effective.<br>Average monthly utilisation rate was 75.1%/ Highly feasible.                                                                                                  |
| 7  |                                                         |               |                    |                                                           |                         |                                                                                                                                                                    |                                                                |                                                                                                                                                                                                                                                                        |
| 8  |                                                         |               |                    |                                                           |                         |                                                                                                                                                                    |                                                                |                                                                                                                                                                                                                                                                        |
| 9  |                                                         |               |                    |                                                           |                         |                                                                                                                                                                    |                                                                |                                                                                                                                                                                                                                                                        |
| 10 |                                                         |               |                    |                                                           |                         |                                                                                                                                                                    |                                                                |                                                                                                                                                                                                                                                                        |
| 11 |                                                         |               |                    |                                                           |                         |                                                                                                                                                                    |                                                                |                                                                                                                                                                                                                                                                        |
| 12 | <b>Social media</b>                                     | Henwood 2016  | Feasibility study. | 12-25 yrs, HIV+, ZAF<br>n=90                              | HIV                     | Use of MXit as support group for HIV+ youth                                                                                                                        | Acceptability: Self-report.<br>Feasibility: Participation rate | 84% would like chat-room to continue / Highly acceptable.<br>33% ever visited MXit chat-room / Less feasible.                                                                                                                                                          |
| 13 |                                                         |               |                    |                                                           |                         |                                                                                                                                                                    |                                                                |                                                                                                                                                                                                                                                                        |
| 14 |                                                         |               |                    |                                                           |                         |                                                                                                                                                                    |                                                                |                                                                                                                                                                                                                                                                        |
| 15 | <b>Mobile app + cash incentive</b>                      | Przybyla 2016 | Feasibility study. | HIV + on ART, 18+ yrs, USA<br>n=27                        | HIV                     | DRUM app to report daily on ART adherence and substance abuse.                                                                                                     | Acceptability: Self-report.<br>Feasibility: Completion rate.   | 84% reported the app was easy to use; 96% were satisfied; 92% would use it in the future/ Highly acceptable.<br>Overall completion rate of daily reports after 2W= 95.3%/ Highly feasible.                                                                             |
| 16 |                                                         |               |                    |                                                           |                         |                                                                                                                                                                    |                                                                |                                                                                                                                                                                                                                                                        |
| 17 |                                                         |               |                    |                                                           |                         |                                                                                                                                                                    |                                                                |                                                                                                                                                                                                                                                                        |
| 18 |                                                         |               |                    |                                                           |                         |                                                                                                                                                                    |                                                                |                                                                                                                                                                                                                                                                        |
| 19 | <b>Telemedicine</b>                                     | Talal 2016    | Feasibility study. | Individuals on opioid agonist tx, USA<br>n=54             | HCV                     | Telemedicine-based medical tx with hepatologist                                                                                                                    | Acceptability: Self-report.<br>Feasibility: Completion rate.   | 88.9% prefer medical tx using telemedicine vs. clinic visit; 100% would recommend it to a friend/ Highly acceptable.<br>54 tested HCV+ over 14M; 81.5% started evaluation/tx; 75% of those given tx have completed it/ Highly feasible.                                |
| 20 |                                                         |               |                    |                                                           |                         |                                                                                                                                                                    |                                                                |                                                                                                                                                                                                                                                                        |
| 21 |                                                         |               |                    |                                                           |                         |                                                                                                                                                                    |                                                                |                                                                                                                                                                                                                                                                        |
| 22 |                                                         |               |                    |                                                           |                         |                                                                                                                                                                    |                                                                |                                                                                                                                                                                                                                                                        |
| 23 | <b>Social media</b>                                     | Garett 2016   | Feasibility study. | 18+yrs, MSM, PER<br>n=102(Int)<br>n=109(Ctrl)             | HIV                     | 12W FB based peer-led intervention to increase HIV testing and prevention behaviour.                                                                               | Acceptability: Self-report.                                    | Intervention group felt they learned more about; where to receive sexual health services (p-value=0.0061), more likely to have safe sex (p-value=0.034) and more likely to get tested for HIV regularly (p-value=0.021) compared to control group / Highly acceptable. |
| 24 |                                                         |               |                    |                                                           |                         |                                                                                                                                                                    |                                                                |                                                                                                                                                                                                                                                                        |
| 25 |                                                         |               |                    |                                                           |                         |                                                                                                                                                                    |                                                                |                                                                                                                                                                                                                                                                        |
| 26 |                                                         |               |                    |                                                           |                         |                                                                                                                                                                    |                                                                |                                                                                                                                                                                                                                                                        |
| 27 | <b>Website</b>                                          | Polilli 2016  | Feasibility study. | Residents of Abruzzo Region, ITA<br>n=3500                | HIV, syphilis, HBV, HCV | Website with STI info, risk calculator, and appointments booking at testing sites.                                                                                 | Feasibility: Completion rate.                                  | 3500 booked an appointment; 3046 (87%) presented for testing within 15M study period/ Highly feasible.                                                                                                                                                                 |
| 28 |                                                         |               |                    |                                                           |                         |                                                                                                                                                                    |                                                                |                                                                                                                                                                                                                                                                        |
| 29 |                                                         |               |                    |                                                           |                         |                                                                                                                                                                    |                                                                |                                                                                                                                                                                                                                                                        |

30 **Note:** Int= intervention; Ctrl= control; HxCtrl= historical control; PB= preventative behaviors (i.e. risk reduction); PN= partner notification; TAT= turnaround time; ATT= attendance rate; ART= ART adherence; NAPs= non-adherent patients; AP= adherent patients; PVLA= Patients with various levels of adherence; TNPs= Treatment naive patients; VL= viral load; CD4= CD4 cell count; PC= phone call; FB= Facebook.



| Basic mHealth Innovation                     | Author                                                                                                                                     | Study Design                           | Participants/<br>Country                                                                       | STBBI              | Intervention                                                                                                                                         | Measure/Metric                                                               | Results (MD=Mean difference, RR=risk ratio, IRR=incidence rate ratio, HR=hazard ratio, SD= standard deviation, 95% CI when presented. M=months, W=weeks)                                                                                                                                                 |
|----------------------------------------------|--------------------------------------------------------------------------------------------------------------------------------------------|----------------------------------------|------------------------------------------------------------------------------------------------|--------------------|------------------------------------------------------------------------------------------------------------------------------------------------------|------------------------------------------------------------------------------|----------------------------------------------------------------------------------------------------------------------------------------------------------------------------------------------------------------------------------------------------------------------------------------------------------|
| 1<br>2<br>3 SMS                              | Bailey 2014                                                                                                                                | UnCtrlled trial.                       | CT+ at clinic, AUS.<br>n=64                                                                    | CT                 | SMS reminders to recall for treatment.                                                                                                               | ATT treatment:<br>Attendance rate.<br>Feasibility: Response rate.            | 100% treated for CT infection. 72% treated within 1 day of SMS.<br>94% replied to SMS, 84% the same day / Highly feasible.                                                                                                                                                                               |
| 4<br>5<br>6<br>7<br>8 SMS + PC               | Bassett 2016                                                                                                                               | RCT                                    | ≥18yrs, ZAF.<br>n=543(Int)<br>n=471(Ctrl)                                                      | HIV/TB             | 5 scheduled PC) and 4 SMS, reminders to retrieve test results and attend appointments, over 4M.                                                      | ATT treatment:<br>Attendance rate.                                           | No significant difference in reaching outcome at 9M (3M ART treatment or 3+6M of TB treatment) between intervention and control (39% vs 42%, RR=0.93, 95%CI 0.80-1.08) / No Impact                                                                                                                       |
| 9<br>10<br>11<br>12 SMS + PC                 | Bigna 2014                                                                                                                                 | RCT                                    | Caregivers of HIV + children 18+ yrs, CMR.<br>n=61(SMS+PC)<br>n=60(PC) n=60(SMS)<br>n=61(Ctrl) | HIV                | SMS+PC, SMS, or PC appointment reminders.                                                                                                            | ATT FU appointment:<br>Attendance rate.                                      | Improved attendance. (OR=2.9 (1.3-6.3), p=0.012) / Effective.                                                                                                                                                                                                                                            |
| 13<br>14<br>15<br>16<br>17<br>18 SMS         | Brook 2013                                                                                                                                 | Quasi-experimental:<br>HxCtrl.         | Sexual health clinic, GBR. n=207(Int)<br>n=169(HxCtrl)                                         | HIV, syphilis, HBV | SMS reminders.                                                                                                                                       | ATT testing:<br>Attendance rate.                                             | Higher retesting rate (41% vs. 28%; p<0.001) / Effective.                                                                                                                                                                                                                                                |
| 19<br>20<br>21 SMS                           | Brook 2013                                                                                                                                 | Quasi-experimental:<br>HxCtrl.         | Sexual health clinic, GBR. n=699(Int)<br>n=768(HxCtrl)                                         | HIV                | SMS reminders 2 days before appointment.                                                                                                             | ATT FU appointment: LTFU rate.                                               | 35% improvement in overall LTFU rate (26% to 17%; p<0.0001) / Effective.                                                                                                                                                                                                                                 |
| 22<br>23<br>24 SMS                           | Burton 2013                                                                                                                                | Quasi-experimental:<br>HxCtrl.         | High risk for STI at clinic, GBR.<br>n=273(Int)<br>n=266(Ctrl)                                 | CT, GC             | SMS STI testing reminders.                                                                                                                           | ATT: testing:<br>Attendance rate.                                            | No change in retesting rates for those w/ recent CT or GC. (CT: 36% vs.33%; p=0.79) (GC: 19% vs. 33%; p=0.48) / No impact.                                                                                                                                                                               |
| 25<br>26<br>27<br>28 SMS                     | Coleman 2017                                                                                                                               | Retrospective Quasi-experimental       | >=18 yrs, HIV+ pregnant women, ZAF.<br>n=192(Int)<br>n=447(Ctrl)                               | HIV                | Bi-weekly maternal health info sent throughout pregnancy and for one year after birth to increase HIV PCR testing postpartum and increase ANC visits | ATT testing:<br>Attendance rate.<br>PB: Infection rate                       | 81.3% vs 75.4% in intervention vs control group likely to attend first PCR 6W postpartum. 40% increase in the likelihood of attending the recommended four ANC visits among individuals within the intervention group (RR: 1.41, CI: 1.15–1.72) / Effective.<br>3 infants born with HIV in control group |
| 29<br>30<br>31<br>32<br>33<br>34 SMS         | Desai 2014                                                                                                                                 | Quasi-experimental:<br>Conc. + HxCtrl. | High risk MSM at clinic, GBR. n=31(Int)<br>n=656(Conc. Ctrl)<br>n=745(HxCtrl)                  | HIV                | SMS HIV/STI testing reminders.                                                                                                                       | ATT testing:<br>Attendance rate.                                             | No significant change in re-testing odds. (32% in SMS vs.30% in Conc. Ctrl; OR=1.1(0.5-2.4) and 17% in HxCtrl; OR=2.3(1.0-4.9) / No impact.                                                                                                                                                              |
| 35<br>36<br>37<br>38 SMS + cash incentive    | Downing 2013                                                                                                                               | RCT                                    | CT + or suspected at clinic 16+ yrs, AUS.<br>n=30(Int) n=32(Ctrl)                              | CT                 | SMS appointment reminders + \$10 if attended.                                                                                                        | ATT testing:<br>Attendance rate.                                             | Increased re-testing rate at 10-12W post CT treatment (without cash 26.7% vs. 6.3% in Ctrl; p=0.04); (with cash 28.1% vs. 6.3% in Ctrl; p=0.043) / Effective.                                                                                                                                            |
| 39<br>40<br>41 SMS                           | Evans 2015                                                                                                                                 | UnCtrlled trial.                       | African community, GBR. n=172                                                                  | HIV                | 2 weekly Health Belief Model SMS to reduce risky sexual behaviours.                                                                                  | ATT testing: Self-report.<br>PB: Self-report.<br>Acceptability: Self-report. | 10.5% reported being tested for HIV during/after the 12W Int.<br>Non-significant increase in HIV knowledge & attitudes / No impact.<br>Acceptable & useful. Majority shared w/ others and want to get tested in future.                                                                                  |
| 42<br>43<br>44<br>45<br>46<br>47<br>48<br>49 | For peer review only - <a href="http://bmjopen.bmj.com/site/about/guidelines.xhtml">http://bmjopen.bmj.com/site/about/guidelines.xhtml</a> |                                        |                                                                                                |                    |                                                                                                                                                      |                                                                              |                                                                                                                                                                                                                                                                                                          |

|    |            |                              |                                        |                                                                                                                              |     |                                                                                                                      |                                                                                                                                  |                                                                                                                                                                                                                                                                                                                                                                                                                                                                         |
|----|------------|------------------------------|----------------------------------------|------------------------------------------------------------------------------------------------------------------------------|-----|----------------------------------------------------------------------------------------------------------------------|----------------------------------------------------------------------------------------------------------------------------------|-------------------------------------------------------------------------------------------------------------------------------------------------------------------------------------------------------------------------------------------------------------------------------------------------------------------------------------------------------------------------------------------------------------------------------------------------------------------------|
| 1  | SMS        | Farmer 2014                  | Quasi-experimental:<br>HxCtrl.         | HIV clinic attendees,<br>GBR. n=951(Int)<br>n=822(HxCtrl)                                                                    | HIV | SMS reminder 2 days<br>before appointment.                                                                           | ATT FU<br>appointment: LTFU<br>& cancellation rate.                                                                              | No difference in LTFU (25% vs.28%) or cancellation (62% vs.64%) / No<br>impact.                                                                                                                                                                                                                                                                                                                                                                                         |
| 2  |            |                              |                                        |                                                                                                                              |     |                                                                                                                      |                                                                                                                                  |                                                                                                                                                                                                                                                                                                                                                                                                                                                                         |
| 3  | SMS        | Finocchario-<br>Kessler 2014 | Quasi-experimental:<br>HxCtrl.         | HIV+ mother-infant<br>pairs, KEN.<br>n=523(Int)<br>n=320(HxCtrl)                                                             | HIV | SMS notification of<br>available test results and<br>appointment reminder.                                           | ATT treatment:<br>Attendance rate.<br>TAT: Time from test<br>to diagnosis & test to<br>treat.<br>Feasibility: Retention<br>rate. | More infants initiated on ART (Urban: 11/11 vs. 1/7, p<0.001; Peri-urban:<br>14/14 vs. 9/14, p<0.05) / Effective.<br>Shorter median time to diagnosis (5 vs. 6.3W (urban) & 3.4 vs. 8.1W (peri-<br>urban); both p<0.001). Shorter median time to treat (13 vs. 40 days (urban)<br>& 1 vs. 36 days (peri-urban); p<0.001) / Effective.<br>Retention rate double at 9M post-natal (45.1% vs. 93% (urban) and 43.2%<br>vs. 94.1% (peri-urban); p<0.001) / Highly feasible. |
| 4  |            |                              |                                        |                                                                                                                              |     |                                                                                                                      |                                                                                                                                  |                                                                                                                                                                                                                                                                                                                                                                                                                                                                         |
| 5  |            |                              |                                        |                                                                                                                              |     |                                                                                                                      |                                                                                                                                  |                                                                                                                                                                                                                                                                                                                                                                                                                                                                         |
| 6  |            |                              |                                        |                                                                                                                              |     |                                                                                                                      |                                                                                                                                  |                                                                                                                                                                                                                                                                                                                                                                                                                                                                         |
| 7  |            |                              |                                        |                                                                                                                              |     |                                                                                                                      |                                                                                                                                  |                                                                                                                                                                                                                                                                                                                                                                                                                                                                         |
| 8  |            |                              |                                        |                                                                                                                              |     |                                                                                                                      |                                                                                                                                  |                                                                                                                                                                                                                                                                                                                                                                                                                                                                         |
| 9  |            |                              |                                        |                                                                                                                              |     |                                                                                                                      |                                                                                                                                  |                                                                                                                                                                                                                                                                                                                                                                                                                                                                         |
| 10 | SMS        | Guy 2012                     | Quasi-experimental:<br>HxCtrl.         | STI clinic, AUS.<br>n=141(Int)<br>n=338(HxCtrl)                                                                              | CT  | SMS re-testing reminder<br>3M after initial infection.                                                               | ATT testing:<br>Attendance rate.                                                                                                 | Higher retesting rate (30% 1-4M post-infection vs. 21%; p=0.04); AOR=<br>1.57(1.01-2.46) / Effective.                                                                                                                                                                                                                                                                                                                                                                   |
| 11 |            |                              |                                        |                                                                                                                              |     |                                                                                                                      |                                                                                                                                  |                                                                                                                                                                                                                                                                                                                                                                                                                                                                         |
| 12 |            |                              |                                        |                                                                                                                              |     |                                                                                                                      |                                                                                                                                  |                                                                                                                                                                                                                                                                                                                                                                                                                                                                         |
| 13 | SMS        | Joseph Davey<br>2016         | RCT.                                   | HIV+ adults on ART,<br>MOZ<br>n=416 (Int)<br>n=414 (Ctrl)                                                                    | HIV | SMS reminders 2 and 7<br>days of appointment and<br>ART drug-pick up +<br>educational SMS every<br>2M.               | ATT treatment:<br>Attendance rate.                                                                                               | Nonsignificant difference in overall retention in care at 12 M (93.8% vs<br>91%, p=0.139) / No impact.                                                                                                                                                                                                                                                                                                                                                                  |
| 14 |            |                              |                                        |                                                                                                                              |     |                                                                                                                      |                                                                                                                                  |                                                                                                                                                                                                                                                                                                                                                                                                                                                                         |
| 15 |            |                              |                                        |                                                                                                                              |     |                                                                                                                      |                                                                                                                                  |                                                                                                                                                                                                                                                                                                                                                                                                                                                                         |
| 16 |            |                              |                                        |                                                                                                                              |     |                                                                                                                      |                                                                                                                                  |                                                                                                                                                                                                                                                                                                                                                                                                                                                                         |
| 17 |            |                              |                                        |                                                                                                                              |     |                                                                                                                      |                                                                                                                                  |                                                                                                                                                                                                                                                                                                                                                                                                                                                                         |
| 18 | SMS        | Kapman 2016                  | Quasi-experimental:<br>HxCtrl.         | Heterosexual clinic<br>attendees dx & tx for<br>CT, 16-23 yrs, NLD<br>n=828 (Int)<br>n=1530 (Ctrl)                           | CT  | 2 SMS reminders at<br>5.5M & 6M after initial<br>dx with CT for retesting<br>appointment scheduling<br>& attendance. | ATT testing:<br>Attendance rate.                                                                                                 | Higher attendance rate between 5-8M after initial dx (30.6% vs. 9.2%).                                                                                                                                                                                                                                                                                                                                                                                                  |
| 19 |            |                              |                                        |                                                                                                                              |     |                                                                                                                      |                                                                                                                                  |                                                                                                                                                                                                                                                                                                                                                                                                                                                                         |
| 20 |            |                              |                                        |                                                                                                                              |     |                                                                                                                      |                                                                                                                                  |                                                                                                                                                                                                                                                                                                                                                                                                                                                                         |
| 21 |            |                              |                                        |                                                                                                                              |     |                                                                                                                      |                                                                                                                                  |                                                                                                                                                                                                                                                                                                                                                                                                                                                                         |
| 22 |            |                              |                                        |                                                                                                                              |     |                                                                                                                      |                                                                                                                                  |                                                                                                                                                                                                                                                                                                                                                                                                                                                                         |
| 23 | SMS        | Kharbanda 2011               | Quasi-experimental:<br>Conc. + HxCtrl. | Parents of girls 9-20<br>yrs at clinics, USA.<br>n=124(Int)<br>n=308(Conc. Ctrl)<br>n=1080(HxCtrl)                           | HPV | Up to 3 weekly SMS<br>vaccination reminders.                                                                         | ATT vaccination:<br>Attendance rate.                                                                                             | More likely to get vaccine on time after controlling for insurance and site of<br>care (AOR=1.83(1.23-2.71)) / Effective.                                                                                                                                                                                                                                                                                                                                               |
| 24 |            |                              |                                        |                                                                                                                              |     |                                                                                                                      |                                                                                                                                  |                                                                                                                                                                                                                                                                                                                                                                                                                                                                         |
| 25 |            |                              |                                        |                                                                                                                              |     |                                                                                                                      |                                                                                                                                  |                                                                                                                                                                                                                                                                                                                                                                                                                                                                         |
| 26 |            |                              |                                        |                                                                                                                              |     |                                                                                                                      |                                                                                                                                  |                                                                                                                                                                                                                                                                                                                                                                                                                                                                         |
| 27 |            |                              |                                        |                                                                                                                              |     |                                                                                                                      |                                                                                                                                  |                                                                                                                                                                                                                                                                                                                                                                                                                                                                         |
| 28 | SMS        | Kliner 2013                  | Quasi-experimental:<br>HxCtrl.         | HIV+ at hospital,<br>SWZ. n=162(Int)<br>n=297(HxCtrl)                                                                        | HIV | SMS reminders one day<br>before appointment.                                                                         | ATT FU<br>appointment:<br>Attendance rate.                                                                                       | No difference. SMS 83.3% vs. Ctrl 80.1%; p=0.401. AOR=1.13, p=0.662 /<br>No impact.                                                                                                                                                                                                                                                                                                                                                                                     |
| 29 |            |                              |                                        |                                                                                                                              |     |                                                                                                                      |                                                                                                                                  |                                                                                                                                                                                                                                                                                                                                                                                                                                                                         |
| 30 |            |                              |                                        |                                                                                                                              |     |                                                                                                                      |                                                                                                                                  |                                                                                                                                                                                                                                                                                                                                                                                                                                                                         |
| 31 | SMS        | Matheson 2014                | Quasi-experimental.                    | 11-22 yrs at clinic,<br>USA.<br>n=37(Int) n=232(Ctrl)                                                                        | HPV | SMS vaccination<br>reminders (3 SMS per<br>dose).                                                                    | ATT vaccination:<br>Attendance rate.                                                                                             | Higher attendance rate. HPV2 vaccine complete: 73% vs.34%, (p=0.000);<br>on-time HPV2 38% vs. 25%, (p=0.035). HPV3 complete 16% vs.6%,<br>(p=0.018); on-time HPV3 14% vs.3%, (p=0.007) / Effective.                                                                                                                                                                                                                                                                     |
| 32 |            |                              |                                        |                                                                                                                              |     |                                                                                                                      |                                                                                                                                  |                                                                                                                                                                                                                                                                                                                                                                                                                                                                         |
| 33 |            |                              |                                        |                                                                                                                              |     |                                                                                                                      |                                                                                                                                  |                                                                                                                                                                                                                                                                                                                                                                                                                                                                         |
| 34 | SMS        | McIver 2016                  | Quasi-experimental:<br>HxCtrl.         | Clinic attendees<br>susceptible to HBV<br>(HIV+, bisexual,<br>CSW, IDUs,<br>Aboriginals), AUS<br>n=241 (Int)<br>n=463 (Ctrl) | HBV | SMS reminders 1 day<br>before appointment for<br>HBV vaccine doses 2&3<br>reattendance.                              | ATT vaccination:<br>Attendance rate.                                                                                             | Nonsignificant decrease in attendance rate within 12 M (54% vs 56% for 2<br>doses, p=0.65/ 24% vs 30% for 3 doses, p=0.07) / No impact<br>Nonsignificant difference in completion of 3 doses in 12M. aOR= 0.7 (0.48-<br>1.01)/No impact.                                                                                                                                                                                                                                |
| 35 |            |                              |                                        |                                                                                                                              |     |                                                                                                                      |                                                                                                                                  |                                                                                                                                                                                                                                                                                                                                                                                                                                                                         |
| 36 |            |                              |                                        |                                                                                                                              |     |                                                                                                                      |                                                                                                                                  |                                                                                                                                                                                                                                                                                                                                                                                                                                                                         |
| 37 |            |                              |                                        |                                                                                                                              |     |                                                                                                                      |                                                                                                                                  |                                                                                                                                                                                                                                                                                                                                                                                                                                                                         |
| 38 |            |                              |                                        |                                                                                                                              |     |                                                                                                                      |                                                                                                                                  |                                                                                                                                                                                                                                                                                                                                                                                                                                                                         |
| 39 |            |                              |                                        |                                                                                                                              |     |                                                                                                                      |                                                                                                                                  |                                                                                                                                                                                                                                                                                                                                                                                                                                                                         |
| 40 | SMS        | Njuguna 2016                 | RCT.                                   | Rural women, 18-24<br>yrs, KEN<br>n=300 (Int)<br>n=300 (Ctrl)                                                                | HIV | Weekly SMS on HIV<br>and reproductive health.                                                                        | ATT testing: Self-<br>report.                                                                                                    | Significant increase in reported testing at 6M (67% vs 51%, aHR=1.54(1.25-<br>1.90) / Effective.                                                                                                                                                                                                                                                                                                                                                                        |
| 41 |            |                              |                                        |                                                                                                                              |     |                                                                                                                      |                                                                                                                                  |                                                                                                                                                                                                                                                                                                                                                                                                                                                                         |
| 42 |            |                              |                                        |                                                                                                                              |     |                                                                                                                      |                                                                                                                                  |                                                                                                                                                                                                                                                                                                                                                                                                                                                                         |
| 43 |            |                              |                                        |                                                                                                                              |     |                                                                                                                      |                                                                                                                                  |                                                                                                                                                                                                                                                                                                                                                                                                                                                                         |
| 44 | SMS vs. PC | Norton 2014                  | RCT                                    | HIV+, 17+ yrs, USA.<br>n=25(Int) n=27(Ctrl)                                                                                  | HIV | SMS appointment<br>reminder vs. message to<br>home phone                                                             | ATT FU<br>appointment:<br>Attendance rate.                                                                                       | No difference (72% vs. 81%, p=0.42) but patients already had high<br>attendance rate / No impact.                                                                                                                                                                                                                                                                                                                                                                       |
| 45 |            |                              |                                        |                                                                                                                              |     |                                                                                                                      |                                                                                                                                  |                                                                                                                                                                                                                                                                                                                                                                                                                                                                         |
| 46 |            |                              |                                        |                                                                                                                              |     |                                                                                                                      |                                                                                                                                  |                                                                                                                                                                                                                                                                                                                                                                                                                                                                         |

|    |          |                |                                        |                                                                                                                                                       |          |                                                                                  |                                                                                                             |                                                                                                                                                                                                                                                                                                                                                                                                                                                 |
|----|----------|----------------|----------------------------------------|-------------------------------------------------------------------------------------------------------------------------------------------------------|----------|----------------------------------------------------------------------------------|-------------------------------------------------------------------------------------------------------------|-------------------------------------------------------------------------------------------------------------------------------------------------------------------------------------------------------------------------------------------------------------------------------------------------------------------------------------------------------------------------------------------------------------------------------------------------|
| 1  | SMS      | Nyatsanza 2016 | Quasi-experimental:<br>HxCtrl.         | MSM & CSW at high-<br>risk of STI, GBR<br>n=266 (Int)<br>n=273 (Ctrl)                                                                                 | HIV/STI  | Personalised SMS<br>reminders for<br>reattendance.                               | ATT testing:<br>Attendance rate.                                                                            | Significantly higher reattendance rate at 6M (56% vs. 33%, p<0.001)/<br>Effective.                                                                                                                                                                                                                                                                                                                                                              |
| 2  |          |                |                                        |                                                                                                                                                       |          |                                                                                  |                                                                                                             |                                                                                                                                                                                                                                                                                                                                                                                                                                                 |
| 3  |          |                |                                        |                                                                                                                                                       |          |                                                                                  |                                                                                                             |                                                                                                                                                                                                                                                                                                                                                                                                                                                 |
| 4  | SMS      | Odeny 2012     | RCT                                    | Males circumcised at<br>clinic 18+ yrs, KEN.<br>n=600(Int)<br>n=600(Ctrl)                                                                             | HIV      | Daily SMS for 1W.                                                                | ATT FU<br>appointment:<br>Attendance rate.<br>PB: Self-report.                                              | Improved attendance within 3 days of post-operative clinic appointment:<br>65.4% vs.59.7% (RR=1.09(1.00–1.20); p=0.04) / Effective.<br>Abstinence of sexual activity before FU: 28.3% vs. 25.2% (RR=1.13(0.91-<br>1.38), p=0.3) / No impact.                                                                                                                                                                                                    |
| 5  |          |                |                                        |                                                                                                                                                       |          |                                                                                  |                                                                                                             |                                                                                                                                                                                                                                                                                                                                                                                                                                                 |
| 6  |          |                |                                        |                                                                                                                                                       |          |                                                                                  |                                                                                                             |                                                                                                                                                                                                                                                                                                                                                                                                                                                 |
| 7  |          |                |                                        |                                                                                                                                                       |          |                                                                                  |                                                                                                             |                                                                                                                                                                                                                                                                                                                                                                                                                                                 |
| 8  | SMS      | Rand 2015      | RCT                                    | 11-16 yrs at clinic,<br>USA. n=1893(Int)<br>n=1919(Ctrl)                                                                                              | HPV      | SMS appointment<br>reminders.                                                    | ATT vaccination:<br>Attendance rate.                                                                        | Higher HPV1 vaccination rate (16% vs. 13%; HR= 1.3(1.0-1.6); p=0.04) /<br>Effective.                                                                                                                                                                                                                                                                                                                                                            |
| 9  |          |                |                                        |                                                                                                                                                       |          |                                                                                  |                                                                                                             |                                                                                                                                                                                                                                                                                                                                                                                                                                                 |
| 10 |          |                |                                        |                                                                                                                                                       |          |                                                                                  |                                                                                                             |                                                                                                                                                                                                                                                                                                                                                                                                                                                 |
| 11 | SMS/PC   | Rand 2016      | RCT.                                   | Clinic attendees<br>Parents of youth 11-17<br>yrs who received 1st<br>HPV vaccine, USA.<br>n=191 (SMS)<br>n=200 (Ctrl);<br>n=178 (PC)<br>n=180 (Ctrl) | HPV      | SMS appointment<br>reminders to receive 3<br>doses of HPV vaccine<br>over 2 yrs. | ATT vaccination:<br>Attendance rate.<br>TAT: Time from<br>enroll to completion<br>of 3 vaccines.            | SMS: Significant difference in vaccination rates compared to control (49%<br>vs 30%, p=0.001)/ Effective.<br>PC: No difference in vaccination rates compared to control (48% vs 40%,<br>p=0.34)/ No impact.<br>SMS: Significant difference in time taken to complete 3 HPV doses (71 days<br>earlier than control, p<0.001)/ Effective.<br>PC: No difference in time taken to complete 3 HPV doses compared to<br>control ( p=0.08)/ No impact. |
| 12 |          |                |                                        |                                                                                                                                                       |          |                                                                                  |                                                                                                             |                                                                                                                                                                                                                                                                                                                                                                                                                                                 |
| 13 |          |                |                                        |                                                                                                                                                       |          |                                                                                  |                                                                                                             |                                                                                                                                                                                                                                                                                                                                                                                                                                                 |
| 14 |          |                |                                        |                                                                                                                                                       |          |                                                                                  |                                                                                                             |                                                                                                                                                                                                                                                                                                                                                                                                                                                 |
| 15 |          |                |                                        |                                                                                                                                                       |          |                                                                                  |                                                                                                             |                                                                                                                                                                                                                                                                                                                                                                                                                                                 |
| 16 |          |                |                                        |                                                                                                                                                       |          |                                                                                  |                                                                                                             |                                                                                                                                                                                                                                                                                                                                                                                                                                                 |
| 17 |          |                |                                        |                                                                                                                                                       |          |                                                                                  |                                                                                                             |                                                                                                                                                                                                                                                                                                                                                                                                                                                 |
| 18 |          |                |                                        |                                                                                                                                                       |          |                                                                                  |                                                                                                             |                                                                                                                                                                                                                                                                                                                                                                                                                                                 |
| 19 |          |                |                                        |                                                                                                                                                       |          |                                                                                  |                                                                                                             |                                                                                                                                                                                                                                                                                                                                                                                                                                                 |
| 20 | SMS + PC | Schwartz 2015  | Quasi-experimental:<br>HxCtrl.         | HIV+ pregnant<br>women on ART, ZAF.<br>n=50                                                                                                           | HIV      | SMS messages and PCs<br>from a case manager<br>(CM) through 6W<br>postpartum.    | ATT testing:<br>Attendance rate.<br>Acceptability: Self-<br>report.<br>Feasibility:<br>Completion rate.     | More infant testing (90.0% vs. 63.3% at 10W; p<0.01) / Effective.<br>Helpful to have CM support during pregnancy and postpartum (98%) /<br>Highly acceptable.<br>96% completed postpartum questionnaire / Highly feasible.                                                                                                                                                                                                                      |
| 21 |          |                |                                        |                                                                                                                                                       |          |                                                                                  |                                                                                                             |                                                                                                                                                                                                                                                                                                                                                                                                                                                 |
| 22 |          |                |                                        |                                                                                                                                                       |          |                                                                                  |                                                                                                             |                                                                                                                                                                                                                                                                                                                                                                                                                                                 |
| 23 |          |                |                                        |                                                                                                                                                       |          |                                                                                  |                                                                                                             |                                                                                                                                                                                                                                                                                                                                                                                                                                                 |
| 24 |          |                |                                        |                                                                                                                                                       |          |                                                                                  |                                                                                                             |                                                                                                                                                                                                                                                                                                                                                                                                                                                 |
| 25 |          |                |                                        |                                                                                                                                                       |          |                                                                                  |                                                                                                             |                                                                                                                                                                                                                                                                                                                                                                                                                                                 |
| 26 | SMS + PC | Segaren 2012   | UnCtrlled trial.                       | Mothers of HIV+<br>infants, HTI. n=108                                                                                                                | HIV      | Cell phones + regular PC<br>for monitoring of mother<br>& child.                 | ATT treatment:<br>Attendance rate.<br>Acceptability: Self-<br>report.                                       | All 76 w/ active phones were adherent to treatment (attended 6/6 monthly<br>hospital appointments).<br>70% phones active after Int.; good for med reminders (63%) / Moderately<br>acceptable.                                                                                                                                                                                                                                                   |
| 27 |          |                |                                        |                                                                                                                                                       |          |                                                                                  |                                                                                                             |                                                                                                                                                                                                                                                                                                                                                                                                                                                 |
| 28 |          |                |                                        |                                                                                                                                                       |          |                                                                                  |                                                                                                             |                                                                                                                                                                                                                                                                                                                                                                                                                                                 |
| 29 |          |                |                                        |                                                                                                                                                       |          |                                                                                  |                                                                                                             |                                                                                                                                                                                                                                                                                                                                                                                                                                                 |
| 30 | SMS + PC | Smillie 2014   | UnCtrlled trial.                       | HIV+ in clinic 14+<br>yrs, CAN. n=20                                                                                                                  | HIV      | Weekly PC or SMS for<br>6M.                                                      | ATT FU<br>appointment: Self-<br>report.<br>Acceptability: Self-<br>report.<br>Feasibility: Self-<br>report. | 65% said SMS had no effect on attendance.<br>Beneficial for appointment scheduling (80%) & reminder (75%). All would<br>recommend to a friend / Highly acceptable.<br>75% had no difficulty in receiving and responding to SMS / Highly feasible.                                                                                                                                                                                               |
| 31 |          |                |                                        |                                                                                                                                                       |          |                                                                                  |                                                                                                             |                                                                                                                                                                                                                                                                                                                                                                                                                                                 |
| 32 |          |                |                                        |                                                                                                                                                       |          |                                                                                  |                                                                                                             |                                                                                                                                                                                                                                                                                                                                                                                                                                                 |
| 33 |          |                |                                        |                                                                                                                                                       |          |                                                                                  |                                                                                                             |                                                                                                                                                                                                                                                                                                                                                                                                                                                 |
| 34 |          |                |                                        |                                                                                                                                                       |          |                                                                                  |                                                                                                             |                                                                                                                                                                                                                                                                                                                                                                                                                                                 |
| 35 |          |                |                                        |                                                                                                                                                       |          |                                                                                  |                                                                                                             |                                                                                                                                                                                                                                                                                                                                                                                                                                                 |
| 36 |          |                |                                        |                                                                                                                                                       |          |                                                                                  |                                                                                                             |                                                                                                                                                                                                                                                                                                                                                                                                                                                 |
| 37 | SMS      | Tolly 2012     | RCT                                    | Randomly sampled<br>adults (existing<br>database), ZAF.<br>n=438(in each of 4<br>Int.)<br>n=801(Ctrl)                                                 | HIV      | 3 or 10 motivational or<br>informational SMS.                                    | ATT testing: Self-<br>report.<br>Feasibility: Self-<br>report.                                              | Improved attendance in group receiving 10 motivational SMS at 3W: (69%<br>vs. 57%; OR=1.7(1.10–2.390), p=0.0036) / Effective.<br>SMS motivated HIV counseling and testing uptake in 89% / Highly feasible.                                                                                                                                                                                                                                      |
| 38 |          |                |                                        |                                                                                                                                                       |          |                                                                                  |                                                                                                             |                                                                                                                                                                                                                                                                                                                                                                                                                                                 |
| 39 |          |                |                                        |                                                                                                                                                       |          |                                                                                  |                                                                                                             |                                                                                                                                                                                                                                                                                                                                                                                                                                                 |
| 40 |          |                |                                        |                                                                                                                                                       |          |                                                                                  |                                                                                                             |                                                                                                                                                                                                                                                                                                                                                                                                                                                 |
| 41 |          |                |                                        |                                                                                                                                                       |          |                                                                                  |                                                                                                             |                                                                                                                                                                                                                                                                                                                                                                                                                                                 |
| 42 |          |                |                                        |                                                                                                                                                       |          |                                                                                  |                                                                                                             |                                                                                                                                                                                                                                                                                                                                                                                                                                                 |
| 43 | SMS      | Vilella 2004   | Quasi-experimental:<br>Conc. + HxCtrl. | 18+ yrs at travel clinic,<br>ESP. n=738(Int)<br>n=1610(Conc. Ctrl)<br>n=2247(HxCtrl)                                                                  | HAV/ HBV | SMS reminders for<br>vaccination<br>appointments.                                | ATT vaccination:<br>Attendance rate.                                                                        | Improved adherence for 3rd HepA+B dose. (47.1% vs. 26.9%,<br>RR=1.75(1.41–2.17) in Conc. Ctrl and 23.6%(20.1–27.4), RR=2.00(1.63–<br>2.45) in HxCtrl) / Effective.                                                                                                                                                                                                                                                                              |
| 44 |          |                |                                        |                                                                                                                                                       |          |                                                                                  |                                                                                                             |                                                                                                                                                                                                                                                                                                                                                                                                                                                 |
| 45 |          |                |                                        |                                                                                                                                                       |          |                                                                                  |                                                                                                             |                                                                                                                                                                                                                                                                                                                                                                                                                                                 |
| 46 |          |                |                                        |                                                                                                                                                       |          |                                                                                  |                                                                                                             |                                                                                                                                                                                                                                                                                                                                                                                                                                                 |
| 47 |          |                |                                        |                                                                                                                                                       |          |                                                                                  |                                                                                                             |                                                                                                                                                                                                                                                                                                                                                                                                                                                 |
| 48 |          |                |                                        |                                                                                                                                                       |          |                                                                                  |                                                                                                             |                                                                                                                                                                                                                                                                                                                                                                                                                                                 |
| 49 |          |                |                                        |                                                                                                                                                       |          |                                                                                  |                                                                                                             |                                                                                                                                                                                                                                                                                                                                                                                                                                                 |

|    |                      |                     |                                  |                                                           |     |                                                                        |                                          |                                                                                                                                                                                                                   |
|----|----------------------|---------------------|----------------------------------|-----------------------------------------------------------|-----|------------------------------------------------------------------------|------------------------------------------|-------------------------------------------------------------------------------------------------------------------------------------------------------------------------------------------------------------------|
| 1  | SMS                  | Ammassari 2010      | UnCtrlled trial.                 | HIV+, ITA. n=71                                           | HIV | SMS reminders.                                                         | ART in NAPs: Self-report.                | Increased adherence over 9M. (93.2% vs.79.6%, p=0.003) / Effective.                                                                                                                                               |
| 2  |                      |                     |                                  |                                                           |     |                                                                        |                                          |                                                                                                                                                                                                                   |
| 3  | SMS                  | Ammassari 2011      | UnCtrlled trial.                 | HIV+, 18+ yrs, ITA. n=145                                 | HIV | SMS reminders.                                                         | ART in NAPs: Self-report.                | Increased adherence at 9M (94.9% vs.78.8%, p<0.001) / Effective.                                                                                                                                                  |
| 4  |                      |                     |                                  |                                                           |     |                                                                        |                                          |                                                                                                                                                                                                                   |
| 5  |                      |                     |                                  |                                                           |     |                                                                        | ART in NAPs: VL.                         | More w/ undetectable VL at 9M (76.2% vs. 42.3%, p<0.001) / Effective.                                                                                                                                             |
| 6  |                      |                     |                                  |                                                           |     |                                                                        | Acceptability: Self-report.              | >90% reporting SMS helpful / Highly acceptable.                                                                                                                                                                   |
| 7  |                      |                     |                                  |                                                           |     |                                                                        |                                          |                                                                                                                                                                                                                   |
| 8  | PC + cash incentives | Belzer 2014         | RCT                              | HIV+ 12-29 yrs, USA. n=19(Int) n=18(Ctrl)                 | HIV | Daily PC reminders and referrals if necessary+ free phone & plan.      | ART in NAPs: Self-report.                | Increased adherence for 1M & 3 M (OR=3.09(1.20-7.98); OR=2.85(1.02-7.97)) / Effective.                                                                                                                            |
| 9  |                      |                     |                                  |                                                           |     |                                                                        | ART in NAPs: VL.                         | Lower VL at wk 24 and 48 (2.82 vs. 4.52, p=0.002; 3.23 vs. 4.23, p=0.043) / Effective.                                                                                                                            |
| 10 |                      |                     |                                  |                                                           |     |                                                                        |                                          |                                                                                                                                                                                                                   |
| 11 |                      |                     |                                  |                                                           |     |                                                                        |                                          |                                                                                                                                                                                                                   |
| 12 |                      |                     |                                  |                                                           |     |                                                                        |                                          |                                                                                                                                                                                                                   |
| 13 | SMS                  | Cantudo-Cuenca 2016 | Retrospective quasi-exprimental. | HIV + on ART, ESP n=120 (Int&Ctrl)                        | HIV | SMS on ART adherence.                                                  | ART in PVLA: Pharmacy refills.           | Statistically sign relationship bt no SMS and ART adherence(OR= 0.35 (0.14-0.8), p=0.025) [multivariate analysis]/ Effective.                                                                                     |
| 14 |                      |                     |                                  |                                                           |     |                                                                        |                                          |                                                                                                                                                                                                                   |
| 15 |                      |                     |                                  |                                                           |     |                                                                        |                                          |                                                                                                                                                                                                                   |
| 16 | SMS                  | da Costa 2012       | RCT                              | HIV+ women, BRA. n=8(Int) n=13(Ctrl)                      | HIV | Daily SMS reminders.                                                   | ART in APs: Pill count.                  | Increased adherence over 4M (50% vs. 38.5%; p=0.604) / No impact.                                                                                                                                                 |
| 17 |                      |                     |                                  |                                                           |     |                                                                        | ART in APs: MEM.                         | Increased adherence over 4M (75% vs. 46%; p=0.195) / No impact.                                                                                                                                                   |
| 18 |                      |                     |                                  |                                                           |     |                                                                        | ART in APs: Self-report.                 | Increased adherence (100% vs. 84.6% in Ctrl; p=0.244) / No impact.                                                                                                                                                |
| 19 |                      |                     |                                  |                                                           |     |                                                                        | Acceptability: Self-report.              | 82% believed SMS were helpful, 77% wanted to keep receiving SMS / Highly acceptable.                                                                                                                              |
| 20 |                      |                     |                                  |                                                           |     |                                                                        |                                          |                                                                                                                                                                                                                   |
| 21 |                      |                     |                                  |                                                           |     |                                                                        |                                          |                                                                                                                                                                                                                   |
| 22 |                      |                     |                                  |                                                           |     |                                                                        |                                          |                                                                                                                                                                                                                   |
| 23 |                      |                     |                                  |                                                           |     |                                                                        |                                          |                                                                                                                                                                                                                   |
| 24 | SMS                  | Downshen 2011       | UnCtrlled trial.                 | HIV+ 14-29 yrs, AUS. n=25                                 | HIV | Daily SMS ART reminder + FU SMS 1hr later.                             | ART in NAPs: Self-report.                | Increased adherence (Baseline Mean=74.7; 12W Mean=93.3; 24WMean=93.1; p<0.001) / Effective.                                                                                                                       |
| 25 |                      |                     |                                  |                                                           |     |                                                                        | ART in NAPs: VL + CD4 count.             | Insignificant change in CD4 cell count & VL (mean VL= 2750, CD4= 502 to VL= 29, CD4= 545 at 24W, p=0.12) / No impact.                                                                                             |
| 26 |                      |                     |                                  |                                                           |     |                                                                        | Acceptability: Self-report.              | 81% want SMS after study end. Helped decrease missed doses in 95% / Highly acceptable.                                                                                                                            |
| 27 |                      |                     |                                  |                                                           |     |                                                                        |                                          |                                                                                                                                                                                                                   |
| 28 |                      |                     |                                  |                                                           |     |                                                                        |                                          |                                                                                                                                                                                                                   |
| 29 |                      |                     |                                  |                                                           |     |                                                                        |                                          |                                                                                                                                                                                                                   |
| 30 | SMS                  | Downshen 2011       | UnCtrlled trial.                 | HIV+ 14-29 yrs, AUS. n=25                                 | HIV | Daily SMS ART reminder + FU SMS 1hr later.                             | ART in NAPs: Self-report.                | Decreased adherence (58.3% for 0-12W vs. 55.2% for 13-24W, p=0.53) / No impact.                                                                                                                                   |
| 31 |                      |                     |                                  |                                                           |     |                                                                        | Feasibility: Completion & response rate. | 84% completed all study visits. 61.4% response rate / Highly feasible.                                                                                                                                            |
| 32 |                      |                     |                                  |                                                           |     |                                                                        |                                          |                                                                                                                                                                                                                   |
| 33 |                      |                     |                                  |                                                           |     |                                                                        |                                          |                                                                                                                                                                                                                   |
| 34 |                      |                     |                                  |                                                           |     |                                                                        |                                          |                                                                                                                                                                                                                   |
| 35 |                      |                     |                                  |                                                           |     |                                                                        |                                          |                                                                                                                                                                                                                   |
| 36 | SMS + cash incentive | Garofalo 2016       | RCT                              | 16-29yrs, HIV+ on ART for ≥1M , USA. n=51(Int) n=54(Ctrl) | HIV | Daily personalised SMS over 6M to remind participants take medications | ART in NAPs: Self-report.                | Significant difference in adherence compared to control at 3M OR=2.57 (1.01-6.54). Not significant at 6M OR=1.68 (0.69-4.09). Significant difference from baseline to 6M OR=2.12 (95% CI 1.01-4.45). / Effective. |
| 37 |                      |                     |                                  |                                                           |     |                                                                        | ART in NAPs: VL.                         | No difference in log viral load or viral suppression compared to control at 3 and 6M / No impact.                                                                                                                 |
| 38 |                      |                     |                                  |                                                           |     |                                                                        | Acceptability: Self-report.              | 100% would recommend intervention to those in need, 81 % wanted to continue getting the text messages after conclusion of the study, 95 % satisfied with the intervention overall / Highly acceptable             |
| 39 |                      |                     |                                  |                                                           |     |                                                                        | Feasibility: Response rate.              | 58% average response rate to SMS / Moderately feasible.                                                                                                                                                           |
| 40 |                      |                     |                                  |                                                           |     |                                                                        |                                          |                                                                                                                                                                                                                   |
| 41 |                      |                     |                                  |                                                           |     |                                                                        |                                          |                                                                                                                                                                                                                   |
| 42 |                      |                     |                                  |                                                           |     |                                                                        |                                          |                                                                                                                                                                                                                   |
| 43 |                      |                     |                                  |                                                           |     |                                                                        |                                          |                                                                                                                                                                                                                   |
| 44 |                      |                     |                                  |                                                           |     |                                                                        |                                          |                                                                                                                                                                                                                   |
| 45 |                      |                     |                                  |                                                           |     |                                                                        |                                          |                                                                                                                                                                                                                   |
| 46 |                      |                     |                                  |                                                           |     |                                                                        |                                          |                                                                                                                                                                                                                   |

|    |                            |                |      |                                                                                        |     |                                                                                                                                                                              |                                                                 |                                                                                                                                                                                                                                                                                           |
|----|----------------------------|----------------|------|----------------------------------------------------------------------------------------|-----|------------------------------------------------------------------------------------------------------------------------------------------------------------------------------|-----------------------------------------------------------------|-------------------------------------------------------------------------------------------------------------------------------------------------------------------------------------------------------------------------------------------------------------------------------------------|
| 1  | SMS +PC                    | Haberer 2016   | RCT  | ≥18yrs, HIV+ on ART, UGA.<br>n=21(Scheduled SMS)<br>n=20 (Triggered SMS)<br>n=21(Ctrl) | HIV | Scheduled SMS: 1M daily SMS, 2M weekly SMS, 6M SMS sent to patient and support if needed. Triggered SMS; SMS sent to patient and support if no signal received from monitor. | ART: MEM                                                        | Significant difference in scheduled SMS intervention compared to control (11.1% increase in adherence, 48-h and more than 96-h lapses were less frequent (IRR=0.6, p value=0.02 and IRR 0.3, P<0.001, respectively).<br>Similar adherence in triggered SMS vs control group. / Effective. |
| 2  |                            |                |      |                                                                                        |     |                                                                                                                                                                              | ART: VL                                                         | No significant differences in HIV RNA suppression among study arms (p value = 0.14). 47/62 participants virally suppressed at 3 and 9M / No impact.                                                                                                                                       |
| 3  |                            |                |      |                                                                                        |     |                                                                                                                                                                              |                                                                 |                                                                                                                                                                                                                                                                                           |
| 4  |                            |                |      |                                                                                        |     |                                                                                                                                                                              |                                                                 |                                                                                                                                                                                                                                                                                           |
| 5  |                            |                |      |                                                                                        |     |                                                                                                                                                                              |                                                                 |                                                                                                                                                                                                                                                                                           |
| 6  |                            |                |      |                                                                                        |     |                                                                                                                                                                              |                                                                 |                                                                                                                                                                                                                                                                                           |
| 7  | SMS                        | Hardy 2011     | RCT  | HIV+ 18+ yrs, USA.<br>n=12(SMS)<br>n=14(Beeper)                                        | HIV | SMS vs. beeper reminders.                                                                                                                                                    | ART in APs:<br>Composite score (MEM+ pill count + self-report). | Higher adherence at 6W. (MD=27.1(7.6-46.6), p=0.009) / Effective.                                                                                                                                                                                                                         |
| 8  |                            |                |      |                                                                                        |     |                                                                                                                                                                              | ART in APs: MEM.                                                | Increased adherence. (MD=33.4(14.1-52.6), p = 0.002) / Effective.                                                                                                                                                                                                                         |
| 9  |                            |                |      |                                                                                        |     |                                                                                                                                                                              | ART in APs: Pill count.                                         | No difference. (MD=13.7(-6.7-34.1), p = 0.153) / No impact.                                                                                                                                                                                                                               |
| 10 |                            |                |      |                                                                                        |     |                                                                                                                                                                              | ART in APs: Self-report.                                        | No difference. (MD=20.2 (-1.8-42.1), p = 0.069) / No impact.                                                                                                                                                                                                                              |
| 11 |                            |                |      |                                                                                        |     |                                                                                                                                                                              |                                                                 |                                                                                                                                                                                                                                                                                           |
| 12 | SMS                        | Jeffries 2016  | RCT  | 15-24yrs, HIV+, USA.<br>n=91(Int) n=45(Ctrl)                                           | HIV | UCARE4LIFE daily mobile text messaging intervention over 3M to improve HIV care among youth                                                                                  | ART: VL                                                         | Significant difference in ART adherence in intervention vs control among non-adherent/new to ART at baseline (6M p=0.03). / Effective.<br>No sig difference in those on ART at baseline (6M p=0.119) /No impact.                                                                          |
| 13 |                            |                |      |                                                                                        |     |                                                                                                                                                                              | Acceptability: Self-report.                                     | Mean score = 8.44 (SD=2.45) on 10 point Likert Scale for appointment reminder SMS./ Highly acceptable                                                                                                                                                                                     |
| 14 |                            |                |      |                                                                                        |     |                                                                                                                                                                              |                                                                 |                                                                                                                                                                                                                                                                                           |
| 15 |                            |                |      |                                                                                        |     |                                                                                                                                                                              |                                                                 |                                                                                                                                                                                                                                                                                           |
| 16 | PC                         | Kalichman 2011 | RCT  | HIV+ 18+ yrs, USA.<br>n=21(Int) n=19(Ctrl)                                             | HIV | PC counselling.                                                                                                                                                              | ART in NAPs: Pill count.                                        | No difference at 4M (F(1,36)=3.32, p<0.07) / No impact.                                                                                                                                                                                                                                   |
| 17 |                            |                |      |                                                                                        |     |                                                                                                                                                                              | Feasibility: Completion rate.                                   | 99% completion rate / Highly feasible.                                                                                                                                                                                                                                                    |
| 18 |                            |                |      |                                                                                        |     |                                                                                                                                                                              |                                                                 |                                                                                                                                                                                                                                                                                           |
| 19 | SMS                        | Kassaye 2016   | RCT. | HIV+ pregnant women, KEN<br>n=280 (Int)<br>n=270 (Ctrl)                                | HIV | 3 to 6 weekly SMS (ART reminders, motivational, PMTCT, child health & nutrition).                                                                                            | ART in TNPs: Self-report.                                       | Nonsignificant difference in adherence to ART at 34-36W gestation between the 2 groups (97.3% vs 99.6%, aRR= 1.25 (0.43-3.60)/No impact.<br>Nonsignificant difference in adherence to ART at delivery between the 2 groups (94.7% vs 100%, aRR=1.01 (0.88-1.16))./ No impact.             |
| 20 |                            |                |      |                                                                                        |     |                                                                                                                                                                              |                                                                 |                                                                                                                                                                                                                                                                                           |
| 21 |                            |                |      |                                                                                        |     |                                                                                                                                                                              |                                                                 |                                                                                                                                                                                                                                                                                           |
| 22 | PC                         | Kebaya 2014    | RCT  | HIV+ mothers in PMTCT, KEN.<br>n=75(Int) n=75(Ctrl)                                    | HIV | Bi-weekly PC.                                                                                                                                                                | ART in TNPs: Self-report.                                       | Increased adherence (90.7% vs. 72%, p=0.005) / Effective.                                                                                                                                                                                                                                 |
| 23 |                            |                |      |                                                                                        |     |                                                                                                                                                                              | Feasibility: Retention rate.                                    | More likely to remain in treatment at 10W (69.3% vs 37.3%, p<0.001) / Moderately feasible.                                                                                                                                                                                                |
| 24 |                            |                |      |                                                                                        |     |                                                                                                                                                                              |                                                                 |                                                                                                                                                                                                                                                                                           |
| 25 | SMS                        | Lester 2010    | RCT  | HIV+ 18+ yrs, KEN.<br>n=273(Int)<br>n=265(Ctrl)                                        | HIV | Weekly SMS.                                                                                                                                                                  | ART in TNPs: Self-report.                                       | Improved adherence at 6M and 12M: RR=0.81(0.69-0.94) p=0.006 / Effective.                                                                                                                                                                                                                 |
| 26 |                            |                |      |                                                                                        |     |                                                                                                                                                                              | ART in TNPs: VL.                                                | Lower virological failure (RR=0.84(0.71-0.99) p=0.04) and improved viral suppression (OR=0.71(0.5-1.01) p=0.058) / Effective.                                                                                                                                                             |
| 27 |                            |                |      |                                                                                        |     |                                                                                                                                                                              |                                                                 |                                                                                                                                                                                                                                                                                           |
| 28 | SMS + PC + cash incentives | Maduka 2013    | RCT  | HIV+ at hospital 20+ yrs, NGA. n=52(Int)<br>n=52(Ctrl)                                 | HIV | 2 monthly counselling PCs + 2 weekly SMS+ cash incentives                                                                                                                    | ART in NAPs: Self-report.                                       | Increased adherence (76.9% vs. 55.8%, X2=5.211,p=0.022; RR=0.725(0.55-0.96)) / Effective.                                                                                                                                                                                                 |
| 29 |                            |                |      |                                                                                        |     |                                                                                                                                                                              | ART in NAPs: CD4 count.                                         | Improved CD4+ count (193-->575 cells/mL vs. 131-->361.5 cells/mL; p=0.007) / Effective.                                                                                                                                                                                                   |
| 30 |                            |                |      |                                                                                        |     |                                                                                                                                                                              |                                                                 |                                                                                                                                                                                                                                                                                           |
| 31 | SMS + PC                   | Mbuagbaw 2012  | RCT  | HIV+ 21+ yrs, CMR.<br>n=101(Int) n=99(Ctrl)                                            | HIV | Weekly motivational SMS. Phone number to call for support.                                                                                                                   | ART in PVLA: Self-report.                                       | No difference. (RR=1.06(0.89-1.29); p=0.542) / No impact.                                                                                                                                                                                                                                 |
| 32 |                            |                |      |                                                                                        |     |                                                                                                                                                                              | ART in PVLA: Pharmacy Refills.                                  | No difference at 6 months (MD=0.1(-0.23-0.43); p=0.617) / No impact.                                                                                                                                                                                                                      |
| 33 |                            |                |      |                                                                                        |     |                                                                                                                                                                              | Acceptability: Self-report.                                     | 91.1% believed SMS reminders helped; 65% were satisfied; 81.2% would recommend to a friend / Highly acceptable.                                                                                                                                                                           |
| 34 |                            |                |      |                                                                                        |     |                                                                                                                                                                              |                                                                 |                                                                                                                                                                                                                                                                                           |
| 35 |                            |                |      |                                                                                        |     |                                                                                                                                                                              |                                                                 |                                                                                                                                                                                                                                                                                           |
| 36 |                            |                |      |                                                                                        |     |                                                                                                                                                                              |                                                                 |                                                                                                                                                                                                                                                                                           |
| 37 |                            |                |      |                                                                                        |     |                                                                                                                                                                              |                                                                 |                                                                                                                                                                                                                                                                                           |
| 38 |                            |                |      |                                                                                        |     |                                                                                                                                                                              |                                                                 |                                                                                                                                                                                                                                                                                           |
| 39 |                            |                |      |                                                                                        |     |                                                                                                                                                                              |                                                                 |                                                                                                                                                                                                                                                                                           |
| 40 |                            |                |      |                                                                                        |     |                                                                                                                                                                              |                                                                 |                                                                                                                                                                                                                                                                                           |
| 41 |                            |                |      |                                                                                        |     |                                                                                                                                                                              |                                                                 |                                                                                                                                                                                                                                                                                           |
| 42 |                            |                |      |                                                                                        |     |                                                                                                                                                                              |                                                                 |                                                                                                                                                                                                                                                                                           |
| 43 |                            |                |      |                                                                                        |     |                                                                                                                                                                              |                                                                 |                                                                                                                                                                                                                                                                                           |
| 44 |                            |                |      |                                                                                        |     |                                                                                                                                                                              |                                                                 |                                                                                                                                                                                                                                                                                           |
| 45 |                            |                |      |                                                                                        |     |                                                                                                                                                                              |                                                                 |                                                                                                                                                                                                                                                                                           |
| 46 |                            |                |      |                                                                                        |     |                                                                                                                                                                              |                                                                 |                                                                                                                                                                                                                                                                                           |

|    |                      |                      |                             |                                                                                  |     |                                                                                                                       |                                                                           |                                                                                                                                                                                                                                                                                |
|----|----------------------|----------------------|-----------------------------|----------------------------------------------------------------------------------|-----|-----------------------------------------------------------------------------------------------------------------------|---------------------------------------------------------------------------|--------------------------------------------------------------------------------------------------------------------------------------------------------------------------------------------------------------------------------------------------------------------------------|
| 1  | SMS                  | Moore 2015           | RCT                         | HIV+ bipolar 18+ yrs, USA.<br>n=25(Int) n=25(Ctrl)                               | HIV | SMS reminders.                                                                                                        | ART in PVLA: MEM.                                                         | No difference. (86.2% (SD= 12.7) vs. 84.8% (SD= 18.1); p=0.95; d=0.01) / No impact.                                                                                                                                                                                            |
| 2  |                      |                      |                             |                                                                                  |     |                                                                                                                       |                                                                           |                                                                                                                                                                                                                                                                                |
| 3  | SMS                  | Nsagha 2016          | RCT.                        | HIV+ on ART, 18+yrs, CMR<br>n=45 (Int)<br>n=45 (Ctrl)                            | HIV | 4 weekly educative SMS over 1M.                                                                                       | ART in PVLA: Self-report.<br>Acceptability: Self-report.                  | Nonsignificant difference in adherence to ART at 1M between the 2 groups (64.4% vs 44.2%, p=0.056)/ No impact.<br>57.8% wished the SMS to continue/ Moderately acceptable                                                                                                      |
| 4  |                      |                      |                             |                                                                                  |     |                                                                                                                       |                                                                           |                                                                                                                                                                                                                                                                                |
| 5  |                      |                      |                             |                                                                                  |     |                                                                                                                       |                                                                           |                                                                                                                                                                                                                                                                                |
| 6  |                      |                      |                             |                                                                                  |     |                                                                                                                       |                                                                           |                                                                                                                                                                                                                                                                                |
| 7  | SMS                  | Pop-Eleches 2010     | RCT                         | HIV+ 18+ yrs, rural KEN.<br>n=142(Daily SMS)<br>n=147(Weekly SMS)<br>n=139(Ctrl) | HIV | Daily or weekly SMS.                                                                                                  | ART in PVLA: MEM.<br>ART in PVLA: MEM.                                    | Increased adherence in weekly SMS group over 48W (53% vs. 40% p=0.03) / Effective.<br>No difference between daily SMS group and Ctrl (41% vs. 40% p=0.92) / No impact.                                                                                                         |
| 8  |                      |                      |                             |                                                                                  |     |                                                                                                                       |                                                                           |                                                                                                                                                                                                                                                                                |
| 9  |                      |                      |                             |                                                                                  |     |                                                                                                                       |                                                                           |                                                                                                                                                                                                                                                                                |
| 10 |                      |                      |                             |                                                                                  |     |                                                                                                                       |                                                                           |                                                                                                                                                                                                                                                                                |
| 11 |                      |                      |                             |                                                                                  |     |                                                                                                                       |                                                                           |                                                                                                                                                                                                                                                                                |
| 12 | SMS + cash incentive | Rana 2016            | UnCtrlled trial.            | HIV+, 18+yrs, USA.<br>n=32                                                       | HIV | Bi-directional weekly SMS appointment reminders, daily ART reminder & supportive messages.                            | ART in PVLA: Undetectable VL<br>ATT treatment: Attendance rate.           | Significant increase in the number of participants with undetectable VL at 6M (25 vs. 18, p=0.002)/ Effective.<br>20/32 completed all visits within 6M study period.                                                                                                           |
| 13 |                      |                      |                             |                                                                                  |     |                                                                                                                       |                                                                           |                                                                                                                                                                                                                                                                                |
| 14 |                      |                      |                             |                                                                                  |     |                                                                                                                       |                                                                           |                                                                                                                                                                                                                                                                                |
| 15 |                      |                      |                             |                                                                                  |     |                                                                                                                       |                                                                           |                                                                                                                                                                                                                                                                                |
| 16 |                      |                      |                             |                                                                                  |     |                                                                                                                       |                                                                           |                                                                                                                                                                                                                                                                                |
| 17 | SMS                  | Sabin 2015           | RCT                         | HIV+ 18+ yrs, in CHN. n=63(Int)<br>n=56(Ctrl)                                    | HIV | SMS reminders via MEM + adherence counselling.                                                                        | ART in PVLA: MEM.<br>ART in PVLA: VL.<br>ART in PVLA: CD4 count.          | Increased adherence over 6M (82% vs. 51.8%; RR=1.59(1.21- 2.10), p<0.001) / Effective.<br>No difference in undetectable VL (93.6% vs. 98.2%, p=0.218) / No impact.<br>Higher mean change in CD4 count (52 vs 28 cell/ $\mu$ L, p=0.297) / No impact.                           |
| 18 |                      |                      |                             |                                                                                  |     |                                                                                                                       |                                                                           |                                                                                                                                                                                                                                                                                |
| 19 |                      |                      |                             |                                                                                  |     |                                                                                                                       |                                                                           |                                                                                                                                                                                                                                                                                |
| 20 |                      |                      |                             |                                                                                  |     |                                                                                                                       |                                                                           |                                                                                                                                                                                                                                                                                |
| 21 |                      |                      |                             |                                                                                  |     |                                                                                                                       |                                                                           |                                                                                                                                                                                                                                                                                |
| 22 |                      |                      |                             |                                                                                  |     |                                                                                                                       |                                                                           |                                                                                                                                                                                                                                                                                |
| 23 | BC + MMS.            | Shet 2014            | RCT                         | HIV+ 18-60 yrs, IND. n=315(Int)<br>n=316(Ctrl)                                   | HIV | Weekly automated motivational voice call, followed by weekly MMS.                                                     | ART in TNPs: VL.<br>ART in TNPs: Pill count.<br>Feasibility: PC received. | No difference. (Number of virological failures: 15.6% vs. 15.5%. Time to virological failure: aHR= 0.96(0.65-1.43), p= 0.85) / No impact.<br>No difference. (27% vs. 21.7%; aIRR=1.24(0.94-1.63), p=0.13) / No impact.<br>86% of calls received by patients / Highly feasible. |
| 24 |                      |                      |                             |                                                                                  |     |                                                                                                                       |                                                                           |                                                                                                                                                                                                                                                                                |
| 25 |                      |                      |                             |                                                                                  |     |                                                                                                                       |                                                                           |                                                                                                                                                                                                                                                                                |
| 26 |                      |                      |                             |                                                                                  |     |                                                                                                                       |                                                                           |                                                                                                                                                                                                                                                                                |
| 27 |                      |                      |                             |                                                                                  |     |                                                                                                                       |                                                                           |                                                                                                                                                                                                                                                                                |
| 28 |                      |                      |                             |                                                                                  |     |                                                                                                                       |                                                                           |                                                                                                                                                                                                                                                                                |
| 29 | SMS                  | Walsh 2012           | UnCtrlled trial.            | HIV+ Adults on ART, GBR. n=14                                                    | HIV | Pill-box w/ MEM + weekly SMS wrt med taking + up to 3 late dose SMS reminders.                                        | ART in APs: Self-report + MEM.<br>Acceptability: Self-report.             | 99.5% baseline adherence, 98% at 24W. No difference in missed doses (4.8% in 0-12W; 6.3% in 13-24W)<br>64% satisfied, 50% found SMS & system useful. 55% found reminders irritating / Moderately acceptable.                                                                   |
| 30 |                      |                      |                             |                                                                                  |     |                                                                                                                       |                                                                           |                                                                                                                                                                                                                                                                                |
| 31 |                      |                      |                             |                                                                                  |     |                                                                                                                       |                                                                           |                                                                                                                                                                                                                                                                                |
| 32 |                      |                      |                             |                                                                                  |     |                                                                                                                       |                                                                           |                                                                                                                                                                                                                                                                                |
| 33 | SMS                  | Lim 2008             | Quasi-experimental: HxCtrl. | STI clinic, NZL. n=293(Int)<br>n=303(HxCtrl)                                     | CT  | SMS to contact clinic for CT test result.                                                                             | TAT: Time from test to treat.                                             | No change in median time to treat (3 days vs. 4 days, t = - 1.3, p<0.1) / No impact.                                                                                                                                                                                           |
| 34 |                      |                      |                             |                                                                                  |     |                                                                                                                       |                                                                           |                                                                                                                                                                                                                                                                                |
| 35 |                      |                      |                             |                                                                                  |     |                                                                                                                       |                                                                           |                                                                                                                                                                                                                                                                                |
| 36 | SMS                  | Menon-Johansson 2006 | Quasi-experimental.         | At clinic w/untreated CT, GBR. n=28(Int)<br>n=21(Ctrl)                           | CT  | SMS to contact clinic for CT test result.                                                                             | TAT: Time from test to diagnosis & test to treat.                         | Shorter mean time to diagnosis. (7.9 days vs. 12.5; p<0.001)<br>Shorter median time to treat. (8.5 days vs. 15; p=0.005) / Effective.                                                                                                                                          |
| 37 |                      |                      |                             |                                                                                  |     |                                                                                                                       |                                                                           |                                                                                                                                                                                                                                                                                |
| 38 |                      |                      |                             |                                                                                  |     |                                                                                                                       |                                                                           |                                                                                                                                                                                                                                                                                |
| 39 | SMS+PC               | Barnabas 2016        | RCT                         | 16-49 yrs., ZAF & UGA. n=284(Int)<br>n=224(Ctrl)                                 | HIV | SMS promoting male circumcision 3W, 6-7W after tested negative. Follow-up phone call 1M & 2M following SMS reminders. | PB: Self-report.                                                          | Significant difference in reaching outcome at 3M (Intervention vs clinic referral); 48% (RR=1.72 95% CI 1.36-2.17, p values < 0.0001) in SMS reminder group and 47% (RR=1.67, 95%CI 1.29-2.14, p value = 0.0001) in lay counsellor follow-up achieved MC at 3M / Effective     |
| 40 |                      |                      |                             |                                                                                  |     |                                                                                                                       |                                                                           |                                                                                                                                                                                                                                                                                |
| 41 |                      |                      |                             |                                                                                  |     |                                                                                                                       |                                                                           |                                                                                                                                                                                                                                                                                |
| 42 |                      |                      |                             |                                                                                  |     |                                                                                                                       |                                                                           |                                                                                                                                                                                                                                                                                |
| 43 |                      |                      |                             |                                                                                  |     |                                                                                                                       |                                                                           |                                                                                                                                                                                                                                                                                |
| 44 |                      |                      |                             |                                                                                  |     |                                                                                                                       |                                                                           |                                                                                                                                                                                                                                                                                |
| 45 | SMS + MMS.           | Cornelius 2013       | UnCtrlled trial.            | African-Americans age 13-18, USA. n=40                                           | HIV | HIV-prevention SMS + knowledge question for                                                                           | PB: Self-report.                                                          | Improved condom attitudes & HIV knowledge (83% vs.78% correct answers) / No impact.                                                                                                                                                                                            |
| 46 |                      |                      |                             |                                                                                  |     |                                                                                                                       |                                                                           |                                                                                                                                                                                                                                                                                |



|    |                      |                   |                               |                                                                         |     |                                                                               |                                                                                                          |                                                                                                                                                                                                                                                                                            |
|----|----------------------|-------------------|-------------------------------|-------------------------------------------------------------------------|-----|-------------------------------------------------------------------------------|----------------------------------------------------------------------------------------------------------|--------------------------------------------------------------------------------------------------------------------------------------------------------------------------------------------------------------------------------------------------------------------------------------------|
| 1  |                      |                   |                               |                                                                         | 3W. | Acceptability: Self-report.                                                   | 97% satisfied w/ number of SMS. 86% reported SMS not interfering w/ daily activities/ Highly acceptable. |                                                                                                                                                                                                                                                                                            |
| 2  |                      |                   |                               |                                                                         |     | Feasibility: Completion rate.                                                 | 100% at pretest; 90% at 3M FU/ Highly feasible.                                                          |                                                                                                                                                                                                                                                                                            |
| 3  |                      |                   |                               |                                                                         |     |                                                                               |                                                                                                          |                                                                                                                                                                                                                                                                                            |
| 4  | PC                   | DiClemente 2014   | RCT                           | High-risk African-American women 14-20 yrs, USA. n=342(Int) n=359(Ctrl) | CT  | PC w/ prevention messages every 8W.                                           | PB: % diagnosed w/ CT or GC.<br>PB: Self-report.                                                         | Fewer participants diagnosed w/ CT & GC (90 vs. 104; RR = 0.5 (0.28-0.88), p=0.02. 48 vs. 54; RR = 0.4 (0.15-1.02), p=0.06) / Effective.<br>Higher condom use (MD=0.08(0.06 to 0.10) p=0.04) / Effective.                                                                                  |
| 5  |                      |                   |                               |                                                                         |     |                                                                               |                                                                                                          |                                                                                                                                                                                                                                                                                            |
| 6  |                      |                   |                               |                                                                         |     |                                                                               |                                                                                                          |                                                                                                                                                                                                                                                                                            |
| 7  |                      |                   |                               |                                                                         |     |                                                                               |                                                                                                          |                                                                                                                                                                                                                                                                                            |
| 8  | SMS + cash incentive | Juzang 2011       | Non-randomized Ctrlled trial. | African-American men 16-20 yrs, USA. n=30/group                         | HIV | 3 weekly SMS HIV prevention messages + \$40 for completion.                   | PB: Self-report.                                                                                         | No statistical difference in % of protected sex. Higher awareness of sexual health / No impact.                                                                                                                                                                                            |
| 9  |                      |                   |                               |                                                                         |     |                                                                               | Feasibility: Retention rate.                                                                             | 20 (67%) retained in Ctrl & 19 (63%) in SMS group after 2nd FU / Moderately feasible.                                                                                                                                                                                                      |
| 10 |                      |                   |                               |                                                                         |     |                                                                               |                                                                                                          |                                                                                                                                                                                                                                                                                            |
| 11 |                      |                   |                               |                                                                         |     |                                                                               |                                                                                                          |                                                                                                                                                                                                                                                                                            |
| 12 | SMS                  | Odeny 2014        | RCT                           | Circumcised male at clinic, 18+ yrs, KE. n=600(Int) n=600(Ctrl)         | HIV | Daily SMS for 1wk + SMS on days 8, 14, 21, 28, 35, 41, and 42 post-procedure. | PB: Self-report.                                                                                         | Abstinence of sexual activity before 42-day follow up: 139/491(28.3%) vs. 124/493(25.2%) in control group (RR=1.13(0.91-1.38), p=0.3)/ No impact.                                                                                                                                          |
| 13 |                      |                   |                               |                                                                         |     |                                                                               |                                                                                                          |                                                                                                                                                                                                                                                                                            |
| 14 |                      |                   |                               |                                                                         |     |                                                                               |                                                                                                          |                                                                                                                                                                                                                                                                                            |
| 15 |                      |                   |                               |                                                                         |     |                                                                               |                                                                                                          |                                                                                                                                                                                                                                                                                            |
| 16 | SMS                  | Reback 2015       | UnCtrlled trial.              | MSM drug users 18-65 yrs, USA. n=52                                     | HIV | Daily SMS for 2W to reduce risky sexual behaviours.                           | PB: Self-report.                                                                                         | Reduction in anal sex (6.9 vs. 2.6, t97=2.82, p<0.05) and unprotected anal sex (1.8 vs. 0.5, t97=2.19, p<0.05) in past 2M/ Effective.                                                                                                                                                      |
| 17 |                      |                   |                               |                                                                         |     |                                                                               |                                                                                                          |                                                                                                                                                                                                                                                                                            |
| 18 |                      |                   |                               |                                                                         |     |                                                                               |                                                                                                          |                                                                                                                                                                                                                                                                                            |
| 19 | PC                   | Belzer 2015       | RCT                           | HIV+ 12-29 yrs, USA. n=19(Int) n=18(Ctrl)                               | HIV | PC 1hr from time to take medication.                                          | Acceptability: Self-report.                                                                              | 94% satisfied w/ call length and 81% would continue receiving calls / Highly acceptable.                                                                                                                                                                                                   |
| 20 |                      |                   |                               |                                                                         |     |                                                                               | Feasibility: Retention rate.                                                                             | 63% retention rate / Moderately feasible.                                                                                                                                                                                                                                                  |
| 21 |                      |                   |                               |                                                                         |     |                                                                               |                                                                                                          |                                                                                                                                                                                                                                                                                            |
| 22 |                      |                   |                               |                                                                         |     |                                                                               |                                                                                                          |                                                                                                                                                                                                                                                                                            |
| 23 | SMS                  | Dean 2012         | Feasibility study.            | HIV+ at antenatal clinics, ZAF. n=7                                     | HIV | SMS support group+ inquiries answered by physicians.                          | Acceptability: Self-report.                                                                              | Overall satisfaction.                                                                                                                                                                                                                                                                      |
| 24 |                      |                   |                               |                                                                         |     |                                                                               | Feasibility: Self-report.                                                                                | SMS easily kept confidential.                                                                                                                                                                                                                                                              |
| 25 |                      |                   |                               |                                                                         |     |                                                                               |                                                                                                          |                                                                                                                                                                                                                                                                                            |
| 26 |                      |                   |                               |                                                                         |     |                                                                               |                                                                                                          |                                                                                                                                                                                                                                                                                            |
| 27 | SMS                  | Roth 2014         | Feasibility study.            | Sex workers 18+ yrs, USA. n=26                                          | HIV | Cell phone diaries to collect info about sexual events.                       | Acceptability: Self-report.                                                                              | Cell-phone electronic dairies to collect sensitive information acceptable (84.6%)/ Highly acceptable.                                                                                                                                                                                      |
| 28 |                      |                   |                               |                                                                         |     |                                                                               | Feasibility: Completion rate.                                                                            | 90.3% surveys completed / Highly feasible.                                                                                                                                                                                                                                                 |
| 29 |                      |                   |                               |                                                                         |     |                                                                               |                                                                                                          |                                                                                                                                                                                                                                                                                            |
| 30 |                      |                   |                               |                                                                         |     |                                                                               |                                                                                                          |                                                                                                                                                                                                                                                                                            |
| 31 | SMS                  | Georgette 2016    | Feasibility study.            | ≥18yrs, HIV+, ZAF. n=88                                                 | HIV | Weekly SMS reminders to increase ART adherence and appointment reminders      | Acceptability: Self-report.                                                                              | 92% would recommend SMS program to a friend, 90.9% said frequency of SMS was just right, 2/88 felt the SMS program slightly violated their privacy. 97.7% reported it helped them remember to take medication. 77.3% agreed that it helped them remember appointments. / Highly acceptable |
| 32 |                      |                   |                               |                                                                         |     |                                                                               |                                                                                                          |                                                                                                                                                                                                                                                                                            |
| 33 |                      |                   |                               |                                                                         |     |                                                                               |                                                                                                          |                                                                                                                                                                                                                                                                                            |
| 34 |                      |                   |                               |                                                                         |     |                                                                               |                                                                                                          |                                                                                                                                                                                                                                                                                            |
| 35 | SMS                  | Reid 2014         | Cross-sectional study.        | HIV+, BWA. n=42(Int) n=41(Ctrl)                                         | HIV | SMS ARV pick-up reminder.                                                     | Acceptability: Self-report.                                                                              | SMS helpful 93% (Int) vs. 58% (Ctrl) (p<0.001). SMS may lead to serostatus disclosure 10% vs. 56% (p<0.001). 95% satisfied w/ appointment scheduling. 90% would continue receiving SMS / Highly acceptable.                                                                                |
| 36 |                      |                   |                               |                                                                         |     |                                                                               |                                                                                                          |                                                                                                                                                                                                                                                                                            |
| 37 |                      |                   |                               |                                                                         |     |                                                                               |                                                                                                          |                                                                                                                                                                                                                                                                                            |
| 38 | PC                   | Bauermeister 2014 | Feasibility study.            | MSM 18-30, USA. n=124                                                   | HIV | IVRS: microbicide use.                                                        | Feasibility: Self-report.                                                                                | 75.5% reported no problems using IVRS / Highly feasible.                                                                                                                                                                                                                                   |
| 39 |                      |                   |                               |                                                                         |     |                                                                               |                                                                                                          |                                                                                                                                                                                                                                                                                            |
| 40 | SMS + MMS.           | Cornelius 2011    | Feasibility study.            | African-Americans age 13-18, USA. n=12                                  | HIV | HIV-prevention SMS+knowledge question for 3W.                                 | Feasibility: Response rate.                                                                              | 80% response rate/ Highly feasible.                                                                                                                                                                                                                                                        |
| 41 |                      |                   |                               |                                                                         |     |                                                                               |                                                                                                          |                                                                                                                                                                                                                                                                                            |
| 42 |                      |                   |                               |                                                                         |     |                                                                               |                                                                                                          |                                                                                                                                                                                                                                                                                            |

Note: Int= intervention; Ctrl= control; HxCtrl= historical control; PB= preventative behaviors (i.e. risk reduction); PN= partner notification; TAT= turnaround time; ATT= attendance rate; ART= ART adherence; NAPs= non-adherent patients; AP= adherent patients; PVLA= Patients with various levels of adherence; TNPs= Treatment naive patients; VL= viral load; CD4= CD4 cell count; PC= phone call; FB= Facebook.

1  
2  
3  
4  
5  
6  
7  
8  
9  
10  
11  
12  
13  
14  
15  
16  
17  
18  
19  
20  
21  
22  
23  
24  
25  
26  
27  
28  
29  
30  
31  
32  
33  
34  
35  
36  
37  
38  
39  
40  
41  
42  
43  
44  
45  
46  
47  
48  
49

**Appendix 3. Table of studies by innovation (in rows) and by outcomes (in columns)**

|                                                        | <i>Outcome</i>                                   | <i>Attendance rate</i> | <i>ART adherence</i> | <i>Risk reduction</i> | <i>Partner notification</i> | <i>Turnaround time</i> | <i>Self-care</i> | <i>Feasibility<sup>†</sup></i> | <i>Acceptability<sup>†</sup></i> |
|--------------------------------------------------------|--------------------------------------------------|------------------------|----------------------|-----------------------|-----------------------------|------------------------|------------------|--------------------------------|----------------------------------|
|                                                        | <i>Digital Innovation</i>                        |                        |                      |                       |                             |                        |                  |                                |                                  |
| <i>Number of Studies by Type of Digital Innovation</i> | <i>mHealth Innovations (SMS/phone call only)</i> | 30*                    | 24                   | 6                     | 0                           | 2*                     | 0                | 5                              | 2                                |
|                                                        | <i>Internet-based m/eHealth Innovations</i>      | 6                      | 4                    | 5                     | 0                           | 0                      | 1                | 4                              | 1                                |
|                                                        | <i>Combined innovations</i>                      | 1                      | 1                    | 0                     | 2                           | 0                      | 1                | 3                              | 1                                |

*Note: \*1 study evaluated both attendance rate and turnaround time and was counted as part of the 30 studies on attendance rate. † studies reporting feasibility and acceptability as secondary outcomes are counted elsewhere in the table depending on primary outcome.*

1  
2  
3  
4  
5  
6  
7  
8  
9  
10  
11  
12  
13  
14  
15  
16  
17  
18  
19  
20  
21  
22  
23  
24  
25  
26  
27  
28  
29  
30  
31  
32  
33  
34  
35  
36  
37  
38  
39  
40  
41  
42  
43  
44  
45  
46  
47  
48  
49  
50  
51  
52  
53  
54  
55  
56  
57  
58  
59  
60

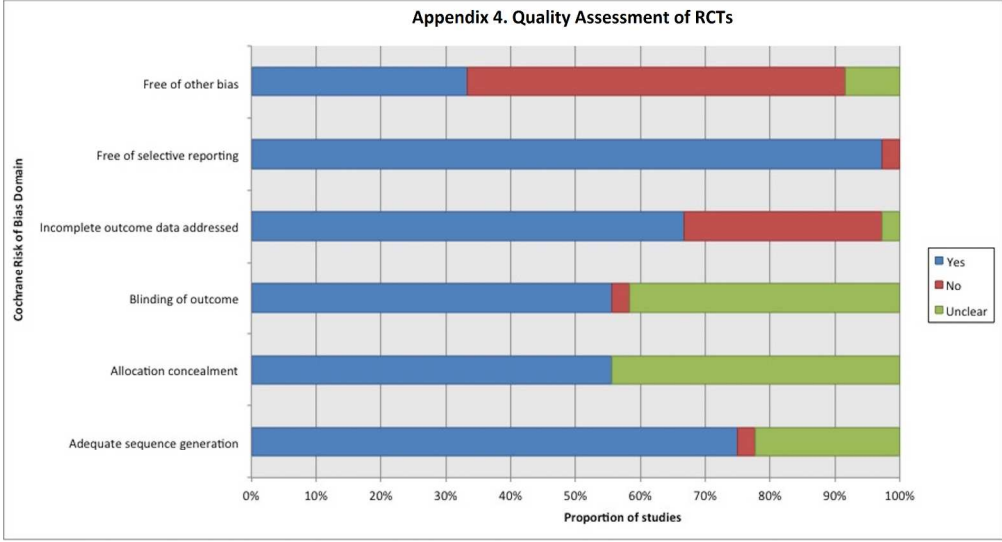

317x171mm (300 x 300 DPI)

review only

1  
2  
3  
4  
5  
6  
7  
8  
9  
10  
11  
12  
13  
14  
15  
16  
17  
18  
19  
20  
21  
22  
23  
24  
25  
26  
27  
28  
29  
30  
31  
32  
33  
34  
35  
36  
37  
38  
39  
40  
41  
42  
43  
44  
45  
46  
47  
48  
49  
50  
51  
52  
53  
54  
55  
56  
57  
58  
59  
60

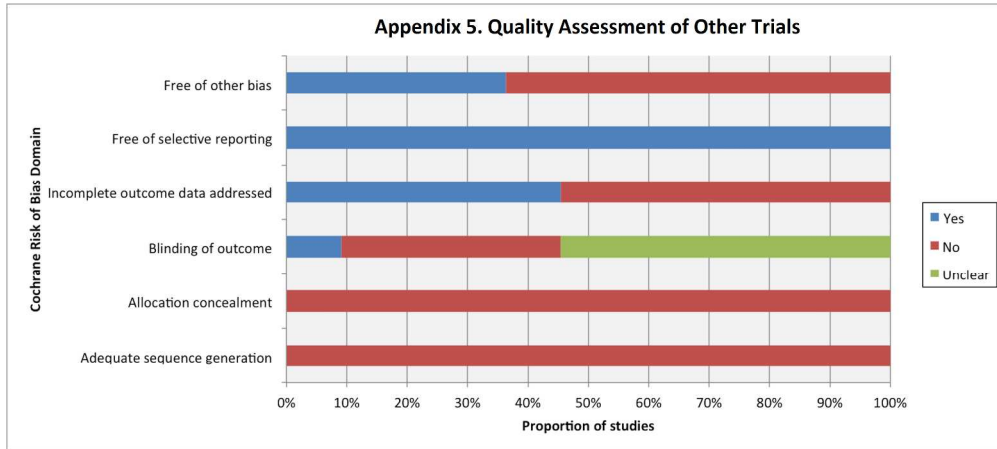

281x126mm (300 x 300 DPI)

er review only

1  
2  
3  
4  
5  
6  
7  
8  
9  
10  
11  
12  
13  
14  
15  
16  
17  
18  
19  
20  
21  
22  
23  
24  
25  
26  
27  
28  
29  
30  
31  
32  
33  
34  
35  
36  
37  
38  
39  
40  
41  
42  
43  
44  
45  
46  
47  
48  
49  
50  
51  
52  
53  
54  
55  
56  
57  
58  
59  
60

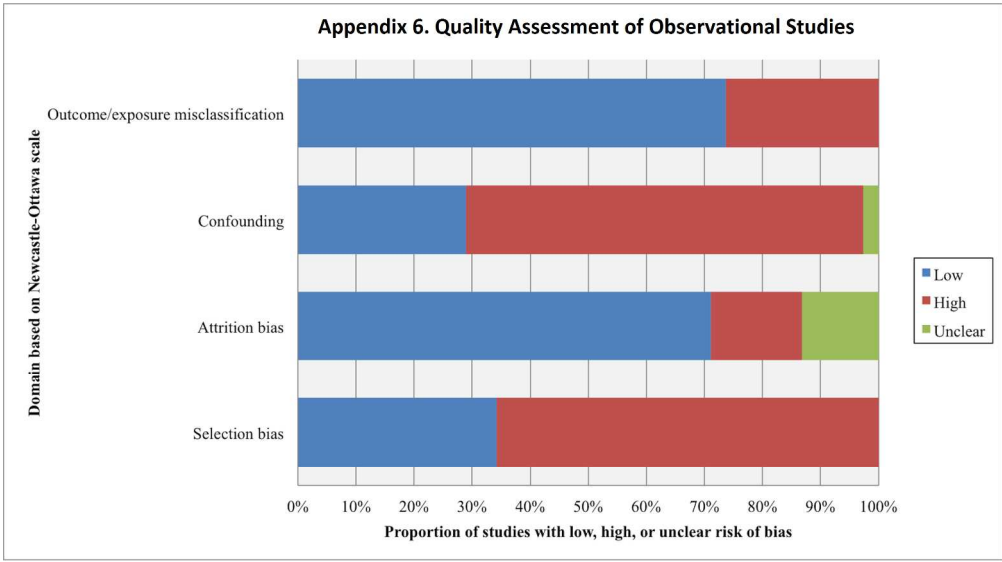

260x145mm (300 x 300 DPI)

review only

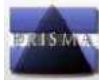

# PRISMA 2009 Checklist

1  
2  
3  
4  
5  
6  
7  
8  
9  
10  
11  
12  
13  
14  
15  
16  
17  
18  
19  
20  
21  
22  
23  
24  
25  
26  
27  
28  
29  
30  
31  
32  
33  
34  
35  
36  
37  
38  
39  
40  
41  
42  
43  
44  
45  
46  
47  
48  
49

| Section/topic                      | #  | Checklist item                                                                                                                                                                                                                                                                                              | Reported on page # |
|------------------------------------|----|-------------------------------------------------------------------------------------------------------------------------------------------------------------------------------------------------------------------------------------------------------------------------------------------------------------|--------------------|
| <b>TITLE</b>                       |    |                                                                                                                                                                                                                                                                                                             |                    |
| Title                              | 1  | Identify the report as a systematic review, meta-analysis, or both.                                                                                                                                                                                                                                         | 1                  |
| <b>ABSTRACT</b>                    |    |                                                                                                                                                                                                                                                                                                             |                    |
| Structured summary                 | 2  | Provide a structured summary including, as applicable: background; objectives; data sources; study eligibility criteria, participants, and interventions; study appraisal and synthesis methods; results; limitations; conclusions and implications of key findings; systematic review registration number. | 2                  |
| <b>INTRODUCTION</b>                |    |                                                                                                                                                                                                                                                                                                             |                    |
| Rationale                          | 3  | Describe the rationale for the review in the context of what is already known.                                                                                                                                                                                                                              | 3                  |
| Objectives                         | 4  | Provide an explicit statement of questions being addressed with reference to participants, interventions, comparisons, outcomes, and study design (PICOS).                                                                                                                                                  | 3                  |
| <b>METHODS</b>                     |    |                                                                                                                                                                                                                                                                                                             |                    |
| Protocol and registration          | 5  | Indicate if a review protocol exists, if and where it can be accessed (e.g., Web address), and, if available, provide registration information including registration number.                                                                                                                               | N/A                |
| Eligibility criteria               | 6  | Specify study characteristics (e.g., PICOS, length of follow-up) and report characteristics (e.g., years considered, language, publication status) used as criteria for eligibility, giving rationale.                                                                                                      | 4                  |
| Information sources                | 7  | Describe all information sources (e.g., databases with dates of coverage, contact with study authors to identify additional studies) in the search and date last searched.                                                                                                                                  | 4                  |
| Search                             | 8  | Present full electronic search strategy for at least one database, including any limits used, such that it could be repeated.                                                                                                                                                                               | 4                  |
| Study selection                    | 9  | State the process for selecting studies (i.e., screening, eligibility, included in systematic review, and, if applicable, included in the meta-analysis).                                                                                                                                                   | 4                  |
| Data collection process            | 10 | Describe method of data extraction from reports (e.g., piloted forms, independently, in duplicate) and any processes for obtaining and confirming data from investigators.                                                                                                                                  | 4                  |
| Data items                         | 11 | List and define all variables for which data were sought (e.g., PICOS, funding sources) and any assumptions and simplifications made.                                                                                                                                                                       | 4                  |
| Risk of bias in individual studies | 12 | Describe methods used for assessing risk of bias of individual studies (including specification of whether this was done at the study or outcome level), and how this information is to be used in any data synthesis.                                                                                      | 5                  |
| Summary measures                   | 13 | State the principal summary measures (e.g., risk ratio, difference in means).                                                                                                                                                                                                                               | 5                  |
| Synthesis of results               | 14 | Describe the methods of handling data and combining results of studies, if done, including measures of consistency (e.g., $I^2$ for each meta-analysis).                                                                                                                                                    | 4                  |



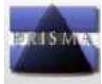

# PRISMA 2009 Checklist

Page 1 of 2

| Section/topic                 | #  | Checklist item                                                                                                                                                                                           | Reported on page # |
|-------------------------------|----|----------------------------------------------------------------------------------------------------------------------------------------------------------------------------------------------------------|--------------------|
| Risk of bias across studies   | 15 | Specify any assessment of risk of bias that may affect the cumulative evidence (e.g., publication bias, selective reporting within studies).                                                             | 5                  |
| Additional analyses           | 16 | Describe methods of additional analyses (e.g., sensitivity or subgroup analyses, meta-regression), if done, indicating which were pre-specified.                                                         | 4                  |
| <b>RESULTS</b>                |    |                                                                                                                                                                                                          |                    |
| Study selection               | 17 | Give numbers of studies screened, assessed for eligibility, and included in the review, with reasons for exclusions at each stage, ideally with a flow diagram.                                          | 5                  |
| Study characteristics         | 18 | For each study, present characteristics for which data were extracted (e.g., study size, PICOS, follow-up period) and provide the citations.                                                             | Abstraction Table  |
| Risk of bias within studies   | 19 | Present data on risk of bias of each study and, if available, any outcome level assessment (see item 12).                                                                                                | 8                  |
| Results of individual studies | 20 | For all outcomes considered (benefits or harms), present, for each study: (a) simple summary data for each intervention group (b) effect estimates and confidence intervals, ideally with a forest plot. | 6                  |
| Synthesis of results          | 21 | Present results of each meta-analysis done, including confidence intervals and measures of consistency.                                                                                                  | 6                  |
| Risk of bias across studies   | 22 | Present results of any assessment of risk of bias across studies (see Item 15).                                                                                                                          | 8, Supplementary   |
| Additional analysis           | 23 | Give results of additional analyses, if done (e.g., sensitivity or subgroup analyses, meta-regression [see Item 16]).                                                                                    | 6                  |
| <b>DISCUSSION</b>             |    |                                                                                                                                                                                                          |                    |
| Summary of evidence           | 24 | Summarize the main findings including the strength of evidence for each main outcome; consider their relevance to key groups (e.g., healthcare providers, users, and policy makers).                     | 8                  |
| Limitations                   | 25 | Discuss limitations at study and outcome level (e.g., risk of bias), and at review-level (e.g., incomplete retrieval of identified research, reporting bias).                                            | 10                 |
| Conclusions                   | 26 | Provide a general interpretation of the results in the context of other evidence, and implications for future research.                                                                                  | 10                 |
| <b>FUNDING</b>                |    |                                                                                                                                                                                                          |                    |
| Funding                       | 27 | Describe sources of funding for the systematic review and other support (e.g., supply of data); role of funders for the systematic review.                                                               | 13                 |

From: Moher D, Liberati A, Tetzlaff J, Altman DG, The PRISMA Group (2009). Preferred Reporting Items for Systematic Reviews and Meta-Analyses: The PRISMA Statement. PLoS Med 6(7): e1000097. doi:10.1371/journal.pmed1000097

For peer review only - <http://bmjopen.bmj.com/site/about/guidelines.xhtml>

For more information, visit: [www.prisma-statement.org](http://www.prisma-statement.org).

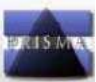

# PRISMA 2009 Checklist

- 1
- 2
- 3
- 4
- 5
- 6
- 7
- 8
- 9
- 10
- 11
- 12
- 13
- 14
- 15
- 16
- 17
- 18
- 19
- 20
- 21
- 22
- 23
- 24
- 25
- 26
- 27
- 28
- 29
- 30
- 31
- 32
- 33
- 34
- 35
- 36
- 37
- 38
- 39
- 40
- 41
- 42
- 43
- 44
- 45
- 46
- 47
- 48
- 49

For peer review only

# BMJ Open

## Do Digital Innovations for HIV and Sexually Transmitted Infections work? Results from a Systematic Review (1996-2017).

|                                 |                                                                                                                                                                                                                                                                                                                                                                                                                                                                                                                                  |
|---------------------------------|----------------------------------------------------------------------------------------------------------------------------------------------------------------------------------------------------------------------------------------------------------------------------------------------------------------------------------------------------------------------------------------------------------------------------------------------------------------------------------------------------------------------------------|
| Journal:                        | <i>BMJ Open</i>                                                                                                                                                                                                                                                                                                                                                                                                                                                                                                                  |
| Manuscript ID                   | bmjopen-2017-017604.R2                                                                                                                                                                                                                                                                                                                                                                                                                                                                                                           |
| Article Type:                   | Research                                                                                                                                                                                                                                                                                                                                                                                                                                                                                                                         |
| Date Submitted by the Author:   | 20-Sep-2017                                                                                                                                                                                                                                                                                                                                                                                                                                                                                                                      |
| Complete List of Authors:       | Daher, Jana; Research Institute of the McGill University Health Centre<br>Vijh, Rohit; Research Institute of the McGill University Health Centre<br>Linthwaite, Blake; Research Institute of the McGill University Health Centre<br>Dave, Saily; Research Institute of the McGill University Health Centre<br>Kim, John; National HIV/AIDS Labs, Public Health Agency of Canada<br>Dheda, Keertan; University of Cape Town<br>Peter, Trevor; Clinton Health Access Initiative (CHAI)<br>Pai, Nitika; McGill University, Medicine |
| <b>Primary Subject Heading</b>: | HIV/AIDS                                                                                                                                                                                                                                                                                                                                                                                                                                                                                                                         |
| Secondary Subject Heading:      | Health services research, Global health                                                                                                                                                                                                                                                                                                                                                                                                                                                                                          |
| Keywords:                       | mHealth/eHealth, Innovations, HIV, Sexually transmitted Infections, systematic reviews                                                                                                                                                                                                                                                                                                                                                                                                                                           |
|                                 |                                                                                                                                                                                                                                                                                                                                                                                                                                                                                                                                  |

SCHOLARONE™  
Manuscripts

only

1  
2  
3 Do Digital Innovations for HIV and Sexually Transmitted Infections work? Results from a  
4 Systematic Review (1996-2017).  
5  
6  
7

8 Jana Daher<sup>1</sup>, MSc (PH), Rohit Vijh<sup>1</sup>, BSc, Blake Linthwaite<sup>1</sup>, BSc, Saily Dave<sup>1</sup>, BSc,  
9 John Kim<sup>2</sup>, PhD, Keertan Dheda<sup>3</sup>, MBBCh, PhD, Trevor Peter<sup>4</sup>, PhD,  
10 Nitika Pant Pai<sup>1,5</sup>, MD PhD  
11  
12  
13  
14

15  
16  
17 Affiliations:

18  
19 <sup>1</sup> Division of Clinical Epidemiology, Research Institute of the McGill University Health Centre,  
20 Montreal, Canada.  
21

22 <sup>2</sup> Chief, National HIV/AIDS Labs, National Labs, Winnipeg, Canada.  
23

24 <sup>3</sup> Professor, Department of Pulmonology, UCT Lung Institute, University of Cape Town, South  
25 Africa.  
26

27 <sup>4</sup> Scientific Director, Diagnostics, Clinton Health Access Initiative (CHAI), Boston, USA.  
28

29 <sup>1,5</sup> Associate Professor, Department of Medicine, McGill University, Montreal, Canada.  
30  
31  
32

33 Corresponding author:

34 [nitika.pai@mcgill.ca](mailto:nitika.pai@mcgill.ca)  
35  
36

37 Address: 5252 boul de Maisonneuve West, Division of Clinical Epidemiology, McGill  
38 University Health Center, Montreal, Quebec, H4A 3S5  
39

40 Telephone number: 514-934-1934 x44729  
41

42 Keywords: mHealth/eHealth; Innovations; HIV; Sexually transmitted Infections; systematic  
43 reviews, meta-analyses.  
44  
45  
46  
47  
48  
49  
50  
51

---

## ABSTRACT

---

**Objective:** Digital innovations with internet/mobile phones offer a potential cost saving solution for overburdened health systems with high service delivery costs to improve efficiency of HIV/STI control initiatives. However, their overall evidence has not yet been appraised. We evaluated the feasibility and impact of all digital innovations for all HIV/STIs.

**Design:** Systematic review.

**Setting/Participants:** All settings/all participants.

**Intervention:** We classified digital innovations into: a) Mobile health-based (mHealth: SMS (short message service)/phone calls), b) Internet-based mobile and/or electronic health (m/eHealth: social media, avatar-guided computer programs, websites, mobile applications, streamed soap opera videos), and c) combined innovations (included both SMS/phone calls and internet-based m/eHealth).

**Primary and secondary outcome measures:** Feasibility, Acceptability, Impact.

**Methods:** We searched Databases- MEDLINE via PubMed, Embase, Cochrane CENTRAL, and Web of Science, abstracted data, explored heterogeneity, performed a random effects subgroup analysis.

**Results:** We reviewed 99 studies, 63 (64%) were from America/Europe, 36 (36%) from Africa/Asia; 79% (79/99) were clinical trials; 84% (83/99) evaluated impact. Of innovations, mHealth-based: 70% (69/99); internet-based: 21% (21/99); combined: 9% (9/99). All digital innovations were highly accepted (26/31; 84%), feasible (20/31; 65%). Regarding impacted measures: mHealth-based innovations (SMS) significantly improved ART adherence (pooled OR=2.15 [95%CI: 1.18, 3.91]), and clinic attendance rates (pooled OR=1.76 [95%CI: 1.28, 2.42]); Internet-based innovations improved clinic attendance (6/6), ART adherence (4/4), self-care (1/1), while reducing risk (5/5); combined innovations increased clinic attendance, ART adherence, partner notifications, and self-care. Confounding (68%) and selection bias (66%) were observed in observational studies and attrition bias in 31% of clinical trials.

**Conclusion:** Digital innovations were acceptable, feasible, and generated impact. A trend towards use of internet-based and combined (internet and mobile) innovations was noted. Large scale up studies of high quality, with new integrated impact metrics, and cost effectiveness are needed. Findings will appeal to all stakeholders in the HIV/STI global initiatives space.

### Strengths of the review

- An updated and comprehensive systematic review/meta-analysis of all innovations in HIV/STI.
- Evaluation of study quality with biases, subgroup analyses and sensitivity analyses.
- Evaluation of metrics and measures for objective and subjective data.

### Limitations of the review

- Limited data were reported from Sub-Saharan Africa and Southeast Asia (29%, 29/99).
- Limited evidence (18/99, 18%) was available for STIs (other than HIV).
- Limited data on cost effectiveness from high burden settings.
- A lack of integrated online impact metrics to evaluate internet-based eHealth innovations.



## INTRODUCTION

---

HIV/STI infections remain a public health concern worldwide - a million new HIV/STI infections are acquired every day, with cumulative disease burden exceeding 500 million infections.<sup>1-5</sup> Regarding HIV, countries are working hard to achieve the new UNAIDS 90-90-90 treatment targets;<sup>6</sup> however, structural and societal barriers such as stigma, low socio-economic status, and geographical isolation, impede access to quality care for marginalized populations who are disproportionately impacted by the HIV/AIDS epidemic.<sup>7-8</sup> Likewise, a lack of timely testing and poor retention in care impairs efforts to control HIV/STIs.<sup>7-10</sup> To improve early testing, linkage and retention in care, health care systems globally are seeking solutions to improve population engagement, awareness, and education, and efficient care for their hard-to-reach populations. It is imperative to plug gaps in health care service delivery.<sup>11-12</sup> Digital innovations such as electronic health (eHealth), mobile health (mHealth), and combined innovations offer promising solutions to improve health service delivery. eHealth encompasses non-internet and internet-enabled mHealth as well as other internet-based health interventions. These innovations, together with expanded mobile and internet networks, global connectivity, and affordability, present opportunities to change the future landscape of health care service delivery.

The World Bank estimates that globally, 96% of the world's population and 70% of the world's poorest have access to a mobile phone.<sup>13</sup> Of seven billion, two billion (30%) individuals own a smartphone; approximately 50% of mobile phone users access the internet through their phones.<sup>14-15</sup> Technological access has created a portal for social media and other internet-based health interventions.<sup>16</sup> A rapid diffusion of mobile phones and internet technologies are prime drivers of this disruptive phenomenon in health, aptly titled, the creative destruction of medicine.<sup>17</sup> In recent years, visionary foundations (*Grameen, Bill and Melinda Gates Foundation, UNAIDS, Vodafone*) have, with funding, created opportunities for innovative thinking in health. To date, ninety-five countries have evaluated some digital health innovations.<sup>11</sup> This is most evident in under-resourced settings where low-cost and sustainable solutions are needed to solve complex global health challenges.<sup>18</sup>

Digital innovations were first used in non-communicable diseases and later became popular in infectious disease.<sup>19</sup> In the field of HIV/STIs, a *Lancet* study demonstrated the effectiveness of mHealth-based SMS innovations on adherence to antiretroviral therapy (ART).<sup>20</sup> As novel digital innovations and strategies continue to be developed and tested, many smaller reviews and systematic reviews were published. However, a vast majority of these reviews only evaluated a single innovation (e.g. SMS, social media), one or two outcomes, and restricted exploration in select sub-groups (people living with HIV (PLHIV), pregnant women, adolescents, men who have sex with men (MSM)).<sup>21-27</sup> These reviews failed to provide a comprehensive summary of all innovations for program planning and research. Due to a rapid expansion of digital innovations, and an increased popularity of combined innovations (2013- ), a need for a comprehensive up-to-date synthesis on all innovations for HIV/STIs was felt.

Our primary objective was to generate a high quality overview/systematic review that summarizes all digital innovations across all populations and outcomes in HIV/STIs. Our

secondary objective was to inform researchers, policy makers, funders with evidence for their decisions on implementation and scale-up.<sup>11</sup>

## METHODS

---

PRISMA (Preferred Reporting Items for Systematic Reviews and Meta-Analyses) and Cochrane guidelines were followed.<sup>28</sup>

### Data Sources and Searches

We searched MEDLINE via PubMed, Embase, Cochrane CENTRAL, and Web of Science for a 21-year period from Feb 1996 up to March 2017, with no language restrictions.

### Search Strategy

Keywords used were HIV, AIDS, STI, mhealth, mobile health, ehealth, telemedicine, mobile applications and social media. For a full search strategy, please refer to Appendix 1. (#1 (“HIV” [MeSH] OR “acquired immunodeficiency syndrome” [tiab]), OR #2 (sexually transmitted infections [mh] OR sexually transmitted disease\* [tiab]), AND #3 (“mHealth” [tiab] OR “mobile health” [tiab] OR short messag\* [tiab] OR “eHealth” [MeSH] OR “telemedicine” [MeSH] OR social medi\* [tiab] OR “mobile applications” [tiab]).

### Study Selection

Two reviewers independently screened and evaluated citations for eligibility (JD & RV) and two others (BL & SD) independently assessed quality. A senior reviewer was consulted (NPP) for discordance.

### Eligibility Criteria

Any clinical trials or observational study designs that evaluated any digital (m/eHealth) technology with any reported outcomes (Refer to Figure 1) were included.

### Data Abstraction

Two reviewers (RV, JD) independently abstracted all the data. A pre-piloted data abstraction form, was used to abstract the following items: study design, study population, sample size, digital innovation type, HIV/STIs, outcome measures (e.g. impact, acceptability and feasibility), and metrics (e.g. attendance rate, completion rate, satisfaction) (Refer to Appendix 2). We referred to a previously published framework to define and further classify the following metrics for impact, acceptability, and feasibility.<sup>29</sup>

### Subgroup Pooled Analyses

We classified study designs and then classified digital innovations into three groups:<sup>30</sup>

- a) mHealth (SMS and phone calls only; i.e. non-internet based);
- b) Internet-enabled mHealth and other internet-based eHealth (mobile application, website, online campaign, streamed soap opera videos, avatar-guided computer programs);
- c) Combined innovations (innovations that combined both mHealth (SMS/phone calls) with internet enabled m/eHealth).

1  
2  
3 Only one subgroup reported similar outcomes which could be pooled, SMS and phone calls, for  
4 the following outcomes: a) clinic attendance with SMS; and b) ART adherence via Medication  
5 Event Monitoring System (MEMS) caps, with SMS. We pooled these outcomes using a random  
6 effects subgroup analysis. Given the diversity in the sample populations between studies, we  
7 used the random effect meta-analysis model with DerSimonian and Laird estimator (moments  
8 method) of the between-study variance to calculate the pooled effect. We generated forest plots  
9 for visual representation of heterogeneity and pooled odds ratios (OR) with 95% confidence  
10 intervals (CI). We performed all statistical analyses using Stata/IC, version 13 (StataCorp,  
11 College Station, Texas USA).<sup>31</sup>  
12  
13

### 14 **Narrative Analysis**

15 We narratively described all other data using as follows:  
16  
17

18 Digital innovations were classified into the following groups based on the strength of evidence:  
19 high/strong evidence (metrics at 75-100%), moderate evidence (51-74%), and low/weak  
20 evidence (50% or less).  
21

22 **Acceptability:** Acceptability was defined as the receptivity in using digital innovations.  
23

24 **Feasibility:** Feasibility was defined as the perceived convenience in using digital innovations. It  
25 was reported with various metrics: completion, retention, response and referral rates.  
26

27 **Impact:** Impact was defined as a statistically significant improvement in measured outcomes  
28 compared to a comparator group (i.e. control group or baseline observations). The metrics used  
29 to evaluate impact were: A) attendance rate, B) ART adherence, C) risk reduction, D) self-care  
30 and E) partner notification. Impact measures were evaluated on two criteria: effect size and  
31 precision. Effect size was assessed when data on a comparator group was made available.  
32 Precision of the effect estimate was assessed whenever reported, as it reflects the variance or  
33 spread of results.  
34  
35

### 36 **Quality Assessment**

37 We assessed study quality for both clinical trials and observational studies. We used the  
38 Cochrane Risk of Bias Tool for trials, and Newcastle-Ottawa quality assessment scale for  
39 observational studies.  
40  
41  
42

## 43 **RESULTS**

---

44  
45  
46 Of 4252 citations identified through our extensive search, 792 were selected for full-text  
47 screening, and 99 citations met our inclusion criteria and were included in this review for  
48 evidence synthesis (Refer: Figure 1).  
49  
50

### 51 **Study characteristics**

52 By geographical location, 37% (37/99) of studies were conducted in North America, 26%  
53 (26/99) in Sub-Saharan Africa, 24% (24/99) in Europe, 7% (7/99) in Oceania, 3% (3/99) in  
54 Southeast Asia, and 2% (2/99) in South America.  
55  
56  
57  
58  
59  
60

1  
2  
3 By study design, the majority were trials: 38% (38/99) were RCTs, 16% (16/99) uncontrolled  
4 trials, and 1% (1/99) non-randomised controlled trials. Others included quasi-experimental  
5 studies, of which many used historical controls (24%, 24/99), and observational studies (i.e.  
6 cross-sectional and feasibility studies) (20%, 20/99).  
7

8  
9 HIV was the most frequently reported infection (74%, 73/99 studies), followed by  
10 chlamydia/gonorrhoea (CT/GC) (10%, 10/99). Combinations of HIV with STIs (e.g., syphilis)  
11 (8%, 8/99), human papillomavirus (HPV) (4%, 4/99) and hepatitis A/B/C (HBV) (4%, 4/99)  
12 were also reported.  
13

14  
15 In terms of study populations, people living with HIV were prominent across studies (42%,  
16 42/99) followed by other high-risk groups (i.e. MSM/bisexual men, drug users, pregnant  
17 women/mother-infant pairs, African-Americans, sex workers, and visible minorities) (28%,  
18 28/99), general clinic attendees (16%, 16/99), CT/ HBV infected individuals (4%, 4/99), and  
19 residents of a specific area (9%, 9/99).  
20

## 21 **Innovations**

22 Digital innovations were documented across the spectrum.

23  
24 mHealth innovations (SMS/phone calls only) were evaluated in 70% (69/99) of studies.<sup>20 32-99</sup>  
25 72% (50/69) were SMS-based and 28% (19/69) used phone calls or a combination of both (Refer  
26 to Figure 2 and Appendix 3).  
27

28  
29 Internet-enabled mHealth and other internet-based eHealth innovations were evaluated in 21%  
30 (21/99) of studies.<sup>100-120</sup> These innovations consisted of many different forms: social media and  
31 online campaigns (9/21), avatar-guided computer programs (2/21), mobile applications (5/21),  
32 combination of social media and websites (2/21), websites (1/21), telemedicine services (1/21)  
33 and streamed soap opera videos (1/21) (Refer to Figure 2 and Appendix 3).  
34

35  
36 Combined innovations were evaluated in 9% (9/99) of studies.<sup>121-129</sup> Innovations consisted of:  
37 SMS + websites/ interactive websites (4/9), SMS + mobile application (3/9) and SMS + social  
38 media (including online campaigns) (2/9). (Refer to Figure 2 and Appendix 3).  
39

## 40 **Measures and Metrics**

41 A vast majority (84%, 83/99) of studies focused on impact measure and metrics, while about  
42 12% (12/99) focused only on feasibility, and the remaining 4% (4/99) on acceptability. Within  
43 impact measures, metrics such as clinic attendance rates were reported in 45% (37/83) of studies,  
44 followed by ART adherence at 35% (29/83), HIV/STIs risk reduction behaviors at 13% (11/83),  
45 turnaround time from testing to treatment at 2% (2/83), partner notification at 2% (2/83), and  
46 self-care at 2% (2/83).  
47

## 48 **Analyses:**

### 49 **Subgroup Pooled Analyses**

50  
51 It was possible to perform subgroup analyses on outcomes that were consistently documented:  
52 clinic attendance in 14 quasi-experimental studies that used SMS reminders and MEMS-based  
53 ART adherence in 4 RCTs evaluating SMS. The pooled estimate for the impact of SMS  
54 reminders on attendance rates was 1.76 [95%CI: 1.28, 2.42] (Refer to Figure 3A). The pooled  
55  
56  
57  
58  
59  
60

1  
2  
3 estimate for the impact of SMS on ART adherence tracked via MEMS caps was also significant,  
4 OR= 2.15 [95%CI: 1.18, 3.91] (Refer to Figure 3B).<sup>32,47-48</sup>  
5  
6

## 7 **Narrative Analysis**

### 8 **Impact**

#### 9 **Non-internet based mHealth (SMS/PC only)**

10  
11  
12 Of 69 studies, positive results were reported for the following outcomes: clinic attendance (63%,  
13 19/30 studies, of which 84% reached statistical significance); ART adherence (63%, 15/24  
14 studies, of which 93% reached statistical significance); turnaround time from testing to treatment  
15 (67%, 2/3 studies). However, SMS reported a limited effect on risk reduction behaviors (3/7,  
16 43%).  
17  
18  
19

#### 20 **Internet-based m/eHealth:**

21  
22 Studies evaluating internet-based eHealth innovations (21/99) reported results that were largely  
23 in favor of the following innovations: social media-based interventions for clinic attendance;  
24 avatar-guided and mobile applications for ART adherence; social media, avatar, and soap opera  
25 videos for risk reduction behaviors; mobile app for self-care.  
26  
27

28 Social media contributed to higher testing uptake rates in all studies (6/6, 100%). A social media-  
29 based campaign increased HIV testing by 252% (n= 1500; 19% from baseline 5.4%, p<0.01) and  
30 Syphilis testing by 248% (18.8% from baseline 5.4%, p<0.01), while another campaign  
31 increased HIV testing by 52% compared to control (n=625; 63.7% vs. 42% in controls, OR=2.9  
32 [95%CI: 1.8-4.7]).<sup>100,115</sup> Four campaigns guaranteed rapid in-home HIV testing for all those who  
33 requested it online.<sup>100-101, 108, 111, 116</sup>  
34  
35

36 Avatar-guided programs and mobile applications improved ART adherence in all studies (4/4).  
37 Statistically significant outcomes were reported in 2/4 programs (50%). These were: a) A  
38 personalized avatar-guided computer program improved adherence (n=240; p=0.046); b) a  
39 mobile application with immunosuppression graphs and medication reminders lowered viral load  
40 (n= 28; p=0.023) and improved adherence (p=0.03) as well.<sup>102,104</sup> In the other two studies, an  
41 avatar-guided program improved viral suppression and a mobile application allowed for 100%  
42 adherence, but these were underpowered to detect a significant effect (n=76 and n=28,  
43 respectively).<sup>107,110</sup>  
44  
45

46 Social media, avatar and soap opera videos were successful at reducing risky sexual behavior in  
47 all the reported studies (5/5). However, significant results were reported in only 3/5 studies: a)  
48 Social media-based interventions decreased unprotected sex acts by 65% (n=31; 3.11 vs.  
49 baseline 8.96, p=0.042); b) soap opera videos on HIV prevention reduced condomless sex by  
50 78% (n=117; 78% reduction from baseline, p<0.001);<sup>103,106</sup> c) An avatar-guided computer  
51 program also lowered the odds of HIV transmission (n=240; OR= 0.46, p=0.012).<sup>102-103,106</sup> Even  
52 in two underpowered studies, social media-based interventions led to 40% and 67% higher  
53 condom uptake (n=70 and n=50, respectively).<sup>105,117</sup>  
54  
55  
56  
57  
58  
59  
60



1  
2  
3 A mobile application increased self-care in the sole study in this category (1/1). A significantly  
4 higher self-care performance among chronic HBV-infected individuals was reported compared to  
5 controls (n=53; p=0.001).<sup>112</sup>  
6  
7

### 8 **Combined innovations:**

9  
10 Studies evaluating combined innovations (9/99) showed success of social media + SMS in  
11 increasing clinic attendance and partner notification; interactive websites + SMS in improving  
12 ART adherence; and mobile app + SMS in increasing self-care. Among the five impact studies,  
13 80% reported a favorable outcome. An online campaign with SMS services increased CT, GC,  
14 and HIV tests uptake by 41%, 91%, and 190%, respectively,<sup>123</sup> an interactive website with SMS  
15 reminders improved ART adherence in drug-users (n=20; p=0.02),<sup>121</sup> a social media-based  
16 partner notification with SMS increased notified contacts by 144% (63.5% in 2011 from baseline  
17 26% in 2010),<sup>126</sup> and a mobile app with SMS significantly improved self-care performance in  
18 HIV-infected individuals compared to baseline (n=19; p=0.002).<sup>129</sup>  
19  
20

### 21 Acceptability and Feasibility

22 Overall, across studies that assessed acceptability/feasibility, digital innovations were found to  
23 be highly acceptable and feasible (75%-100%) in 26/31 and 20/31 studies, respectively. mHealth  
24 innovations (SMS/PC only) were highly acceptable and feasible in 81% (13/16) and 75% (12/16)  
25 of studies, respectively.  
26  
27

28 Internet-based m/eHealth innovations were highly acceptable and feasible in 92% (11/12) and  
29 45% (5/11) of studies, respectively. All included innovations (i.e. avatar, mobile app, social  
30 media and streamed videos) were highly acceptable.<sup>102-104,-106-107</sup> While avatar-guided programs  
31 were rated high on feasibility, social media-based strategies were found to be less feasible<sup>101-103</sup>  
32

33 Combined innovations were highly acceptable and feasible in 67% (2/3) and 75% (3/4) of  
34 studies, respectively.<sup>121,124</sup> The innovations that were rated high involved a combination of SMS  
35 and interactive websites.  
36  
37

### 38 **Quality**

39 Studies were individually evaluated on quality criteria and biases were noted. Across trials,  
40 losses to follow-up were reported in 31% of RCTs and 55% of quasi-trials. Additionally, biases  
41 (i.e. misclassification, recall bias) were of concern in 58% of the RCTs and 64% of quasi  
42 randomized trials (Refer to Appendix 4 & 5).  
43  
44

45 In observational studies, confounding (68%) and selection bias (66%) were observed. (Refer to  
46 Appendix 6). Studies with small sample sizes, low power or insufficient follow-up time (e.g. 3  
47 weeks or less) sometimes provided contradictory results when objective and subjective metrics  
48 evaluated the same outcome.  
49  
50

## 51 DISCUSSION

---

### 52 **Summary of findings**

53  
54  
55  
56  
57  
58  
59  
60



1  
2  
3 Overall, digital innovations reported positive effects on key metrics. We noted a strong positive  
4 effect of digital innovations on clinic attendance rates (70%; 26/37), ART adherence (69%;  
5 20/29), risk reduction behaviors (67%; 8/12) and self-care (100%; 2/2). SMS/phone calls were  
6 not able to reduce risky sexual behaviours; however social-media based interventions,  
7 particularly interactive social media, were effective in reducing risky sexual behaviors.  
8 Acceptability was found to be high for all innovations. Feasibility estimates also remained high  
9 for all innovations, except for social media-based interventions, possibly due to a perceived lack  
10 of privacy and confidentiality. Combined innovations may thus offer promise in plugging this  
11 feasibility gap, with internet-based innovations compensating for limitations in SMS-only  
12 strategies and vice versa.  
13  
14

15  
16 While mHealth (SMS/phone calls only) innovations were highly effective in improving clinic  
17 attendance, ART adherence, and turnaround time from testing to treatment, they did not report  
18 on other outcomes. It should be noted that SMS and phone calls alone failed to reduce risky  
19 sexual behaviors, which was not surprising as it is challenging to reduce risky behaviors with a  
20 prescriptive SMS alone. Population engagement is essential for risk reduction through qualitative  
21 research.  
22  
23

24 While internet-based m/eHealth innovations (social media, avatar-guided computer programs,  
25 mobile apps, and soap opera videos) demonstrated positive evidence on impact metrics, not all  
26 studies reached statistical significance. Those that failed to report a statistically significant  
27 improvement in ART adherence had small sample sizes and were underpowered to detect these  
28 outcomes (n=76 vs. n=240), and had less frequent sessions over a shorter evaluation period (2  
29 sessions over 6 months vs. 4 sessions over 9 months).<sup>102 107</sup> For mobile applications, studies  
30 which reported significant effects recruited participants with varying level of adherence,<sup>104 110</sup>  
31 compared with studies which had high adherence at baseline ( $\geq 95\%$ ) and did not show  
32 significance (due to smaller changes in effect). For social media-based campaigns, the two  
33 studies that did not reach statistical significance in reducing risky sexual behaviors lacked an  
34 interactive component and simply displayed educational material, while the study that showed  
35 significant effect engaged the participants by allowing them to contact professional cognitive  
36 behavioral therapists via live chat sessions.<sup>103 105 117</sup>  
37  
38  
39

40 In terms of quality, confounding and selection bias were noted in observational and quasi-  
41 experimental studies, and loss to follow-up in some trials. Nevertheless, the overall validity of  
42 the findings from this review was not threatened by biases, as a large proportion of our data were  
43 derived from trials. While clinical trials were generally high quality, observational studies were  
44 medium to low quality.  
45  
46

47 Consistent reporting of metrics was lacking, which prevented a comprehensive meta-analysis.  
48 Objectives, end points, metrics, and measures, are equally important in feasibility studies and  
49 must be well designed to generate high quality evidence.  
50

51 Our review is an exhaustive assessment of the role of digital innovations in improving prevention  
52 and care for HIV/STIs. Our findings resonate with many smaller systematic reviews, which have  
53 separately evaluated individual components of digital innovation, such as SMS-based  
54 mHealth.<sup>22-23 130-137</sup> Other systematic reviews evaluating social media-based interventions  
55 reported similar findings to ours, in improved testing uptake or improvements in sexual health.<sup>25-  
56 27 138-139</sup>  
57  
58  
59  
60

1  
2  
3 Our review makes a valuable addition to the growing body of evidence by highlighting the  
4 success of other interactive and engaging innovations such as avatar-guided computer programs,  
5 mobile apps, streamed soap opera videos, and combined innovations. These integrated  
6 innovations and programs are gaining in popularity, because of their power to engage rural and  
7 urban audiences at many levels.  
8

9  
10 Designing combined innovations that complementarity of various media, methods, platforms,  
11 and messaging may delivery best results. This complementarity may also encourage participant  
12 engagement, to improve prevention and care metrics and measures sustainably over time.  
13 Engagement is challenging when only one innovation (e.g. mHealth SMS/phone calls only) is  
14 the sole focus, where boredom is likely.  
15

### 16 **Caveats and implications for future research**

17 There are some caveats to considering design and evaluation of innovations. Future research  
18 needs to be focussed on tailoring innovations to the context and population, and program  
19 objectives. Innovations aiming to reduce risky sexual behaviors could be interactive and tailored  
20 to the setting and population, with a deep understanding of patients' needs and preferences.<sup>137 140-</sup>  
21 <sup>141</sup> Any communication with patients could be customized for timing to avoid fatigue with its  
22 uptake. For example, patients may be more responsive to weekly versus daily SMS ART  
23 reminders.<sup>32 142</sup>  
24  
25  
26

27 Study quality is essential to generating meaningful results. Large and representative samples of  
28 the underlying population and sound statistical techniques during data analysis or sampling  
29 methodology, can minimize selection bias. Exploring reasons for differential losses to follow-up  
30 could inform future studies. Wherever possible, a control group should be included to  
31 differentiate Hawthorne effect from the effect of the intervention.<sup>143</sup> Trials and impact designs  
32 can prevent or reduce confounding. Following checklists, like the one by the WHO mHealth  
33 Technical Evidence Review Group on mHealth innovations, is suggested and encouraged.<sup>144</sup>  
34  
35

36 Objective measures (e.g. HIV/STIs diagnosis, VL load) are desired in reporting of quantitative  
37 outcomes, over subjective self-reported data (e.g. condom use, self-reported adherence). This  
38 could potentially reduce some biases (misclassification biases/ or, desirability/recall biases) that  
39 are observed with subjective reporting.  
40  
41

42 Qualitative data are rich and complement the understanding of all the contextual and population  
43 needs, and capture the dynamics of sustainability and change. They need to be integrated with  
44 quantitative data to provide a holistic picture of uptake of any digital innovation.  
45  
46

47 Quality of digital data will merit from an improvement. Across studies, a lack of integrated  
48 online impact metrics in evaluating the success of innovations was evident. With continuously  
49 evolving digital media, inventing new ways to evaluate acceptability and feasibility becomes  
50 necessary. For example, some studies tracked online metrics via Google analytics.<sup>74 100-101 121-124</sup>  
51 Synergy with industry powered metrics could be a new wave to measure success of digital  
52 innovations.  
53  
54

55 To scale up proven innovations, a multi-stakeholder engagement is necessary. For that, data and  
56 metrics that appeal to all sections of stakeholders will be needed. In addition to improving the  
57  
58  
59  
60

1  
2  
3 quality of randomized controlled trials and quasi-experimental impact studies, qualitative studies,  
4 cost effectiveness studies, usability studies, are also needed.  
5

### 6 7 **Implications for policy and practice**

8 In consonance with other systematic reviews, evidence at-scale and over time was scarce.<sup>138</sup> This  
9 limits the projection of the long-term sustainability and cost effectiveness of digital innovations.  
10 More evidence on scale-up, cost savings and cost-effectiveness from Sub Saharan Africa and  
11 Asia is needed. Future investments that incentivize both: the development and evaluation of  
12 combined innovations by government and industry alike, and focus on sustainability of digital  
13 innovations with public and private partnerships, are urgently needed.  
14

### 15 16 **CONCLUSION**

---

17  
18 To control HIV/STIs globally, we need novel and disruptive innovations that will uniquely  
19 impact health outcomes across the spectrum of access, engagement, treatment and retention so as  
20 to impact health service delivery. On one hand, mHealth (SMS/phone calls only) and internet-  
21 based m/eHealth were found acceptable, feasible and offered complementarity in improving  
22 prevention and care of HIV/STIs. On the other hand, when combined, they provided customized  
23 and contextualized solutions for hard-to-reach populations.  
24  
25

26  
27 Innovations need to be proven for impact and cost effectiveness, using a combination of clinical  
28 trials, quasi-randomized studies, observational studies, qualitative research studies. Integrating  
29 these innovations across various levels of healthcare with clear evaluation, monitoring, and  
30 documentation of metrics will facilitate their integration within existing health service delivery  
31 models so as to efficiently impact health outcomes over time.  
32

33  
34 Findings from this comprehensive review will be informative to all stakeholders – innovators,  
35 researchers, healthcare practitioners, policy makers and funders – worldwide seeking evidence  
36 on integrating and funding innovations, to make the entire spectrum of HIV/STI care.  
37

### 38 39 **ACKNOWLEDGEMENT**

---

40  
41 The authors would like to acknowledge Ms. Megan Smallwood for her assistance in editing the  
42 manuscript.  
43

### 44 45 **FOOTNOTES**

---

#### 46 47 **Contributors:**

48  
49 NPP, JD: concept, design.

50  
51 NPP: data critiquing, write-up, critique, and overall responsibility of the data.

52  
53 JD: data synthesis, write-up, critiquing.

54  
55 RV, BL and SD: data synthesis, write-up and critique.

56  
57 JK, TP and KD: write-up and critique.  
58  
59  
60

1  
2  
3 Final version approved by all authors  
4

5 **Competing Interests:**  
6

7 There are no conflicts of interest  
8

9 **Data Sharing:**  
10

11 No additional data are available. This is a systematic review/syntheses of existing studies,  
12 therefore all data are reported in the tables.  
13

14 **Funding:**  
15

16 Grand Challenges Canada Transition to Scale; Grant number 0710-05.  
17 FRSQ Salary Award Chercheur-Boursier Junior 2.  
18  
19

20  
21  
22  
23 **Figure Legends**  
24

25 Figure 1. PRISMA Flow Diagram

26 Figure 2. All Innovations by Outcome Type (font size enlarged)

27 Figure 3. Sub-Group Analyses  
28

29 3A. Sub-Group Analysis Pooled OR for Attendance

30 3B. Sub-Group Analysis Pooled OR for Adherence  
31  
32

33 **Appendices**  
34

35 Appendix 1. Search Strategy

36 Appendix 2. Abstraction Table

37 Appendix 3. Table of Studies by Innovation and by Outcomes

38 Appendix 4. Quality Assessment of RCTs

39 Appendix 5. Quality Assessment of Other Trials

40 Appendix 6. Quality Assessment of Observational Studies  
41  
42  
43  
44  
45  
46  
47  
48  
49  
50  
51  
52  
53  
54  
55  
56  
57  
58  
59  
60

## REFERENCES

1. The World Health Organization. Sexually transmitted infections (STIs): Fact sheet N°110: WHO Media Centre; 2015 [updated December 2015. Available from: <http://www.who.int/mediacentre/factsheets/fs110/en/> accessed 27 January 2016.
2. The World Health Organization. Hepatitis B: Fact sheet N°204: WHO Media Centre; 2015 [updated July 2015. Available from: <http://www.who.int/mediacentre/factsheets/fs204/en/> accessed 27 January 2016.
3. The World Health Organization. Hepatitis C: Fact sheet N°164 2015 [updated July 2015. Available from: <http://www.who.int/mediacentre/factsheets/fs164/en/> accessed 27 January 2016.
4. The Joint United Nations Programme on HIV/AIDS. Fact Sheet 2015 2015 [Available from: <http://www.unaids.org/en/resources/campaigns/HowAIDSchangedeverything/factsheet> accessed 17 December 2016.
5. Newman L, Rowley J, Vander Hoorn S, et al. Global Estimates of the Prevalence and Incidence of Four Curable Sexually Transmitted Infections in 2012 Based on Systematic Review and Global Reporting. *PLoS One* 2015;10(12):e0143304. doi: 10.1371/journal.pone.0143304  
PONE-D-15-31044 [pii] [published Online First: 2015/12/10]
6. The Joint United Nations Programme on HIV/AIDS. The Gap Report. Geneva: UNAIDS, 2014.
7. Kagee A, Remien RH, Berkman A, et al. Structural barriers to ART adherence in Southern Africa: Challenges and potential ways forward. *Glob Public Health* 2011;6(1):83-97. doi: 922541258 [pii]  
10.1080/17441691003796387 [published Online First: 2010/05/29]
8. Pai NP. Multiplexed point-of-care assays for HIV and co-infections for resource constrained settings: a perspective. *Future Microbiol* 2015;10(9):1393-6. doi: 10.2217/fmb.15.77 [published Online First: 2015/09/09]
9. Pai NP, Vadnais C, Denkinger C, et al. Point-of-care testing for infectious diseases: diversity, complexity, and barriers in low- and middle-income countries. *PLoS Med* 2012;9(9):e1001306. doi: 10.1371/journal.pmed.1001306  
PMEDICINE-D-12-01227 [pii] [published Online First: 2012/09/14]
10. Rosen S, Fox MP. Retention in HIV care between testing and treatment in sub-Saharan Africa: a systematic review. *PLoS Med* 2011;8(7):e1001056. doi: 10.1371/journal.pmed.1001056  
PMEDICINE-D-11-00096 [pii] [published Online First: 2011/08/04]
11. Ryu S. Book Review: mHealth: New Horizons for Health through Mobile Technologies: Based on the Findings of the Second Global Survey on eHealth (Global Observatory for eHealth Series, Volume 3). *Healthcare Informatics research* 2012;18(3):231-33. doi: 10.4258/hir.2012.18.3.231
12. Free C, Phillips G, Watson L, et al. The effectiveness of mobile-health technologies to improve health care service delivery processes: a systematic review and meta-analysis. *PLoS Med* 2013;10(1):e1001363. doi: 10.1371/journal.pmed.1001363  
PMEDICINE-D-12-00641 [pii] [published Online First: 2013/03/06]
13. The World Bank. Maximizing Mobile: Information and Communication Technologies for Development. . Washington DC: International Bank for Reconstruction and Development The World Bank 2012.
14. eMarketer. Smartphone user penetration as percentage of total global population from 2011 to 2018. : Statistica- The Statistics Portal; 2014 [Available from: <http://www.statista.com/statistics/203734/global-smartphone-penetration-per-capita-since-2005/> accessed 19 February 2016.



15. eMarketer. Mobile phone internet user penetration worldwide from 2014 to 2019. : Statistica- The Statistics Portal; 2014 [Available from: <http://www.statista.com/statistics/284202/mobile-phone-internet-user-penetration-worldwide/> accessed 19 February 2016.
16. Oulasvirta A, Rattenbury T, Ma L, et al. Habits make smartphone use more pervasive. *Personal and Ubiquitous Computing* 2012;16(1):105-14.
17. Topol EJ. The creative destruction of medicine: How the digital revolution will create better health care. . New York: Basic Books 2012.
18. Akter S, Ray P. mHealth - an Ultimate Platform to Serve the Unserved. *Yearb Med Inform* 2010;94-100. doi: me10010094 [pii] [published Online First: 2010/10/13]
19. Ali EE, Chew L, Yap KYL. Evolution and current status of mhealth research: A systematic review. *BMJ Innov* 2016;2(1):33-40. doi: 10.1136/bmjinnov-2015-000096
20. Lester RT, Ritvo P, Mills EJ, et al. Effects of a mobile phone short message service on antiretroviral treatment adherence in Kenya (WelTel Kenya1): a randomised trial. *Lancet* 2010;376(9755):1838-45. doi: S0140-6736(10)61997-6 [pii] 10.1016/S0140-6736(10)61997-6 [published Online First: 2010/11/13]
21. Ambia J, Mandala J. A systematic review of interventions to improve prevention of mother-to-child HIV transmission service delivery and promote retention. *Journal of the International AIDS Society* 2016;19(1):20309. doi: 10.7448/ias.19.1.20309 [published Online First: 2016/04/09]
22. Conserve DF, Jennings L, Aguiar C, et al. Systematic review of mobile health behavioural interventions to improve uptake of HIV testing for vulnerable and key populations. *J Telemed Telecare* 2017;23(2):347-59. doi: 10.1177/1357633x16639186 [published Online First: 2016/04/09]
23. L'Engle KL, Mangone ER, Parcesepe AM, et al. Mobile Phone Interventions for Adolescent Sexual and Reproductive Health: A Systematic Review. *Pediatrics* 2016;138(3) doi: 10.1542/peds.2016-0884 [published Online First: 2016/08/25]
24. Lima IC, Galvao MT, Alexandre Hde O, et al. Information and communication technologies for adherence to antiretroviral treatment in adults with HIV/AIDS. *Int J Med Inform* 2016;92:54-61. doi: 10.1016/j.ijmedinf.2016.04.013 [published Online First: 2016/06/19]
25. Dunne A, McIntosh J, Mallory D. Adolescents, Sexually Transmitted Infections, and Education Using Social Media: A Review of the Literature. *JNP-J Nurse Pract* 2014;10(6):409-16. doi: 10.1016/j.nurpra.2014.03.020
26. Jones K, Eathington P, Baldwin K, et al. The Impact of Health Education Transmitted Via Social Media or Text Messaging on Adolescent and Young Adult Risky Sexual Behavior: A Systematic Review of the Literature. *Sex Transm Dis* 2014;41(7):413-19. doi: 10.1097/olq.0000000000000146
27. Schnall R, Travers J, Rojas M, et al. eHealth Interventions for HIV Prevention in High-Risk Men Who Have Sex With Men: A Systematic Review. *J Med Internet Res* 2014;16(5):228-37. doi: 10.2196/jmir.3393
28. Moher D, Liberati A, Tetzlaff J, et al. Preferred reporting items for systematic reviews and meta-analyses: the PRISMA statement. *Ann Intern Med* 2009;151(4):264-9, W64. doi: 0000605-200908180-00135 [pii] [published Online First: 2009/07/23]
29. Chiavegatti T, Vijh R, Pant Pai N. Metrics beyond accuracy for HIV point-of-care tests: a systematic review of evidence. *Canadian Journal of Infectious Diseases & Medical Microbiology* 2014;25(Suppl A):90A.
30. Pai M, Filion K. Classification of study designs (Version 8) Montreal: McGill University; 2014 [Available from: <http://www.teachepi.org/documents/courses/Classification%20Design.pdf>.
31. Harris R, Bradburn M, Deeks J, et al. metan: fixed- and random-effects meta-analysis. *Stata Journal* 2008;8(1):3-28.
32. Pop-Eleches C, Thirumurthy H, Habyarimana JP, et al. Mobile phone technologies improve adherence to antiretroviral treatment in a resource-limited setting: a randomized controlled trial of text



- message reminders. *AIDS* 2011;25(6):825-34. doi: 10.1097/QAD.0b013e32834380c1 [published Online First: 2011/01/22]
33. Dowshen N, Kuhns LM, Johnson A, et al. Improving adherence to antiretroviral therapy for youth living with HIV/AIDS: a pilot study using personalized, interactive, daily text message reminders. *J Med Internet Res* 2012;14(2):e51. doi: v14i2e51 [pii] 10.2196/jmir.2015 [published Online First: 2012/04/07]
34. Menon-Johansson AS, McNaught F, Mandalia S, et al. Texting decreases the time to treatment for genital Chlamydia trachomatis infection. *Sex Transm Infect* 2006;82(1):49-51. doi: 82/1/49 [pii] 10.1136/sti.2004.014381 [published Online First: 2006/02/08]
35. Finocchiaro-Kessler S, Gautney BJ, Khamadi S, et al. If you text them, they will come: using the HIV infant tracking system to improve early infant diagnosis quality and retention in Kenya. *AIDS* 2014;28 Suppl 3:S313-21. doi: 10.1097/QAD.0000000000000332 00002030-201407001-00011 [pii] [published Online First: 2014/07/06]
36. Lim EJ, Haar J, Morgan J. Can text messaging results reduce time to treatment of Chlamydia trachomatis? *Sex Transm Infect* 2008;84(7):563-4. doi: sti.2008.032441 [pii] 10.1136/sti.2008.032441 [published Online First: 2008/08/30]
37. Bailey S, Scalley B, Gilles M. Text 2 treat - using SMS to recall clients for treatment. *Int J STD AIDS* 2014;25(14):1038-40. doi: 0956462414530108 [pii] 10.1177/0956462414530108 [published Online First: 2014/04/04]
38. Smillie K, Van Borek N, Abaki J, et al. A qualitative study investigating the use of a mobile phone short message service designed to improve HIV adherence and retention in care in Canada (WelTel BC1). *J Assoc Nurses AIDS Care* 2014;25(6):614-25. doi: S1055-3290(14)00040-5 [pii] 10.1016/j.jana.2014.01.008 [published Online First: 2014/04/29]
39. Reback CJ, Fletcher JB, Shoptaw S, et al. Exposure to Theory-Driven Text Messages is Associated with HIV Risk Reduction Among Methamphetamine-Using Men Who have Sex with Men. *AIDS Behav* 2015;19 Suppl 2:130-41. doi: 10.1007/s10461-014-0985-7 [published Online First: 2015/01/08]
40. Evans C, Turner K, Blake H, et al. Text messaging to encourage uptake of HIV testing amongst African communities: Findings from a theory based feasibility study. *HIV Medicine* 2015;16(Suppl 2):54.
41. Dowshen N, Kuhns LM, Gray C, et al. Feasibility of interactive text message response (ITR) as a novel, real-time measure of adherence to antiretroviral therapy for HIV+ youth. *AIDS Behav* 2013;17(6):2237-43. doi: 10.1007/s10461-013-0464-6 [published Online First: 2013/04/03]
42. Cornelius JB, Dmochowski J, Boyer C, et al. Text-messaging-enhanced HIV intervention for African American adolescents: a feasibility study. *J Assoc Nurses AIDS Care* 2013;24(3):256-67. doi: S1055-3290(12)00140-9 [pii] 10.1016/j.jana.2012.06.005 [published Online First: 2012/11/06]
43. Ammassari A, Trotta MP, Mussini C, et al. Mobile phone intervention based on short message system (SMS) improve adherence behavior in HIV-infected non-adherent to antiretroviral therapy. The HI-Vision Study. *Infection* 2010;38(Suppl 52):52.
44. Ammassari A, Trotta MP, Shalev N, et al. Timed short messaging service improves adherence and virological outcomes in HIV-1-infected patients with suboptimal adherence to antiretroviral therapy. *J Acquir Immune Defic Syndr* 2011;58(4):e113-5. doi: 10.1097/QAI.0b013e3182359d2a 00126334-201112010-00015 [pii] [published Online First: 2011/10/29]
45. Segaren N, Lewis T, Desinor O, et al. The distribution and use of cell phones to mothers of HIV-positive infants identified by the Haiti National Early Infant Diagnosis of HIV program (EID): a model for increasing adherence? XIX International AIDS Conference Washington DC, 2012.
46. Sheppard Z, Walsh J, Weston R. The TRxCare™ adherence support system: a pilot study of its acceptability to patients on virologically successful HAART. 18th Annual Conference of British HIV Association Birmingham, 2012.

- 1  
2  
3  
4  
5  
6  
7  
8  
9  
10  
11  
12  
13  
14  
15  
16  
17  
18  
19  
20  
21  
22  
23  
24  
25  
26  
27  
28  
29  
30  
31  
32  
33  
34  
35  
36  
37  
38  
39  
40  
41  
42  
43  
44  
45  
46  
47  
48  
49  
50  
51  
52  
53  
54  
55  
56  
57  
58  
59  
60
47. da Costa TM, Barbosa BJ, Gomes e Costa DA, et al. Results of a randomized controlled trial to assess the effects of a mobile SMS-based intervention on treatment adherence in HIV/AIDS-infected Brazilian women and impressions and satisfaction with respect to incoming messages. *Int J Med Inform* 2012;81(4):257-69. doi: S1386-5056(11)00204-8 [pii]  
10.1016/j.ijmedinf.2011.10.002 [published Online First: 2012/02/03]
48. Sabin LL, Bachman DeSilva M, Gill CJ, et al. Improving Adherence to Antiretroviral Therapy With Triggered Real-time Text Message Reminders: The China Adherence Through Technology Study. *J Acquir Immune Defic Syndr* 2015;69(5):551-9. doi: 10.1097/QAI.0000000000000651 [published Online First: 2015/04/19]
49. Brook G, Farmer T, Murphy S, et al. Using SMS text reminders to reduce 'did not attend' (DNA) rates in sexual health and HIV appointment clinics. *Sex Transm Infect* 2013;89(Suppl 1):A1-A428.
50. Kliner M, Knight A, Mamvura C, et al. Using no-cost mobile phone reminders to improve attendance for HIV test results: a pilot study in rural Swaziland. *Infect Dis Poverty* 2013;2(1):12. doi: 2049-9957-2-12 [pii]  
10.1186/2049-9957-2-12 [published Online First: 2013/07/16]
51. Farmer T, Brook G, McSorley J, et al. Using short message service text reminders to reduce 'did not attend' rates in sexual health and HIV appointment clinics. *Int J STD AIDS* 2014;25(4):289-93. doi: 0956462413502325 [pii]  
10.1177/0956462413502325 [published Online First: 2013/09/04]
52. Brook G, Burton J, McSorley J, et al. The effectiveness of SMS texts for reminding patients at high risk of STIs and HIV to return for testing. *Sex Transm Infect* 2013;89(Suppl 1):A1-A428.
53. Guy R, Wand H, Knight V, et al. SMS reminders improve re-screening in women and heterosexual men with chlamydia infection at Sydney Sexual Health Centre: a before-and-after study. *Sex Transm Infect* 2013;89(1):11-5. doi: sextrans-2011-050370 [pii]  
10.1136/sextrans-2011-050370 [published Online First: 2012/04/21]
54. Burton J, Brook G, McSorley J, et al. The utility of short message service (SMS) texts to remind patients at higher risk of STIs and HIV to reattend for testing: a controlled before and after study. *Sex Transm Infect* 2014;90(1):11-3. doi: sextrans-2013-051228 [pii]  
10.1136/sextrans-2013-051228 [published Online First: 2013/09/26]
55. Desai M, Burns F, Mercey D, et al. Active recall of men who have sex with men (MSM) for an HIV/STI testing: a feasible and effective strategy? *HIV Medicine* 2014;15(Suppl 3):17-159.
56. Kharbanda EO, Stockwell MS, Fox HW, et al. Text message reminders to promote human papillomavirus vaccination. *Vaccine* 2011;29(14):2537-41. doi: S0264-410X(11)00125-3 [pii]  
10.1016/j.vaccine.2011.01.065 [published Online First: 2011/02/09]
57. Vilella A, Bayas JM, Diaz MT, et al. The role of mobile phones in improving vaccination rates in travelers. *Prev Med* 2004;38(4):503-9. doi: 10.1016/j.ypmed.2003.12.005  
S0091743503003475 [pii] [published Online First: 2004/03/17]
58. Downing SG, Cashman C, McNamee H, et al. Increasing chlamydia test of re-infection rates using SMS reminders and incentives. *Sex Transm Infect* 2013;89(1):16-9. doi: sextrans-2011-050454 [pii]  
10.1136/sextrans-2011-050454 [published Online First: 2012/06/26]
59. Odeny TA, Bailey RC, Bukusi EA, et al. Text messaging to improve attendance at post-operative clinic visits after adult male circumcision for HIV prevention: a randomized controlled trial. *PLoS One* 2012;7(9):e43832. doi: 10.1371/journal.pone.0043832  
PONE-D-12-11992 [pii] [published Online First: 2012/09/08]
60. de Tolly K, Skinner D, Nembaware V, et al. Investigation into the use of short message services to expand uptake of human immunodeficiency virus testing, and whether content and dosage have impact. *Telemed J E Health* 2012;18(1):18-23. doi: 10.1089/tmj.2011.0058 [published Online First: 2011/12/14]

- 1  
2  
3  
4  
5  
6  
7  
8  
9  
10  
11  
12  
13  
14  
15  
16  
17  
18  
19  
20  
21  
22  
23  
24  
25  
26  
27  
28  
29  
30  
31  
32  
33  
34  
35  
36  
37  
38  
39  
40  
41  
42  
43  
44  
45  
46  
47  
48  
49  
50  
51  
52  
53  
54  
55  
56  
57  
58  
59  
60
61. Bigna JJ, Noubiap JJ, Kouanfack C, et al. Effect of mobile phone reminders on follow-up medical care of children exposed to or infected with HIV in Cameroon (MORE CARE): a multicentre, single-blind, factorial, randomised controlled trial. *Lancet Infect Dis* 2014;14(7):600-8. doi: S1473-3099(14)70741-8 [pii]  
10.1016/S1473-3099(14)70741-8 [published Online First: 2014/06/17]
62. Rand CM, Brill H, Albertin C, et al. Effectiveness of centralized text message reminders on human papillomavirus immunization coverage for publicly insured adolescents. *J Adolesc Health* 2015;56(5 Suppl):S17-20. doi: S1054-139X(14)00707-1 [pii]  
10.1016/j.jadohealth.2014.10.273 [published Online First: 2015/04/13]
63. Matheson EC, Derouin A, Gagliano M, et al. Increasing HPV vaccination series completion rates via text message reminders. *J Pediatr Health Care* 2014;28(4):e35-9. doi: S0891-5245(13)00293-9 [pii]  
10.1016/j.pedhc.2013.09.001 [published Online First: 2013/11/10]
64. Schwartz SR, Clouse K, Yende N, et al. Acceptability and Feasibility of a Mobile Phone-Based Case Management Intervention to Retain Mothers and Infants from an Option B+ Program in Postpartum HIV Care. *Matern Child Health J* 2015;19(9):2029-37. doi: 10.1007/s10995-015-1715-0 [published Online First: 2015/02/07]
65. Belzer ME, Naar-King S, Olson J, et al. The use of cell phone support for non-adherent HIV-infected youth and young adults: an initial randomized and controlled intervention trial. *AIDS Behav* 2014;18(4):686-96. doi: 10.1007/s10461-013-0661-3 [published Online First: 2013/11/26]
66. Maduka O, Tobin-West CI. Adherence counseling and reminder text messages improve uptake of antiretroviral therapy in a tertiary hospital in Nigeria. *Niger J Clin Pract* 2013;16(3):302-8. doi: NigerJClinPract\_2013\_16\_3\_302\_113451 [pii]  
10.4103/1119-3077.113451 [published Online First: 2013/06/19]
67. Kebaya L, Nduati R, Bashir A. Efficacy of mobile phone use on adherence to nevirapine prophylaxis and retention in care among the HIV-exposed infants in PMTCT: a randomized controlled trial. *Arch Dis Child* 2014;99(Suppl 2):A1-A620.
68. Hardy H, Kumar V, Doros G, et al. Randomized controlled trial of a personalized cellular phone reminder system to enhance adherence to antiretroviral therapy. *AIDS Patient Care STDS* 2011;25(3):153-61. doi: 10.1089/apc.2010.0006 [published Online First: 2011/02/18]
69. DiClemente RJ, Wingood GM, Sales JM, et al. Efficacy of a telephone-delivered sexually transmitted infection/human immunodeficiency virus prevention maintenance intervention for adolescents: a randomized clinical trial. *JAMA Pediatr* 2014;168(10):938-46. doi: 1899236 [pii]  
10.1001/jamapediatrics.2014.1436 [published Online First: 2014/08/27]
70. Cornelius JB, Cato M, Lawrence JS, et al. Development and pretesting multimedia HIV-prevention text messages for mobile cell phone delivery. *J Assoc Nurses AIDS Care* 2011;22(5):407-13. doi: S1055-3290(10)00224-4 [pii]  
10.1016/j.jana.2010.11.007 [published Online First: 2011/01/25]
71. Dean AL, Makin JD, Kydd AS, et al. A pilot study using interactive SMS support groups to prevent mother-to-child HIV transmission in South Africa. *J Telemed Telecare* 2012;18(7):399-403. doi: jtt.2012.120118 [pii]  
10.1258/jtt.2012.120118 [published Online First: 2012/10/05]
72. Juzang I, Fortune T, Black S, et al. A pilot programme using mobile phones for HIV prevention. *J Telemed Telecare* 2011;17(3):150-3. doi: jtt.2010.091107 [pii]  
10.1258/jtt.2010.091107 [published Online First: 2011/01/29]
73. Kalichman SC, Kalichman MO, Cherry C, et al. Brief behavioral self-regulation counseling for HIV treatment adherence delivered by cell phone: an initial test of concept trial. *AIDS Patient Care STDS* 2011;25(5):303-10. doi: 10.1089/apc.2010.0367 [published Online First: 2011/04/05]

- 1  
2  
3  
4  
5  
6  
7  
8  
9  
10  
11  
12  
13  
14  
15  
16  
17  
18  
19  
20  
21  
22  
23  
24  
25  
26  
27  
28  
29  
30  
31  
32  
33  
34  
35  
36  
37  
38  
39  
40  
41  
42  
43  
44  
45  
46  
47  
48  
49  
50  
51  
52  
53  
54  
55  
56  
57  
58  
59  
60
74. Mbuagbaw L, Thabane L, Ongolo-Zogo P, et al. The Cameroon Mobile Phone SMS (CAMPS) trial: a randomized trial of text messaging versus usual care for adherence to antiretroviral therapy. *PLoS One* 2012;7(12):e46909. doi: 10.1371/journal.pone.0046909  
PONE-D-12-24092 [pii] [published Online First: 2012/12/14]
75. Moore DJ, Poquette A, Casaletto KB, et al. Individualized texting for adherence building (iTAB): improving antiretroviral dose timing among HIV-infected persons with co-occurring bipolar disorder. *AIDS Behav* 2015;19(3):459-71. doi: 10.1007/s10461-014-0971-0 [published Online First: 2014/12/17]
76. Norton BL, Person AK, Castillo C, et al. Barriers to using text message appointment reminders in an HIV clinic. *Telemed J E Health* 2014;20(1):86-9. doi: 10.1089/tmj.2012.0275 [published Online First: 2013/10/29]
77. Odeny TA, Bailey RC, Bukusi EA, et al. Effect of text messaging to deter early resumption of sexual activity after male circumcision for HIV prevention: a randomized controlled trial. *J Acquir Immune Defic Syndr* 2014;65(2):e50-7. doi: 10.1097/QAI.0b013e3182a0a050 [published Online First: 2013/07/13]
78. Bauermeister J, Carballo-Diequez A, Giguere R, et al. Interactive voice response system (IVRS): data quality considerations and lessons learned during a microbicide placebo adherence trial with young men who have sex with men. *Journal of Adolescent Health* 2014;54(2):S57-S58.
79. Belzer ME, Kolmodin MacDonell K, Clark LF, et al. Acceptability and Feasibility of a Cell Phone Support Intervention for Youth Living with HIV with Nonadherence to Antiretroviral Therapy. *AIDS Patient Care STDS* 2015;29(6):338-45. doi: 10.1089/apc.2014.0282 [published Online First: 2015/05/01]
80. Shet A, De Costa A, Kumarasamy N, et al. Effect of mobile telephone reminders on treatment outcome in HIV: evidence from a randomised controlled trial in India. *BMJ* 2014;349:g5978. [published Online First: 2014/01/01]
81. Reid MJ, Dhar SI, Cary M, et al. Opinions and attitudes of participants in a randomized controlled trial examining the efficacy of SMS reminders to enhance antiretroviral adherence: a cross-sectional survey. *J Acquir Immune Defic Syndr* 2014;65(2):e86-8. doi: 10.1097/QAI.0b013e3182a9c72b  
00126334-201402010-00027 [pii] [published Online First: 2014/01/21]
82. Roth AM, Hensel DJ, Fortenberry JD, et al. Feasibility and acceptability of cell phone diaries to measure HIV risk behavior among female sex workers. *AIDS Behav* 2014;18(12):2314-24. doi: 10.1007/s10461-014-0718-y [published Online First: 2014/03/20]
83. Barnabas RV, van Rooyen H, Tumwesigye E, et al. Uptake of antiretroviral therapy and male circumcision after community-based HIV testing and strategies for linkage to care versus standard clinic referral: a multisite, open-label, randomised controlled trial in South Africa and Uganda. *The lancet HIV* 2016;3(5):e212-20. doi: 10.1016/s2352-3018(16)00020-5 [published Online First: 2016/04/30]
84. Bassett IV, Coleman SM, Giddy J, et al. Sizanani: A Randomized Trial of Health System Navigators to Improve Linkage to HIV and TB Care in South Africa. *J Acquir Immune Defic Syndr* 2016;73(2):154-60. doi: 10.1097/qai.0000000000001025 [published Online First: 2016/09/16]
85. Cantudo-Cuenca MR, Manzano-Garcia M, Jimenez-Galan R, et al. Effect of mobile phone short messages on antiretroviral treatment adherence among HIV infected patients. *International Journal of Clinical Pharmacy* 2016;38 (6):517. doi: <http://dx.doi.org/10.1007/s11096-015-0240-y>
86. Haberer JE, Musiimenta A, Atukunda EC, et al. Short message service (SMS) reminders and real-time adherence monitoring improve antiretroviral therapy adherence in rural Uganda. *AIDS* 2016;30(8):1295-300. doi: 10.1097/qad.0000000000001021 [published Online First: 2016/01/14]
87. Jeffries C, Ross P, Matoff-Stepp S, et al. Ucare4life: Mobile texting to improve HIV care continuum outcomes for minority youth. *Topics in Antiviral Medicine* 2016;24 (E-1):427.



- 1  
2  
3  
4  
5  
6  
7  
8  
9  
10  
11  
12  
13  
14  
15  
16  
17  
18  
19  
20  
21  
22  
23  
24  
25  
26  
27  
28  
29  
30  
31  
32  
33  
34  
35  
36  
37  
38  
39  
40  
41  
42  
43  
44  
45  
46  
47  
48  
49  
50  
51  
52  
53  
54  
55  
56  
57  
58  
59  
60
88. Joseph Davey D, Nhavoto JA, Augusto O, et al. SMSaude: Evaluating Mobile Phone Text Reminders to Improve Retention in HIV Care for Patients on Antiretroviral Therapy in Mozambique. *J Acquir Immune Defic Syndr* 2016;73(2):e23-30. doi: 10.1097/qai.0000000000001115 [published Online First: 2016/09/16]
  89. Kampman C, Koedijk F, Driessen-Hulshof H, et al. Retesting young STI clinic visitors with urogenital Chlamydia trachomatis infection in the Netherlands; response to a text message reminder and reinfection rates: a prospective study with historical controls. *Sex Transm Infect* 2016;92(2):124-9. doi: 10.1136/sextrans-2015-052115 [published Online First: 2015/09/26]
  90. Kassaye SG, Ong'ech J, Sirengo M, et al. Cluster-Randomized Controlled Study of SMS Text Messages for Prevention of Mother-to-Child Transmission of HIV in Rural Kenya. *AIDS research and treatment* 2016;2016:1289328. doi: 10.1155/2016/1289328 [published Online First: 2017/01/06]
  91. McIver R, Dyda A, McNulty AM, et al. Text message reminders do not improve hepatitis B vaccination rates in an Australian sexual health setting. *Journal of the American Medical Informatics Association : JAMIA* 2016;23(e1):e88-92. doi: 10.1093/jamia/ocv145 [published Online First: 2015/10/27]
  92. Njuguna N, Ngure K, Mugo N, et al. The Effect of Human Immunodeficiency Virus Prevention and Reproductive Health Text Messages on Human Immunodeficiency Virus Testing Among Young Women in Rural Kenya: A Pilot Study. *Sex Transm Dis* 2016;43(6):353-9. doi: 10.1097/olq.0000000000000450 [published Online First: 2016/05/21]
  93. Nsagha DS, Lange I, Fon PN, et al. A Randomized Controlled Trial on the Usefulness of Mobile Text Phone Messages to Improve the Quality of Care of HIV and AIDS Patients in Cameroon. *Open AIDS J* 2016;10:93-103. doi: 10.2174/1874613601610010093 [published Online First: 2016/09/02]
  94. Nyatsanza F, McSorley J, Murphy S, et al. 'It's all in the message': the utility of personalised short message service (SMS) texts to remind patients at higher risk of STIs and HIV to reattend for testing-a repeat before and after study. *Sex Transm Infect* 2016;92(5):393-5. doi: 10.1136/sextrans-2015-052216 [published Online First: 2015/12/17]
  95. Rana AI, van den Berg JJ, Lamy E, et al. Using a Mobile Health Intervention to Support HIV Treatment Adherence and Retention Among Patients at Risk for Disengaging with Care. *AIDS Patient Care STDS* 2016;30(4):178-84. doi: 10.1089/apc.2016.0025 [published Online First: 2016/03/31]
  96. Rand CM, Vincelli P, Goldstein NP, et al. Effects of Phone and Text Message Reminders on Completion of the Human Papillomavirus Vaccine Series. *J Adolesc Health* 2017;60(1):113-19. doi: 10.1016/j.jadohealth.2016.09.011 [published Online First: 2016/11/12]
  97. Coleman J, Bohlin KC, Thorson A, et al. Effectiveness of an SMS-based maternal mHealth intervention to improve clinical outcomes of HIV-positive pregnant women. *AIDS care* 2017:1-8. doi: 10.1080/09540121.2017.1280126 [published Online First: 2017/01/22]
  98. Garofalo R, Kuhns LM, Hotton A, et al. A Randomized Controlled Trial of Personalized Text Message Reminders to Promote Medication Adherence Among HIV-Positive Adolescents and Young Adults. *AIDS Behav* 2016;20(5):1049-59. doi: 10.1007/s10461-015-1192-x [published Online First: 2015/09/13]
  99. Georgette N, Siedner MJ, Zanoni B, et al. The Acceptability and Perceived Usefulness of a Weekly Clinical SMS Program to Promote HIV Antiretroviral Medication Adherence in KwaZulu-Natal, South Africa. *AIDS Behav* 2016;20(11):2629-38. doi: 10.1007/s10461-016-1287-z [published Online First: 2016/10/21]
  100. Dowshen N, Lee S, Matty Lehman B, et al. IknowUshould2: Feasibility of a Youth-Driven Social Media Campaign to Promote STI and HIV Testing Among Adolescents in Philadelphia. *AIDS Behav* 2015;19 Suppl 2:106-11. doi: 10.1007/s10461-014-0991-9 [published Online First: 2015/01/08]

- 1  
2  
3  
4  
5  
6  
7  
8  
9  
10  
11  
12  
13  
14  
15  
16  
17  
18  
19  
20  
21  
22  
23  
24  
25  
26  
27  
28  
29  
30  
31  
32  
33  
34  
35  
36  
37  
38  
39  
40  
41  
42  
43  
44  
45  
46  
47  
48  
49  
50  
51  
52  
53  
54  
55  
56  
57  
58  
59  
60
101. Jones M, Aderogba K, Drunis L. Providing rapid HIV testing in their homes for men who have sex with men, recruited via social media. *HIV Medicine* 2015;16(Suppl 2):50-51.
  102. Kurth AE, Spielberg F, Cleland CM, et al. Computerized counseling reduces HIV-1 viral load and sexual transmission risk: findings from a randomized controlled trial. *J Acquir Immune Defic Syndr* 2014;65(5):611-20. doi: 10.1097/QAI.000000000000100 [published Online First: 2014/01/05]
  103. Lelutiu-Weinberger C, Pachankis JE, Gamarel KE, et al. Feasibility, Acceptability, and Preliminary Efficacy of a Live-Chat Social Media Intervention to Reduce HIV Risk Among Young Men Who Have Sex With Men. *AIDS Behav* 2015;19(7):1214-27. doi: 10.1007/s10461-014-0911-z [published Online First: 2014/09/27]
  104. Perera AI, Thomas MG, Moore JO, et al. Effect of a smartphone application incorporating personalized health-related imagery on adherence to antiretroviral therapy: a randomized clinical trial. *AIDS Patient Care STDS* 2014;28(11):579-86. doi: 10.1089/apc.2014.0156 [published Online First: 2014/10/08]
  105. Jones K, Baldwin KA, Lewis PR. The potential influence of a social media intervention on risky sexual behavior and Chlamydia incidence. *J Community Health Nurs* 2012;29(2):106-20. doi: 10.1080/07370016.2012.670579 [published Online First: 2012/04/28]
  106. Jones R, Hoover DR, Lacroix LJ. A randomized controlled trial of soap opera videos streamed to smartphones to reduce risk of sexually transmitted human immunodeficiency virus (HIV) in young urban African American women. *Nurs Outlook* 2013;61(4):205-15 e3. doi: S0029-6554(13)00061-4 [pii] 10.1016/j.outlook.2013.03.006 [published Online First: 2013/06/08]
  107. Naar-King S, Outlaw AY, Sarr M, et al. Motivational Enhancement System for Adherence (MESA): pilot randomized trial of a brief computer-delivered prevention intervention for youth initiating antiretroviral treatment. *J Pediatr Psychol* 2013;38(6):638-48. doi: jss132 [pii] 10.1093/jpepsy/jss132 [published Online First: 2013/01/30]
  108. Elliot E, Rossi M, McCormack S, et al. Identifying undiagnosed HIV in men who have sex with men (MSM) by offering HIV home sampling via online gay social media: a service evaluation. *Sex Transm Infect* 2016;92(6):470-3. doi: 10.1136/sextrans-2015-052090 [published Online First: 2016/05/26]
  109. Garrett R, Menacho L, Young SD. Ethical Issues in Using Social Media to Deliver an HIV Prevention Intervention: Results from the HOPE Peru Study. *Prevention science : the official journal of the Society for Prevention Research* 2017;18(2):225-32. doi: 10.1007/s11121-016-0739-z [published Online First: 2016/12/10]
  110. Himelhoch S, Kreyenbuhl J, Palmer-Bacon J, et al. Pilot feasibility study of Heart2HAART: a smartphone application to assist with adherence among substance users living with HIV. *AIDS care* 2017:1-7. doi: 10.1080/09540121.2016.1259454 [published Online First: 2017/01/04]
  111. Huang E, Marlin RW, Young SD, et al. Using Grindr, a Smartphone Social-Networking Application, to Increase HIV Self-Testing Among Black and Latino Men Who Have Sex With Men in Los Angeles, 2014. *AIDS education and prevention : official publication of the International Society for AIDS Education* 2016;28(4):341-50. doi: 10.1521/aeap.2016.28.4.341 [published Online First: 2016/07/20]
  112. Jeon JH. Evaluation of a smartphone application for self-care performance of patients with chronic hepatitis B: A randomized controlled trial. *Applied nursing research : ANR* 2016;32:182-89. doi: 10.1016/j.apnr.2016.07.011 [published Online First: 2016/12/15]
  113. Polilli E, Sozio F, Di Stefano P, et al. Web-Based HIV Testing in Abruzzo, Italy: Analysis of 15-Month Activity Results. *AIDS Patient Care STDS* 2016;30(10):471-75. doi: 10.1089/apc.2016.0082
  114. Przybyła SM, Eliseo-Arras RK, Krawiec G, et al. Feasibility and Acceptability of a Smartphone App for Daily Reports of Substance Use and Antiretroviral Therapy Adherence among HIV-Infected



- Adults. *AIDS research and treatment* 2016;2016:9510172. doi: 10.1155/2016/9510172 [published Online First: 2016/09/10]
115. Rhodes SD, McCoy TP, Tanner AE, et al. Using Social Media to Increase HIV Testing Among Gay and Bisexual Men, Other Men Who Have Sex With Men, and Transgender Persons: Outcomes From a Randomized Community Trial. *Clinical infectious diseases : an official publication of the Infectious Diseases Society of America* 2016;62(11):1450-3. doi: 10.1093/cid/ciw127 [published Online First: 2016/03/17]
116. Rosengren AL, Huang E, Daniels J, et al. Feasibility of using Grindr™ to distribute HIV self-test kits to men who have sex with men in Los Angeles, California. *Sexual health* 2016 doi: 10.1071/sh15236 [published Online First: 2016/05/23]
117. Solorio R, Norton-Shelpuk P, Forehand M, et al. Tu Amigo Pepe: Evaluation of a Multi-media Marketing Campaign that Targets Young Latino Immigrant MSM with HIV Testing Messages. *AIDS Behav* 2016;20(9):1973-88. doi: 10.1007/s10461-015-1277-6 [published Online First: 2016/02/07]
118. Talal AH, Andrews P, McLeod A, et al. Telemedicine-based Hepatitis C Virus (HCV) management for individuals on opioid agonist treatment (OAT). *Hepatology* 2016;63 (1 Supplement 1):475A.
119. Henwood R, Patten G, Barnett W, et al. Acceptability and use of a virtual support group for HIV-positive youth in Khayelitsha, Cape Town using the MXit social networking platform. *AIDS care* 2016;28(7):898-903. doi: 10.1080/09540121.2016.1173638 [published Online First: 2016/04/22]
120. Brayboy LM, Sepolen A, Mezoian T, et al. Girl Talk: A Smartphone Application to Teach Sexual Health Education to Adolescent Girls. *J Pediatr Adolesc Gynecol* 2017;30(1):23-28. doi: 10.1016/j.jpag.2016.06.011 [published Online First: 2016/07/10]
121. Horvath KJ, Oakes JM, Rosser BR, et al. Feasibility, acceptability and preliminary efficacy of an online peer-to-peer social support ART adherence intervention. *AIDS Behav* 2013;17(6):2031-44. doi: 10.1007/s10461-013-0469-1 [published Online First: 2013/04/05]
122. Gotz HM, van Rooijen MS, Vriens P, et al. Initial evaluation of use of an online partner notification tool for STI, called 'suggest a test': a cross sectional pilot study. *Sex Transm Infect* 2014;90(3):195-200. doi: sextrans-2013-051254 [pii] 10.1136/sextrans-2013-051254 [published Online First: 2014/01/07]
123. Friedman AL, Brookmeyer KA, Kachur RE, et al. An assessment of the GYT: Get Yourself Tested campaign: an integrated approach to sexually transmitted disease prevention communication. *Sex Transm Dis* 2014;41(3):151-7. doi: 10.1097/OLQ.0000000000001000007435-201403000-00001 [pii] [published Online First: 2014/02/14]
124. Hightow-Weidman LB, Muessig KE, Pike EC, et al. HealthMpowerment.org: Building Community Through a Mobile-Optimized, Online Health Promotion Intervention. *Health Educ Behav* 2015;42(4):493-9. doi: 1090198114562043 [pii] 10.1177/1090198114562043 [published Online First: 2015/01/16]
125. Dokkum NF, Koekenbier RH, van den Broek IV, et al. Keeping participants on board: increasing uptake by automated respondent reminders in an Internet-based chlamydia screening in the Netherlands. *BMC Public Health* 2012;12:176. doi: 1471-2458-12-176 [pii] 10.1186/1471-2458-12-176 [published Online First: 2012/03/13]
126. Hightow-Weidman L, Beagle S, Pike E, et al. "No one's at home and they won't pick up the phone": using the Internet and text messaging to enhance partner services in North Carolina. *Sex Transm Dis* 2014;41(2):143-8. doi: 10.1097/OLQ.0000000000000087 00007435-201402000-00014 [pii] [published Online First: 2014/01/15]
127. Aronson ID, Cleland CM, Perlman DC, et al. MOBILE SCREENING TO IDENTIFY AND FOLLOW-UP WITH HIGH RISK, HIV NEGATIVE YOUTH. *Journal of mobile technology in medicine* 2016;5(1):9-18. doi: 10.7309/jmtm.5.1.3 [published Online First: 2016/04/26]
128. Hirsch-Moverman Y, Daftary A, Yuengling KA, et al. Using mHealth for HIV/TB Treatment Support in Lesotho: Enhancing Patient-Provider Communication in the START Study. *J Acquir*

- 1  
2  
3  
4  
5  
6  
7  
8  
9  
10  
11  
12  
13  
14  
15  
16  
17  
18  
19  
20  
21  
22  
23  
24  
25  
26  
27  
28  
29  
30  
31  
32  
33  
34  
35  
36  
37  
38  
39  
40  
41  
42  
43  
44  
45  
46  
47  
48  
49  
50  
51  
52  
53  
54  
55  
56  
57  
58  
59  
60
- Immune Defic Syndr* 2017;74 Suppl 1:S37-S43. doi: 10.1097/qai.0000000000001202 [published Online First: 2016/12/09]
129. John ME, Samson-Akpan PE, Etowa JB, et al. Enhancing self-care, adjustment and engagement through mobile phones in youth with HIV. *International nursing review* 2016;63(4):555-61. doi: 10.1111/inr.12313 [published Online First: 2016/09/23]
130. Guy R, Hocking J, Wand H, et al. How effective are short message service reminders at increasing clinic attendance? A meta-analysis and systematic review. *Health Serv Res* 2012;47(2):614-32. doi: 10.1111/j.1475-6773.2011.01342.x [published Online First: 2011/11/19]
131. Free C, Phillips G, Galli L, et al. The effectiveness of mobile-health technology-based health behaviour change or disease management interventions for health care consumers: a systematic review. *PLoS Med* 2013;10(1):e1001362. doi: 10.1371/journal.pmed.1001362  
PMEDICINE-D-12-00520 [pii] [published Online First: 2013/01/26]
132. Ershad Sarabi R, Sadoughi F, Jamshidi Orak R, et al. The Effectiveness of Mobile Phone Text Messaging in Improving Medication Adherence for Patients with Chronic Diseases: A Systematic Review. *Iranian Red Crescent medical journal* 2016;18(5):e25183. doi: 10.5812/ircmj.25183 [published Online First: 2016/07/21]
133. Finitis DJ, Pellowski JA, Huedo-Medina TB, et al. Visual analogue scale (VAS) measurement of antiretroviral adherence in people living with HIV (PLWH): a meta-analysis. *Journal of behavioral medicine* 2016;39(6):1043-55. doi: 10.1007/s10865-016-9770-6 [published Online First: 2016/08/03]
134. Kanters S, Park JJ, Chan K, et al. Interventions to improve adherence to antiretroviral therapy: a systematic review and network meta-analysis. *The lancet HIV* 2017;4(1):e31-e40. doi: 10.1016/s2352-3018(16)30206-5 [published Online First: 2016/11/20]
135. Mayer JE, Fontelo P. Meta-analysis on the effect of text message reminders for HIV-related compliance. *AIDS care* 2016:1-9. doi: 10.1080/09540121.2016.1214674 [published Online First: 2016/08/02]
136. Thakkar J, Kurup R, Laba TL, et al. Mobile telephone text messaging for medication adherence in chronic disease a meta-analysis. *JAMA Intern Med* 2016;176(3):340-49. doi: 10.1001/jamainternmed.2015.7667
137. Mbuagbaw L, Mursleen S, Lytvyn L, et al. Mobile phone text messaging interventions for HIV and other chronic diseases: an overview of systematic reviews and framework for evidence transfer. *BMC Health Serv Res* 2015;15:33. doi: 10.1186/s12913-014-0654-6  
s12913-014-0654-6 [pii] [published Online First: 2015/01/23]
138. Muessig KE, Nekkanti M, Bauermeister J, et al. A Systematic Review of Recent Smartphone, Internet and Web 2.0 Interventions to Address the HIV Continuum of Care. *Curr Hiv/Aids Rep* 2015;12(1):173-90. doi: 10.1007/s11904-014-0239-3
139. Gabarron E, Wynn R. Use of social media for sexual health promotion: a scoping review. *Global health action* 2016;9:32193. doi: 10.3402/gha.v9.32193 [published Online First: 2016/09/22]
140. Chavez NR, Shearer LS, Rosenthal SL. Use of digital media technology for primary prevention of STIs/HIV in youth. *J Pediatr Adolesc Gynecol* 2014;27(5):244-57. doi: 10.1016/j.jpag.2013.07.008 [published Online First: 2013/12/18]
141. Barello S, Triberti S, Graffigna G, et al. eHealth for Patient Engagement: A Systematic Review. *Front Psychol* 2015;6:2013. doi: 10.3389/fpsyg.2015.02013 [published Online First: 2016/01/19]
142. Finitis DJ, Pellowski JA, Johnson BT. Text Message Intervention Designs to Promote Adherence to Antiretroviral Therapy (ART): A Meta-Analysis of Randomized Controlled Trials. *PLoS ONE* 2014;9(2) doi: e88166  
10.1371/journal.pone.0088166
143. Fletcher WR, Fletcher WS. Chapter 8: Treatment. *Clinical Epidemiology: The Essentials*. 4th ed. Baltimore: Lippincott Williams & Wilkins 2005:141.

- 1  
2  
3  
4  
5  
6  
7  
8  
9  
10  
11  
12  
13  
14  
15  
16  
17  
18  
19  
20  
21  
22  
23  
24  
25  
26  
27  
28  
29  
30  
31  
32  
33  
34  
35  
36  
37  
38  
39  
40  
41  
42  
43  
44  
45  
46  
47  
48  
49  
50  
51  
52  
53  
54  
55  
56  
57  
58  
59  
60
144. Agarwal S, LeFevre AE, Lee J, et al. Guidelines for reporting of health interventions using mobile phones: mobile health (mHealth) evidence reporting and assessment (mERA) checklist. *BMJ* 2016;352:i1174. [published Online First: 2016/03/19]

For peer review only

1  
2  
3  
4  
5  
6  
7  
8  
9  
10  
11  
12  
13  
14  
15  
16  
17  
18  
19  
20  
21  
22  
23  
24  
25  
26  
27  
28  
29  
30  
31  
32  
33  
34  
35  
36  
37  
38  
39  
40  
41  
42  
43  
44  
45  
46  
47  
48  
49  
50  
51  
52  
53  
54  
55  
56  
57  
58  
59  
60

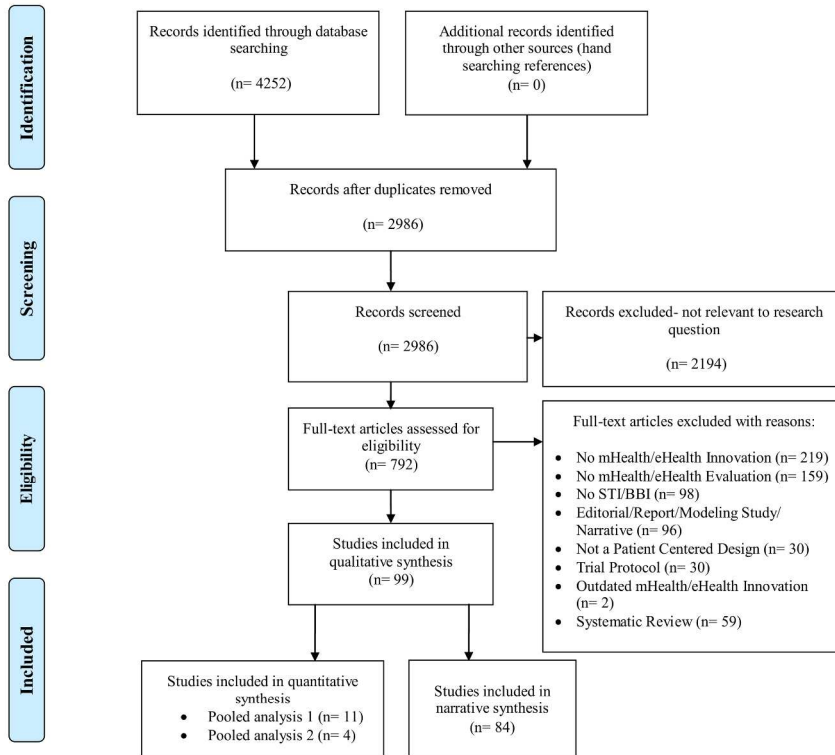

Figure 1. PRISMA Flow Diagram

215x279mm (300 x 300 DPI)

1  
2  
3  
4  
5  
6  
7  
8  
9  
10  
11  
12  
13  
14  
15  
16  
17  
18  
19  
20  
21  
22  
23  
24  
25  
26  
27  
28  
29  
30  
31  
32  
33  
34  
35  
36  
37  
38  
39  
40  
41  
42  
43  
44  
45  
46  
47  
48  
49  
50  
51  
52  
53  
54  
55  
56  
57  
58  
59  
60

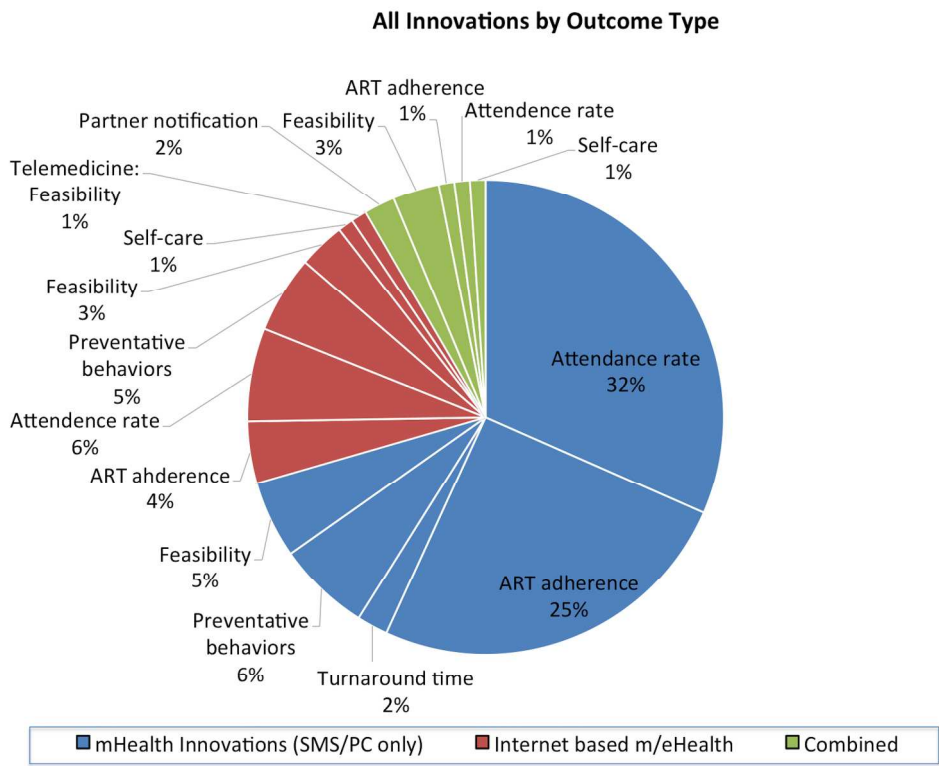

Figure 2. All Innovations by Outcome Type

279x215mm (300 x 300 DPI)

1  
2  
3  
4  
5  
6  
7  
8  
9  
10  
11  
12  
13  
14  
15  
16  
17  
18  
19  
20  
21  
22  
23  
24  
25  
26  
27  
28  
29  
30  
31  
32  
33  
34  
35  
36  
37  
38  
39  
40  
41  
42  
43  
44  
45  
46  
47  
48  
49  
50  
51  
52  
53  
54  
55  
56  
57  
58  
59  
60



Figure 3A. Sub-Group Analysis Pooled OR for Attendance



Figure 3B. Sub-Group Analysis Pooled OR for Adherence

Figure 3. Sub-Group Analyses

215x279mm (300 x 300 DPI)



## Appendix 1: Search Strategy.

|                                                                                                                                                                                                                                                                                                                                                                                                                                                                                                                            |                                                                                                                                                                                                                                                                                                                                                                                                                                                                                                                                                                                                                                                                                                                                                                                                                                                                                                                                                                                                                                                                                                                                                                                                                                                                                                                                                                                                                                                                                                                                                                                                                                                                                                                                                                                                                                                                                                                                                              |
|----------------------------------------------------------------------------------------------------------------------------------------------------------------------------------------------------------------------------------------------------------------------------------------------------------------------------------------------------------------------------------------------------------------------------------------------------------------------------------------------------------------------------|--------------------------------------------------------------------------------------------------------------------------------------------------------------------------------------------------------------------------------------------------------------------------------------------------------------------------------------------------------------------------------------------------------------------------------------------------------------------------------------------------------------------------------------------------------------------------------------------------------------------------------------------------------------------------------------------------------------------------------------------------------------------------------------------------------------------------------------------------------------------------------------------------------------------------------------------------------------------------------------------------------------------------------------------------------------------------------------------------------------------------------------------------------------------------------------------------------------------------------------------------------------------------------------------------------------------------------------------------------------------------------------------------------------------------------------------------------------------------------------------------------------------------------------------------------------------------------------------------------------------------------------------------------------------------------------------------------------------------------------------------------------------------------------------------------------------------------------------------------------------------------------------------------------------------------------------------------------|
| Search #1                                                                                                                                                                                                                                                                                                                                                                                                                                                                                                                  | "HIV Infections"[Mesh] OR "HIV" [MeSH] OR "human immunodeficiency virus"[tiab] OR "human immuno deficiency virus"[tiab] OR "human immune deficiency virus"[tiab] OR "human immunodeficiency virus"[tiab] OR "aids"[tiab] OR "acquired immunodeficiency syndrome"[tiab] OR "acquired immunodeficiency syndromes"[tiab] OR "acquired immuno deficiency syndrome"[tiab] OR "acquired immune deficiency syndromes"[tiab] OR "acquired immune deficiency syndromes"[tiab] OR "acquired immunodeficiency syndrome"[tiab] OR "acquired immunodeficiency syndromes"[tiab]                                                                                                                                                                                                                                                                                                                                                                                                                                                                                                                                                                                                                                                                                                                                                                                                                                                                                                                                                                                                                                                                                                                                                                                                                                                                                                                                                                                            |
| Search #2                                                                                                                                                                                                                                                                                                                                                                                                                                                                                                                  | "mHealth" [tiab] OR "telemedicine"[MeSH] OR telemedicine[tiab] OR eHealth[MeSH] OR ehealth[tiab] OR "mobile health" [tiab] OR "mobile technology"[tiab] OR "app"[tiab] OR "apps"[tiab] OR "mobile applications" OR social medi*[tiab] OR cell phone* [tiab] OR cellphone*[tiab] OR "cellular phone"[mesh] OR cellular phone*[tiab] OR smartphone*[tiab] OR smart phone*[tiab] OR mobile phone[tiab] OR mobile device*[tiab] OR cellular telephone*[tiab] OR mobile telephone*[tiab] OR text messag*[tiab] OR texting[tiab] OR texted[tiab] OR SMS[tiab] OR MMS[tiab] OR multimedia messag*[tiab] OR short messag*[tiab] OR "computers, handheld"[mesh] OR personal digital assistant*[tiab]                                                                                                                                                                                                                                                                                                                                                                                                                                                                                                                                                                                                                                                                                                                                                                                                                                                                                                                                                                                                                                                                                                                                                                                                                                                                  |
| Search #3 [1,2]<br>References<br>1.Ferreira A, Young T, Mathews C, Zunza M, Low N. Strategies for partner notification for sexually transmitted infections, including HIV. Cochrane Database of Systematic Reviews 2013, Issue 10. Art. No.: CD002843. DOI: 10.1002/14651858.CD002843.pub2<br>2.Obiero J, Mwethera PG, Wiysonge CS. Topical microbicides for prevention of sexually transmitted infections. Cochrane Database of Systematic Reviews 2012, Issue 6. Art. No.: CD007961. DOI: 10.1002/14651858.CD007961.pub2 | sexually transmitted infections[mh] OR sexually transmitted disease*[tiab] OR sexually transmissible disease*[tiab] OR sexually transmitted infection*[tiab] OR sexually transmissible infection*[tiab] OR sexually transmitted infectious disease*[tiab] OR sexually transmissible infectious disease*[tiab] OR sexually transmitted disorder*[tiab] OR sexually transmissible disorder*[tiab] OR STI[tiab] OR STIs[tiab] OR STD[tiab] OR STIs[tiab] OR venereal disease*[tiab] OR venereal infection*[tiab] OR venereal disorder*[tiab] OR genital herpes[tiab] OR herpes genitalis[mh] OR herpes genitalis[tiab] OR genital infection*[tiab] OR genital disorder*[tiab] OR herpes simplex[tiab] OR herpes virus[tiab] OR HSV-1[tiab] OR HSV-2[tiab] OR chancroid[mh] OR chancroid* [tiab] OR haemophilus ducreyi[tiab] OR chlamydia infection*[tiab] OR chlamydia trachomatis[mh] OR chlamydia trachomatis[tiab] OR gonorrhoea[mh] OR gonorrhoea*[tiab] OR gonorrhoea*[tiab] OR syphilis[mh] OR syphilis[tiab] OR cuminat[tiab] OR condylomata lata[tiab] OR chancre*[tiab] OR lymphogranuloma venereum[mh] OR lymphogranuloma venereum[tiab] OR granuloma Inguinale[mh] OR granuloma inguinale[tiab] OR donovania[tiab] OR donovanosis[tiab] OR calymmatobacterium[mh] OR calymmatobacterium granulomatis[tiab] OR klebsiella granulomatis[tiab] OR klebsiella granulomatis[tiab] OR treponema pallidum[mh] OR treponema pallidum[tiab] OR genital wart*[tiab] OR venereal wart*[tiab] OR condylomata cuminate[mh] OR human papillomavirus 6[mh] OR hpv-6[tiab] OR hpv-11[tiab] OR hpv6[tiab] OR human papillomavirus[tiab] OR hepatitis b[mh] OR hepatitis b[tiab] OR trichomonas vaginitis[mh] OR trichomonas vaginitis[tiab] OR genital ulcer*[tiab] OR anogenital ulcer*[tiab] OR anorectal ulcer*[tiab] OR anorectal ulcer*[tiab] OR penile ulcer*[tiab] OR blood-borne pathogen*[tiab] OR blood-borne infection*[tiab] OR blood-borne virus*[tiab] |
| Search #4                                                                                                                                                                                                                                                                                                                                                                                                                                                                                                                  | #1 OR #3                                                                                                                                                                                                                                                                                                                                                                                                                                                                                                                                                                                                                                                                                                                                                                                                                                                                                                                                                                                                                                                                                                                                                                                                                                                                                                                                                                                                                                                                                                                                                                                                                                                                                                                                                                                                                                                                                                                                                     |
| Search #5                                                                                                                                                                                                                                                                                                                                                                                                                                                                                                                  | #2 AND #4                                                                                                                                                                                                                                                                                                                                                                                                                                                                                                                                                                                                                                                                                                                                                                                                                                                                                                                                                                                                                                                                                                                                                                                                                                                                                                                                                                                                                                                                                                                                                                                                                                                                                                                                                                                                                                                                                                                                                    |

## Appendix 2: Abstraction table.

| Combined Innovations                         | Author               | Study Design                                   | Participants/<br>Country                                  | STBBI             | Intervention                                                                                          | Measure/Metric                                                                                                                                                                               | Results (MD=Mean difference, RR=risk ratio, IRR=incidence rate ratio, HR=hazard ratio, SD= standard deviation, 95% CI when presented. M=months, W=weeks)                                                                                                                                                                                                                                                                                                                        |
|----------------------------------------------|----------------------|------------------------------------------------|-----------------------------------------------------------|-------------------|-------------------------------------------------------------------------------------------------------|----------------------------------------------------------------------------------------------------------------------------------------------------------------------------------------------|---------------------------------------------------------------------------------------------------------------------------------------------------------------------------------------------------------------------------------------------------------------------------------------------------------------------------------------------------------------------------------------------------------------------------------------------------------------------------------|
| Online campaign + SMS + TV.                  | Friedman 2014        | Quasi-experimental: HxCtrl w/ population data. | ≤25 yrs, USA. n=N/A                                       | HIV, CT, GC       | GetYourselfTested: TV campaign w/ website & SMS service for STI info & clinic locator.                | ATT testing: Attendance rate.<br>Acceptability: Number of followers.<br>Feasibility: Referral rate.                                                                                          | 41.2% more CT tests in 2010 vs. 2008, 90.5% more GC tests, and 190.3% more HIV tests.<br>4477 FB followers and 1994 Twitter followers at yr 2.<br>83,404 referrals using clinic locator in yr1. 61,119 in yr2.                                                                                                                                                                                                                                                                  |
| Interactive website + SMS + cash incentives. | Horvath 2013         | RCT                                            | HIV+ Gay/Bi-sexual men 18+ yrs, USA. n=67(Int) n=57(Ctrl) | HIV               | Online self-monitoring system w/ interactive interface + optional SMS reminders +\$25 gift card draw. | ART in PVLA: Self-report.<br>[Difference scores: DS = FU-baseline]<br>ART in PVLA: Self-report.<br>ART in PVLA: Self-report.<br>Acceptability: Self-report.<br>Feasibility: Completion rate. | No difference. (DS=0.54, SD=25.2 vs. DS=-3.2, SD=24.5; t(107)=1.79, p=0.43) / No impact.<br>Increased adherence in drug users (DS= 7.1, SD= 22.1 vs. DS= -24, SD= 30.5; t(17)=2.52, p=0.02) / Effective.<br>Trend to taking meds within 2hrs of scheduled dose. DS=6.6, SD=29.3 vs. DS=-3, SD=29.6; t(105)=1.68, p=0.1 / No impact.<br>Mean score = 5.7 on 7-point Likert Scale for satisfaction / Highly acceptable.<br>Completion rate 88% vs. 93% in Ctrl / Highly feasible. |
| Website + SMS                                | Gotz 2014            | Cross-sectional study.                         | STI index patients at clinic, NLD. n=988                  | HIV, CT, GC, syph | Suggestatest.nl: online partner notification via SMS/email.                                           | PN: % partners notified.                                                                                                                                                                     | 14% notifications via SAT. 505 notifications sent (84% by SMS, 15% by email). 56% read notification. 20% visited one of 2 STI clinics.                                                                                                                                                                                                                                                                                                                                          |
| Social media + SMS.                          | Hightow-Weidman 2014 | Quasi-experimental: HxCtrl.                    | HIV+ or syphilis+ patients, USA. n=362(Int) n=133(HxCtrl) | HIV, syphilis     | Notification on social networking sites + SMS                                                         | PN: % partners notified.                                                                                                                                                                     | 63.5% of contacts notified via internet in 2011 vs. 26% in 2010.                                                                                                                                                                                                                                                                                                                                                                                                                |
| PC/SMS/MMS + WhatsApp messages               | John 2016            | UnCtrlled trial.                               | HIV+ non-disclosed, 15-29 yrs, NGA. n=19                  | HIV               | Weekly counselling, educational & motivational calls, SMS/MMS and WhatsApp messages over 3M.          | Self-care: Self-report.                                                                                                                                                                      | Significant increase in self-care performance at 6MI (p=0.002)/ Effective.                                                                                                                                                                                                                                                                                                                                                                                                      |
| Interactive website + SMS                    | Hightow-Weidman 2015 | Feasibility study.                             | Black MSM & transwomen 18-30 yrs, USA. n=15               | HIV               | HealthMpowerment.org: online community networking Int to reduce STI risk + health promotion messages. | Acceptability: Self-report.<br>Feasibility: Retention rate.                                                                                                                                  | 86.7%-100% strongly agreed w/ acceptability questions / Highly acceptable.<br>100% retention rate. 7/15 participants used the site 1W after study ended / Highly feasible.                                                                                                                                                                                                                                                                                                      |
| Mobile app + SMS                             | Hirsch-Moverman 2017 | Feasibility study.                             | ≥18yrs, HIV+/TB, LSO. n=171                               | HIV/TB            | CommCare application used to automatically send SMS medication reminders over 29M                     | Acceptability: Self-report.                                                                                                                                                                  | 41.9% think SMS facilitated adherence to TB /ART medication / Less acceptable.                                                                                                                                                                                                                                                                                                                                                                                                  |

|   |                         |              |                   |                                                   |     |                                                                              |                               |                                                                                                                                                                          |
|---|-------------------------|--------------|-------------------|---------------------------------------------------|-----|------------------------------------------------------------------------------|-------------------------------|--------------------------------------------------------------------------------------------------------------------------------------------------------------------------|
| 1 | <b>Mobile app + SMS</b> | Aronson 2016 | Feasibility study | 18-24 yrs, USA.<br>n=100                          | HIV | App assessing risk and sending SMS to encourage re-testing of HIV negatives. | Feasibility: Completion rate  | 98/100 completed the app process/ Highly feasible<br>30/100 accepted to receive HIV test<br>21/30 accepted to receive SMS<br>1/21 re-tested after 90 days window period. |
| 2 |                         |              |                   |                                                   |     |                                                                              |                               |                                                                                                                                                                          |
| 3 | <b>Website + SMS</b>    | Dokkum 2012  | UnCtrlled trial.  | 16-29 yrs, NLD.<br>n=52600(Rd 1)<br>n=41700(Rd 2) | CT  | At-home CT test + SMS/email to return test for analysis.                     | Feasibility: Completion rate. | Higher retesting rates (From 10% w/o reminders to 14% in round 1; from 7% to 10% in round 2) / Less feasible.                                                            |
| 4 |                         |              |                   |                                                   |     |                                                                              |                               |                                                                                                                                                                          |
| 5 |                         |              |                   |                                                   |     |                                                                              |                               |                                                                                                                                                                          |
| 6 |                         |              |                   |                                                   |     |                                                                              |                               |                                                                                                                                                                          |

7 **Note:** Int= intervention; Ctrl= control; HxCtrl= historical control; PB= preventative behaviors (i.e. risk reduction); PN= partner notification; TAT= turnaround time; ATT= attendance rate; ART= ART adherence; NAPs= non-adherent patients; AP= adherent patients; PVLA= Patients with various levels of adherence; TNPs= Treatment naive patients; VL= viral load; CD4= CD4 cell count; PC= phone call; FB= Facebook.

For peer review only

10  
11  
12  
13  
14  
15  
16  
17  
18  
19  
20  
21  
22  
23  
24  
25  
26  
27  
28  
29  
30  
31  
32  
33  
34  
35  
36  
37  
38  
39  
40  
41  
42  
43  
44  
45  
46  
47  
48  
49

| Internet-based eHealth Innovation                                                                              | Author                                            | Study Design                                   | Participants/ Country                                                 | STBBI                 | Intervention                                                                                                                                    | Measure/Metric                                                                                           | Results (MD=Mean difference, RR=risk ratio, IRR=incidence rate ratio, HR=hazard ratio, SD= standard deviation, 95% CI when presented. M=months, W=weeks)                                                                                                                                                                                                                                                                         |
|----------------------------------------------------------------------------------------------------------------|---------------------------------------------------|------------------------------------------------|-----------------------------------------------------------------------|-----------------------|-------------------------------------------------------------------------------------------------------------------------------------------------|----------------------------------------------------------------------------------------------------------|----------------------------------------------------------------------------------------------------------------------------------------------------------------------------------------------------------------------------------------------------------------------------------------------------------------------------------------------------------------------------------------------------------------------------------|
| 1<br>2<br>3<br>4<br>5<br>6<br>7<br>8<br>9<br>10<br>11<br>12                                                    | Online campaign<br>Downshen 2015                  | Quasi-experimental: HxCtrl w/ population data. | 13-17 yrs, USA. n=1500                                                | HIV, CT, GC, syphilis | IknowUshould2: social-media campaign w/ website for STI info & clinic locator.                                                                  | ATT testing: Attendance rate.<br>Acceptability: Number of followers.                                     | More syphilis tests (18.8% vs. 5.4%; p<0.01) and HIV tests (19.0% vs. 5.4%; p<0.01). No change for CT & GC / Effective.<br>1500+ unique website interactions. 128 FB likes; 46 Twitter followers; 390 Youtube views; 42 Instagram followers.                                                                                                                                                                                     |
| 13<br>14<br>15<br>16<br>17<br>18<br>19                                                                         | Social media campaign<br>Elliot 2016              | Cross-sectional study.                         | MSM, GBR. n=17361                                                     | HIV                   | Promotion through Gaydar, Grindr, Recon and FB pages to order free postal HIV home sampling kits                                                | ATT testing: Participation rate.<br>Acceptability: Self-report.                                          | 10 323/11 127 (93%) ordered HIV sample kit. 5696/10 323 (55%) returned sample kit within 24M. 82/5696 (1.4%) confirmed new diagnosis and in care.<br>59.7% would recommend to someone expected to test positive (93.8% if expected to negative). 64% clicked for more info on test. / Moderately acceptable.                                                                                                                     |
| 20<br>21<br>22<br>23<br>24<br>25<br>26<br>27                                                                   | Social media campaign<br>Huang 2016               | Cross-sectional                                | ≥18yrs, Black/African American or Hispanic/Latino MSM, USA. n=122     | HIV                   | Promoting of HIV self-testing for 6W on Grindr + study website to order self-test kit                                                           | ATT testing: Participation rate.<br>Acceptability: Number of followers<br>Feasibility: Completion rate.  | 122 requested tests; 55/57 HIV-, 2/57 HIV+.<br>11 939 unique website visitors; 2.8% click-through rate<br>334 tests requested.<br>122/334 visitors were eligible and completed baseline survey, 81/122 confirmed receiving self test kit, 57/122 completed follow-up survey / Less feasible.                                                                                                                                     |
| 28<br>29<br>30<br>31<br>32<br>33<br>34<br>35<br>36<br>37<br>38<br>39<br>40<br>41<br>42<br>43<br>44<br>45<br>46 | Social media campaign<br>Jones 2015               | Cross-sectional study.                         | MSM, GBR. n=305                                                       | HIV                   | Health promotion and offer of rapid at-home testing via FB, Grindr, and Squirt.                                                                 | ATT testing: Participation rate.<br>Acceptability: Number of followers.<br>Feasibility: Completion rate. | 5/5 high risk sexual behavior but tested HIV negative; 1/5 never tested before; 3/5 not tested in many yrs.<br>103 clicked FB survey; 152 approached on Grindr; 50 Squirt contacts.<br>FB: 6/103 completed survey; 3/6 requested HIV test; 2/3 made appointment. Grindr: 20/152 engaged; 6/20 requests for at home test; 3/6 made appointment. Squirt: 3/50 engaged and 0/3 test requests / Less feasible.                       |
| 47<br>48<br>49                                                                                                 | Social media campaign + website<br>Rhodes 2016    | Quasi-experimental.                            | MSM & transgender, USA n=339 (Int) n=286 (Ctrl)                       | HIV                   | Posting info and answering questions on HIV testing on social media sites (Adam4Adam, BlackGayChat, Craigslist, and Gay.com).                   | ATT testing: Self-report.                                                                                | 63.7% of intervention participants reported past 12M HIV testing compared with 42.0% of control.<br>Adjusted OR= 2.9 (1.8-4.7)/ Effective.                                                                                                                                                                                                                                                                                       |
|                                                                                                                | Social media campaign + website<br>Rosengren 2016 | Cross-sectional                                | Black or Hispanic MSM 18+ yrs, USA n=56                               | HIV                   | Promotion of free rapid HIV self-testing kits on Grindr and offer of delivery via study website (kit, voucher or pin for smart vending machine) | ATT testing: Self-report.<br>Feasibility: Completion rate.<br>ART in TNPs: Self-report.                  | All 56 reported testing completion (100%); 2/56 reported positive result and linkage to care (confirmatory testing and ART initiation)<br>4389 visited the website; 333 requested test (i.e. 1 in 13 visitors); 56 completed survey 2W after request/ Less feasible.<br>Higher adherence at 3M & 6M (71.2% vs. 63.9%, d=0.17; 70.3% vs. 66.6%, d=0.09)                                                                           |
|                                                                                                                | Mobile phone application<br>Himelhoch 2016        | RCT                                            | 18-64yrs, history of drug/alcohol use, HIV+, USA. n=19(Int) n=9(Ctrl) | HIV                   | Heart2HAART mobile application for ART adherence                                                                                                | ART in NAPs: Pill count<br>Acceptability: Self-report.<br>Feasibility: Response rate.                    | No significant difference in adherence between intervention and control group (p=0.29), but adherence was 100% in both at 3M / No impact<br>94.3% strongly agreed/agreed Heart2HAART helped them take their medication / Highly acceptable.<br>App was used on avg 21.4, 19.1 and 16.4 times in months 1, 2 and 3. Participants responded to medication prompts on avg 18, 16 and 14 times during months 1,2 and 3 respectively. |

|                                                                |                                        |                         |                             |                                                                                     |     |                                                                                                                           |                                                                                                                                                                              |                                                                                                                                                                                                                                                                                                                                                                                                                                                                                                                                             |
|----------------------------------------------------------------|----------------------------------------|-------------------------|-----------------------------|-------------------------------------------------------------------------------------|-----|---------------------------------------------------------------------------------------------------------------------------|------------------------------------------------------------------------------------------------------------------------------------------------------------------------------|---------------------------------------------------------------------------------------------------------------------------------------------------------------------------------------------------------------------------------------------------------------------------------------------------------------------------------------------------------------------------------------------------------------------------------------------------------------------------------------------------------------------------------------------|
| 1<br>2<br>3<br>4<br>5<br>6<br>7<br>8<br>9<br>10<br>11          | <b>Avatar-guided computer software</b> | Kurth 2014              | RCT                         | HIV+ 18+ yrs, USA. n=120(Int) n=120(Ctrl)                                           | HIV | Audio narrated risk assessment, skill building videos, tailored feedback and printouts vs. computer risk assessment only. | ART in PVLA: VL.<br>ART in PVLA: Self-report.<br>PB: Self-report.<br>Acceptability: Self-report.<br>Feasibility: Retention rate.                                             | Non-significant change. (log10VL= -0.06(-0.4 to -0.3), p=0.74). Significant in subgroup w/ detectable VL at baseline (-0.73(-1.42 to -0.03), p=0.041) / No impact.<br>Increased adherence. (4.71(0.95- 8.48) increase vs. 1.39(6.03 to 3.24) decrease; p=0.046) / Effective.<br>Lower odds of HIV transmission (OR=0.46 (0.25-0.84), p=0.012) / Effective.<br>97% reported ease of use and high privacy; 99% satisfied w/ session length; 75% preferred it over human counsellor / Highly acceptable.<br>87.1% retention / Highly feasible. |
| 12<br>13<br>14<br>15<br>16<br>17                               | <b>Avatar-guided computer program</b>  | Naar-King 2012          | RCT                         | HIV+ 16-24 yrs, USA. n=36(Int) n=40(Ctrl)                                           | HIV | 2-D animated character delivering personalized health feedback vs. character giving nutrition info.                       | ART in TNPs: VL.<br>ART in TNPs: Self-report.<br>Acceptability: Self-report.                                                                                                 | Larger suppression rate. (Cohen's d=0.09 at 3M; d= 0.28 at 6M). Larger drop in VL from baseline (d=0.39 at 3M & d=0.19 at 6M).<br>Higher adherence at 3M & 6M (71.2% vs. 63.9%, d=0.17; 70.3% vs. 66.6%, d=0.09)<br>Mean satisfaction ratings 3.7 out of 4 / Highly acceptable.                                                                                                                                                                                                                                                             |
| 18<br>19<br>20<br>21<br>22<br>23<br>24<br>25<br>26<br>27<br>28 | <b>Mobile phone application</b>        | Perera 2014             | RCT                         | HIV+, NZ. n=17(Int) n=11(Ctrl)                                                      | HIV | ART adherence app w/ medication clock & graphs on disease-state vs. standard app (medication clock only)                  | ART in PVLA: Self-report.<br>ART in PVLA: Pharmacy refills.<br>ART in PVLA: VL.<br>ART in PVLA: Composite score (refills, VL, & self-report).<br>Acceptability: Self-report. | Increased adherence (F(1,23)=5.37, p=0.03) / Effective.<br>No difference. (F(1,25)=1.88, p=0.18) / No impact.<br>Lower VL at 3M (F(1,23)=5.62, p=0.023) / Effective.<br>Increased adherence (53% to 13%, X2(1,15)=6, p=0.03). No change in Ctrl (27% to 27%, X2(1,11)=0.00, p>0.99) / Effective.<br>More satisfying (on 11 point-scale: 5.88 vs. 3.27, p=0.017) and informative (6 vs. 3, p=0.034) at 3M than standard app / Highly acceptable.                                                                                             |
| 29<br>30<br>31<br>32                                           | <b>Mobile app + cash incentive</b>     | Brayboy 2017            | UnCtrlled trial.            | 12-17yrs, USA. n=17                                                                 | STI | GirlTalk mobile phone app to assess knowledge increase                                                                    | PB: Self-report.<br>Acceptability: Self-report.                                                                                                                              | 75.6% to 79% increase in knowledge pre and post app use at 2W. / No impact.<br>94.1% would use the app again/recommend it / Highly acceptable                                                                                                                                                                                                                                                                                                                                                                                               |
| 33<br>34<br>35                                                 | <b>Social media</b>                    | Jones 2012              | Quasi-experimental: HxCtrl. | 15-24 yrs, USA. n=70/896 FB friends                                                 | CT  | Educational FB site addressing safe sexual health.                                                                        | PB: Self-report.                                                                                                                                                             | Condom from 57% to 80%. 54% reduction in CT in ages 15-17 from previous yrs (but 42% less tests done).                                                                                                                                                                                                                                                                                                                                                                                                                                      |
| 36<br>37<br>38<br>39<br>40                                     | <b>Videos vs. SMS</b>                  | Jones 2013              | RCT                         | High-risk urban African-American women 18-29 yrs, USA. n=117(Soap opera) n=121(SMS) | HIV | Weekly soap opera episodes (Love, Sex & Choices) vs. HIV prevention SMS.                                                  | PB: Self-report.<br>Acceptability: Self-report.                                                                                                                              | 18% greater reduction in Int. group, p=0.23 / No impact.<br>78% reduction in risky acts from baseline in Int. group (p<0.001); 72% reduction from baseline in Ctrl (p<0.001)/ Effective<br>97.4% liked the videos / Highly acceptable.                                                                                                                                                                                                                                                                                                      |
| 41<br>42<br>43<br>44<br>45                                     | <b>Social media + video chat</b>       | Lelutiu-Weinberger 2014 | UnCtrlled trial.            | MSM 18-29 yrs, high risk for STI, USA. n=31                                         | HIV | miCHAT: FB chat Int. 8 motivational interviews to reduce HIV risk + CBT training.                                         | PB: Self-report.<br>Acceptability: Self-report.<br>Feasibility: Completion rate.                                                                                             | Decrease in unprotected anal sex acts (3.11 vs. 8.96; p=0.042).<br>Increased knowledge of sexual risk (p=0.01) / Effective.<br>All felt privacy was ensured / Highly acceptable.<br>46% completed baseline assessment + minimum 5 sessions / Less feasible.                                                                                                                                                                                                                                                                                 |

|    |                                                         |               |                    |                                                           |                         |                                                                                                                                                                    |                                                                |                                                                                                                                                                                                                                                                        |
|----|---------------------------------------------------------|---------------|--------------------|-----------------------------------------------------------|-------------------------|--------------------------------------------------------------------------------------------------------------------------------------------------------------------|----------------------------------------------------------------|------------------------------------------------------------------------------------------------------------------------------------------------------------------------------------------------------------------------------------------------------------------------|
| 1  | <b>Social media campaign + website + cash incentive</b> | Solorio 2016  | Feasibility study. | Hispanic MSM, 18-30 yrs, USA<br>n=50                      | HIV                     | Radio & social media-based campaign for 16W to encourage testing & condom use + website w/clinic locator to provide free HIV home testing kits and linkage to care | PB: self-report.<br>Feasibility: Self-report.                  | No significant change in condom use at 16W (26.1% vs. 15.65, OR=1.9 (0.6-5.9))/ No impact.<br>32/50 (64%) requested HIV home testing kit, 28/32 (88%) completed the test/ Moderately feasible.                                                                         |
| 2  |                                                         |               |                    |                                                           |                         |                                                                                                                                                                    |                                                                |                                                                                                                                                                                                                                                                        |
| 3  |                                                         |               |                    |                                                           |                         |                                                                                                                                                                    |                                                                |                                                                                                                                                                                                                                                                        |
| 4  |                                                         |               |                    |                                                           |                         |                                                                                                                                                                    |                                                                |                                                                                                                                                                                                                                                                        |
| 5  |                                                         |               |                    |                                                           |                         |                                                                                                                                                                    |                                                                |                                                                                                                                                                                                                                                                        |
| 6  | <b>Mobile app</b>                                       | Jeon 2016     | RCT.               | Chronic HBV+, 19-60 yrs, KOR<br>n=26 (Int)<br>n=27 (Ctrl) | HBV                     | App to increase disease knowledge, set alarm medication reminders, record lab nutrition & physical activity data, and chat with other users.                       | Self-care: Self-report.<br>Feasibility: Utilisation rate.      | Significantly higher self-care performance in intervention vs. control (t=3.597, p=0.001)/ Effective.<br>Average monthly utilisation rate was 75.1%/ Highly feasible.                                                                                                  |
| 7  |                                                         |               |                    |                                                           |                         |                                                                                                                                                                    |                                                                |                                                                                                                                                                                                                                                                        |
| 8  |                                                         |               |                    |                                                           |                         |                                                                                                                                                                    |                                                                |                                                                                                                                                                                                                                                                        |
| 9  |                                                         |               |                    |                                                           |                         |                                                                                                                                                                    |                                                                |                                                                                                                                                                                                                                                                        |
| 10 |                                                         |               |                    |                                                           |                         |                                                                                                                                                                    |                                                                |                                                                                                                                                                                                                                                                        |
| 11 |                                                         |               |                    |                                                           |                         |                                                                                                                                                                    |                                                                |                                                                                                                                                                                                                                                                        |
| 12 | <b>Social media</b>                                     | Henwood 2016  | Feasibility study. | 12-25 yrs, HIV+, ZAF<br>n=90                              | HIV                     | Use of MXit as support group for HIV+ youth                                                                                                                        | Acceptability: Self-report.<br>Feasibility: Participation rate | 84% would like chat-room to continue / Highly acceptable.<br>33% ever visited MXit chat-room / Less feasible.                                                                                                                                                          |
| 13 |                                                         |               |                    |                                                           |                         |                                                                                                                                                                    |                                                                |                                                                                                                                                                                                                                                                        |
| 14 |                                                         |               |                    |                                                           |                         |                                                                                                                                                                    |                                                                |                                                                                                                                                                                                                                                                        |
| 15 | <b>Mobile app + cash incentive</b>                      | Przybyla 2016 | Feasibility study. | HIV + on ART, 18+ yrs, USA<br>n=27                        | HIV                     | DRUM app to report daily on ART adherence and substance abuse.                                                                                                     | Acceptability: Self-report.<br>Feasibility: Completion rate.   | 84% reported the app was easy to use; 96% were satisfied; 92% would use it in the future/ Highly acceptable.<br>Overall completion rate of daily reports after 2W= 95.3%/ Highly feasible.                                                                             |
| 16 |                                                         |               |                    |                                                           |                         |                                                                                                                                                                    |                                                                |                                                                                                                                                                                                                                                                        |
| 17 |                                                         |               |                    |                                                           |                         |                                                                                                                                                                    |                                                                |                                                                                                                                                                                                                                                                        |
| 18 |                                                         |               |                    |                                                           |                         |                                                                                                                                                                    |                                                                |                                                                                                                                                                                                                                                                        |
| 19 | <b>Telemedicine</b>                                     | Talal 2016    | Feasibility study. | Individuals on opioid agonist tx, USA<br>n=54             | HCV                     | Telemedicine-based medical tx with hepatologist                                                                                                                    | Acceptability: Self-report.<br>Feasibility: Completion rate.   | 88.9% prefer medical tx using telemedicine vs. clinic visit; 100% would recommend it to a friend/ Highly acceptable.<br>54 tested HCV+ over 14M; 81.5% started evaluation/tx; 75% of those given tx have completed it/ Highly feasible.                                |
| 20 |                                                         |               |                    |                                                           |                         |                                                                                                                                                                    |                                                                |                                                                                                                                                                                                                                                                        |
| 21 |                                                         |               |                    |                                                           |                         |                                                                                                                                                                    |                                                                |                                                                                                                                                                                                                                                                        |
| 22 |                                                         |               |                    |                                                           |                         |                                                                                                                                                                    |                                                                |                                                                                                                                                                                                                                                                        |
| 23 | <b>Social media</b>                                     | Garett 2016   | Feasibility study. | 18+yrs, MSM, PER<br>n=102(Int)<br>n=109(Ctrl)             | HIV                     | 12W FB based peer-led intervention to increase HIV testing and prevention behaviour.                                                                               | Acceptability: Self-report.                                    | Intervention group felt they learned more about; where to receive sexual health services (p-value=0.0061), more likely to have safe sex (p-value=0.034) and more likely to get tested for HIV regularly (p-value=0.021) compared to control group / Highly acceptable. |
| 24 |                                                         |               |                    |                                                           |                         |                                                                                                                                                                    |                                                                |                                                                                                                                                                                                                                                                        |
| 25 |                                                         |               |                    |                                                           |                         |                                                                                                                                                                    |                                                                |                                                                                                                                                                                                                                                                        |
| 26 |                                                         |               |                    |                                                           |                         |                                                                                                                                                                    |                                                                |                                                                                                                                                                                                                                                                        |
| 27 | <b>Website</b>                                          | Polilli 2016  | Feasibility study. | Residents of Abruzzo Region, ITA<br>n=3500                | HIV, syphilis, HBV, HCV | Website with STI info, risk calculator, and appointments booking at testing sites.                                                                                 | Feasibility: Completion rate.                                  | 3500 booked an appointment; 3046 (87%) presented for testing within 15M study period/ Highly feasible.                                                                                                                                                                 |
| 28 |                                                         |               |                    |                                                           |                         |                                                                                                                                                                    |                                                                |                                                                                                                                                                                                                                                                        |
| 29 |                                                         |               |                    |                                                           |                         |                                                                                                                                                                    |                                                                |                                                                                                                                                                                                                                                                        |

30 **Note:** Int= intervention; Ctrl= control; HxCtrl= historical control; PB= preventative behaviors (i.e. risk reduction); PN= partner notification; TAT= turnaround time; ATT= attendance rate; ART= ART adherence; NAPs= non-adherent patients; AP= adherent patients; PVLA= Patients with various levels of adherence; TNPs= Treatment naive patients; VL= viral load; CD4= CD4 cell count; PC= phone call; FB= Facebook.



| Basic mHealth Innovation         | Author                            | Study Design                        | Participants/<br>Country                                                              | STBBI              | Intervention                                                                                                                                         | Measure/Metric                                                               | Results (MD=Mean difference, RR=risk ratio, IRR=incidence rate ratio, HR=hazard ratio, SD= standard deviation, 95% CI when presented. M=months, W=weeks)                                                                                                                                                 |
|----------------------------------|-----------------------------------|-------------------------------------|---------------------------------------------------------------------------------------|--------------------|------------------------------------------------------------------------------------------------------------------------------------------------------|------------------------------------------------------------------------------|----------------------------------------------------------------------------------------------------------------------------------------------------------------------------------------------------------------------------------------------------------------------------------------------------------|
| 1<br>2<br>3<br>4<br>5<br>6<br>7  | SMS Bailey 2014                   | UnCtrlled trial.                    | CT+ at clinic, AUS. n=64                                                              | CT                 | SMS reminders to recall for treatment.                                                                                                               | ATT treatment: Attendance rate.<br>Feasibility: Response rate.               | 100% treated for CT infection. 72% treated within 1 day of SMS.<br>94% replied to SMS, 84% the same day / Highly feasible.                                                                                                                                                                               |
| 8<br>9<br>10<br>11               | SMS + PC Bassett 2016             | RCT                                 | ≥18yrs, ZAF. n=543(Int) n=471(Ctrl)                                                   | HIV/TB             | 5 scheduled PC) and 4 SMS, reminders to retrieve test results and attend appointments, over 4M.                                                      | ATT treatment: Attendance rate.                                              | No significant difference in reaching outcome at 9M (3M ART treatment or 3+6M of TB treatment) between intervention and control (39% vs 42%, RR=0.93, 95%CI 0.80-1.08) / No Impact                                                                                                                       |
| 12<br>13<br>14<br>15<br>16<br>17 | SMS + PC Bigna 2014               | RCT                                 | Caregivers of HIV + children 18+ yrs, CMR. n=61(SMS+PC) n=60(PC) n=60(SMS) n=61(Ctrl) | HIV                | SMS+PC, SMS, or PC appointment reminders.                                                                                                            | ATT FU appointment: Attendance rate.                                         | Improved attendance. (OR=2.9 (1.3-6.3), p=0.012) / Effective.                                                                                                                                                                                                                                            |
| 18<br>19<br>20                   | SMS Brook 2013                    | Quasi-experimental: HxCtrl.         | Sexual health clinic, GBR. n=207(Int) n=169(HxCtrl)                                   | HIV, syphilis, HBV | SMS reminders.                                                                                                                                       | ATT testing: Attendance rate.                                                | Higher retesting rate (41% vs. 28%; p<0.001) / Effective.                                                                                                                                                                                                                                                |
| 21<br>22<br>23                   | SMS Brook 2013                    | Quasi-experimental: HxCtrl.         | Sexual health clinic, GBR. n=699(Int) n=768(HxCtrl)                                   | HIV                | SMS reminders 2 days before appointment.                                                                                                             | ATT FU appointment: LTFU rate.                                               | 35% improvement in overall LTFU rate (26% to 17%; p<0.0001) / Effective.                                                                                                                                                                                                                                 |
| 24<br>25<br>26<br>27             | SMS Burton 2013                   | Quasi-experimental: HxCtrl.         | High risk for STI at clinic, GBR. n=273(Int) n=266(Ctrl)                              | CT, GC             | SMS STI testing reminders.                                                                                                                           | ATT: testing: Attendance rate.                                               | No change in retesting rates for those w/ recent CT or GC. (CT: 36% vs.33%; p=0.79) (GC: 19% vs. 33%; p=0.48) / No impact.                                                                                                                                                                               |
| 28<br>29<br>30<br>31<br>32<br>33 | SMS Coleman 2017                  | Retrospective Quasi-experimental    | >=18 yrs, HIV+ pregnant women, ZAF. n=192(Int) n=447(Ctrl)                            | HIV                | Bi-weekly maternal health info sent throughout pregnancy and for one year after birth to increase HIV PCR testing postpartum and increase ANC visits | ATT testing: Attendance rate.<br>PB: Infection rate                          | 81.3% vs 75.4% in intervention vs control group likely to attend first PCR 6W postpartum. 40% increase in the likelihood of attending the recommended four ANC visits among individuals within the intervention group (RR: 1.41, CI: 1.15–1.72) / Effective.<br>3 infants born with HIV in control group |
| 34<br>35<br>36<br>37             | SMS Desai 2014                    | Quasi-experimental: Conc. + HxCtrl. | High risk MSM at clinic, GBR. n=31(Int) n=656(Conc. Ctrl) n=745(HxCtrl)               | HIV                | SMS HIV/STI testing reminders.                                                                                                                       | ATT testing: Attendance rate.                                                | No significant change in re-testing odds. (32% in SMS vs.30% in Conc. Ctrl; OR=1.1(0.5-2.4) and 17% in HxCtrl; OR=2.3(1.0-4.9) / No impact.                                                                                                                                                              |
| 38<br>39<br>40                   | SMS + cash incentive Downing 2013 | RCT                                 | CT + or suspected at clinic 16+ yrs, AUS. n=30(Int) n=32(Ctrl)                        | CT                 | SMS appointment reminders + \$10 if attended.                                                                                                        | ATT testing: Attendance rate.                                                | Increased re-testing rate at 10-12W post CT treatment (without cash 26.7% vs. 6.3% in Ctrl; p=0.04); (with cash 28.1% vs. 6.3% in Ctrl; p=0.043) / Effective.                                                                                                                                            |
| 41<br>42<br>43<br>44<br>45       | SMS Evans 2015                    | UnCtrlled trial.                    | African community, GBR. n=172                                                         | HIV                | 2 weekly Health Belief Model SMS to reduce risky sexual behaviours.                                                                                  | ATT testing: Self-report.<br>PB: Self-report.<br>Acceptability: Self-report. | 10.5% reported being tested for HIV during/after the 12W Int.<br>Non-significant increase in HIV knowledge & attitudes / No impact.<br>Acceptable & useful. Majority shared w/ others and want to get tested in future.                                                                                  |

|    |            |                              |                                        |                                                                                                                              |     |                                                                                                                      |                                                                                                                                  |                                                                                                                                                                                                                                                                                                                                                                                                                                                            |
|----|------------|------------------------------|----------------------------------------|------------------------------------------------------------------------------------------------------------------------------|-----|----------------------------------------------------------------------------------------------------------------------|----------------------------------------------------------------------------------------------------------------------------------|------------------------------------------------------------------------------------------------------------------------------------------------------------------------------------------------------------------------------------------------------------------------------------------------------------------------------------------------------------------------------------------------------------------------------------------------------------|
| 1  | SMS        | Farmer 2014                  | Quasi-experimental:<br>HxCtrl.         | HIV clinic attendees,<br>GBR. n=951(Int)<br>n=822(HxCtrl)                                                                    | HIV | SMS reminder 2 days<br>before appointment.                                                                           | ATT FU<br>appointment: LTFU<br>& cancellation rate.                                                                              | No difference in LTFU (25% vs.28%) or cancellation (62% vs.64%) / No impact.                                                                                                                                                                                                                                                                                                                                                                               |
| 2  |            |                              |                                        |                                                                                                                              |     |                                                                                                                      |                                                                                                                                  |                                                                                                                                                                                                                                                                                                                                                                                                                                                            |
| 3  | SMS        | Finocchario-<br>Kessler 2014 | Quasi-experimental:<br>HxCtrl.         | HIV+ mother-infant<br>pairs, KEN.<br>n=523(Int)<br>n=320(HxCtrl)                                                             | HIV | SMS notification of<br>available test results and<br>appointment reminder.                                           | ATT treatment:<br>Attendance rate.<br>TAT: Time from test<br>to diagnosis & test to<br>treat.<br>Feasibility: Retention<br>rate. | More infants initiated on ART (Urban: 11/11 vs. 1/7, p<0.001; Peri-urban: 14/14 vs. 9/14, p<0.05) / Effective.<br>Shorter median time to diagnosis (5 vs. 6.3W (urban) & 3.4 vs. 8.1W (peri-urban); both p<0.001). Shorter median time to treat (13 vs. 40 days (urban) & 1 vs. 36 days (peri-urban); p<0.001) / Effective.<br>Retention rate double at 9M post-natal (45.1% vs. 93% (urban) and 43.2% vs. 94.1% (peri-urban); p<0.001) / Highly feasible. |
| 4  |            |                              |                                        |                                                                                                                              |     |                                                                                                                      |                                                                                                                                  |                                                                                                                                                                                                                                                                                                                                                                                                                                                            |
| 5  |            |                              |                                        |                                                                                                                              |     |                                                                                                                      |                                                                                                                                  |                                                                                                                                                                                                                                                                                                                                                                                                                                                            |
| 6  |            |                              |                                        |                                                                                                                              |     |                                                                                                                      |                                                                                                                                  |                                                                                                                                                                                                                                                                                                                                                                                                                                                            |
| 7  |            |                              |                                        |                                                                                                                              |     |                                                                                                                      |                                                                                                                                  |                                                                                                                                                                                                                                                                                                                                                                                                                                                            |
| 8  |            |                              |                                        |                                                                                                                              |     |                                                                                                                      |                                                                                                                                  |                                                                                                                                                                                                                                                                                                                                                                                                                                                            |
| 9  |            |                              |                                        |                                                                                                                              |     |                                                                                                                      |                                                                                                                                  |                                                                                                                                                                                                                                                                                                                                                                                                                                                            |
| 10 | SMS        | Guy 2012                     | Quasi-experimental:<br>HxCtrl.         | STI clinic, AUS.<br>n=141(Int)<br>n=338(HxCtrl)                                                                              | CT  | SMS re-testing reminder<br>3M after initial infection.                                                               | ATT testing:<br>Attendance rate.                                                                                                 | Higher retesting rate (30% 1-4M post-infection vs. 21%; p=0.04); AOR=1.57(1.01-2.46) / Effective.                                                                                                                                                                                                                                                                                                                                                          |
| 11 |            |                              |                                        |                                                                                                                              |     |                                                                                                                      |                                                                                                                                  |                                                                                                                                                                                                                                                                                                                                                                                                                                                            |
| 12 |            |                              |                                        |                                                                                                                              |     |                                                                                                                      |                                                                                                                                  |                                                                                                                                                                                                                                                                                                                                                                                                                                                            |
| 13 | SMS        | Joseph Davey<br>2016         | RCT.                                   | HIV+ adults on ART,<br>MOZ<br>n=416 (Int)<br>n=414 (Ctrl)                                                                    | HIV | SMS reminders 2 and 7<br>days of appointment and<br>ART drug-pick up +<br>educational SMS every<br>2M.               | ATT treatment:<br>Attendance rate.                                                                                               | Nonsignificant difference in overall retention in care at 12 M (93.8% vs 91%, p=0.139) / No impact.                                                                                                                                                                                                                                                                                                                                                        |
| 14 |            |                              |                                        |                                                                                                                              |     |                                                                                                                      |                                                                                                                                  |                                                                                                                                                                                                                                                                                                                                                                                                                                                            |
| 15 |            |                              |                                        |                                                                                                                              |     |                                                                                                                      |                                                                                                                                  |                                                                                                                                                                                                                                                                                                                                                                                                                                                            |
| 16 |            |                              |                                        |                                                                                                                              |     |                                                                                                                      |                                                                                                                                  |                                                                                                                                                                                                                                                                                                                                                                                                                                                            |
| 17 |            |                              |                                        |                                                                                                                              |     |                                                                                                                      |                                                                                                                                  |                                                                                                                                                                                                                                                                                                                                                                                                                                                            |
| 18 | SMS        | Kapman 2016                  | Quasi-experimental:<br>HxCtrl.         | Heterosexual clinic<br>attendees dx & tx for<br>CT, 16-23 yrs, NLD<br>n=828 (Int)<br>n=1530 (Ctrl)                           | CT  | 2 SMS reminders at<br>5.5M & 6M after initial<br>dx with CT for retesting<br>appointment scheduling<br>& attendance. | ATT testing:<br>Attendance rate.                                                                                                 | Higher attendance rate between 5-8M after initial dx (30.6% vs. 9.2%).                                                                                                                                                                                                                                                                                                                                                                                     |
| 19 |            |                              |                                        |                                                                                                                              |     |                                                                                                                      |                                                                                                                                  |                                                                                                                                                                                                                                                                                                                                                                                                                                                            |
| 20 |            |                              |                                        |                                                                                                                              |     |                                                                                                                      |                                                                                                                                  |                                                                                                                                                                                                                                                                                                                                                                                                                                                            |
| 21 |            |                              |                                        |                                                                                                                              |     |                                                                                                                      |                                                                                                                                  |                                                                                                                                                                                                                                                                                                                                                                                                                                                            |
| 22 |            |                              |                                        |                                                                                                                              |     |                                                                                                                      |                                                                                                                                  |                                                                                                                                                                                                                                                                                                                                                                                                                                                            |
| 23 | SMS        | Kharbanda 2011               | Quasi-experimental:<br>Conc. + HxCtrl. | Parents of girls 9-20<br>yrs at clinics, USA.<br>n=124(Int)<br>n=308(Conc. Ctrl)<br>n=1080(HxCtrl)                           | HPV | Up to 3 weekly SMS<br>vaccination reminders.                                                                         | ATT vaccination:<br>Attendance rate.                                                                                             | More likely to get vaccine on time after controlling for insurance and site of care (AOR=1.83(1.23-2.71)) / Effective.                                                                                                                                                                                                                                                                                                                                     |
| 24 |            |                              |                                        |                                                                                                                              |     |                                                                                                                      |                                                                                                                                  |                                                                                                                                                                                                                                                                                                                                                                                                                                                            |
| 25 |            |                              |                                        |                                                                                                                              |     |                                                                                                                      |                                                                                                                                  |                                                                                                                                                                                                                                                                                                                                                                                                                                                            |
| 26 |            |                              |                                        |                                                                                                                              |     |                                                                                                                      |                                                                                                                                  |                                                                                                                                                                                                                                                                                                                                                                                                                                                            |
| 27 |            |                              |                                        |                                                                                                                              |     |                                                                                                                      |                                                                                                                                  |                                                                                                                                                                                                                                                                                                                                                                                                                                                            |
| 28 | SMS        | Kliner 2013                  | Quasi-experimental:<br>HxCtrl.         | HIV+ at hospital,<br>SWZ. n=162(Int)<br>n=297(HxCtrl)                                                                        | HIV | SMS reminders one day<br>before appointment.                                                                         | ATT FU<br>appointment:<br>Attendance rate.                                                                                       | No difference. SMS 83.3% vs. Ctrl 80.1%; p=0.401. AOR=1.13, p=0.662 / No impact.                                                                                                                                                                                                                                                                                                                                                                           |
| 29 |            |                              |                                        |                                                                                                                              |     |                                                                                                                      |                                                                                                                                  |                                                                                                                                                                                                                                                                                                                                                                                                                                                            |
| 30 |            |                              |                                        |                                                                                                                              |     |                                                                                                                      |                                                                                                                                  |                                                                                                                                                                                                                                                                                                                                                                                                                                                            |
| 31 | SMS        | Matheson 2014                | Quasi-experimental.                    | 11-22 yrs at clinic,<br>USA.<br>n=37(Int) n=232(Ctrl)                                                                        | HPV | SMS vaccination<br>reminders (3 SMS per<br>dose).                                                                    | ATT vaccination:<br>Attendance rate.                                                                                             | Higher attendance rate. HPV2 vaccine complete: 73% vs.34%, (p=0.000); on-time HPV2 38% vs. 25%, (p=0.035). HPV3 complete 16% vs.6%, (p=0.018); on-time HPV3 14% vs.3%, (p=0.007) / Effective.                                                                                                                                                                                                                                                              |
| 32 |            |                              |                                        |                                                                                                                              |     |                                                                                                                      |                                                                                                                                  |                                                                                                                                                                                                                                                                                                                                                                                                                                                            |
| 33 |            |                              |                                        |                                                                                                                              |     |                                                                                                                      |                                                                                                                                  |                                                                                                                                                                                                                                                                                                                                                                                                                                                            |
| 34 | SMS        | McIver 2016                  | Quasi-experimental:<br>HxCtrl.         | Clinic attendees<br>susceptible to HBV<br>(HIV+, bisexual,<br>CSW, IDUs,<br>Aboriginals), AUS<br>n=241 (Int)<br>n=463 (Ctrl) | HBV | SMS reminders 1 day<br>before appointment for<br>HBV vaccine doses 2&3<br>reattendance.                              | ATT vaccination:<br>Attendance rate.                                                                                             | Nonsignificant decrease in attendance rate within 12 M (54% vs 56% for 2 doses, p=0.65/ 24% vs 30% for 3 doses, p=0.07) / No impact<br>Nonsignificant difference in completion of 3 doses in 12M. aOR= 0.7 (0.48-1.01)/No impact.                                                                                                                                                                                                                          |
| 35 |            |                              |                                        |                                                                                                                              |     |                                                                                                                      |                                                                                                                                  |                                                                                                                                                                                                                                                                                                                                                                                                                                                            |
| 36 |            |                              |                                        |                                                                                                                              |     |                                                                                                                      |                                                                                                                                  |                                                                                                                                                                                                                                                                                                                                                                                                                                                            |
| 37 |            |                              |                                        |                                                                                                                              |     |                                                                                                                      |                                                                                                                                  |                                                                                                                                                                                                                                                                                                                                                                                                                                                            |
| 38 |            |                              |                                        |                                                                                                                              |     |                                                                                                                      |                                                                                                                                  |                                                                                                                                                                                                                                                                                                                                                                                                                                                            |
| 39 |            |                              |                                        |                                                                                                                              |     |                                                                                                                      |                                                                                                                                  |                                                                                                                                                                                                                                                                                                                                                                                                                                                            |
| 40 | SMS        | Njuguna 2016                 | RCT.                                   | Rural women, 18-24<br>yrs, KEN<br>n=300 (Int)<br>n=300 (Ctrl)                                                                | HIV | Weekly SMS on HIV<br>and reproductive health.                                                                        | ATT testing: Self-<br>report.                                                                                                    | Significant increase in reported testing at 6M (67% vs 51%, aHR=1.54(1.25-1.90) / Effective.                                                                                                                                                                                                                                                                                                                                                               |
| 41 |            |                              |                                        |                                                                                                                              |     |                                                                                                                      |                                                                                                                                  |                                                                                                                                                                                                                                                                                                                                                                                                                                                            |
| 42 |            |                              |                                        |                                                                                                                              |     |                                                                                                                      |                                                                                                                                  |                                                                                                                                                                                                                                                                                                                                                                                                                                                            |
| 43 |            |                              |                                        |                                                                                                                              |     |                                                                                                                      |                                                                                                                                  |                                                                                                                                                                                                                                                                                                                                                                                                                                                            |
| 44 | SMS vs. PC | Norton 2014                  | RCT                                    | HIV+, 17+ yrs, USA.<br>n=25(Int) n=27(Ctrl)                                                                                  | HIV | SMS appointment<br>reminder vs. message to<br>home phone                                                             | ATT FU<br>appointment:<br>Attendance rate.                                                                                       | No difference (72% vs. 81%, p=0.42) but patients already had high attendance rate / No impact.                                                                                                                                                                                                                                                                                                                                                             |
| 45 |            |                              |                                        |                                                                                                                              |     |                                                                                                                      |                                                                                                                                  |                                                                                                                                                                                                                                                                                                                                                                                                                                                            |
| 46 |            |                              |                                        |                                                                                                                              |     |                                                                                                                      |                                                                                                                                  |                                                                                                                                                                                                                                                                                                                                                                                                                                                            |

|    |          |                |                                        |                                                                                                                                                       |          |                                                                                  |                                                                                                             |                                                                                                                                                                                                                                                                                                                                                                                                                                                 |
|----|----------|----------------|----------------------------------------|-------------------------------------------------------------------------------------------------------------------------------------------------------|----------|----------------------------------------------------------------------------------|-------------------------------------------------------------------------------------------------------------|-------------------------------------------------------------------------------------------------------------------------------------------------------------------------------------------------------------------------------------------------------------------------------------------------------------------------------------------------------------------------------------------------------------------------------------------------|
| 1  | SMS      | Nyatsanza 2016 | Quasi-experimental:<br>HxCtrl.         | MSM & CSW at high-<br>risk of STI, GBR<br>n=266 (Int)<br>n=273 (Ctrl)                                                                                 | HIV/STI  | Personalised SMS<br>reminders for<br>reattendance.                               | ATT testing:<br>Attendance rate.                                                                            | Significantly higher reattendance rate at 6M (56% vs. 33%, p<0.001)/<br>Effective.                                                                                                                                                                                                                                                                                                                                                              |
| 2  |          |                |                                        |                                                                                                                                                       |          |                                                                                  |                                                                                                             |                                                                                                                                                                                                                                                                                                                                                                                                                                                 |
| 3  | SMS      | Odeny 2012     | RCT                                    | Males circumcised at<br>clinic 18+ yrs, KEN.<br>n=600(Int)<br>n=600(Ctrl)                                                                             | HIV      | Daily SMS for 1W.                                                                | ATT FU<br>appointment:<br>Attendance rate.<br>PB: Self-report.                                              | Improved attendance within 3 days of post-operative clinic appointment:<br>65.4% vs.59.7% (RR=1.09(1.00–1.20); p=0.04) / Effective.<br>Abstinence of sexual activity before FU: 28.3% vs. 25.2% (RR=1.13(0.91-<br>1.38), p=0.3) / No impact.                                                                                                                                                                                                    |
| 4  |          |                |                                        |                                                                                                                                                       |          |                                                                                  |                                                                                                             |                                                                                                                                                                                                                                                                                                                                                                                                                                                 |
| 5  |          |                |                                        |                                                                                                                                                       |          |                                                                                  |                                                                                                             |                                                                                                                                                                                                                                                                                                                                                                                                                                                 |
| 6  |          |                |                                        |                                                                                                                                                       |          |                                                                                  |                                                                                                             |                                                                                                                                                                                                                                                                                                                                                                                                                                                 |
| 7  |          |                |                                        |                                                                                                                                                       |          |                                                                                  |                                                                                                             |                                                                                                                                                                                                                                                                                                                                                                                                                                                 |
| 8  | SMS      | Rand 2015      | RCT                                    | 11-16 yrs at clinic,<br>USA. n=1893(Int)<br>n=1919(Ctrl)                                                                                              | HPV      | SMS appointment<br>reminders.                                                    | ATT vaccination:<br>Attendance rate.                                                                        | Higher HPV1 vaccination rate (16% vs. 13%; HR= 1.3(1.0-1.6); p=0.04) /<br>Effective.                                                                                                                                                                                                                                                                                                                                                            |
| 9  |          |                |                                        |                                                                                                                                                       |          |                                                                                  |                                                                                                             |                                                                                                                                                                                                                                                                                                                                                                                                                                                 |
| 10 |          |                |                                        |                                                                                                                                                       |          |                                                                                  |                                                                                                             |                                                                                                                                                                                                                                                                                                                                                                                                                                                 |
| 11 | SMS/PC   | Rand 2016      | RCT.                                   | Clinic attendees<br>Parents of youth 11-17<br>yrs who received 1st<br>HPV vaccine, USA.<br>n=191 (SMS)<br>n=200 (Ctrl);<br>n=178 (PC)<br>n=180 (Ctrl) | HPV      | SMS appointment<br>reminders to receive 3<br>doses of HPV vaccine<br>over 2 yrs. | ATT vaccination:<br>Attendance rate.<br>TAT: Time from<br>enroll to completion<br>of 3 vaccines.            | SMS: Significant difference in vaccination rates compared to control (49%<br>vs 30%, p=0.001)/ Effective.<br>PC: No difference in vaccination rates compared to control (48% vs 40%,<br>p=0.34)/ No impact.<br>SMS: Significant difference in time taken to complete 3 HPV doses (71 days<br>earlier than control, p<0.001)/ Effective.<br>PC: No difference in time taken to complete 3 HPV doses compared to<br>control ( p=0.08)/ No impact. |
| 12 |          |                |                                        |                                                                                                                                                       |          |                                                                                  |                                                                                                             |                                                                                                                                                                                                                                                                                                                                                                                                                                                 |
| 13 |          |                |                                        |                                                                                                                                                       |          |                                                                                  |                                                                                                             |                                                                                                                                                                                                                                                                                                                                                                                                                                                 |
| 14 |          |                |                                        |                                                                                                                                                       |          |                                                                                  |                                                                                                             |                                                                                                                                                                                                                                                                                                                                                                                                                                                 |
| 15 |          |                |                                        |                                                                                                                                                       |          |                                                                                  |                                                                                                             |                                                                                                                                                                                                                                                                                                                                                                                                                                                 |
| 16 |          |                |                                        |                                                                                                                                                       |          |                                                                                  |                                                                                                             |                                                                                                                                                                                                                                                                                                                                                                                                                                                 |
| 17 |          |                |                                        |                                                                                                                                                       |          |                                                                                  |                                                                                                             |                                                                                                                                                                                                                                                                                                                                                                                                                                                 |
| 18 |          |                |                                        |                                                                                                                                                       |          |                                                                                  |                                                                                                             |                                                                                                                                                                                                                                                                                                                                                                                                                                                 |
| 19 |          |                |                                        |                                                                                                                                                       |          |                                                                                  |                                                                                                             |                                                                                                                                                                                                                                                                                                                                                                                                                                                 |
| 20 | SMS + PC | Schwartz 2015  | Quasi-experimental:<br>HxCtrl.         | HIV+ pregnant<br>women on ART, ZAF.<br>n=50                                                                                                           | HIV      | SMS messages and PCs<br>from a case manager<br>(CM) through 6W<br>postpartum.    | ATT testing:<br>Attendance rate.<br>Acceptability: Self-<br>report.<br>Feasibility:<br>Completion rate.     | More infant testing (90.0% vs. 63.3% at 10W; p<0.01) / Effective.<br>Helpful to have CM support during pregnancy and postpartum (98%) /<br>Highly acceptable.<br>96% completed postpartum questionnaire / Highly feasible.                                                                                                                                                                                                                      |
| 21 |          |                |                                        |                                                                                                                                                       |          |                                                                                  |                                                                                                             |                                                                                                                                                                                                                                                                                                                                                                                                                                                 |
| 22 |          |                |                                        |                                                                                                                                                       |          |                                                                                  |                                                                                                             |                                                                                                                                                                                                                                                                                                                                                                                                                                                 |
| 23 |          |                |                                        |                                                                                                                                                       |          |                                                                                  |                                                                                                             |                                                                                                                                                                                                                                                                                                                                                                                                                                                 |
| 24 |          |                |                                        |                                                                                                                                                       |          |                                                                                  |                                                                                                             |                                                                                                                                                                                                                                                                                                                                                                                                                                                 |
| 25 |          |                |                                        |                                                                                                                                                       |          |                                                                                  |                                                                                                             |                                                                                                                                                                                                                                                                                                                                                                                                                                                 |
| 26 | SMS + PC | Segaren 2012   | UnCtrlled trial.                       | Mothers of HIV+<br>infants, HTI. n=108                                                                                                                | HIV      | Cell phones + regular PC<br>for monitoring of mother<br>& child.                 | ATT treatment:<br>Attendance rate.<br>Acceptability: Self-<br>report.                                       | All 76 w/ active phones were adherent to treatment (attended 6/6 monthly<br>hospital appointments).<br>70% phones active after Int.; good for med reminders (63%) / Moderately<br>acceptable.                                                                                                                                                                                                                                                   |
| 27 |          |                |                                        |                                                                                                                                                       |          |                                                                                  |                                                                                                             |                                                                                                                                                                                                                                                                                                                                                                                                                                                 |
| 28 |          |                |                                        |                                                                                                                                                       |          |                                                                                  |                                                                                                             |                                                                                                                                                                                                                                                                                                                                                                                                                                                 |
| 29 |          |                |                                        |                                                                                                                                                       |          |                                                                                  |                                                                                                             |                                                                                                                                                                                                                                                                                                                                                                                                                                                 |
| 30 | SMS + PC | Smillie 2014   | UnCtrlled trial.                       | HIV+ in clinic 14+<br>yrs, CAN. n=20                                                                                                                  | HIV      | Weekly PC or SMS for<br>6M.                                                      | ATT FU<br>appointment: Self-<br>report.<br>Acceptability: Self-<br>report.<br>Feasibility: Self-<br>report. | 65% said SMS had no effect on attendance.<br>Beneficial for appointment scheduling (80%) & reminder (75%). All would<br>recommend to a friend / Highly acceptable.<br>75% had no difficulty in receiving and responding to SMS / Highly feasible.                                                                                                                                                                                               |
| 31 |          |                |                                        |                                                                                                                                                       |          |                                                                                  |                                                                                                             |                                                                                                                                                                                                                                                                                                                                                                                                                                                 |
| 32 |          |                |                                        |                                                                                                                                                       |          |                                                                                  |                                                                                                             |                                                                                                                                                                                                                                                                                                                                                                                                                                                 |
| 33 |          |                |                                        |                                                                                                                                                       |          |                                                                                  |                                                                                                             |                                                                                                                                                                                                                                                                                                                                                                                                                                                 |
| 34 |          |                |                                        |                                                                                                                                                       |          |                                                                                  |                                                                                                             |                                                                                                                                                                                                                                                                                                                                                                                                                                                 |
| 35 |          |                |                                        |                                                                                                                                                       |          |                                                                                  |                                                                                                             |                                                                                                                                                                                                                                                                                                                                                                                                                                                 |
| 36 |          |                |                                        |                                                                                                                                                       |          |                                                                                  |                                                                                                             |                                                                                                                                                                                                                                                                                                                                                                                                                                                 |
| 37 | SMS      | Tolly 2012     | RCT                                    | Randomly sampled<br>adults (existing<br>database), ZAF.<br>n=438(in each of 4<br>Int.)<br>n=801(Ctrl)                                                 | HIV      | 3 or 10 motivational or<br>informational SMS.                                    | ATT testing: Self-<br>report.<br>Feasibility: Self-<br>report.                                              | Improved attendance in group receiving 10 motivational SMS at 3W: (69%<br>vs. 57%; OR=1.7(1.10–2.390), p=0.0036) / Effective.<br>SMS motivated HIV counseling and testing uptake in 89% / Highly feasible.                                                                                                                                                                                                                                      |
| 38 |          |                |                                        |                                                                                                                                                       |          |                                                                                  |                                                                                                             |                                                                                                                                                                                                                                                                                                                                                                                                                                                 |
| 39 |          |                |                                        |                                                                                                                                                       |          |                                                                                  |                                                                                                             |                                                                                                                                                                                                                                                                                                                                                                                                                                                 |
| 40 |          |                |                                        |                                                                                                                                                       |          |                                                                                  |                                                                                                             |                                                                                                                                                                                                                                                                                                                                                                                                                                                 |
| 41 |          |                |                                        |                                                                                                                                                       |          |                                                                                  |                                                                                                             |                                                                                                                                                                                                                                                                                                                                                                                                                                                 |
| 42 |          |                |                                        |                                                                                                                                                       |          |                                                                                  |                                                                                                             |                                                                                                                                                                                                                                                                                                                                                                                                                                                 |
| 43 | SMS      | Vilella 2004   | Quasi-experimental:<br>Conc. + HxCtrl. | 18+ yrs at travel clinic,<br>ESP. n=738(Int)<br>n=1610(Conc. Ctrl)<br>n=2247(HxCtrl)                                                                  | HAV/ HBV | SMS reminders for<br>vaccination<br>appointments.                                | ATT vaccination:<br>Attendance rate.                                                                        | Improved adherence for 3rd HepA+B dose. (47.1% vs. 26.9%,<br>RR=1.75(1.41–2.17) in Conc. Ctrl and 23.6%(20.1–27.4), RR=2.00(1.63–<br>2.45) in HxCtrl) / Effective.                                                                                                                                                                                                                                                                              |
| 44 |          |                |                                        |                                                                                                                                                       |          |                                                                                  |                                                                                                             |                                                                                                                                                                                                                                                                                                                                                                                                                                                 |
| 45 |          |                |                                        |                                                                                                                                                       |          |                                                                                  |                                                                                                             |                                                                                                                                                                                                                                                                                                                                                                                                                                                 |
| 46 |          |                |                                        |                                                                                                                                                       |          |                                                                                  |                                                                                                             |                                                                                                                                                                                                                                                                                                                                                                                                                                                 |

|    |                      |                     |                                  |                                                           |     |                                                                        |                                          |                                                                                                                                                                                                                   |
|----|----------------------|---------------------|----------------------------------|-----------------------------------------------------------|-----|------------------------------------------------------------------------|------------------------------------------|-------------------------------------------------------------------------------------------------------------------------------------------------------------------------------------------------------------------|
| 1  | SMS                  | Ammassari 2010      | UnCtrlled trial.                 | HIV+, ITA. n=71                                           | HIV | SMS reminders.                                                         | ART in NAPs: Self-report.                | Increased adherence over 9M. (93.2% vs.79.6%, p=0.003) / Effective.                                                                                                                                               |
| 2  |                      |                     |                                  |                                                           |     |                                                                        |                                          |                                                                                                                                                                                                                   |
| 3  | SMS                  | Ammassari 2011      | UnCtrlled trial.                 | HIV+, 18+ yrs, ITA. n=145                                 | HIV | SMS reminders.                                                         | ART in NAPs: Self-report.                | Increased adherence at 9M (94.9% vs.78.8%, p<0.001) / Effective.                                                                                                                                                  |
| 4  |                      |                     |                                  |                                                           |     |                                                                        |                                          |                                                                                                                                                                                                                   |
| 5  |                      |                     |                                  |                                                           |     |                                                                        | ART in NAPs: VL.                         | More w/ undetectable VL at 9M (76.2% vs. 42.3%, p<0.001) / Effective.                                                                                                                                             |
| 6  |                      |                     |                                  |                                                           |     |                                                                        | Acceptability: Self-report.              | >90% reporting SMS helpful / Highly acceptable.                                                                                                                                                                   |
| 7  |                      |                     |                                  |                                                           |     |                                                                        |                                          |                                                                                                                                                                                                                   |
| 8  | PC + cash incentives | Belzer 2014         | RCT                              | HIV+ 12-29 yrs, USA. n=19(Int) n=18(Ctrl)                 | HIV | Daily PC reminders and referrals if necessary+ free phone & plan.      | ART in NAPs: Self-report.                | Increased adherence for 1M & 3 M (OR=3.09(1.20-7.98); OR=2.85(1.02-7.97)) / Effective.                                                                                                                            |
| 9  |                      |                     |                                  |                                                           |     |                                                                        | ART in NAPs: VL.                         | Lower VL at wk 24 and 48 (2.82 vs. 4.52, p=0.002; 3.23 vs. 4.23, p=0.043) / Effective.                                                                                                                            |
| 10 |                      |                     |                                  |                                                           |     |                                                                        |                                          |                                                                                                                                                                                                                   |
| 11 |                      |                     |                                  |                                                           |     |                                                                        |                                          |                                                                                                                                                                                                                   |
| 12 |                      |                     |                                  |                                                           |     |                                                                        |                                          |                                                                                                                                                                                                                   |
| 13 | SMS                  | Cantudo-Cuenca 2016 | Retrospective quasi-exprimental. | HIV + on ART, ESP n=120 (Int&Ctrl)                        | HIV | SMS on ART adherence.                                                  | ART in PVLA: Pharmacy refills.           | Statistically sign relationship bt no SMS and ART adherence(OR= 0.35 (0.14-0.8), p=0.025) [multivariate analysis]/ Effective.                                                                                     |
| 14 |                      |                     |                                  |                                                           |     |                                                                        |                                          |                                                                                                                                                                                                                   |
| 15 |                      |                     |                                  |                                                           |     |                                                                        |                                          |                                                                                                                                                                                                                   |
| 16 | SMS                  | da Costa 2012       | RCT                              | HIV+ women, BRA. n=8(Int) n=13(Ctrl)                      | HIV | Daily SMS reminders.                                                   | ART in APs: Pill count.                  | Increased adherence over 4M (50% vs. 38.5%; p=0.604) / No impact.                                                                                                                                                 |
| 17 |                      |                     |                                  |                                                           |     |                                                                        | ART in APs: MEM.                         | Increased adherence over 4M (75% vs. 46%; p=0.195) / No impact.                                                                                                                                                   |
| 18 |                      |                     |                                  |                                                           |     |                                                                        | ART in APs: Self-report.                 | Increased adherence (100% vs. 84.6% in Ctrl; p=0.244) / No impact.                                                                                                                                                |
| 19 |                      |                     |                                  |                                                           |     |                                                                        | Acceptability: Self-report.              | 82% believed SMS were helpful, 77% wanted to keep receiving SMS / Highly acceptable.                                                                                                                              |
| 20 |                      |                     |                                  |                                                           |     |                                                                        |                                          |                                                                                                                                                                                                                   |
| 21 |                      |                     |                                  |                                                           |     |                                                                        |                                          |                                                                                                                                                                                                                   |
| 22 |                      |                     |                                  |                                                           |     |                                                                        |                                          |                                                                                                                                                                                                                   |
| 23 |                      |                     |                                  |                                                           |     |                                                                        |                                          |                                                                                                                                                                                                                   |
| 24 | SMS                  | Downshen 2011       | UnCtrlled trial.                 | HIV+ 14-29 yrs, AUS. n=25                                 | HIV | Daily SMS ART reminder + FU SMS 1hr later.                             | ART in NAPs: Self-report.                | Increased adherence (Baseline Mean=74.7; 12W Mean=93.3; 24WMean=93.1; p<0.001) / Effective.                                                                                                                       |
| 25 |                      |                     |                                  |                                                           |     |                                                                        | ART in NAPs: VL + CD4 count.             | Insignificant change in CD4 cell count & VL (mean VL= 2750, CD4= 502 to VL= 29, CD4= 545 at 24W, p=0.12) / No impact.                                                                                             |
| 26 |                      |                     |                                  |                                                           |     |                                                                        | Acceptability: Self-report.              | 81% want SMS after study end. Helped decrease missed doses in 95% / Highly acceptable.                                                                                                                            |
| 27 |                      |                     |                                  |                                                           |     |                                                                        |                                          |                                                                                                                                                                                                                   |
| 28 |                      |                     |                                  |                                                           |     |                                                                        |                                          |                                                                                                                                                                                                                   |
| 29 |                      |                     |                                  |                                                           |     |                                                                        |                                          |                                                                                                                                                                                                                   |
| 30 | SMS                  | Downshen 2011       | UnCtrlled trial.                 | HIV+ 14-29 yrs, AUS. n=25                                 | HIV | Daily SMS ART reminder + FU SMS 1hr later.                             | ART in NAPs: Self-report.                | Decreased adherence (58.3% for 0-12W vs. 55.2% for 13-24W, p=0.53) / No impact.                                                                                                                                   |
| 31 |                      |                     |                                  |                                                           |     |                                                                        | Feasibility: Completion & response rate. | 84% completed all study visits. 61.4% response rate / Highly feasible.                                                                                                                                            |
| 32 |                      |                     |                                  |                                                           |     |                                                                        |                                          |                                                                                                                                                                                                                   |
| 33 |                      |                     |                                  |                                                           |     |                                                                        |                                          |                                                                                                                                                                                                                   |
| 34 |                      |                     |                                  |                                                           |     |                                                                        |                                          |                                                                                                                                                                                                                   |
| 35 |                      |                     |                                  |                                                           |     |                                                                        |                                          |                                                                                                                                                                                                                   |
| 36 | SMS + cash incentive | Garofalo 2016       | RCT                              | 16-29yrs, HIV+ on ART for ≥1M , USA. n=51(Int) n=54(Ctrl) | HIV | Daily personalised SMS over 6M to remind participants take medications | ART in NAPs: Self-report.                | Significant difference in adherence compared to control at 3M OR=2.57 (1.01-6.54). Not significant at 6M OR=1.68 (0.69-4.09). Significant difference from baseline to 6M OR=2.12 (95% CI 1.01-4.45). / Effective. |
| 37 |                      |                     |                                  |                                                           |     |                                                                        | ART in NAPs: VL.                         | No difference in log viral load or viral suppression compared to control at 3 and 6M / No impact.                                                                                                                 |
| 38 |                      |                     |                                  |                                                           |     |                                                                        | Acceptability: Self-report.              | 100% would recommend intervention to those in need, 81 % wanted to continue getting the text messages after conclusion of the study, 95 % satisfied with the intervention overall / Highly acceptable             |
| 39 |                      |                     |                                  |                                                           |     |                                                                        | Feasibility: Response rate.              | 58% average response rate to SMS / Moderately feasible.                                                                                                                                                           |
| 40 |                      |                     |                                  |                                                           |     |                                                                        |                                          |                                                                                                                                                                                                                   |
| 41 |                      |                     |                                  |                                                           |     |                                                                        |                                          |                                                                                                                                                                                                                   |
| 42 |                      |                     |                                  |                                                           |     |                                                                        |                                          |                                                                                                                                                                                                                   |
| 43 |                      |                     |                                  |                                                           |     |                                                                        |                                          |                                                                                                                                                                                                                   |
| 44 |                      |                     |                                  |                                                           |     |                                                                        |                                          |                                                                                                                                                                                                                   |
| 45 |                      |                     |                                  |                                                           |     |                                                                        |                                          |                                                                                                                                                                                                                   |
| 46 |                      |                     |                                  |                                                           |     |                                                                        |                                          |                                                                                                                                                                                                                   |

|    |                                   |                |      |                                                                                        |     |                                                                                                                                                                              |                                                              |                                                                                                                                                                                                                                                                                           |                                                                                                                                                     |                                                             |                                                              |
|----|-----------------------------------|----------------|------|----------------------------------------------------------------------------------------|-----|------------------------------------------------------------------------------------------------------------------------------------------------------------------------------|--------------------------------------------------------------|-------------------------------------------------------------------------------------------------------------------------------------------------------------------------------------------------------------------------------------------------------------------------------------------|-----------------------------------------------------------------------------------------------------------------------------------------------------|-------------------------------------------------------------|--------------------------------------------------------------|
| 1  | <b>SMS +PC</b>                    | Haberer 2016   | RCT  | ≥18yrs, HIV+ on ART, UGA.<br>n=21(Scheduled SMS)<br>n=20 (Triggered SMS)<br>n=21(Ctrl) | HIV | Scheduled SMS: 1M daily SMS, 2M weekly SMS, 6M SMS sent to patient and support if needed. Triggered SMS; SMS sent to patient and support if no signal received from monitor. | ART: MEM                                                     | Significant difference in scheduled SMS intervention compared to control (11.1% increase in adherence, 48-h and more than 96-h lapses were less frequent (IRR=0.6, p value=0.02 and IRR 0.3, P<0.001, respectively).<br>Similar adherence in triggered SMS vs control group. / Effective. |                                                                                                                                                     |                                                             |                                                              |
| 2  |                                   |                |      |                                                                                        |     |                                                                                                                                                                              | ART: VL                                                      |                                                                                                                                                                                                                                                                                           | No significant differences in HIV RNA suppression among study arms (p value = 0.14). 47/62 participants virally suppressed at 3 and 9M / No impact. |                                                             |                                                              |
| 3  |                                   |                |      |                                                                                        |     |                                                                                                                                                                              |                                                              |                                                                                                                                                                                                                                                                                           |                                                                                                                                                     |                                                             |                                                              |
| 4  |                                   |                |      |                                                                                        |     |                                                                                                                                                                              |                                                              |                                                                                                                                                                                                                                                                                           |                                                                                                                                                     |                                                             |                                                              |
| 5  |                                   |                |      |                                                                                        |     |                                                                                                                                                                              |                                                              |                                                                                                                                                                                                                                                                                           |                                                                                                                                                     |                                                             |                                                              |
| 6  |                                   |                |      |                                                                                        |     |                                                                                                                                                                              |                                                              |                                                                                                                                                                                                                                                                                           |                                                                                                                                                     |                                                             |                                                              |
| 7  | <b>SMS</b>                        | Hardy 2011     | RCT  | HIV+ 18+ yrs, USA.<br>n=12(SMS)<br>n=14(Beeper)                                        | HIV | SMS vs. beeper reminders.                                                                                                                                                    | ART in APs: Composite score (MEM+ pill count + self-report). | Higher adherence at 6W. (MD=27.1(7.6-46.6), p=0.009) / Effective.                                                                                                                                                                                                                         |                                                                                                                                                     |                                                             |                                                              |
| 8  |                                   |                |      |                                                                                        |     |                                                                                                                                                                              | ART in APs: MEM.                                             |                                                                                                                                                                                                                                                                                           | Increased adherence. (MD=33.4(14.1-52.6), p = 0.002) / Effective.                                                                                   |                                                             |                                                              |
| 9  |                                   |                |      |                                                                                        |     |                                                                                                                                                                              | ART in APs: Pill count.                                      |                                                                                                                                                                                                                                                                                           |                                                                                                                                                     | No difference. (MD=13.7(-6.7-34.1), p = 0.153) / No impact. |                                                              |
| 10 |                                   |                |      |                                                                                        |     |                                                                                                                                                                              | ART in APs: Self-report.                                     |                                                                                                                                                                                                                                                                                           |                                                                                                                                                     |                                                             | No difference. (MD=20.2 (-1.8-42.1), p = 0.069) / No impact. |
| 11 |                                   |                |      |                                                                                        |     |                                                                                                                                                                              |                                                              |                                                                                                                                                                                                                                                                                           |                                                                                                                                                     |                                                             |                                                              |
| 12 |                                   |                |      |                                                                                        |     |                                                                                                                                                                              |                                                              |                                                                                                                                                                                                                                                                                           |                                                                                                                                                     |                                                             |                                                              |
| 13 |                                   |                |      |                                                                                        |     |                                                                                                                                                                              |                                                              |                                                                                                                                                                                                                                                                                           |                                                                                                                                                     |                                                             |                                                              |
| 14 |                                   |                |      |                                                                                        |     |                                                                                                                                                                              |                                                              |                                                                                                                                                                                                                                                                                           |                                                                                                                                                     |                                                             |                                                              |
| 15 |                                   |                |      |                                                                                        |     |                                                                                                                                                                              |                                                              |                                                                                                                                                                                                                                                                                           |                                                                                                                                                     |                                                             |                                                              |
| 16 | <b>SMS</b>                        | Jeffries 2016  | RCT  | 15-24yrs, HIV+, USA.<br>n=91(Int) n=45(Ctrl)                                           | HIV | UCARE4LIFE daily mobile text messaging intervention over 3M to improve HIV care among youth                                                                                  | ART: VL                                                      | Significant difference in ART adherence in intervention vs control among non-adherent/new to ART at baseline (6M p=0.03). / Effective.<br>No sig difference in those on ART at baseline (6M p=0.119) /No impact.                                                                          |                                                                                                                                                     |                                                             |                                                              |
| 17 |                                   |                |      |                                                                                        |     |                                                                                                                                                                              | Acceptability: Self-report.                                  |                                                                                                                                                                                                                                                                                           | Mean score = 8.44 (SD=2.45) on 10 point Likert Scale for appointment reminder SMS./ Highly acceptable                                               |                                                             |                                                              |
| 18 |                                   |                |      |                                                                                        |     |                                                                                                                                                                              |                                                              |                                                                                                                                                                                                                                                                                           |                                                                                                                                                     |                                                             |                                                              |
| 19 |                                   |                |      |                                                                                        |     |                                                                                                                                                                              |                                                              |                                                                                                                                                                                                                                                                                           |                                                                                                                                                     |                                                             |                                                              |
| 20 |                                   |                |      |                                                                                        |     |                                                                                                                                                                              |                                                              |                                                                                                                                                                                                                                                                                           |                                                                                                                                                     |                                                             |                                                              |
| 21 | <b>PC</b>                         | Kalichman 2011 | RCT  | HIV+ 18+ yrs, USA.<br>n=21(Int) n=19(Ctrl)                                             | HIV | PC counselling.                                                                                                                                                              | ART in NAPs: Pill count.                                     | No difference at 4M (F(1,36)=3.32, p<0.07) / No impact.                                                                                                                                                                                                                                   |                                                                                                                                                     |                                                             |                                                              |
| 22 |                                   |                |      |                                                                                        |     |                                                                                                                                                                              | Feasibility: Completion rate.                                |                                                                                                                                                                                                                                                                                           | 99% completion rate / Highly feasible.                                                                                                              |                                                             |                                                              |
| 23 |                                   |                |      |                                                                                        |     |                                                                                                                                                                              |                                                              |                                                                                                                                                                                                                                                                                           |                                                                                                                                                     |                                                             |                                                              |
| 24 |                                   |                |      |                                                                                        |     |                                                                                                                                                                              |                                                              |                                                                                                                                                                                                                                                                                           |                                                                                                                                                     |                                                             |                                                              |
| 25 | <b>SMS</b>                        | Kassaye 2016   | RCT. | HIV+ pregnant women, KEN<br>n=280 (Int)<br>n=270 (Ctrl)                                | HIV | 3 to 6 weekly SMS (ART reminders, motivational, PMTCT, child health & nutrition).                                                                                            | ART in TNPs: Self-report.                                    | Nonsignificant difference in adherence to ART at 34-36W gestation between the 2 groups (97.3% vs 99.6%, aRR= 1.25 (0.43-3.60)/No impact.<br>Nonsignificant difference in adherence to ART at delivery between the 2 groups (94.7% vs 100%, aRR=1.01 (0.88-1.16))./ No impact.             |                                                                                                                                                     |                                                             |                                                              |
| 26 |                                   |                |      |                                                                                        |     |                                                                                                                                                                              |                                                              |                                                                                                                                                                                                                                                                                           |                                                                                                                                                     |                                                             |                                                              |
| 27 |                                   |                |      |                                                                                        |     |                                                                                                                                                                              |                                                              |                                                                                                                                                                                                                                                                                           |                                                                                                                                                     |                                                             |                                                              |
| 28 | <b>PC</b>                         | Kebaya 2014    | RCT  | HIV+ mothers in PMTCT, KEN.<br>n=75(Int) n=75(Ctrl)                                    | HIV | Bi-weekly PC.                                                                                                                                                                | ART in TNPs: Self-report.                                    | Increased adherence (90.7% vs. 72%, p=0.005) / Effective.                                                                                                                                                                                                                                 |                                                                                                                                                     |                                                             |                                                              |
| 29 |                                   |                |      |                                                                                        |     |                                                                                                                                                                              | Feasibility: Retention rate.                                 |                                                                                                                                                                                                                                                                                           | More likely to remain in treatment at 10W (69.3% vs 37.3%, p<0.001) / Moderately feasible.                                                          |                                                             |                                                              |
| 30 |                                   |                |      |                                                                                        |     |                                                                                                                                                                              |                                                              |                                                                                                                                                                                                                                                                                           |                                                                                                                                                     |                                                             |                                                              |
| 31 |                                   |                |      |                                                                                        |     |                                                                                                                                                                              |                                                              |                                                                                                                                                                                                                                                                                           |                                                                                                                                                     |                                                             |                                                              |
| 32 | <b>SMS</b>                        | Lester 2010    | RCT  | HIV+ 18+ yrs, KEN.<br>n=273(Int)<br>n=265(Ctrl)                                        | HIV | Weekly SMS.                                                                                                                                                                  | ART in TNPs: Self-report.                                    | Improved adherence at 6M and 12M: RR=0.81(0.69-0.94) p=0.006 / Effective.<br>Lower virological failure (RR=0.84(0.71-0.99) p=0.04) and improved viral suppression (OR=0.71(0.5-1.01) p=0.058) / Effective.                                                                                |                                                                                                                                                     |                                                             |                                                              |
| 33 |                                   |                |      |                                                                                        |     |                                                                                                                                                                              | ART in TNPs: VL.                                             |                                                                                                                                                                                                                                                                                           |                                                                                                                                                     |                                                             |                                                              |
| 34 |                                   |                |      |                                                                                        |     |                                                                                                                                                                              |                                                              |                                                                                                                                                                                                                                                                                           |                                                                                                                                                     |                                                             |                                                              |
| 35 | <b>SMS + PC + cash incentives</b> | Maduka 2013    | RCT  | HIV+ at hospital 20+ yrs, NGA. n=52(Int)<br>n=52(Ctrl)                                 | HIV | 2 monthly counselling PCs + 2 weekly SMS+ cash incentives                                                                                                                    | ART in NAPs: Self-report.                                    | Increased adherence (76.9% vs. 55.8%, X2=5.211,p=0.022; RR=0.725(0.55-0.96)) / Effective.<br>Improved CD4+ count (193-->575 cells/mL vs. 131-->361.5 cells/mL; p=0.007) / Effective.                                                                                                      |                                                                                                                                                     |                                                             |                                                              |
| 36 |                                   |                |      |                                                                                        |     |                                                                                                                                                                              | ART in NAPs: CD4 count.                                      |                                                                                                                                                                                                                                                                                           |                                                                                                                                                     |                                                             |                                                              |
| 37 |                                   |                |      |                                                                                        |     |                                                                                                                                                                              |                                                              |                                                                                                                                                                                                                                                                                           |                                                                                                                                                     |                                                             |                                                              |
| 38 | <b>SMS + PC</b>                   | Mbuagbaw 2012  | RCT  | HIV+ 21+ yrs, CMR.<br>n=101(Int) n=99(Ctrl)                                            | HIV | Weekly motivational SMS. Phone number to call for support.                                                                                                                   | ART in PVLA: Self-report.                                    | No difference. (RR=1.06(0.89-1.29); p=0.542) / No impact.<br>No difference at 6 months (MD=0.1(-0.23-0.43); p=0.617) / No impact.<br>91.1% believed SMS reminders helped; 65% were satisfied; 81.2% would recommend to a friend / Highly acceptable.                                      |                                                                                                                                                     |                                                             |                                                              |
| 39 |                                   |                |      |                                                                                        |     |                                                                                                                                                                              | ART in PVLA: Pharmacy Refills.                               |                                                                                                                                                                                                                                                                                           |                                                                                                                                                     |                                                             |                                                              |
| 40 |                                   |                |      |                                                                                        |     |                                                                                                                                                                              | Acceptability: Self-report.                                  |                                                                                                                                                                                                                                                                                           |                                                                                                                                                     |                                                             |                                                              |
| 41 |                                   |                |      |                                                                                        |     |                                                                                                                                                                              |                                                              |                                                                                                                                                                                                                                                                                           |                                                                                                                                                     |                                                             |                                                              |
| 42 |                                   |                |      |                                                                                        |     |                                                                                                                                                                              |                                                              |                                                                                                                                                                                                                                                                                           |                                                                                                                                                     |                                                             |                                                              |
| 43 |                                   |                |      |                                                                                        |     |                                                                                                                                                                              |                                                              |                                                                                                                                                                                                                                                                                           |                                                                                                                                                     |                                                             |                                                              |
| 44 |                                   |                |      |                                                                                        |     |                                                                                                                                                                              |                                                              |                                                                                                                                                                                                                                                                                           |                                                                                                                                                     |                                                             |                                                              |
| 45 |                                   |                |      |                                                                                        |     |                                                                                                                                                                              |                                                              |                                                                                                                                                                                                                                                                                           |                                                                                                                                                     |                                                             |                                                              |
| 46 |                                   |                |      |                                                                                        |     |                                                                                                                                                                              |                                                              |                                                                                                                                                                                                                                                                                           |                                                                                                                                                     |                                                             |                                                              |

|    |                      |                      |                             |                                                                                  |     |                                                                                                                       |                                                                           |                                                                                                                                                                                                                                                                                |
|----|----------------------|----------------------|-----------------------------|----------------------------------------------------------------------------------|-----|-----------------------------------------------------------------------------------------------------------------------|---------------------------------------------------------------------------|--------------------------------------------------------------------------------------------------------------------------------------------------------------------------------------------------------------------------------------------------------------------------------|
| 1  | SMS                  | Moore 2015           | RCT                         | HIV+ bipolar 18+ yrs, USA.<br>n=25(Int) n=25(Ctrl)                               | HIV | SMS reminders.                                                                                                        | ART in PVLA: MEM.                                                         | No difference. (86.2% (SD= 12.7) vs. 84.8% (SD= 18.1); p=0.95; d=0.01) / No impact.                                                                                                                                                                                            |
| 2  |                      |                      |                             |                                                                                  |     |                                                                                                                       |                                                                           |                                                                                                                                                                                                                                                                                |
| 3  | SMS                  | Nsagha 2016          | RCT.                        | HIV+ on ART, 18+yrs, CMR<br>n=45 (Int)<br>n=45 (Ctrl)                            | HIV | 4 weekly educative SMS over 1M.                                                                                       | ART in PVLA: Self-report.<br>Acceptability: Self-report.                  | Nonsignificant difference in adherence to ART at 1M between the 2 groups (64.4% vs 44.2%, p=0.056)/ No impact.<br>57.8% wished the SMS to continue/ Moderately acceptable                                                                                                      |
| 4  |                      |                      |                             |                                                                                  |     |                                                                                                                       |                                                                           |                                                                                                                                                                                                                                                                                |
| 5  |                      |                      |                             |                                                                                  |     |                                                                                                                       |                                                                           |                                                                                                                                                                                                                                                                                |
| 6  |                      |                      |                             |                                                                                  |     |                                                                                                                       |                                                                           |                                                                                                                                                                                                                                                                                |
| 7  | SMS                  | Pop-Eleches 2010     | RCT                         | HIV+ 18+ yrs, rural KEN.<br>n=142(Daily SMS)<br>n=147(Weekly SMS)<br>n=139(Ctrl) | HIV | Daily or weekly SMS.                                                                                                  | ART in PVLA: MEM.<br>ART in PVLA: MEM.                                    | Increased adherence in weekly SMS group over 48W (53% vs. 40% p=0.03) / Effective.<br>No difference between daily SMS group and Ctrl (41% vs. 40% p=0.92) / No impact.                                                                                                         |
| 8  |                      |                      |                             |                                                                                  |     |                                                                                                                       |                                                                           |                                                                                                                                                                                                                                                                                |
| 9  |                      |                      |                             |                                                                                  |     |                                                                                                                       |                                                                           |                                                                                                                                                                                                                                                                                |
| 10 |                      |                      |                             |                                                                                  |     |                                                                                                                       |                                                                           |                                                                                                                                                                                                                                                                                |
| 11 |                      |                      |                             |                                                                                  |     |                                                                                                                       |                                                                           |                                                                                                                                                                                                                                                                                |
| 12 | SMS + cash incentive | Rana 2016            | UnCtrlled trial.            | HIV+, 18+yrs, USA.<br>n=32                                                       | HIV | Bi-directional weekly SMS appointment reminders, daily ART reminder & supportive messages.                            | ART in PVLA: Undetectable VL<br>ATT treatment: Attendance rate.           | Significant increase in the number of participants with undetectable VL at 6M (25 vs. 18, p=0.002)/ Effective.<br>20/32 completed all visits within 6M study period.                                                                                                           |
| 13 |                      |                      |                             |                                                                                  |     |                                                                                                                       |                                                                           |                                                                                                                                                                                                                                                                                |
| 14 |                      |                      |                             |                                                                                  |     |                                                                                                                       |                                                                           |                                                                                                                                                                                                                                                                                |
| 15 |                      |                      |                             |                                                                                  |     |                                                                                                                       |                                                                           |                                                                                                                                                                                                                                                                                |
| 16 |                      |                      |                             |                                                                                  |     |                                                                                                                       |                                                                           |                                                                                                                                                                                                                                                                                |
| 17 | SMS                  | Sabin 2015           | RCT                         | HIV+ 18+ yrs, in CHN. n=63(Int)<br>n=56(Ctrl)                                    | HIV | SMS reminders via MEM + adherence counselling.                                                                        | ART in PVLA: MEM.<br>ART in PVLA: VL.                                     | Increased adherence over 6M (82% vs. 51.8%; RR=1.59(1.21- 2.10), p<0.001) / Effective.<br>No difference in undetectable VL (93.6% vs. 98.2%, p=0.218) / No impact.                                                                                                             |
| 18 |                      |                      |                             |                                                                                  |     |                                                                                                                       |                                                                           |                                                                                                                                                                                                                                                                                |
| 19 |                      |                      |                             |                                                                                  |     |                                                                                                                       |                                                                           |                                                                                                                                                                                                                                                                                |
| 20 |                      |                      |                             |                                                                                  |     |                                                                                                                       |                                                                           |                                                                                                                                                                                                                                                                                |
| 21 |                      |                      |                             |                                                                                  |     |                                                                                                                       |                                                                           |                                                                                                                                                                                                                                                                                |
| 22 |                      |                      |                             |                                                                                  |     |                                                                                                                       |                                                                           |                                                                                                                                                                                                                                                                                |
| 23 | BC + MMS.            | Shet 2014            | RCT                         | HIV+ 18-60 yrs, IND. n=315(Int)<br>n=316(Ctrl)                                   | HIV | Weekly automated motivational voice call, followed by weekly MMS.                                                     | ART in TNPs: VL.<br>ART in TNPs: Pill count.<br>Feasibility: PC received. | No difference. (Number of virological failures: 15.6% vs. 15.5%. Time to virological failure: aHR= 0.96(0.65-1.43), p= 0.85) / No impact.<br>No difference. (27% vs. 21.7%; aIRR=1.24(0.94-1.63), p=0.13) / No impact.<br>86% of calls received by patients / Highly feasible. |
| 24 |                      |                      |                             |                                                                                  |     |                                                                                                                       |                                                                           |                                                                                                                                                                                                                                                                                |
| 25 |                      |                      |                             |                                                                                  |     |                                                                                                                       |                                                                           |                                                                                                                                                                                                                                                                                |
| 26 |                      |                      |                             |                                                                                  |     |                                                                                                                       |                                                                           |                                                                                                                                                                                                                                                                                |
| 27 |                      |                      |                             |                                                                                  |     |                                                                                                                       |                                                                           |                                                                                                                                                                                                                                                                                |
| 28 |                      |                      |                             |                                                                                  |     |                                                                                                                       |                                                                           |                                                                                                                                                                                                                                                                                |
| 29 | SMS                  | Walsh 2012           | UnCtrlled trial.            | HIV+ Adults on ART, GBR. n=14                                                    | HIV | Pill-box w/ MEM + weekly SMS wrt med taking + up to 3 late dose SMS reminders.                                        | ART in APs: Self-report + MEM.<br>Acceptability: Self-report.             | 99.5% baseline adherence, 98% at 24W. No difference in missed doses (4.8% in 0-12W; 6.3% in 13-24W)<br>64% satisfied, 50% found SMS & system useful. 55% found reminders irritating / Moderately acceptable.                                                                   |
| 30 |                      |                      |                             |                                                                                  |     |                                                                                                                       |                                                                           |                                                                                                                                                                                                                                                                                |
| 31 |                      |                      |                             |                                                                                  |     |                                                                                                                       |                                                                           |                                                                                                                                                                                                                                                                                |
| 32 |                      |                      |                             |                                                                                  |     |                                                                                                                       |                                                                           |                                                                                                                                                                                                                                                                                |
| 33 | SMS                  | Lim 2008             | Quasi-experimental: HxCtrl. | STI clinic, NZL. n=293(Int)<br>n=303(HxCtrl)                                     | CT  | SMS to contact clinic for CT test result.                                                                             | TAT: Time from test to treat.                                             | No change in median time to treat (3 days vs. 4 days, t = - 1.3, p<0.1) / No impact.                                                                                                                                                                                           |
| 34 |                      |                      |                             |                                                                                  |     |                                                                                                                       |                                                                           |                                                                                                                                                                                                                                                                                |
| 35 |                      |                      |                             |                                                                                  |     |                                                                                                                       |                                                                           |                                                                                                                                                                                                                                                                                |
| 36 | SMS                  | Menon-Johansson 2006 | Quasi-experimental.         | At clinic w/untreated CT, GBR. n=28(Int)<br>n=21(Ctrl)                           | CT  | SMS to contact clinic for CT test result.                                                                             | TAT: Time from test to diagnosis & test to treat.                         | Shorter mean time to diagnosis. (7.9 days vs. 12.5; p<0.001)<br>Shorter median time to treat. (8.5 days vs. 15; p=0.005) / Effective.                                                                                                                                          |
| 37 |                      |                      |                             |                                                                                  |     |                                                                                                                       |                                                                           |                                                                                                                                                                                                                                                                                |
| 38 |                      |                      |                             |                                                                                  |     |                                                                                                                       |                                                                           |                                                                                                                                                                                                                                                                                |
| 39 | SMS+PC               | Barnabas 2016        | RCT                         | 16-49 yrs., ZAF & UGA. n=284(Int)<br>n=224(Ctrl)                                 | HIV | SMS promoting male circumcision 3W, 6-7W after tested negative. Follow-up phone call 1M & 2M following SMS reminders. | PB: Self-report.                                                          | Significant difference in reaching outcome at 3M (Intervention vs clinic referral); 48% (RR=1.72 95% CI 1.36-2.17, p values < 0.0001) in SMS reminder group and 47% (RR=1.67, 95%CI 1.29-2.14, p value = 0.0001) in lay counsellor follow-up achieved MC at 3M / Effective     |
| 40 |                      |                      |                             |                                                                                  |     |                                                                                                                       |                                                                           |                                                                                                                                                                                                                                                                                |
| 41 |                      |                      |                             |                                                                                  |     |                                                                                                                       |                                                                           |                                                                                                                                                                                                                                                                                |
| 42 |                      |                      |                             |                                                                                  |     |                                                                                                                       |                                                                           |                                                                                                                                                                                                                                                                                |
| 43 |                      |                      |                             |                                                                                  |     |                                                                                                                       |                                                                           |                                                                                                                                                                                                                                                                                |
| 44 |                      |                      |                             |                                                                                  |     |                                                                                                                       |                                                                           |                                                                                                                                                                                                                                                                                |
| 45 | SMS + MMS.           | Cornelius 2013       | UnCtrlled trial.            | African-Americans age 13-18, USA. n=40                                           | HIV | HIV-prevention SMS + knowledge question for                                                                           | PB: Self-report.                                                          | Improved condom attitudes & HIV knowledge (83% vs.78% correct answers) / No impact.                                                                                                                                                                                            |
| 46 |                      |                      |                             |                                                                                  |     |                                                                                                                       |                                                                           |                                                                                                                                                                                                                                                                                |
| 47 |                      |                      |                             |                                                                                  |     |                                                                                                                       |                                                                           |                                                                                                                                                                                                                                                                                |
| 48 |                      |                      |                             |                                                                                  |     |                                                                                                                       |                                                                           |                                                                                                                                                                                                                                                                                |
| 49 |                      |                      |                             |                                                                                  |     |                                                                                                                       |                                                                           |                                                                                                                                                                                                                                                                                |



|    |                      |                   |                               |                                                                         |     |                                                                               |                                                                                                                                                                                                                                                                                                                        |
|----|----------------------|-------------------|-------------------------------|-------------------------------------------------------------------------|-----|-------------------------------------------------------------------------------|------------------------------------------------------------------------------------------------------------------------------------------------------------------------------------------------------------------------------------------------------------------------------------------------------------------------|
| 1  |                      |                   |                               |                                                                         | 3W. | Acceptability: Self-report.                                                   | 97% satisfied w/ number of SMS. 86% reported SMS not interfering w/ daily activities/ Highly acceptable.                                                                                                                                                                                                               |
| 2  |                      |                   |                               |                                                                         |     | Feasibility: Completion rate.                                                 | 100% at pretest; 90% at 3M FU/ Highly feasible.                                                                                                                                                                                                                                                                        |
| 3  |                      |                   |                               |                                                                         |     |                                                                               |                                                                                                                                                                                                                                                                                                                        |
| 4  | PC                   | DiClemente 2014   | RCT                           | High-risk African-American women 14-20 yrs, USA. n=342(Int) n=359(Ctrl) | CT  | PC w/ prevention messages every 8W.                                           | PB: % diagnosed w/ CT or GC. PB: Self-report. Higher condom use (MD=0.08(0.06 to 0.10) p=0.04) / Effective.                                                                                                                                                                                                            |
| 5  |                      |                   |                               |                                                                         |     |                                                                               | Fewer participants diagnosed w/ CT & GC (90 vs. 104; RR = 0.5 (0.28-0.88), p=0.02. 48 vs. 54; RR = 0.4 (0.15-1.02), p=0.06) / Effective.                                                                                                                                                                               |
| 6  |                      |                   |                               |                                                                         |     |                                                                               |                                                                                                                                                                                                                                                                                                                        |
| 7  |                      |                   |                               |                                                                         |     |                                                                               |                                                                                                                                                                                                                                                                                                                        |
| 8  | SMS + cash incentive | Juzang 2011       | Non-randomized Ctrlled trial. | African-American men 16-20 yrs, USA. n=30/group                         | HIV | 3 weekly SMS HIV prevention messages + \$40 for completion.                   | PB: Self-report. No statistical difference in % of protected sex. Higher awareness of sexual health / No impact.                                                                                                                                                                                                       |
| 9  |                      |                   |                               |                                                                         |     |                                                                               |                                                                                                                                                                                                                                                                                                                        |
| 10 |                      |                   |                               |                                                                         |     | Feasibility: Retention rate.                                                  | 20 (67%) retained in Ctrl & 19 (63%) in SMS group after 2nd FU / Moderately feasible.                                                                                                                                                                                                                                  |
| 11 |                      |                   |                               |                                                                         |     |                                                                               |                                                                                                                                                                                                                                                                                                                        |
| 12 | SMS                  | Odeny 2014        | RCT                           | Circumcised male at clinic, 18+ yrs, KE. n=600(Int) n=600(Ctrl)         | HIV | Daily SMS for 1wk + SMS on days 8, 14, 21, 28, 35, 41, and 42 post-procedure. | PB: Self-report. Abstinence of sexual activity before 42-day follow up: 139/491(28.3%) vs. 124/493(25.2%) in control group (RR=1.13(0.91-1.38), p=0.3)/ No impact.                                                                                                                                                     |
| 13 |                      |                   |                               |                                                                         |     |                                                                               |                                                                                                                                                                                                                                                                                                                        |
| 14 |                      |                   |                               |                                                                         |     |                                                                               |                                                                                                                                                                                                                                                                                                                        |
| 15 |                      |                   |                               |                                                                         |     |                                                                               |                                                                                                                                                                                                                                                                                                                        |
| 16 | SMS                  | Reback 2015       | UnCtrlled trial.              | MSM drug users 18-65 yrs, USA. n=52                                     | HIV | Daily SMS for 2W to reduce risky sexual behaviours.                           | PB: Self-report. Reduction in anal sex (6.9 vs. 2.6, t97=2.82, p<0.05) and unprotected anal sex (1.8 vs. 0.5, t97=2.19, p<0.05) in past 2M/ Effective.                                                                                                                                                                 |
| 17 |                      |                   |                               |                                                                         |     |                                                                               |                                                                                                                                                                                                                                                                                                                        |
| 18 |                      |                   |                               |                                                                         |     |                                                                               |                                                                                                                                                                                                                                                                                                                        |
| 19 | PC                   | Belzer 2015       | RCT                           | HIV+ 12-29 yrs, USA. n=19(Int) n=18(Ctrl)                               | HIV | PC 1hr from time to take medication.                                          | Acceptability: Self-report. 94% satisfied w/ call length and 81% would continue receiving calls / Highly acceptable.                                                                                                                                                                                                   |
| 20 |                      |                   |                               |                                                                         |     |                                                                               |                                                                                                                                                                                                                                                                                                                        |
| 21 |                      |                   |                               |                                                                         |     | Feasibility: Retention rate.                                                  | 63% retention rate / Moderately feasible.                                                                                                                                                                                                                                                                              |
| 22 |                      |                   |                               |                                                                         |     |                                                                               |                                                                                                                                                                                                                                                                                                                        |
| 23 | SMS                  | Dean 2012         | Feasibility study.            | HIV+ at antenatal clinics, ZAF. n=7                                     | HIV | SMS support group+ inquiries answered by physicians.                          | Acceptability: Self-report. Overall satisfaction.                                                                                                                                                                                                                                                                      |
| 24 |                      |                   |                               |                                                                         |     |                                                                               |                                                                                                                                                                                                                                                                                                                        |
| 25 |                      |                   |                               |                                                                         |     | Feasibility: Self-report.                                                     | SMS easily kept confidential.                                                                                                                                                                                                                                                                                          |
| 26 |                      |                   |                               |                                                                         |     |                                                                               |                                                                                                                                                                                                                                                                                                                        |
| 27 | SMS                  | Roth 2014         | Feasibility study.            | Sex workers 18+ yrs, USA. n=26                                          | HIV | Cell phone diaries to collect info about sexual events.                       | Acceptability: Self-report. Cell-phone electronic dairies to collect sensitive information acceptable (84.6%)/ Highly acceptable.                                                                                                                                                                                      |
| 28 |                      |                   |                               |                                                                         |     |                                                                               |                                                                                                                                                                                                                                                                                                                        |
| 29 |                      |                   |                               |                                                                         |     | Feasibility: Completion rate.                                                 | 90.3% surveys completed / Highly feasible.                                                                                                                                                                                                                                                                             |
| 30 |                      |                   |                               |                                                                         |     |                                                                               |                                                                                                                                                                                                                                                                                                                        |
| 31 | SMS                  | Georgette 2016    | Feasibility study.            | ≥18yrs, HIV+, ZAF. n=88                                                 | HIV | Weekly SMS reminders to increase ART adherence and appointment reminders      | Acceptability: Self-report. 92% would recommend SMS program to a friend, 90.9% said frequency of SMS was just right, 2/88 felt the SMS program slightly violated their privacy. 97.7% reported it helped them remember to take medication. 77.3% agreed that it helped them remember appointments. / Highly acceptable |
| 32 |                      |                   |                               |                                                                         |     |                                                                               |                                                                                                                                                                                                                                                                                                                        |
| 33 |                      |                   |                               |                                                                         |     |                                                                               |                                                                                                                                                                                                                                                                                                                        |
| 34 |                      |                   |                               |                                                                         |     |                                                                               |                                                                                                                                                                                                                                                                                                                        |
| 35 | SMS                  | Reid 2014         | Cross-sectional study.        | HIV+, BWA. n=42(Int) n=41(Ctrl)                                         | HIV | SMS ARV pick-up reminder.                                                     | Acceptability: Self-report. SMS helpful 93% (Int) vs. 58% (Ctrl) (p<0.001). SMS may lead to serostatus disclosure 10% vs. 56% (p<0.001). 95% satisfied w/ appointment scheduling. 90% would continue receiving SMS / Highly acceptable.                                                                                |
| 36 |                      |                   |                               |                                                                         |     |                                                                               |                                                                                                                                                                                                                                                                                                                        |
| 37 |                      |                   |                               |                                                                         |     |                                                                               |                                                                                                                                                                                                                                                                                                                        |
| 38 | PC                   | Bauermeister 2014 | Feasibility study.            | MSM 18-30, USA. n=124                                                   | HIV | IVRS: microbicide use.                                                        | Feasibility: Self-report. 75.5% reported no problems using IVRS / Highly feasible.                                                                                                                                                                                                                                     |
| 39 |                      |                   |                               |                                                                         |     |                                                                               |                                                                                                                                                                                                                                                                                                                        |
| 40 | SMS + MMS.           | Cornelius 2011    | Feasibility study.            | African-Americans age 13-18, USA. n=12                                  | HIV | HIV-prevention SMS+knowledge question for 3W.                                 | Feasibility: Response rate. 80% response rate/ Highly feasible.                                                                                                                                                                                                                                                        |
| 41 |                      |                   |                               |                                                                         |     |                                                                               |                                                                                                                                                                                                                                                                                                                        |
| 42 |                      |                   |                               |                                                                         |     |                                                                               |                                                                                                                                                                                                                                                                                                                        |

Note: Int= intervention; Ctrl= control; HxCtrl= historical control; PB= preventative behaviors (i.e. risk reduction); PN= partner notification; TAT= turnaround time; ATT= attendance rate; ART= ART adherence; NAPs= non-adherent patients; AP= adherent patients; PVLA= Patients with various levels of adherence; TNPs= Treatment naive patients; VL= viral load; CD4= CD4 cell count; PC= phone call; FB= Facebook.

1  
2  
3  
4  
5  
6  
7  
8  
9  
10  
11  
12  
13  
14  
15  
16  
17  
18  
19  
20  
21  
22  
23  
24  
25  
26  
27  
28  
29  
30  
31  
32  
33  
34  
35  
36  
37  
38  
39  
40  
41  
42  
43  
44  
45  
46  
47  
48  
49

**Appendix 3. Table of studies by innovation (in rows) and by outcomes (in columns)**

|                                                        | <i>Outcome</i>                                   | <i>Attendance rate</i> | <i>ART adherence</i> | <i>Risk reduction</i> | <i>Partner notification</i> | <i>Turnaround time</i> | <i>Self-care</i> | <i>Feasibility<sup>†</sup></i> | <i>Acceptability<sup>†</sup></i> |
|--------------------------------------------------------|--------------------------------------------------|------------------------|----------------------|-----------------------|-----------------------------|------------------------|------------------|--------------------------------|----------------------------------|
|                                                        | <i>Digital Innovation</i>                        |                        |                      |                       |                             |                        |                  |                                |                                  |
| <i>Number of Studies by Type of Digital Innovation</i> | <i>mHealth Innovations (SMS/phone call only)</i> | 30*                    | 24                   | 6                     | 0                           | 2*                     | 0                | 5                              | 2                                |
|                                                        | <i>Internet-based m/eHealth Innovations</i>      | 6                      | 4                    | 5                     | 0                           | 0                      | 1                | 4                              | 1                                |
|                                                        | <i>Combined innovations</i>                      | 1                      | 1                    | 0                     | 2                           | 0                      | 1                | 3                              | 1                                |

*Note: \*1 study evaluated both attendance rate and turnaround time and was counted as part of the 30 studies on attendance rate. † studies reporting feasibility and acceptability as secondary outcomes are counted elsewhere in the table depending on primary outcome.*

1  
2  
3  
4  
5  
6  
7  
8  
9  
10  
11  
12  
13  
14  
15  
16  
17  
18  
19  
20  
21  
22  
23  
24  
25  
26  
27  
28  
29  
30  
31  
32  
33  
34  
35  
36  
37  
38  
39  
40  
41  
42  
43  
44  
45  
46  
47  
48  
49  
50  
51  
52  
53  
54  
55  
56  
57  
58  
59  
60



317x171mm (300 x 300 DPI)

review only

1  
2  
3  
4  
5  
6  
7  
8  
9  
10  
11  
12  
13  
14  
15  
16  
17  
18  
19  
20  
21  
22  
23  
24  
25  
26  
27  
28  
29  
30  
31  
32  
33  
34  
35  
36  
37  
38  
39  
40  
41  
42  
43  
44  
45  
46  
47  
48  
49  
50  
51  
52  
53  
54  
55  
56  
57  
58  
59  
60

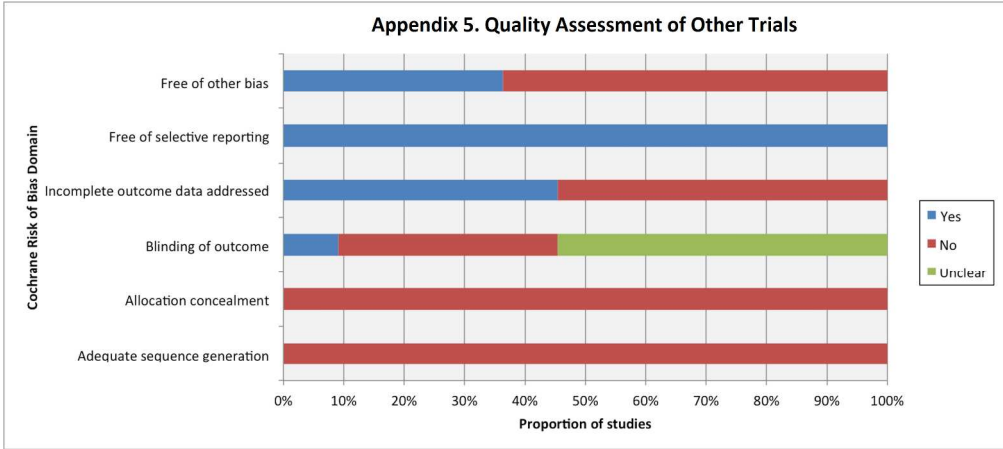

281x126mm (300 x 300 DPI)

er review only

1  
2  
3  
4  
5  
6  
7  
8  
9  
10  
11  
12  
13  
14  
15  
16  
17  
18  
19  
20  
21  
22  
23  
24  
25  
26  
27  
28  
29  
30  
31  
32  
33  
34  
35  
36  
37  
38  
39  
40  
41  
42  
43  
44  
45  
46  
47  
48  
49  
50  
51  
52  
53  
54  
55  
56  
57  
58  
59  
60



260x145mm (300 x 300 DPI)

review only



# PRISMA 2009 Checklist

1  
2  
3  
4  
5  
6  
7  
8  
9  
10  
11  
12  
13  
14  
15  
16  
17  
18  
19  
20  
21  
22  
23  
24  
25  
26  
27  
28  
29  
30  
31  
32  
33  
34  
35  
36  
37  
38  
39  
40  
41  
42  
43  
44  
45  
46  
47  
48  
49

| Section/topic                      | #  | Checklist item                                                                                                                                                                                                                                                                                              | Reported on page # |
|------------------------------------|----|-------------------------------------------------------------------------------------------------------------------------------------------------------------------------------------------------------------------------------------------------------------------------------------------------------------|--------------------|
| <b>TITLE</b>                       |    |                                                                                                                                                                                                                                                                                                             |                    |
| Title                              | 1  | Identify the report as a systematic review, meta-analysis, or both.                                                                                                                                                                                                                                         | 1                  |
| <b>ABSTRACT</b>                    |    |                                                                                                                                                                                                                                                                                                             |                    |
| Structured summary                 | 2  | Provide a structured summary including, as applicable: background; objectives; data sources; study eligibility criteria, participants, and interventions; study appraisal and synthesis methods; results; limitations; conclusions and implications of key findings; systematic review registration number. | 2                  |
| <b>INTRODUCTION</b>                |    |                                                                                                                                                                                                                                                                                                             |                    |
| Rationale                          | 3  | Describe the rationale for the review in the context of what is already known.                                                                                                                                                                                                                              | 3                  |
| Objectives                         | 4  | Provide an explicit statement of questions being addressed with reference to participants, interventions, comparisons, outcomes, and study design (PICOS).                                                                                                                                                  | 3                  |
| <b>METHODS</b>                     |    |                                                                                                                                                                                                                                                                                                             |                    |
| Protocol and registration          | 5  | Indicate if a review protocol exists, if and where it can be accessed (e.g., Web address), and, if available, provide registration information including registration number.                                                                                                                               | N/A                |
| Eligibility criteria               | 6  | Specify study characteristics (e.g., PICOS, length of follow-up) and report characteristics (e.g., years considered, language, publication status) used as criteria for eligibility, giving rationale.                                                                                                      | 4                  |
| Information sources                | 7  | Describe all information sources (e.g., databases with dates of coverage, contact with study authors to identify additional studies) in the search and date last searched.                                                                                                                                  | 4                  |
| Search                             | 8  | Present full electronic search strategy for at least one database, including any limits used, such that it could be repeated.                                                                                                                                                                               | 4                  |
| Study selection                    | 9  | State the process for selecting studies (i.e., screening, eligibility, included in systematic review, and, if applicable, included in the meta-analysis).                                                                                                                                                   | 4                  |
| Data collection process            | 10 | Describe method of data extraction from reports (e.g., piloted forms, independently, in duplicate) and any processes for obtaining and confirming data from investigators.                                                                                                                                  | 4                  |
| Data items                         | 11 | List and define all variables for which data were sought (e.g., PICOS, funding sources) and any assumptions and simplifications made.                                                                                                                                                                       | 4                  |
| Risk of bias in individual studies | 12 | Describe methods used for assessing risk of bias of individual studies (including specification of whether this was done at the study or outcome level), and how this information is to be used in any data synthesis.                                                                                      | 5                  |
| Summary measures                   | 13 | State the principal summary measures (e.g., risk ratio, difference in means).                                                                                                                                                                                                                               | 5                  |
| Synthesis of results               | 14 | Describe the methods of handling data and combining results of studies, if done, including measures of consistency (e.g., $I^2$ for each meta-analysis).                                                                                                                                                    | 4                  |





# PRISMA 2009 Checklist

Page 1 of 2

| Section/topic                 | #  | Checklist item                                                                                                                                                                                           | Reported on page # |
|-------------------------------|----|----------------------------------------------------------------------------------------------------------------------------------------------------------------------------------------------------------|--------------------|
| Risk of bias across studies   | 15 | Specify any assessment of risk of bias that may affect the cumulative evidence (e.g., publication bias, selective reporting within studies).                                                             | 5                  |
| Additional analyses           | 16 | Describe methods of additional analyses (e.g., sensitivity or subgroup analyses, meta-regression), if done, indicating which were pre-specified.                                                         | 4                  |
| <b>RESULTS</b>                |    |                                                                                                                                                                                                          |                    |
| Study selection               | 17 | Give numbers of studies screened, assessed for eligibility, and included in the review, with reasons for exclusions at each stage, ideally with a flow diagram.                                          | 5                  |
| Study characteristics         | 18 | For each study, present characteristics for which data were extracted (e.g., study size, PICOS, follow-up period) and provide the citations.                                                             | Abstraction Table  |
| Risk of bias within studies   | 19 | Present data on risk of bias of each study and, if available, any outcome level assessment (see item 12).                                                                                                | 8                  |
| Results of individual studies | 20 | For all outcomes considered (benefits or harms), present, for each study: (a) simple summary data for each intervention group (b) effect estimates and confidence intervals, ideally with a forest plot. | 6                  |
| Synthesis of results          | 21 | Present results of each meta-analysis done, including confidence intervals and measures of consistency.                                                                                                  | 6                  |
| Risk of bias across studies   | 22 | Present results of any assessment of risk of bias across studies (see Item 15).                                                                                                                          | 8, Supplementary   |
| Additional analysis           | 23 | Give results of additional analyses, if done (e.g., sensitivity or subgroup analyses, meta-regression [see Item 16]).                                                                                    | 6                  |
| <b>DISCUSSION</b>             |    |                                                                                                                                                                                                          |                    |
| Summary of evidence           | 24 | Summarize the main findings including the strength of evidence for each main outcome; consider their relevance to key groups (e.g., healthcare providers, users, and policy makers).                     | 8                  |
| Limitations                   | 25 | Discuss limitations at study and outcome level (e.g., risk of bias), and at review-level (e.g., incomplete retrieval of identified research, reporting bias).                                            | 10                 |
| Conclusions                   | 26 | Provide a general interpretation of the results in the context of other evidence, and implications for future research.                                                                                  | 10                 |
| <b>FUNDING</b>                |    |                                                                                                                                                                                                          |                    |
| Funding                       | 27 | Describe sources of funding for the systematic review and other support (e.g., supply of data); role of funders for the systematic review.                                                               | 13                 |

From: Moher D, Liberati A, Tetzlaff J, Altman DG, The PRISMA Group (2009). Preferred Reporting Items for Systematic Reviews and Meta-Analyses: The PRISMA Statement. PLoS Med 6(7): e1000097. doi:10.1371/journal.pmed1000097

For peer review only - <http://bmjopen.bmj.com/site/about/guidelines.xhtml>

For more information, visit: [www.prisma-statement.org](http://www.prisma-statement.org).



# PRISMA 2009 Checklist

- 1
- 2
- 3
- 4
- 5
- 6
- 7
- 8
- 9
- 10
- 11
- 12
- 13
- 14
- 15
- 16
- 17
- 18
- 19
- 20
- 21
- 22
- 23
- 24
- 25
- 26
- 27
- 28
- 29
- 30
- 31
- 32
- 33
- 34
- 35
- 36
- 37
- 38
- 39
- 40
- 41
- 42
- 43
- 44
- 45
- 46
- 47
- 48
- 49

For peer review only
