# Supplementary material for: Do digital innovations for HIV and sexually transmitted infections work? Results from a systematic review (1996-2017)
Source: PubMed Central journal article supplement (PMC5695353; doi:10.1136/bmjopen-2017-017604), 2017-11-03
Supplement: bmjopen-2017-017604supp002.pdf [file bmjopen-2017-017604supp002.pdf]

**Appendix 2: Abstraction table.**

| Combined Innovations                                | Author               | Study Design                                   | Participants/<br>Country                                  | STBBI             | Intervention                                                                                          | Measure/Metric                                                     | Results (MD=Mean difference, RR=risk ratio, IRR=incidence rate ratio, HR=hazard ratio, SD= standard deviation, 95% CI when presented. M=months, W=weeks) |
|-----------------------------------------------------|----------------------|------------------------------------------------|-----------------------------------------------------------|-------------------|-------------------------------------------------------------------------------------------------------|--------------------------------------------------------------------|----------------------------------------------------------------------------------------------------------------------------------------------------------|
| <b>Online campaign + SMS + TV.</b>                  | Friedman 2014        | Quasi-experimental: HxCtrl w/ population data. | ≤25 yrs, USA. n=N/A                                       | HIV, CT, GC       | GetYourselfTested: TV campaign w/ website & SMS service for STI info & clinic locator.                | ATT testing: Attendance rate.                                      | 41.2% more CT tests in 2010 vs. 2008, 90.5% more GC tests, and 190.3% more HIV tests.                                                                    |
|                                                     |                      |                                                |                                                           |                   |                                                                                                       | Acceptability: Number of followers.                                | 4477 FB followers and 1994 Twitter followers at yr 2.                                                                                                    |
|                                                     |                      |                                                |                                                           |                   |                                                                                                       | Feasibility: Referral rate.                                        | 83,404 referrals using clinic locator in yr1. 61,119 in yr2.                                                                                             |
| <b>Interactive website + SMS + cash incentives.</b> | Horvath 2013         | RCT                                            | HIV+ Gay/Bi-sexual men 18+ yrs, USA. n=67(Int) n=57(Ctrl) | HIV               | Online self-monitoring system w/ interactive interface + optional SMS reminders +\$25 gift card draw. | ART in PVLA: Self-report.<br>[Difference scores: DS = FU-baseline] | No difference. (DS=0.54, SD=25.2 vs. DS=-3.2, SD=24.5; t(107)=1.79, p=0.43) / No impact.                                                                 |
|                                                     |                      |                                                |                                                           |                   |                                                                                                       | ART in PVLA: Self-report.                                          | Increased adherence in drug users (DS= 7.1, SD= 22.1 vs. DS= -24, SD= 30.5; t(17)=2.52, p=0.02) / Effective.                                             |
|                                                     |                      |                                                |                                                           |                   |                                                                                                       | ART in PVLA: Self-report.                                          | Trend to taking meds within 2hrs of scheduled dose. DS=6.6, SD=29.3 vs. DS=-3, SD=29.6; t(105)=1.68, p=0.1 / No impact.                                  |
|                                                     |                      |                                                |                                                           |                   |                                                                                                       | Acceptability: Self-report.                                        | Mean score = 5.7 on 7-point Likert Scale for satisfaction / Highly acceptable.                                                                           |
|                                                     |                      |                                                |                                                           |                   |                                                                                                       | Feasibility: Completion rate.                                      | Completion rate 88% vs. 93% in Ctrl / Highly feasible.                                                                                                   |
| <b>Website + SMS</b>                                | Gotz 2014            | Cross-sectional study.                         | STI index patients at clinic, NLD. n=988                  | HIV, CT, GC, syph | Suggestatest.nl: online partner notification via SMS/email.                                           | PN: % partners notified.                                           | 14% notifications via SAT. 505 notifications sent (84% by SMS, 15% by email). 56% read notification. 20% visited one of 2 STI clinics.                   |
| <b>Social media + SMS.</b>                          | Hightow-Weidman 2014 | Quasi-experimental: HxCtrl.                    | HIV+ or syphilis+ patients, USA. n=362(Int) n=133(HxCtrl) | HIV, syphilis     | Notification on social networking sites + SMS                                                         | PN: % partners notified.                                           | 63.5% of contacts notified via internet in 2011 vs. 26% in 2010.                                                                                         |
| <b>PC/SMS/MMS + WhatsApp messages</b>               | John 2016            | UnCtrlled trial.                               | HIV+ non-disclosed, 15-29 yrs, NGA. n=19                  | HIV               | Weekly counselling, educational & motivational calls, SMS/MMS and WhatsApp messages over 3M.          | Self-care: Self-report.                                            | Significant increase in self-care performance at 6MI (p=0.002)/ Effective.                                                                               |
| <b>Interactive website + SMS</b>                    | Hightow-Weidman 2015 | Feasibility study.                             | Black MSM & transwomen 18-30 yrs, USA. n=15               | HIV               | HealthMpowerment.org: online community networking Int to reduce STI risk + health promotion messages. | Acceptability: Self-report.                                        | 86.7%-100% strongly agreed w/ acceptability questions / Highly acceptable.                                                                               |
|                                                     |                      |                                                |                                                           |                   |                                                                                                       | Feasibility: Retention rate.                                       | 100% retention rate. 7/15 participants used the site 1W after study ended / Highly feasible.                                                             |
| <b>Mobile app + SMS</b>                             | Hirsch-Moverman 2017 | Feasibility study.                             | ≥18yrs, HIV+/TB, LSO. n=171                               | HIV/TB            | CommCare application used to automatically send SMS medication reminders over 29M                     | Acceptability: Self-report.                                        | 41.9% think SMS facilitated adherence to TB /ART medication / Less acceptable.                                                                           |

|                         |              |                   |                                                   |     |                                                                              |                               |                                                                                                                                                                          |
|-------------------------|--------------|-------------------|---------------------------------------------------|-----|------------------------------------------------------------------------------|-------------------------------|--------------------------------------------------------------------------------------------------------------------------------------------------------------------------|
| <b>Mobile app + SMS</b> | Aronson 2016 | Feasibility study | 18-24 yrs, USA.<br>n=100                          | HIV | App assessing risk and sending SMS to encourage re-testing of HIV negatives. | Feasibility: Completion rate  | 98/100 completed the app process/ Highly feasible<br>30/100 accepted to receive HIV test<br>21/30 accepted to receive SMS<br>1/21 re-tested after 90 days window period. |
| <b>Website + SMS</b>    | Dokkum 2012  | UnCtrlled trial.  | 16-29 yrs, NLD.<br>n=52600(Rd 1)<br>n=41700(Rd 2) | CT  | At-home CT test + SMS/email to return test for analysis.                     | Feasibility: Completion rate. | Higher retesting rates (From 10% w/o reminders to 14% in round 1; from 7% to 10% in round 2) / Less feasible.                                                            |

**Note:** Int= intervention; Ctrl= control; HxCtrl= historical control; PB= preventative behaviors (i.e. risk reduction); PN= partner notification; TAT= turnaround time; ATT= attendance rate; ART= ART adherence; NAPs= non-adherent patients; AP= adherent patients; PVLA= Patients with various levels of adherence; TNPs= Treatment naive patients; VL= viral load; CD4= CD4 cell count; PC= phone call; FB= Facebook.

| Internet-based eHealth Innovation      | Author         | Study Design                                   | Participants/ Country                                                 | STBBI                 | Intervention                                                                                                                                    | Measure/Metric                                                                                           | Results (MD=Mean difference, RR=risk ratio, IRR=incidence rate ratio, HR=hazard ratio, SD= standard deviation, 95% CI when presented. M=months, W=weeks)                                                                                                                                                                                                                                                                         |
|----------------------------------------|----------------|------------------------------------------------|-----------------------------------------------------------------------|-----------------------|-------------------------------------------------------------------------------------------------------------------------------------------------|----------------------------------------------------------------------------------------------------------|----------------------------------------------------------------------------------------------------------------------------------------------------------------------------------------------------------------------------------------------------------------------------------------------------------------------------------------------------------------------------------------------------------------------------------|
| <b>Online campaign</b>                 | Downshen 2015  | Quasi-experimental: HxCtrl w/ population data. | 13-17 yrs, USA. n=1500                                                | HIV, CT, GC, syphilis | IknowUshould2: social-media campaign w/ website for STI info & clinic locator.                                                                  | ATT testing: Attendance rate.<br>Acceptability: Number of followers.                                     | More syphilis tests (18.8% vs. 5.4%; p<0.01) and HIV tests (19.0% vs. 5.4%; p<0.01). No change for CT & GC / Effective.<br>1500+ unique website interactions. 128 FB likes; 46 Twitter followers; 390 Youtube views; 42 Instagram followers.                                                                                                                                                                                     |
| <b>Social media campaign</b>           | Elliot 2016    | Cross-sectional study.                         | MSM, GBR. n=17361                                                     | HIV                   | Promotion through Gaydar, Grindr, Recon and FB pages to order free postal HIV home sampling kits                                                | ATT testing: Participation rate.<br>Acceptability: Self-report.                                          | 10 323/11 127 (93%) ordered HIV sample kit. 5696/10 323 (55%) returned sample kit within 24M. 82/5696 (1.4%) confirmed new diagnosis and in care.<br>59.7% would recommend to someone expected to test positive (93.8% if expected to negative). 64% clicked for more info on test. / Moderately acceptable.                                                                                                                     |
| <b>Social media campaign</b>           | Huang 2016     | Cross-sectional                                | ≥18yrs, Black/African American or Hispanic/Latino MSM, USA. n=122     | HIV                   | Promoting of HIV self-testing for 6W on Grindr + study website to order self-test kit                                                           | ATT testing: Participation rate.<br>Acceptability: Number of followers<br>Feasibility: Completion rate.  | 122 requested tests; 55/57 HIV-, 2/57 HIV+.<br>11 939 unique website visitors; 2.8% click-through rate<br>334 tests requested.<br>122/334 visitors were eligible and completed baseline survey, 81/122 confirmed receiving self test kit, 57/122 completed follow-up survey / Less feasible.                                                                                                                                     |
| <b>Social media campaign</b>           | Jones 2015     | Cross-sectional study.                         | MSM, GBR. n=305                                                       | HIV                   | Health promotion and offer of rapid at-home testing via FB, Grindr, and Squirt.                                                                 | ATT testing: Participation rate.<br>Acceptability: Number of followers.<br>Feasibility: Completion rate. | 5/5 high risk sexual behavior but tested HIV negative; 1/5 never tested before; 3/5 not tested in many yrs.<br>103 clicked FB survey; 152 approached on Grindr; 50 Squirt contacts.<br>FB: 6/103 completed survey; 3/6 requested HIV test; 2/3 made appointment. Grindr: 20/152 engaged; 6/20 requests for at home test; 3/6 made appointment. Squirt: 3/50 engaged and 0/3 test requests / Less feasible.                       |
| <b>Social media campaign</b>           | Rhodes 2016    | Quasi-experimental.                            | MSM & transgender, USA n=339 (Int) n=286 (Ctrl)                       | HIV                   | Posting info and answering questions on HIV testing on social media sites (Adam4Adam, BlackGayChat, Craigslist, and Gay.com).                   | ATT testing: Self-report.                                                                                | 63.7% of intervention participants reported past 12M HIV testing compared with 42.0% of control.<br>Adjusted OR= 2.9 (1.8-4.7)/ Effective.                                                                                                                                                                                                                                                                                       |
| <b>Social media campaign + website</b> | Rosengren 2016 | Cross-sectional                                | Black or Hispanic MSM 18+ yrs, USA n=56                               | HIV                   | Promotion of free rapid HIV self-testing kits on Grindr and offer of delivery via study website (kit, voucher or pin for smart vending machine) | ATT testing: Self-report.<br>Feasibility: Completion rate.<br>ART in TNPs: Self-report.                  | All 56 reported testing completion (100%); 2/56 reported positive result and linkage to care (confirmatory testing and ART initiation)<br>4389 visited the website; 333 requested test (i.e. 1 in 13 visitors); 56 completed survey 2W after request/ Less feasible.<br>Higher adherence at 3M & 6M (71.2% vs. 63.9%, d=0.17; 70.3% vs. 66.6%, d=0.09)                                                                           |
| <b>Mobile phone application</b>        | Himelhoch 2016 | RCT                                            | 18-64yrs, history of drug/alcohol use, HIV+, USA. n=19(Int) n=9(Ctrl) | HIV                   | Heart2HAART mobile application for ART adherence                                                                                                | ART in NAPs: Pill count<br>Acceptability: Self-report.<br>Feasibility: Response rate.                    | No significant difference in adherence between intervention and control group (p=0.29), but adherence was 100% in both at 3M / No impact<br>94.3% strongly agreed/agreed Heart2HAART helped them take their medication / Highly acceptable.<br>App was used on avg 21.4, 19.1 and 16.4 times in months 1, 2 and 3. Participants responded to medication prompts on avg 18, 16 and 14 times during months 1,2 and 3 respectively. |

|                                        |                         |                             |                                                                                     |     |                                                                                                                           |                                                            |                                                                                                                                                                                      |
|----------------------------------------|-------------------------|-----------------------------|-------------------------------------------------------------------------------------|-----|---------------------------------------------------------------------------------------------------------------------------|------------------------------------------------------------|--------------------------------------------------------------------------------------------------------------------------------------------------------------------------------------|
| <b>Avatar-guided computer software</b> | Kurth 2014              | RCT                         | HIV+ 18+ yrs, USA. n=120(Int) n=120(Ctrl)                                           | HIV | Audio narrated risk assessment, skill building videos, tailored feedback and printouts vs. computer risk assessment only. | ART in PVLA: VL.                                           | Non-significant change. (log10VL= -0.06(-0.4 to -0.3), p=0.74). Significant in subgroup w/ detectable VL at baseline (-0.73(-1.42 to -0.03), p=0.041) / No impact.                   |
|                                        |                         |                             |                                                                                     |     |                                                                                                                           | ART in PVLA: Self-report.                                  | Increased adherence. (4.71(0.95- 8.48) increase vs. 1.39(6.03 to 3.24) decrease; p=0.046) / Effective.                                                                               |
|                                        |                         |                             |                                                                                     |     |                                                                                                                           | PB: Self-report.                                           | Lower odds of HIV transmission (OR=0.46 (0.25-0.84), p=0.012) / Effective.                                                                                                           |
|                                        |                         |                             |                                                                                     |     |                                                                                                                           | Acceptability: Self-report.                                | 97% reported ease of use and high privacy; 99% satisfied w/ session length; 75% preferred it over human counsellor / Highly acceptable.                                              |
|                                        |                         |                             |                                                                                     |     |                                                                                                                           | Feasibility: Retention rate.                               | 87.1% retention / Highly feasible.                                                                                                                                                   |
| <b>Avatar-guided computer program</b>  | Naar-King 2012          | RCT                         | HIV+ 16-24 yrs, USA. n=36(Int) n=40(Ctrl)                                           | HIV | 2-D animated character delivering personalized health feedback vs. character giving nutrition info.                       | ART in TNPs: VL.                                           | Larger suppression rate. (Cohen's d=0.09 at 3M; d= 0.28 at 6M). Larger drop in VL from baseline (d=0.39 at 3M & d=0.19 at 6M).                                                       |
|                                        |                         |                             |                                                                                     |     |                                                                                                                           | ART in TNPs: Self-report.                                  | Higher adherence at 3M & 6M (71.2% vs. 63.9%, d=0.17; 70.3% vs. 66.6%, d=0.09)                                                                                                       |
|                                        |                         |                             |                                                                                     |     |                                                                                                                           | Acceptability: Self-report.                                | Mean satisfaction ratings 3.7 out of 4 / Highly acceptable.                                                                                                                          |
| <b>Mobile phone application</b>        | Perera 2014             | RCT                         | HIV+, NZ. n=17(Int) n=11(Ctrl)                                                      | HIV | ART adherence app w/ medication clock & graphs on disease-state vs. standard app (medication clock only)                  | ART in PVLA: Self-report.                                  | Increased adherence (F(1,23)=5.37, p=0.03) / Effective.                                                                                                                              |
|                                        |                         |                             |                                                                                     |     |                                                                                                                           | ART in PVLA: Pharmacy refills.                             | No difference. (F(1,25)=1.88, p=0.18) / No impact.                                                                                                                                   |
|                                        |                         |                             |                                                                                     |     |                                                                                                                           | ART in PVLA: VL.                                           | Lower VL at 3M (F(1,23)=5.62, p=0.023) / Effective.                                                                                                                                  |
|                                        |                         |                             |                                                                                     |     |                                                                                                                           | ART in PVLA: Composite score (refills, VL, & self-report). | Increased adherence (53% to 13%, X2(1,15)=6, p=0.03). No change in Ctrl (27% to 27%, X2(1,11)=0.00, p>0.99) / Effective.                                                             |
|                                        |                         |                             |                                                                                     |     |                                                                                                                           | Acceptability: Self-report.                                | More satisfying (on 11 point-scale: 5.88 vs. 3.27, p=0.017) and informative (6 vs. 3, p=0.034) at 3M than standard app / Highly acceptable.                                          |
| <b>Mobile app + cash incentive</b>     | Brayboy 2017            | UnCtrlled trial.            | 12-17yrs, USA. n=17                                                                 | STI | GirlTalk mobile phone app to assess knowledge increase                                                                    | PB: Self-report.                                           | 75.6% to 79% increase in knowledge pre and post app use at 2W. / No impact.                                                                                                          |
|                                        |                         |                             |                                                                                     |     |                                                                                                                           | Acceptability: Self-report.                                | 94.1% would use the app again/recommend it / Highly acceptable                                                                                                                       |
| <b>Social media</b>                    | Jones 2012              | Quasi-experimental: HxCtrl. | 15-24 yrs, USA. n=70/896 FB friends                                                 | CT  | Educational FB site addressing safe sexual health.                                                                        | PB: Self-report.                                           | Condom from 57% to 80%. 54% reduction in CT in ages 15-17 from previous yrs (but 42% less tests done).                                                                               |
| <b>Videos vs. SMS</b>                  | Jones 2013              | RCT                         | High-risk urban African-American women 18-29 yrs, USA. n=117(Soap opera) n=121(SMS) | HIV | Weekly soap opera episodes (Love, Sex & Choices) vs. HIV prevention SMS.                                                  | PB: Self-report.                                           | 18% greater reduction in Int. group, p=0.23 / No impact. 78% reduction in risky acts from baseline in Int. group (p<0.001); 72% reduction from baseline in Ctrl (p<0.001)/ Effective |
|                                        |                         |                             |                                                                                     |     |                                                                                                                           | Acceptability: Self-report.                                | 97.4% liked the videos / Highly acceptable.                                                                                                                                          |
| <b>Social media + video chat</b>       | Lelutiu-Weinberger 2014 | UnCtrlled trial.            | MSM 18-29 yrs, high risk for STI, USA. n=31                                         | HIV | miCHAT: FB chat Int. 8 motivational interviews to reduce HIV risk + CBT training.                                         | PB: Self-report.                                           | Decrease in unprotected anal sex acts (3.11 vs. 8.96; p=0.042). Increased knowledge of sexual risk (p=0.01) / Effective.                                                             |
|                                        |                         |                             |                                                                                     |     |                                                                                                                           | Acceptability: Self-report.                                | All felt privacy was ensured / Highly acceptable.                                                                                                                                    |
|                                        |                         |                             |                                                                                     |     |                                                                                                                           | Feasibility: Completion rate.                              | 46% completed baseline assessment + minimum 5 sessions / Less feasible.                                                                                                              |

|                                                         |               |                    |                                                           |                         |                                                                                                                                                                    |                                 |                                                                                                                                                                                                                                                                        |
|---------------------------------------------------------|---------------|--------------------|-----------------------------------------------------------|-------------------------|--------------------------------------------------------------------------------------------------------------------------------------------------------------------|---------------------------------|------------------------------------------------------------------------------------------------------------------------------------------------------------------------------------------------------------------------------------------------------------------------|
| <b>Social media campaign + website + cash incentive</b> | Solorio 2016  | Feasibility study. | Hispanic MSM, 18-30 yrs, USA<br>n=50                      | HIV                     | Radio & social media-based campaign for 16W to encourage testing & condom use + website w/clinic locator to provide free HIV home testing kits and linkage to care | PB: self-report.                | No significant change in condom use at 16W (26.1% vs. 15.65, OR=1.9 (0.6-5.9))/ No impact.                                                                                                                                                                             |
|                                                         |               |                    |                                                           |                         |                                                                                                                                                                    | Feasibility: Self-report.       | 32/50 (64%) requested HIV home testing kit, 28/32 (88%) completed the test/ Moderately feasible.                                                                                                                                                                       |
| <b>Mobile app</b>                                       | Jeon 2016     | RCT.               | Chronic HBV+, 19-60 yrs, KOR<br>n=26 (Int)<br>n=27 (Ctrl) | HBV                     | App to increase disease knowledge, set alarm medication reminders, record lab nutrition & physical activity data, and chat with other users.                       | Self-care: Self-report.         | Significantly higher self-care performance in intervention vs. control (t=3.597, p=0.001)/ Effective.                                                                                                                                                                  |
|                                                         |               |                    |                                                           |                         |                                                                                                                                                                    | Feasibility: Utilisation rate.  | Average monthly utilisation rate was 75.1%/ Highly feasible.                                                                                                                                                                                                           |
| <b>Social media</b>                                     | Henwood 2016  | Feasibility study. | 12-25 yrs, HIV+, ZAF<br>n=90                              | HIV                     | Use of MXit as support group for HIV+ youth                                                                                                                        | Acceptability: Self-report.     | 84% would like chat-room to continue / Highly acceptable.                                                                                                                                                                                                              |
|                                                         |               |                    |                                                           |                         |                                                                                                                                                                    | Feasibility: Participation rate | 33% ever visited MXit chat-room / Less feasible.                                                                                                                                                                                                                       |
| <b>Mobile app + cash incentive</b>                      | Przybyla 2016 | Feasibility study. | HIV + on ART, 18+ yrs, USA<br>n=27                        | HIV                     | DRUM app to report daily on ART adherence and substance abuse.                                                                                                     | Acceptability: Self-report.     | 84% reported the app was easy to use; 96% were satisfied; 92% would use it in the future/ Highly acceptable.                                                                                                                                                           |
|                                                         |               |                    |                                                           |                         |                                                                                                                                                                    | Feasibility: Completion rate.   | Overall completion rate of daily reports after 2W= 95.3%/ Highly feasible.                                                                                                                                                                                             |
| <b>Telemedicine</b>                                     | Talal 2016    | Feasibility study. | Individuals on opioid agonist tx, USA<br>n=54             | HCV                     | Telemedicine-based medical tx with hepatologist                                                                                                                    | Acceptability: Self-report.     | 88.9% prefer medical tx using telemedicine vs. clinic visit; 100% would recommend it to a friend/ Highly acceptable.                                                                                                                                                   |
|                                                         |               |                    |                                                           |                         |                                                                                                                                                                    | Feasibility: Completion rate.   | 54 tested HCV+ over 14M; 81.5% started evaluation/tx; 75% of those given tx have completed it/ Highly feasible.                                                                                                                                                        |
| <b>Social media</b>                                     | Garett 2016   | Feasibility study. | 18+yrs, MSM, PER<br>n=102(Int)<br>n=109(Ctrl)             | HIV                     | 12W FB based peer-led intervention to increase HIV testing and prevention behaviour.                                                                               | Acceptability: Self-report.     | Intervention group felt they learned more about; where to receive sexual health services (p-value=0.0061), more likely to have safe sex (p-value=0.034) and more likely to get tested for HIV regularly (p-value=0.021) compared to control group / Highly acceptable. |
| <b>Website</b>                                          | Polilli 2016  | Feasibility study. | Residents of Abruzzo Region, ITA<br>n=3500                | HIV, syphilis, HBV, HCV | Website with STI info, risk calculator, and appointments booking at testing sites.                                                                                 | Feasibility: Completion rate.   | 3500 booked an appointment; 3046 (87%) presented for testing within 15M study period/ Highly feasible.                                                                                                                                                                 |

**Note:** Int= intervention; Ctrl= control; HxCtrl= historical control; PB= preventative behaviors (i.e. risk reduction); PN= partner notification; TAT= turnaround time; ATT= attendance rate; ART= ART adherence; NAPs= non-adherent patients; AP= adherent patients; PVLA= Patients with various levels of adherence; TNPs= Treatment naive patients; VL= viral load; CD4= CD4 cell count; PC= phone call; FB= Facebook.

| Basic mHealth Innovation    | Author       | Study Design                           | Participants/<br>Country                                                                       | STBBI              | Intervention                                                                                                                                         | Measure/Metric                                                               | Results (MD=Mean difference, RR=risk ratio, IRR=incidence rate ratio, HR=hazard ratio, SD= standard deviation, 95% CI when presented. M=months, W=weeks)                                                                                                                                                 |
|-----------------------------|--------------|----------------------------------------|------------------------------------------------------------------------------------------------|--------------------|------------------------------------------------------------------------------------------------------------------------------------------------------|------------------------------------------------------------------------------|----------------------------------------------------------------------------------------------------------------------------------------------------------------------------------------------------------------------------------------------------------------------------------------------------------|
| <b>SMS</b>                  | Bailey 2014  | UnCtrlled trial.                       | CT+ at clinic, AUS.<br>n=64                                                                    | CT                 | SMS reminders to recall for treatment.                                                                                                               | ATT treatment:<br>Attendance rate.<br>Feasibility: Response rate.            | 100% treated for CT infection. 72% treated within 1 day of SMS.<br>94% replied to SMS, 84% the same day / Highly feasible.                                                                                                                                                                               |
| <b>SMS + PC</b>             | Bassett 2016 | RCT                                    | ≥18yrs, ZAF.<br>n=543(Int)<br>n=471(Ctrl)                                                      | HIV/TB             | 5 scheduled PC) and 4 SMS, reminders to retrieve test results and attend appointments, over 4M.                                                      | ATT treatment:<br>Attendance rate.                                           | No significant difference in reaching outcome at 9M (3M ART treatment or 3+6M of TB treatment) between intervention and control (39% vs 42%, RR=0.93, 95%CI 0.80-1.08) / No Impact                                                                                                                       |
| <b>SMS + PC</b>             | Bigna 2014   | RCT                                    | Caregivers of HIV + children 18+ yrs, CMR.<br>n=61(SMS+PC)<br>n=60(PC) n=60(SMS)<br>n=61(Ctrl) | HIV                | SMS+PC, SMS, or PC appointment reminders.                                                                                                            | ATT FU appointment:<br>Attendance rate.                                      | Improved attendance. (OR=2.9 (1.3-6.3), p=0.012) / Effective.                                                                                                                                                                                                                                            |
| <b>SMS</b>                  | Brook 2013   | Quasi-experimental:<br>HxCtrl.         | Sexual health clinic, GBR. n=207(Int)<br>n=169(HxCtrl)                                         | HIV, syphilis, HBV | SMS reminders.                                                                                                                                       | ATT testing:<br>Attendance rate.                                             | Higher retesting rate (41% vs. 28%; p<0.001) / Effective.                                                                                                                                                                                                                                                |
| <b>SMS</b>                  | Brook 2013   | Quasi-experimental:<br>HxCtrl.         | Sexual health clinic, GBR.n=699(Int)<br>n=768(HxCtrl)                                          | HIV                | SMS reminders 2 days before appointment.                                                                                                             | ATT FU appointment: LTFU rate.                                               | 35% improvement in overall LTFU rate (26% to 17%; p<0.0001) / Effective.                                                                                                                                                                                                                                 |
| <b>SMS</b>                  | Burton 2013  | Quasi-experimental:<br>HxCtrl.         | High risk for STI at clinic, GBR.<br>n=273(Int)<br>n=266(Ctrl)                                 | CT, GC             | SMS STI testing reminders.                                                                                                                           | ATT: testing:<br>Attendance rate.                                            | No change in retesting rates for those w/ recent CT or GC. (CT: 36% vs.33%; p=0.79) (GC: 19% vs. 33%; p=0.48) / No impact.                                                                                                                                                                               |
| <b>SMS</b>                  | Coleman 2017 | Retrospective Quasi-experimental       | >=18 yrs, HIV+ pregnant women, ZAF.<br>n=192(Int)<br>n=447(Ctrl)                               | HIV                | Bi-weekly maternal health info sent throughout pregnancy and for one year after birth to increase HIV PCR testing postpartum and increase ANC visits | ATT testing:<br>Attendance rate.<br>PB: Infection rate                       | 81.3% vs 75.4% in intervention vs control group likely to attend first PCR 6W postpartum. 40% increase in the likelihood of attending the recommended four ANC visits among individuals within the intervention group (RR: 1.41, CI: 1.15–1.72) / Effective.<br>3 infants born with HIV in control group |
| <b>SMS</b>                  | Desai 2014   | Quasi-experimental:<br>Conc. + HxCtrl. | High risk MSM at clinic, GBR. n=31(Int)<br>n=656(Conc. Ctrl)<br>n=745(HxCtrl)                  | HIV                | SMS HIV/STI testing reminders.                                                                                                                       | ATT testing:<br>Attendance rate.                                             | No significant change in re-testing odds. (32% in SMS vs.30% in Conc. Ctrl; OR=1.1(0.5-2.4) and 17% in HxCtrl; OR=2.3(1.0-4.9) / No impact.                                                                                                                                                              |
| <b>SMS + cash incentive</b> | Downing 2013 | RCT                                    | CT + or suspected at clinic 16+ yrs, AUS.<br>n=30(Int) n=32(Ctrl)                              | CT                 | SMS appointment reminders + \$10 if attended.                                                                                                        | ATT testing:<br>Attendance rate.                                             | Increased re-testing rate at 10-12W post CT treatment (without cash 26.7% vs. 6.3% in Ctrl; p=0.04); (with cash 28.1% vs. 6.3% in Ctrl; p=0.043) / Effective.                                                                                                                                            |
| <b>SMS</b>                  | Evans 2015   | UnCtrlled trial.                       | African community, GBR. n=172                                                                  | HIV                | 2 weekly Health Belief Model SMS to reduce risky sexual behaviours.                                                                                  | ATT testing: Self-report.<br>PB: Self-report.<br>Acceptability: Self-report. | 10.5% reported being tested for HIV during/after the 12W Int.<br>Non-significant increase in HIV knowledge & attitudes / No impact.<br>Acceptable & useful. Majority shared w/ others and want to get tested in future.                                                                                  |

|                   |                              |                                        |                                                                                                                              |     |                                                                                                                      |                                                                                                                                  |                                                                                                                                                                                                                                                                                                                                                                                                                                                            |
|-------------------|------------------------------|----------------------------------------|------------------------------------------------------------------------------------------------------------------------------|-----|----------------------------------------------------------------------------------------------------------------------|----------------------------------------------------------------------------------------------------------------------------------|------------------------------------------------------------------------------------------------------------------------------------------------------------------------------------------------------------------------------------------------------------------------------------------------------------------------------------------------------------------------------------------------------------------------------------------------------------|
| <b>SMS</b>        | Farmer 2014                  | Quasi-experimental:<br>HxCtrl.         | HIV clinic attendees,<br>GBR. n=951(Int)<br>n=822(HxCtrl)                                                                    | HIV | SMS reminder 2 days<br>before appointment.                                                                           | ATT FU<br>appointment: LTFU<br>& cancellation rate.                                                                              | No difference in LTFU (25% vs.28%) or cancellation (62% vs.64%) / No impact.                                                                                                                                                                                                                                                                                                                                                                               |
| <b>SMS</b>        | Finocchario-<br>Kessler 2014 | Quasi-experimental:<br>HxCtrl.         | HIV+ mother-infant<br>pairs, KEN.<br>n=523(Int)<br>n=320(HxCtrl)                                                             | HIV | SMS notification of<br>available test results and<br>appointment reminder.                                           | ATT treatment:<br>Attendance rate.<br>TAT: Time from test<br>to diagnosis & test to<br>treat.<br>Feasibility: Retention<br>rate. | More infants initiated on ART (Urban: 11/11 vs. 1/7, p<0.001; Peri-urban: 14/14 vs. 9/14, p<0.05) / Effective.<br>Shorter median time to diagnosis (5 vs. 6.3W (urban) & 3.4 vs. 8.1W (peri-urban); both p<0.001). Shorter median time to treat (13 vs. 40 days (urban) & 1 vs. 36 days (peri-urban); p<0.001) / Effective.<br>Retention rate double at 9M post-natal (45.1% vs. 93% (urban) and 43.2% vs. 94.1% (peri-urban); p<0.001) / Highly feasible. |
| <b>SMS</b>        | Guy 2012                     | Quasi-experimental:<br>HxCtrl.         | STI clinic, AUS.<br>n=141(Int)<br>n=338(HxCtrl)                                                                              | CT  | SMS re-testing reminder<br>3M after initial infection.                                                               | ATT testing:<br>Attendance rate.                                                                                                 | Higher retesting rate (30% 1-4M post-infection vs. 21%; p=0.04); AOR=1.57(1.01-2.46) / Effective.                                                                                                                                                                                                                                                                                                                                                          |
| <b>SMS</b>        | Joseph Davey<br>2016         | RCT.                                   | HIV+ adults on ART,<br>MOZ<br>n=416 (Int)<br>n=414 (Ctrl)                                                                    | HIV | SMS reminders 2 and 7<br>days of appointment and<br>ART drug-pick up +<br>educational SMS every<br>2M.               | ATT treatment:<br>Attendance rate.                                                                                               | Nonsignificant difference in overall retention in care at 12 M (93.8% vs 91%, p=0.139)/ No impact.                                                                                                                                                                                                                                                                                                                                                         |
| <b>SMS</b>        | Kapman 2016                  | Quasi-experimental:<br>HxCtrl.         | Heterosexual clinic<br>attendees dx & tx for<br>CT, 16-23 yrs, NLD<br>n=828 (Int)<br>n=1530 (Ctrl)                           | CT  | 2 SMS reminders at<br>5.5M & 6M after initial<br>dx with CT for retesting<br>appointment scheduling<br>& attendance. | ATT testing:<br>Attendance rate.                                                                                                 | Higher attendance rate between 5-8M after initial dx (30.6% vs. 9.2%).                                                                                                                                                                                                                                                                                                                                                                                     |
| <b>SMS</b>        | Kharbanda 2011               | Quasi-experimental:<br>Conc. + HxCtrl. | Parents of girls 9-20<br>yrs at clinics, USA.<br>n=124(Int)<br>n=308(Conc. Ctrl)<br>n=1080(HxCtrl)                           | HPV | Up to 3 weekly SMS<br>vaccination reminders.                                                                         | ATT vaccination:<br>Attendance rate.                                                                                             | More likely to get vaccine on time after controlling for insurance and site of care (AOR=1.83(1.23-2.71)) / Effective.                                                                                                                                                                                                                                                                                                                                     |
| <b>SMS</b>        | Kliner 2013                  | Quasi-experimental:<br>HxCtrl.         | HIV+ at hospital,<br>SWZ. n=162(Int)<br>n=297(HxCtrl)                                                                        | HIV | SMS reminders one day<br>before appointment.                                                                         | ATT FU<br>appointment:<br>Attendance rate.                                                                                       | No difference. SMS 83.3% vs. Ctrl 80.1%; p=0.401. AOR=1.13, p=0.662 / No impact.                                                                                                                                                                                                                                                                                                                                                                           |
| <b>SMS</b>        | Matheson 2014                | Quasi-experimental.                    | 11-22 yrs at clinic,<br>USA.<br>n=37(Int) n=232(Ctrl)                                                                        | HPV | SMS vaccination<br>reminders (3 SMS per<br>dose).                                                                    | ATT vaccination:<br>Attendance rate.                                                                                             | Higher attendance rate. HPV2 vaccine complete: 73% vs.34%, (p=0.000); on-time HPV2 38% vs. 25%, (p=0.035). HPV3 complete 16% vs.6%, (p=0.018); on-time HPV3 14% vs.3%, (p=0.007) / Effective.                                                                                                                                                                                                                                                              |
| <b>SMS</b>        | McIver 2016                  | Quasi-experimental:<br>HxCtrl.         | Clinic attendees<br>susceptible to HBV<br>(HIV+, bisexual,<br>CSW, IDUs,<br>Aboriginals), AUS<br>n=241 (Int)<br>n=463 (Ctrl) | HBV | SMS reminders 1 day<br>before appointment for<br>HBV vaccine doses 2&3<br>reattendance.                              | ATT vaccination:<br>Attendance rate.                                                                                             | Nonsignificant decrease in attendance rate within 12 M (54% vs 56% for 2 doses, p=0.65/ 24% vs 30% for 3 doses, p=0.07)/ No impact<br>Nonsignificant difference in completion of 3 doses in 12M. aOR= 0.7 (0.48-1.01)/No impact.                                                                                                                                                                                                                           |
| <b>SMS</b>        | Njuguna 2016                 | RCT.                                   | Rural women, 18-24<br>yrs, KEN<br>n=300 (Int)<br>n=300 (Ctrl)                                                                | HIV | Weekly SMS on HIV<br>and reproductive health.                                                                        | ATT testing: Self-<br>report.                                                                                                    | Significant increase in reported testing at 6M (67% vs 51%, aHR=1.54(1.25-1.90)/ Effective.                                                                                                                                                                                                                                                                                                                                                                |
| <b>SMS vs. PC</b> | Norton 2014                  | RCT                                    | HIV+, 17+ yrs, USA.<br>n=25(Int) n=27(Ctrl)                                                                                  | HIV | SMS appointment<br>reminder vs. message to<br>home phone.                                                            | ATT FU<br>appointment:<br>Attendance rate.                                                                                       | No difference (72% vs. 81%, p=0.42) but patients already had high attendance rate / No impact.                                                                                                                                                                                                                                                                                                                                                             |

|                 |                |                                        |                                                                                                                                                 |          |                                                                         |                                                                                                     |                                                                                                                                                                                                                                                                                                                                                                                                                                     |
|-----------------|----------------|----------------------------------------|-------------------------------------------------------------------------------------------------------------------------------------------------|----------|-------------------------------------------------------------------------|-----------------------------------------------------------------------------------------------------|-------------------------------------------------------------------------------------------------------------------------------------------------------------------------------------------------------------------------------------------------------------------------------------------------------------------------------------------------------------------------------------------------------------------------------------|
| <b>SMS</b>      | Nyatsanza 2016 | Quasi-experimental:<br>HxCtrl.         | MSM & CSW at high-risk of STI, GBR<br>n=266 (Int)<br>n=273 (Ctrl)                                                                               | HIV/STI  | Personalised SMS reminders for reattendance.                            | ATT testing:<br>Attendance rate.                                                                    | Significantly higher reattendance rate at 6M (56% vs. 33%, p<0.001)/ Effective.                                                                                                                                                                                                                                                                                                                                                     |
| <b>SMS</b>      | Odeny 2012     | RCT                                    | Males circumcised at clinic 18+ yrs, KEN.<br>n=600(Int)<br>n=600(Ctrl)                                                                          | HIV      | Daily SMS for 1W.                                                       | ATT FU<br>appointment:<br>Attendance rate.<br>PB: Self-report.                                      | Improved attendance within 3 days of post-operative clinic appointment: 65.4% vs.59.7% (RR=1.09(1.00–1.20); p=0.04) / Effective.<br>Abstinence of sexual activity before FU: 28.3% vs. 25.2% (RR=1.13(0.91–1.38), p=0.3) / No impact.                                                                                                                                                                                               |
| <b>SMS</b>      | Rand 2015      | RCT                                    | 11-16 yrs at clinic, USA. n=1893(Int)<br>n=1919(Ctrl)                                                                                           | HPV      | SMS appointment reminders.                                              | ATT vaccination:<br>Attendance rate.                                                                | Higher HPV1 vaccination rate (16% vs. 13%; HR= 1.3(1.0-1.6); p=0.04) / Effective.                                                                                                                                                                                                                                                                                                                                                   |
| <b>SMS/PC</b>   | Rand 2016      | RCT.                                   | Clinic attendees<br>Parents of youth 11-17 yrs who received 1st HPV vaccine, USA.<br>n=191 (SMS)<br>n=200 (Ctrl);<br>n=178 (PC)<br>n=180 (Ctrl) | HPV      | SMS appointment reminders to receive 3 doses of HPV vaccine over 2 yrs. | ATT vaccination:<br>Attendance rate.<br>TAT: Time from enroll to completion of 3 vaccines.          | SMS: Significant difference in vaccination rates compared to control (49% vs 30%, p=0.001)/ Effective.<br>PC: No difference in vaccination rates compared to control (48% vs 40%, p=0.34)/ No impact.<br>SMS: Significant difference in time taken to complete 3 HPV doses (71 days earlier than control, p<0.001)/ Effective.<br>PC: No difference in time taken to complete 3 HPV doses compared to control ( p=0.08)/ No impact. |
| <b>SMS + PC</b> | Schwartz 2015  | Quasi-experimental:<br>HxCtrl.         | HIV+ pregnant women on ART, ZAF.<br>n=50                                                                                                        | HIV      | SMS messages and PCs from a case manager (CM) through 6W postpartum.    | ATT testing:<br>Attendance rate.<br>Acceptability: Self-report.<br>Feasibility:<br>Completion rate. | More infant testing (90.0% vs. 63.3% at 10W; p<0.01) / Effective.<br>Helpful to have CM support during pregnancy and postpartum (98%) / Highly acceptable.<br>96% completed postpartum questionnaire / Highly feasible.                                                                                                                                                                                                             |
| <b>SMS + PC</b> | Segaren 2012   | UnCtrlled trial.                       | Mothers of HIV+ infants, HTI. n=108                                                                                                             | HIV      | Cell phones + regular PC for monitoring of mother & child.              | ATT treatment:<br>Attendance rate.<br>Acceptability: Self-report.                                   | All 76 w/ active phones were adherent to treatment (attended 6/6 monthly hospital appointments).<br>70% phones active after Int.; good for med reminders (63%) / Moderately acceptable.                                                                                                                                                                                                                                             |
| <b>SMS + PC</b> | Smillie 2014   | UnCtrlled trial.                       | HIV+ in clinic 14+ yrs, CAN. n=20                                                                                                               | HIV      | Weekly PC or SMS for 6M.                                                | ATT FU<br>appointment: Self-report.<br>Acceptability: Self-report.<br>Feasibility: Self-report.     | 65% said SMS had no effect on attendance.<br>Beneficial for appointment scheduling (80%) & reminder (75%). All would recommend to a friend / Highly acceptable.<br>75% had no difficulty in receiving and responding to SMS / Highly feasible.                                                                                                                                                                                      |
| <b>SMS</b>      | Tolly 2012     | RCT                                    | Randomly sampled adults (existing database), ZAF.<br>n=438(in each of 4 Int.)<br>n=801(Ctrl)                                                    | HIV      | 3 or 10 motivational or informational SMS.                              | ATT testing: Self-report.<br>Feasibility: Self-report.                                              | Improved attendance in group receiving 10 motivational SMS at 3W: (69% vs. 57%; OR=1.7(1.10–2.390), p=0.0036) / Effective.<br>SMS motivated HIV counseling and testing uptake in 89% / Highly feasible.                                                                                                                                                                                                                             |
| <b>SMS</b>      | Vilella 2004   | Quasi-experimental:<br>Conc. + HxCtrl. | 18+ yrs at travel clinic, ESP. n=738(Int)<br>n=1610(Conc. Ctrl)<br>n=2247(HxCtrl)                                                               | HAV/ HBV | SMS reminders for vaccination appointments.                             | ATT vaccination:<br>Attendance rate.                                                                | Improved adherence for 3rd HepA+B dose. (47.1% vs. 26.9%, RR=1.75(1.41–2.17) in Conc. Ctrl and 23.6%(20.1–27.4), RR=2.00(1.63–2.45) in HxCtrl) / Effective.                                                                                                                                                                                                                                                                         |



|                             |                     |                                  |                                                           |     |                                                                        |                                                                                                             |                                                                                                                                                                                                                                                                                                                                                                                                                                                                                                                                                                                            |
|-----------------------------|---------------------|----------------------------------|-----------------------------------------------------------|-----|------------------------------------------------------------------------|-------------------------------------------------------------------------------------------------------------|--------------------------------------------------------------------------------------------------------------------------------------------------------------------------------------------------------------------------------------------------------------------------------------------------------------------------------------------------------------------------------------------------------------------------------------------------------------------------------------------------------------------------------------------------------------------------------------------|
| <b>SMS</b>                  | Ammassari 2010      | UnCtrlled trial.                 | HIV+, ITA. n=71                                           | HIV | SMS reminders.                                                         | ART in NAPs: Self-report.                                                                                   | Increased adherence over 9M. (93.2% vs.79.6%, p=0.003) / Effective.                                                                                                                                                                                                                                                                                                                                                                                                                                                                                                                        |
| <b>SMS</b>                  | Ammassari 2011      | UnCtrlled trial.                 | HIV+, 18+ yrs, ITA. n=145                                 | HIV | SMS reminders.                                                         | ART in NAPs: Self-report.<br>ART in NAPs: VL.<br>Acceptability: Self-report.                                | Increased adherence at 9M (94.9% vs.78.8%, p<0.001) / Effective.<br>More w/ undetectable VL at 9M (76.2% vs. 42.3%, p<0.001) / Effective.<br>>90% reporting SMS helpful / Highly acceptable.                                                                                                                                                                                                                                                                                                                                                                                               |
| <b>PC + cash incentives</b> | Belzer 2014         | RCT                              | HIV+ 12-29 yrs, USA. n=19(Int) n=18(Ctrl)                 | HIV | Daily PC reminders and referrals if necessary+ free phone & plan.      | ART in NAPs: Self-report.<br>ART in NAPs: VL.                                                               | Increased adherence for 1M & 3 M (OR=3.09(1.20-7.98); OR=2.85(1.02-7.97)) / Effective.<br>Lower VL at wk 24 and 48 (2.82 vs. 4.52, p=0.002; 3.23 vs. 4.23, p=0.043) / Effective.                                                                                                                                                                                                                                                                                                                                                                                                           |
| <b>SMS</b>                  | Cantudo-Cuenca 2016 | Retrospective quasi-exprimental. | HIV + on ART, ESP n=120 (Int&Ctrl)                        | HIV | SMS on ART adherence.                                                  | ART in PVLA: Pharmacy refills.                                                                              | Statistically sign relationship bt no SMS and ART adherence(OR= 0.35 (0.14-0.8), p=0.025) [multivariate analysis]/ Effective.                                                                                                                                                                                                                                                                                                                                                                                                                                                              |
| <b>SMS</b>                  | da Costa 2012       | RCT                              | HIV+ women, BRA. n=8(Int) n=13(Ctrl)                      | HIV | Daily SMS reminders.                                                   | ART in APs: Pill count.<br>ART in APs: MEM.<br>ART in APs: Self-report.<br>Acceptability: Self-report.      | Increased adherence over 4M (50% vs. 38.5%; p=0.604) / No impact.<br>Increased adherence over 4M (75% vs. 46%; p=0.195) / No impact.<br>Increased adherence (100% vs. 84.6% in Ctrl; p=0.244) / No impact.<br>82% believed SMS were helpful, 77% wanted to keep receiving SMS / Highly acceptable.                                                                                                                                                                                                                                                                                         |
| <b>SMS</b>                  | Downshen 2011       | UnCtrlled trial.                 | HIV+ 14-29 yrs, AUS. n=25                                 | HIV | Daily SMS ART reminder + FU SMS 1hr later.                             | ART in NAPs: Self-report.<br>ART in NAPs: VL + CD4 count.<br>Acceptability: Self-report.                    | Increased adherence (Baseline Mean=74.7; 12W Mean=93.3; 24WMean=93.1; p<0.001) / Effective.<br>Insignificant change in CD4 cell count & VL (mean VL= 2750, CD4= 502 to VL= 29, CD4= 545 at 24W, p=0.12) / No impact.<br>81% want SMS after study end. Helped decrease missed doses in 95% / Highly acceptable.                                                                                                                                                                                                                                                                             |
| <b>SMS</b>                  | Downshen 2011       | UnCtrlled trial.                 | HIV+ 14-29 yrs, AUS. n=25                                 | HIV | Daily SMS ART reminder + FU SMS 1hr later.                             | ART in NAPs: Self-report.<br>Feasibility: Completion & response rate.                                       | Decreased adherence (58.3% for 0-12W vs. 55.2% for 13-24W, p=0.53) / No impact.<br>84% completed all study visits. 61.4% response rate / Highly feasible.                                                                                                                                                                                                                                                                                                                                                                                                                                  |
| <b>SMS + cash incentive</b> | Garofalo 2016       | RCT                              | 16-29yrs, HIV+ on ART for ≥1M , USA. n=51(Int) n=54(Ctrl) | HIV | Daily personalised SMS over 6M to remind participants take medications | ART in NAPs: Self-report.<br>ART in NAPs: VL.<br>Acceptability: Self-report.<br>Feasibility: Response rate. | Significant difference in adherence compared to control at 3M OR=2.57 (1.01-6.54). Not significant at 6M OR=1.68 (0.69-4.09). Significant difference from baseline to 6M OR=2.12 (95% CI 1.01-4.45). / Effective.<br>No difference in log viral load or viral suppression compared to control at 3 and 6M / No impact.<br>100% would recommend intervention to those in need, 81 % wanted to continue getting the text messages after conclusion of the study, 95 % satisfied with the intervention overall / Highly acceptable<br>58% average response rate to SMS / Moderately feasible. |

|                                   |                |      |                                                                                        |     |                                                                                                                                                                              |                                                              |                                                                                                                                                                                                                                                                                        |
|-----------------------------------|----------------|------|----------------------------------------------------------------------------------------|-----|------------------------------------------------------------------------------------------------------------------------------------------------------------------------------|--------------------------------------------------------------|----------------------------------------------------------------------------------------------------------------------------------------------------------------------------------------------------------------------------------------------------------------------------------------|
| <b>SMS +PC</b>                    | Haberer 2016   | RCT  | ≥18yrs, HIV+ on ART, UGA.<br>n=21(Scheduled SMS)<br>n=20 (Triggered SMS)<br>n=21(Ctrl) | HIV | Scheduled SMS: 1M daily SMS, 2M weekly SMS, 6M SMS sent to patient and support if needed. Triggered SMS; SMS sent to patient and support if no signal received from monitor. | ART: MEM                                                     | Significant difference in scheduled SMS intervention compared to control (11.1% increase in adherence, 48-h and more than 96-h lapses were less frequent (IRR=0.6, p value=0.02 and IRR 0.3, P<0.001, respectively). Similar adherence in triggered SMS vs control group. / Effective. |
|                                   |                |      |                                                                                        |     |                                                                                                                                                                              | ART: VL                                                      | No significant differences in HIV RNA suppression among study arms (p value = 0.14). 47/62 participants virally suppressed at 3 and 9M / No impact.                                                                                                                                    |
| <b>SMS</b>                        | Hardy 2011     | RCT  | HIV+ 18+ yrs, USA.<br>n=12(SMS)<br>n=14(Beeper)                                        | HIV | SMS vs. beeper reminders.                                                                                                                                                    | ART in APs: Composite score (MEM+ pill count + self-report). | Higher adherence at 6W. (MD=27.1(7.6-46.6), p=0.009) / Effective.                                                                                                                                                                                                                      |
|                                   |                |      |                                                                                        |     |                                                                                                                                                                              | ART in APs: MEM.                                             | Increased adherence. (MD=33.4(14.1-52.6), p = 0.002) / Effective.                                                                                                                                                                                                                      |
|                                   |                |      |                                                                                        |     |                                                                                                                                                                              | ART in APs: Pill count.                                      | No difference. (MD=13.7(-6.7-34.1), p = 0.153) / No impact.                                                                                                                                                                                                                            |
|                                   |                |      |                                                                                        |     |                                                                                                                                                                              | ART in APs: Self-report.                                     | No difference. (MD=20.2 (-1.8-42.1), p = 0.069) / No impact.                                                                                                                                                                                                                           |
| <b>SMS</b>                        | Jeffries 2016  | RCT  | 15-24yrs, HIV+, USA.<br>n=91(Int) n=45(Ctrl)                                           | HIV | UCARE4LIFE daily mobile text messaging intervention over 3M to improve HIV care among youth                                                                                  | ART: VL                                                      | Significant difference in ART adherence in intervention vs control among non-adherent/new to ART at baseline (6M p=0.03). / Effective.<br>No sig difference in those on ART at baseline (6M p=0.119) /No impact.                                                                       |
| <b>PC</b>                         | Kalichman 2011 | RCT  | HIV+ 18+ yrs, USA.<br>n=21(Int) n=19(Ctrl)                                             | HIV | PC counselling.                                                                                                                                                              | Acceptability: Self-report.                                  | Mean score = 8.44 (SD=2.45) on 10 point Likert Scale for appointment reminder SMS./ Highly acceptable                                                                                                                                                                                  |
|                                   |                |      |                                                                                        |     |                                                                                                                                                                              | ART in NAPs: Pill count.                                     | No difference at 4M (F(1,36)=3.32, p<0.07) / No impact.                                                                                                                                                                                                                                |
| <b>PC</b>                         | Kassaye 2016   | RCT. | HIV+ pregnant women, KEN<br>n=280 (Int)<br>n=270 (Ctrl)                                | HIV | 3 to 6 weekly SMS (ART reminders, motivational, PMTCT, child health & nutrition).                                                                                            | Feasibility: Completion rate.                                | 99% completion rate / Highly feasible.                                                                                                                                                                                                                                                 |
|                                   |                |      |                                                                                        |     |                                                                                                                                                                              | ART in TNP: Self-report.                                     | Nonsignificant difference in adherence to ART at 34-36W gestation between the 2 groups (97.3% vs 99.6%, aRR= 1.25 (0.43-3.60)/No impact.<br>Nonsignificant difference in adherence to ART at delivery between the 2 groups (94.7% vs 100%, aRR=1.01 (0.88-1.16))./ No impact.          |
| <b>PC</b>                         | Kebaya 2014    | RCT  | HIV+ mothers in PMTCT, KEN.<br>n=75(Int) n=75(Ctrl)                                    | HIV | Bi-weekly PC.                                                                                                                                                                | ART in TNP: Self-report.                                     | Increased adherence (90.7% vs. 72%, p=0.005) / Effective.                                                                                                                                                                                                                              |
|                                   |                |      |                                                                                        |     |                                                                                                                                                                              | Feasibility: Retention rate.                                 | More likely to remain in treatment at 10W (69.3% vs 37.3%, p<0.001) / Moderately feasible.                                                                                                                                                                                             |
| <b>SMS</b>                        | Lester 2010    | RCT  | HIV+ 18+ yrs, KEN.<br>n=273(Int)<br>n=265(Ctrl)                                        | HIV | Weekly SMS.                                                                                                                                                                  | ART in TNP: Self-report.                                     | Improved adherence at 6M and 12M: RR=0.81(0.69-0.94) p=0.006 / Effective.                                                                                                                                                                                                              |
|                                   |                |      |                                                                                        |     |                                                                                                                                                                              | ART in TNP: VL.                                              | Lower virological failure (RR=0.84(0.71-0.99) p=0.04) and improved viral suppression (OR=0.71(0.5-1.01) p=0.058) / Effective.                                                                                                                                                          |
| <b>SMS + PC + cash incentives</b> | Maduka 2013    | RCT  | HIV+ at hospital 20+ yrs, NGA. n=52(Int)<br>n=52(Ctrl)                                 | HIV | 2 monthly counselling PCs + 2 weekly SMS+ cash incentives                                                                                                                    | ART in NAPs: Self-report.                                    | Increased adherence (76.9% vs. 55.8%, X2=5.211,p=0.022; RR=0.725(0.55-0.96)) / Effective.                                                                                                                                                                                              |
| <b>SMS + PC</b>                   | Mbuagbaw 2012  | RCT  | HIV+ 21+ yrs, CMR.<br>n=101(Int) n=99(Ctrl)                                            | HIV | Weekly motivational SMS. Phone number to call for support.                                                                                                                   | ART in NAPs: CD4 count.                                      | Improved CD4+ count (193-->575 cells/mL vs. 131-->361.5 cells/mL; p=0.007) / Effective.                                                                                                                                                                                                |
|                                   |                |      |                                                                                        |     |                                                                                                                                                                              | ART in PVLA: Self-report.                                    | No difference. (RR=1.06(0.89-1.29); p=0.542) / No impact.                                                                                                                                                                                                                              |
|                                   |                |      |                                                                                        |     |                                                                                                                                                                              | ART in PVLA: Pharmacy Refills.                               | No difference at 6 months (MD=0.1(-0.23-0.43); p=0.617) / No impact.                                                                                                                                                                                                                   |
|                                   |                |      |                                                                                        |     |                                                                                                                                                                              | Acceptability: Self-report.                                  | 91.1% believed SMS reminders helped; 65% were satisfied; 81.2% would recommend to a friend / Highly acceptable.                                                                                                                                                                        |

|                             |                      |                             |                                                                                  |     |                                                                                                                       |                                                                           |                                                                                                                                                                                                                                                                                |
|-----------------------------|----------------------|-----------------------------|----------------------------------------------------------------------------------|-----|-----------------------------------------------------------------------------------------------------------------------|---------------------------------------------------------------------------|--------------------------------------------------------------------------------------------------------------------------------------------------------------------------------------------------------------------------------------------------------------------------------|
| <b>SMS</b>                  | Moore 2015           | RCT                         | HIV+ bipolar 18+ yrs, USA.<br>n=25(Int) n=25(Ctrl)                               | HIV | SMS reminders.                                                                                                        | ART in PVLA: MEM.                                                         | No difference. (86.2% (SD= 12.7) vs. 84.8% (SD= 18.1); p=0.95; d=0.01) / No impact.                                                                                                                                                                                            |
| <b>SMS</b>                  | Nsagha 2016          | RCT.                        | HIV+ on ART, 18+yrs, CMR<br>n=45 (Int)<br>n=45 (Ctrl)                            | HIV | 4 weekly educative SMS over 1M.                                                                                       | ART in PVLA: Self-report.<br>Acceptability: Self-report.                  | Nonsignificant difference in adherence to ART at 1M between the 2 groups (64.4% vs 44.2%, p=0.056)/ No impact.<br>57.8% wished the SMS to continue/ Moderately acceptable                                                                                                      |
| <b>SMS</b>                  | Pop-Eleches 2010     | RCT                         | HIV+ 18+ yrs, rural KEN.<br>n=142(Daily SMS)<br>n=147(Weekly SMS)<br>n=139(Ctrl) | HIV | Daily or weekly SMS.                                                                                                  | ART in PVLA: MEM.<br>ART in PVLA: MEM.                                    | Increased adherence in weekly SMS group over 48W (53% vs. 40% p=0.03) / Effective.<br>No difference between daily SMS group and Ctrl (41% vs. 40% p=0.92) / No impact.                                                                                                         |
| <b>SMS + cash incentive</b> | Rana 2016            | UnCtrlled trial.            | HIV+, 18+yrs, USA.<br>n=32                                                       | HIV | Bi-directional weekly SMS appointment reminders, daily ART reminder & supportive messages.                            | ART in PVLA: Undetectable VL<br>ATT treatment: Attendance rate.           | Significant increase in the number of participants with undetectable VL at 6M (25 vs. 18, p=0.002)/ Effective.<br>20/32 completed all visits within 6M study period.                                                                                                           |
| <b>SMS</b>                  | Sabin 2015           | RCT                         | HIV+ 18+ yrs, in CHN. n=63(Int)<br>n=56(Ctrl)                                    | HIV | SMS reminders via MEM + adherence counselling.                                                                        | ART in PVLA: MEM.<br>ART in PVLA: VL.<br>ART in PVLA: CD4 count.          | Increased adherence over 6M (82% vs. 51.8%; RR=1.59(1.21- 2.10), p<0.001) / Effective.<br>No difference in undetectable VL (93.6% vs. 98.2%, p=0.218) / No impact.<br>Higher mean change in CD4 count (52 vs 28 cell/ $\mu$ L, p=0.297) / No impact.                           |
| <b>PC + MMS.</b>            | Shet 2014            | RCT                         | HIV+ 18-60 yrs, IND.<br>n=315(Int)<br>n=316(Ctrl)                                | HIV | Weekly automated motivational voice call, followed by weekly MMS.                                                     | ART in TNPs: VL.<br>ART in TNPs: Pill count.<br>Feasibility: PC received. | No difference. (Number of virological failures: 15.6% vs. 15.5%. Time to virological failure: aHR= 0.96(0.65-1.43), p= 0.85) / No impact.<br>No difference. (27% vs. 21.7%; aIRR=1.24(0.94-1.63), p=0.13) / No impact.<br>86% of calls received by patients / Highly feasible. |
| <b>SMS</b>                  | Walsh 2012           | UnCtrlled trial.            | HIV+ Adults on ART, GBR. n=14                                                    | HIV | Pill-box w/ MEM + weekly SMS wrt med taking + up to 3 late dose SMS reminders.                                        | ART in APs: Self-report + MEM.<br>Acceptability: Self-report.             | 99.5% baseline adherence, 98% at 24W. No difference in missed doses (4.8% in 0-12W; 6.3% in 13-24W)<br>64% satisfied, 50% found SMS & system useful. 55% found reminders irritating / Moderately acceptable.                                                                   |
| <b>SMS</b>                  | Lim 2008             | Quasi-experimental: HxCtrl. | STI clinic, NZL.<br>n=293(Int)<br>n=303(HxCtrl)                                  | CT  | SMS to contact clinic for CT test result.                                                                             | TAT: Time from test to treat.                                             | No change in median time to treat (3 days vs. 4 days, t = - 1.3, p<0.1) / No impact.                                                                                                                                                                                           |
| <b>SMS</b>                  | Menon-Johansson 2006 | Quasi-experimental.         | At clinic w/untreated CT, GBR. n=28(Int)<br>n=21(Ctrl)                           | CT  | SMS to contact clinic for CT test result.                                                                             | TAT: Time from test to diagnosis & test to treat.                         | Shorter mean time to diagnosis. (7.9 days vs. 12.5; p<0.001)<br>Shorter median time to treat. (8.5 days vs. 15; p=0.005) / Effective.                                                                                                                                          |
| <b>SMS+PC</b>               | Barnabas 2016        | RCT                         | 16-49 yrs., ZAF & UGA.<br>n=284(Int)<br>n=224(Ctrl)                              | HIV | SMS promoting male circumcision 3W, 6-7W after tested negative. Follow-up phone call 1M & 2M following SMS reminders. | PB: Self-report.                                                          | Significant difference in reaching outcome at 3M (Intervention vs clinic referral); 48% (RR=1.72 95% CI 1.36-2.17, p values < 0.0001) in SMS reminder group and 47% (RR=1.67, 95%CI 1.29-2.14, p value = 0.0001) in lay counsellor follow-up achieved MC at 3M / Effective     |
| <b>SMS + MMS.</b>           | Cornelius 2013       | UnCtrlled trial.            | African-Americans age 13-18, USA. n=40                                           | HIV | HIV-prevention SMS + knowledge question for                                                                           | PB: Self-report.                                                          | Improved condom attitudes & HIV knowledge (83% vs.78% correct answers) / No impact.                                                                                                                                                                                            |

|                             |                   |                               |                                                                         |     |                                                                               |                                                  |                                                                                                                                                                                                                                                                                            |
|-----------------------------|-------------------|-------------------------------|-------------------------------------------------------------------------|-----|-------------------------------------------------------------------------------|--------------------------------------------------|--------------------------------------------------------------------------------------------------------------------------------------------------------------------------------------------------------------------------------------------------------------------------------------------|
|                             |                   |                               |                                                                         |     | 3W.                                                                           | Acceptability: Self-report.                      | 97% satisfied w/ number of SMS. 86% reported SMS not interfering w/ daily activities/ Highly acceptable.                                                                                                                                                                                   |
|                             |                   |                               |                                                                         |     |                                                                               | Feasibility: Completion rate.                    | 100% at pretest; 90% at 3M FU/ Highly feasible.                                                                                                                                                                                                                                            |
| <b>PC</b>                   | DiClemente 2014   | RCT                           | High-risk African-American women 14-20 yrs, USA. n=342(Int) n=359(Ctrl) | CT  | PC w/ prevention messages every 8W.                                           | PB: % diagnosed w/ CT or GC.<br>PB: Self-report. | Fewer participants diagnosed w/ CT & GC (90 vs. 104; RR = 0.5 (0.28-0.88), p=0.02. 48 vs. 54; RR = 0.4 (0.15-1.02), p=0.06) / Effective.<br>Higher condom use (MD=0.08(0.06 to 0.10) p=0.04) / Effective.                                                                                  |
| <b>SMS + cash incentive</b> | Juzang 2011       | Non-randomized Ctrlled trial. | African-American men 16-20 yrs, USA. n=30/group                         | HIV | 3 weekly SMS HIV prevention messages + \$40 for completion.                   | PB: Self-report.                                 | No statistical difference in % of protected sex. Higher awareness of sexual health / No impact.                                                                                                                                                                                            |
|                             |                   |                               |                                                                         |     |                                                                               | Feasibility: Retention rate.                     | 20 (67%) retained in Ctrl & 19 (63%) in SMS group after 2nd FU / Moderately feasible.                                                                                                                                                                                                      |
| <b>SMS</b>                  | Odeny 2014        | RCT                           | Circumcised male at clinic, 18+ yrs, KE. n=600(Int) n=600(Ctrl)         | HIV | Daily SMS for 1wk + SMS on days 8, 14, 21, 28, 35, 41, and 42 post-procedure. | PB: Self-report.                                 | Abstinence of sexual activity before 42-day follow up: 139/491(28.3%) vs. 124/493(25.2%) in control group (RR=1.13(0.91-1.38), p=0.3)/ No impact.                                                                                                                                          |
| <b>SMS</b>                  | Reback 2015       | UnCtrlled trial.              | MSM drug users 18-65 yrs, USA. n=52                                     | HIV | Daily SMS for 2W to reduce risky sexual behaviours.                           | PB: Self-report.                                 | Reduction in anal sex (6.9 vs. 2.6, t97=2.82, p<0.05) and unprotected anal sex (1.8 vs. 0.5, t97=2.19, p<0.05) in past 2M/ Effective.                                                                                                                                                      |
| <b>PC</b>                   | Belzer 2015       | RCT                           | HIV+ 12-29 yrs, USA. n=19(Int) n=18(Ctrl)                               | HIV | PC 1hr from time to take medication.                                          | Acceptability: Self-report.                      | 94% satisfied w/ call length and 81% would continue receiving calls / Highly acceptable.                                                                                                                                                                                                   |
|                             |                   |                               |                                                                         |     |                                                                               | Feasibility: Retention rate.                     | 63% retention rate / Moderately feasible.                                                                                                                                                                                                                                                  |
| <b>SMS</b>                  | Dean 2012         | Feasibility study.            | HIV+ at antenatal clinics, ZAF. n=7                                     | HIV | SMS support group+ inquiries answered by physicians.                          | Acceptability: Self-report.                      | Overall satisfaction.                                                                                                                                                                                                                                                                      |
|                             |                   |                               |                                                                         |     |                                                                               | Feasibility: Self-report.                        | SMS easily kept confidential.                                                                                                                                                                                                                                                              |
| <b>SMS</b>                  | Roth 2014         | Feasibility study.            | Sex workers 18+ yrs, USA. n=26                                          | HIV | Cell phone dairies to collect info about sexual events.                       | Acceptability: Self-report.                      | Cell-phone electronic dairies to collect sensitive information acceptable (84.6%)/ Highly acceptable.                                                                                                                                                                                      |
|                             |                   |                               |                                                                         |     |                                                                               | Feasibility: Completion rate.                    | 90.3% surveys completed / Highly feasible.                                                                                                                                                                                                                                                 |
| <b>SMS</b>                  | Georgette 2016    | Feasibility study.            | ≥18yrs, HIV+, ZAF. n=88                                                 | HIV | Weekly SMS reminders to increase ART adherence and appointment reminders      | Acceptability: Self-report.                      | 92% would recommend SMS program to a friend, 90.9% said frequency of SMS was just right, 2/88 felt the SMS program slightly violated their privacy. 97.7% reported it helped them remember to take medication. 77.3% agreed that it helped them remember appointments. / Highly acceptable |
| <b>SMS</b>                  | Reid 2014         | Cross-sectional study.        | HIV+, BWA. n=42(Int) n=41(Ctrl)                                         | HIV | SMS ARV pick-up reminder.                                                     | Acceptability: Self-report.                      | SMS helpful 93% (Int) vs. 58% (Ctrl) (p<0.001). SMS may lead to serostatus disclosure 10% vs. 56% (p<0.001). 95% satisfied w/ appointment scheduling. 90% would continue receiving SMS / Highly acceptable.                                                                                |
| <b>PC</b>                   | Bauermeister 2014 | Feasibility study.            | MSM 18-30, USA. n=124                                                   | HIV | IVRS: microbicide use.                                                        | Feasibility: Self-report.                        | 75.5% reported no problems using IVRS / Highly feasible.                                                                                                                                                                                                                                   |
| <b>SMS + MMS.</b>           | Cornelius 2011    | Feasibility study.            | African-Americans age 13-18, USA. n=12                                  | HIV | HIV-prevention SMS+knowledge question for 3W.                                 | Feasibility: Response rate.                      | 80% response rate/ Highly feasible.                                                                                                                                                                                                                                                        |

**Note:** Int= intervention; Ctrl= control; HxCtrl= historical control; PB= preventative behaviors (i.e. risk reduction); PN= partner notification; TAT= turnaround time; ATT= attendance rate; ART= ART adherence; NAPs= non-adherent patients; AP= adherent patients; PVLA= Patients with various levels of adherence; TNPs= Treatment naive patients; VL= viral load; CD4= CD4 cell count; PC= phone call; FB= Facebook.
