# Supplementary material for: Do digital innovations for HIV and sexually transmitted infections work? Results from a systematic review (1996-2017)
Source: PubMed Central journal article supplement (PMC5695353; doi:10.1136/bmjopen-2017-017604), 2017-11-03
Supplement: bmjopen-2017-017604supp003.pdf [file bmjopen-2017-017604supp003.pdf]

**Appendix 3. Table of studies by innovation (in rows) and by outcomes (in columns)**

|                                                        | <i>Outcome</i>                                   | <i>Attendance rate</i> | <i>ART adherence</i> | <i>Risk reduction</i> | <i>Partner notification</i> | <i>Turnaround time</i> | <i>Self-care</i> | <i>Feasibility</i> <sup>†</sup> | <i>Acceptability</i> <sup>†</sup> |
|--------------------------------------------------------|--------------------------------------------------|------------------------|----------------------|-----------------------|-----------------------------|------------------------|------------------|---------------------------------|-----------------------------------|
| <i>Number of Studies by Type of Digital Innovation</i> | <i>mHealth Innovations (SMS/phone call only)</i> | 30*                    | 24                   | 6                     | 0                           | 2*                     | 0                | 5                               | 2                                 |
|                                                        | <i>Internet-based m/eHealth Innovations</i>      | 6                      | 4                    | 5                     | 0                           | 0                      | 1                | 4                               | 1                                 |
|                                                        | <i>Combined innovations</i>                      | 1                      | 1                    | 0                     | 2                           | 0                      | 1                | 3                               | 1                                 |

*Note: \*1 study evaluated both attendance rate and turnaround time and was counted as part of the 30 studies on attendance rate. † studies reporting feasibility and acceptability as secondary outcomes are counted elsewhere in the table depending on primary outcome.*
